# Supplementary material for: Histone methyltransferases SDG33 and SDG34 regulate organ-specific nitrogen responses in tomato
Source: Front Plant Sci. 2022 Oct 12;13:1005077. doi: 10.3389/fpls.2022.1005077 (PMC9606235; doi:10.3389/fpls.2022.1005077)
Supplement: Supplementary file 2 [file DataSheet_2.xlsx]

## Sheet: TableS1
Supplemental table 1. Genes differentially expressed in slsdg33 vs WT in shoots.
A. Up-regulated genes in slsdg33 vs WT
Gene ID	ITAG3.2 annotation	Arabidopsis homolog	TAIR10 annotation	shared with slsdg34
Solyc01g009430.3	BnaA07g13420D protein (AHRD V3.3 *** A0A078ETL1_BRANA)	AT2G27830	NA	shared
Solyc01g079830.3	Fatty acid hydroxylase superfamily (AHRD V3.3 --* AT1G02205.1)	AT5G19190	NA	shared
Solyc01g106910.3	At4g33800-like protein (AHRD V3.3 *** A0A068F5X7_BRANA)	AT4G33800	NA	shared
Solyc01g107090.2	LOW QUALITY:beta-1,4-xylosidase (AHRD V3.3 *** AT3G19615.1)	AT3G19615	NA	shared
Solyc01g107100.3	LOW QUALITY:beta-1,4-xylosidase (AHRD V3.3 *** AT3G19615.1)	AT3G19615	NA	shared
Solyc02g078660.3	Hydroxyproline-rich glycoprotein family protein (AHRD V3.3 *-* AT1G61080.6)	AT4G04980	NA	shared
Solyc03g096180.3	ATP binding protein, putative (AHRD V3.3 *-* B9SLM8_RICCO)	AT2G40070	NA	shared
Solyc03g114430.1	LOW QUALITY:Transmembrane protein, putative (AHRD V3.3 *** A0A072VIN4_MEDTR)	AT1G74055	NA	shared
Solyc03g116630.3	cytochrome P450 family protein (AHRD V3.3 *** AT1G52565.1)	AT1G52565	NA	shared
Solyc03g117675.1	ATP-dependent DNA helicase (AHRD V3.3 *** AT2G24100.1)	AT2G24100	NA	shared
Solyc04g054340.1	LOW QUALITY:transmembrane protein (AHRD V3.3 --* AT5G65440.9)	AT5G65207	NA	shared
Solyc05g012850.2	transmembrane protein (AHRD V3.3 *** AT3G11810.1)	AT3G11810	NA	shared
Solyc05g015710.3	transmembrane protein (AHRD V3.3 *** AT1G27290.2)	AT1G27290	NA	shared
Solyc05g016060.3	cysteine-rich/transmembrane domain A-like protein (AHRD V3.3 *** AT2G32190.1)	AT2G32190	NA	shared
Solyc05g025900.3	Damaged dna-binding 2, putative isoform 1 (AHRD V3.3 *** A0A061GKJ3_THECC)	AT3G43850	NA	shared
Solyc05g053180.3	ABC-2 and Plant PDR ABC-type transporter family protein (AHRD V3.3 --* AT4G15233.6)	AT3G17580	NA	shared
Solyc06g068660.3	F-box/RNI superfamily protein (AHRD V3.3 *** AT1G73120.1)	AT1G73120	NA	shared
Solyc06g069640.3	dCTP pyrophosphatase 1 (AHRD V3.3 *** A0A151SL49_CAJCA)	AT3G25400	NA	shared
Solyc07g008930.1	LOW QUALITY:DUF4228 domain protein (AHRD V3.3 *** G7JUB6_MEDTR)	AT1G06980	NA	shared
Solyc07g041830.3	Damaged dna-binding 2, putative isoform 1 (AHRD V3.3 *** A0A061GM96_THECC)	AT5G21940	NA	shared
Solyc08g076520.3	Transmembrane protein, putative (AHRD V3.3 *** G7KCF0_MEDTR)	AT2G35470	NA	shared
Solyc09g011470.3	Plant/T7H20-70 protein (AHRD V3.3 *** G7L5L0_MEDTR)	AT5G02020	NA	shared
Solyc10g086570.3	Chaperone DnaJ (AHRD V3.3 *** A0A0B0NPS3_GOSAR)	AT5G02160	NA	shared
Solyc11g010625.1	Ribosomal RNA small subunit methyltransferase A (AHRD V3.3 *** A0A0B0NTG7_GOSAR)	AT4G38060	NA	shared
Solyc11g013330.2	BPS1-like protein (AHRD V3.3 *** AT1G22030.1)	AT1G22030	NA	shared
Solyc12g010420.1	LOW QUALITY:NHL domain protein (AHRD V3.3 --* AT5G14895.1)	AT5G11070	NA	shared
Solyc02g071475.1	2-oxoglutarate (2OG) and Fe(II)-dependent oxygenase superfamily protein (AHRD V3.3 *** AT4G25300.1)	AT4G25300	2-oxoglutarate (2OG) and Fe(II)-dependent oxygenase superfamily protein	shared
Solyc06g068270.3	2-oxoglutarate (2OG) and Fe(II)-dependent oxygenase superfamily protein (AHRD V3.3 *** AT1G49390.1)	AT1G49390	2-oxoglutarate (2OG) and Fe(II)-dependent oxygenase superfamily protein	shared
Solyc07g054920.2	2-oxoglutarate (2OG) and Fe(II)-dependent oxygenase superfamily protein (AHRD V3.3 *** AT2G44800.1)	AT2G44800	2-oxoglutarate (2OG) and Fe(II)-dependent oxygenase superfamily protein	shared
Solyc09g008560.3	2-oxoglutarate (2OG) and Fe(II)-dependent oxygenase superfamily protein (AHRD V3.3 *** AT2G36690.2)	AT2G36690	2-oxoglutarate (2OG) and Fe(II)-dependent oxygenase superfamily protein	shared
Solyc09g089780.3	2-oxoglutarate (2OG) and Fe(II)-dependent oxygenase superfamily protein (AHRD V3.3 *** AT1G06620.1)	AT1G06620	2-oxoglutarate (2OG) and Fe(II)-dependent oxygenase superfamily protein	shared
Solyc06g053670.1	Enoyl-CoA hydratase/isomerase family protein (AHRD V3.3 *** D7MH17_ARALL)	AT4G14440	3-hydroxyacyl-CoA dehydratase 1	shared
Solyc09g065780.3	3-ketoacyl-CoA synthase (AHRD V3.3 *** K4CUK4_SOLLC)	AT2G26640	3-ketoacyl-CoA synthase 11	shared
Solyc11g072980.1	3-ketoacyl-CoA synthase (AHRD V3.3 *** K4DB04_SOLLC)	AT1G07720	3-ketoacyl-CoA synthase 3	shared
Solyc12g099970.2	SNF1 kinase complex anchoring protein	AT5G21170	5'-AMP-activated protein kinase beta-2 subunit protein	shared
Solyc05g012110.3	6-phosphogluconolactonase, putative (AHRD V3.3 *** B9REC3_RICCO)	AT1G13700	6-phosphogluconolactonase 1	shared
Solyc02g030655.1	Ninja-family protein (AHRD V3.3 *-* A0A1D1YDC3_9ARAE)	AT3G29575	ABI five binding protein 3	shared
Solyc03g034240.3	Abscisic acid-deficient 4 (AHRD V3.3 *** A0A061EPF5_THECC)	AT1G67080	abscisic acid (aba)-deficient 4	shared
Solyc07g026650.3	1-aminocyclopropane-1-carboxylate oxidase 5	AT2G19590	ACC oxidase 1	shared
Solyc08g068700.1	Tyramine n-hydroxycinnamoyl transferase (AHRD V3.3 *** Q5D8C0_CAPAN)	AT2G39030	Acyl-CoA N-acyltransferases (NAT) superfamily protein	shared
Solyc08g068710.1	Tyramine n-hydroxycinnamoyl transferase (AHRD V3.3 *** Q5D8C0_CAPAN)	AT2G39030	Acyl-CoA N-acyltransferases (NAT) superfamily protein	shared
Solyc08g068730.1	Tyramine n-hydroxycinnamoyl transferase (AHRD V3.3 *** Q5D8C0_CAPAN)	AT2G39030	Acyl-CoA N-acyltransferases (NAT) superfamily protein	shared
Solyc08g068770.2	N-hydroxycinnamoyl-CoA:tyramine N-hydroxycinnamoyl transferase	AT2G39030	Acyl-CoA N-acyltransferases (NAT) superfamily protein	shared
Solyc08g068790.2	Tyramine n-hydroxycinnamoyl transferase (AHRD V3.3 *** Q5D8C0_CAPAN)	AT2G39030	Acyl-CoA N-acyltransferases (NAT) superfamily protein	shared
Solyc12g099940.2	Acyl-CoA N-acyltransferase (AHRD V3.3 *** A0A103YFJ4_CYNCS)	AT2G06025	Acyl-CoA N-acyltransferases (NAT) superfamily protein	shared
Solyc01g087070.3	ADP,ATP carrier protein, mitochondrial (AHRD V3.3 *** ADT1_SOLTU)	AT5G13490	ADP/ATP carrier 2	shared
Solyc01g109140.3	divinyl ether synthase	AT5G42650	allene oxide synthase	shared
Solyc03g116247.1	Alpha 1,4-glycosyltransferase family protein (AHRD V3.3 *-* Q2MGS1_MEDTR)	AT4G19900	alpha 1,4-glycosyltransferase family protein	shared
Solyc01g109720.3	alpha/beta-Hydrolases superfamily protein (AHRD V3.3 *** AT2G18360.1)	AT2G18360	alpha/beta-Hydrolases superfamily protein	shared
Solyc02g077430.3	Phospholipase A1 (AHRD V3.3 *** A5YW95_CAPAN)	AT4G18550	alpha/beta-Hydrolases superfamily protein	shared
Solyc04g077860.3	Sigma factor sigb regulation protein rsbq, putative (AHRD V3.3 *** B9R708_RICCO)	AT3G03990	alpha/beta-Hydrolases superfamily protein	shared
Solyc02g078380.3	Stem-specific protein TSJT1 (AHRD V3.3 *** A0A151T7D1_CAJCA)	AT4G27450	Aluminium induced protein with YGL and LRDR motifs	shared
Solyc02g078500.2	Stem-specific protein TSJT1, putative (AHRD V3.3 *** B9RZ68_RICCO)	AT4G27450	Aluminium induced protein with YGL and LRDR motifs	shared
Solyc03g006490.3	glutaminase domain-containing protein	AT4G27450	Aluminium induced protein with YGL and LRDR motifs	shared
Solyc12g013700.2	Stem-specific protein tsjt1, putative (AHRD V3.3 *** D6BRF0_JATCU)	AT4G27450	Aluminium induced protein with YGL and LRDR motifs	shared
Solyc09g074280.1	LOW QUALITY:Ankyrin repeat-containing protein (AHRD V3.3 *** A0A118K274_CYNCS)	AT1G07710	Ankyrin repeat family protein	shared
Solyc05g009790.1	AP2/B3 transcription factor family protein (AHRD V3.3 *** AT1G25560.1)	AT1G25560	AP2/B3 transcription factor family protein	shared
Solyc06g068570.3	AP2-like ethylene-responsive transcription factor	AT1G16060	ARIA-interacting double AP2 domain protein	shared
Solyc04g077850.3	U-box domain-containing protein (AHRD V3.3 *** A0A0K9PK99_ZOSMR)	AT3G01400	ARM repeat superfamily protein	shared
Solyc05g006550.3	Microtubule-associated protein TORTIFOLIA1, putative (AHRD V3.3 *** B9S2H6_RICCO)	AT1G27210	ARM repeat superfamily protein	shared
Solyc02g065150.2	LOB domain-containing 36-like protein (AHRD V3.3 *** A0A0B0PS92_GOSAR)	AT5G66870	ASYMMETRIC LEAVES 2-like 1	shared
Solyc05g053000.1	AT hook motif DNA-binding family protein (AHRD V3.3 *** A0A072V017_MEDTR)	AT3G55560	AT-hook protein of GA feedback 2	shared
Solyc06g070960.2	ABC transporter family protein (AHRD V3.3 *** A0A097P9Q6_HEVBR)	AT3G47730	ATP-binding cassette A2	shared
Solyc01g108790.2	3-hydroxyisobutyryl-CoA hydrolase-like protein (AHRD V3.3 *-* A0A072TX02_MEDTR)	AT2G30650	ATP-dependent caseinolytic (Clp) protease/crotonase family protein	shared
Solyc03g115870.3	Thioredoxin (AHRD V3.3 *** A0A072UTZ5_MEDTR)	AT5G61440	atypical CYS HIS rich thioredoxin 5	shared
Solyc07g016180.3	Auxin Response Factor 7A	AT1G19220	auxin response factor 19	shared
Solyc12g096570.1	ARGOS (AHRD V3.3 *** C7SFP7_SOLLC)	AT3G59900	auxin-regulated gene involved in organ size	shared
Solyc01g107400.2	IAA-amido synthetase	AT2G14960	Auxin-responsive GH3 family protein	shared
Solyc02g064830.3	Indole-3-acetic acid-amido synthetas 3-3	AT2G14960	Auxin-responsive GH3 family protein	shared
Solyc08g068480.1	Indole-3-acetic acid-amido synthetase GH3.5 (AHRD V3.3 *-* A0A061E4T5_THECC)	AT4G03400	Auxin-responsive GH3 family protein	shared
Solyc08g068490.3	Auxin-responsive GH3 family protein (AHRD V3.3 *** AT4G03400.2)	AT4G03400	Auxin-responsive GH3 family protein	shared
Solyc12g005310.2	Auxin-responsive GH3 family protein (AHRD V3.3 *** AT5G54510.1)	AT5G54510	Auxin-responsive GH3 family protein	shared
Solyc10g055820.2	Chitinase (AHRD V3.3 *** B9VRK7_CAPAN)	AT3G12500	basic chitinase	shared
Solyc04g005660.3	Transcription factor protein (AHRD V3.3 *** A0A0B0MSC8_GOSAR)	AT3G28857	basic helix-loop-helix (bHLH) DNA-binding family protein	shared
Solyc03g121240.1	basic helix-loop-helix (bHLH) DNA-binding superfamily protein (AHRD V3.3 *** AT3G21330.1)	AT3G21330	basic helix-loop-helix (bHLH) DNA-binding superfamily protein	shared
Solyc04g078790.3	basic helix-loop-helix (bHLH) DNA-binding superfamily protein (AHRD V3.3 *** AT3G50330.1)	AT3G50330	basic helix-loop-helix (bHLH) DNA-binding superfamily protein	shared
Solyc03g043900.1	Basic-leucine zipper (BZIP) transcription factor family (AHRD V3.3 *-* A0A0K9NZH2_ZOSMR)	AT3G49760	basic leucine-zipper 5	shared
Solyc00g174330.3	Pathogenesis-related protein 1 (AHRD V3.3 *-* Q75QH2_CAPCH)	AT2G14580	basic pathogenesis-related protein 1	shared
Solyc07g042510.3	Bax inhibitor-1 family protein (AHRD V3.3 *** AT4G15470.1)	AT4G15470	Bax inhibitor-1 family protein	shared
Solyc08g044510.3	Beta-glucosidase (AHRD V3.3 *** L0ASF2_POPTO)	AT2G44480	beta glucosidase 17	shared
Solyc04g016470.3	LEQA L.esculentum TomQ'a beta(1,3)glucanase	AT3G57270	beta-1,3-glucanase 1	shared
Solyc01g104950.3	LEXYL2	AT5G64570	beta-D-xylosidase 4	shared
Solyc12g008840.2	beta-galactosidase 4	AT4G26140	beta-galactosidase 12	shared
Solyc01g110000.3	Beta-galactosidase (AHRD V3.3 *** A0A0V0ITW0_SOLCH)	AT4G36360	beta-galactosidase 3	shared
Solyc11g044910.2	Beta-D-xylosidase family protein (AHRD V3.3 *** B9HWX2_POPTR)	AT5G49360	beta-xylosidase 1	shared
Solyc08g007460.2	Lipid transfer protein (AHRD V3.3 *** I3SGW1_MEDTR)	AT1G62790	Bifunctional inhibitor/lipid-transfer protein/seed storage 2S albumin superfamily protein	shared
Solyc08g078870.2	14 kDa proline-rich protein DC2.15, putative (AHRD V3.3 *** B9RD76_RICCO)	AT4G12510	Bifunctional inhibitor/lipid-transfer protein/seed storage 2S albumin superfamily protein	shared
Solyc08g078890.2	Bifunctional inhibitor/lipid-transfer protein/seed storage 2S albumin superfamily protein (AHRD V3.3 *-* AT1G62500.1)	AT1G62500	Bifunctional inhibitor/lipid-transfer protein/seed storage 2S albumin superfamily protein	shared
Solyc08g079190.1	Bifunctional inhibitor/lipid-transfer protein/seed storage 2S albumin superfamily protein (AHRD V3.3 *** AT4G12490.1)	AT4G12490	Bifunctional inhibitor/lipid-transfer protein/seed storage 2S albumin superfamily protein	shared
Solyc08g079230.1	Bifunctional inhibitor/lipid-transfer protein/seed storage 2S albumin superfamily protein (AHRD V3.3 *** A0A061DW53_THECC)	AT4G12490	Bifunctional inhibitor/lipid-transfer protein/seed storage 2S albumin superfamily protein	shared
Solyc09g082270.3	Lipid transfer protein (AHRD V3.3 *** G7K520_MEDTR)	AT3G22600	Bifunctional inhibitor/lipid-transfer protein/seed storage 2S albumin superfamily protein	shared
Solyc01g109600.3	BTB/POZ domain-containing protein (AHRD V3.3 *** A0A1D1XPT6_9ARAE)	AT3G05675	BTB/POZ domain-containing protein	shared
Solyc04g082420.3	BTB/POZ domain-containing protein (AHRD V3.3 *** AT2G30600.6)	AT2G30600	BTB/POZ domain-containing protein	shared
Solyc06g053720.2	Zinc finger, C2H2 (AHRD V3.3 *** A0A124SAQ3_CYNCS)	AT3G23130	C2H2 and C2HC zinc fingers superfamily protein	shared
Solyc06g061160.1	LOW QUALITY:Zinc finger, C2H2 (AHRD V3.3 *** A0A103XFH7_CYNCS)	AT4G17810	C2H2 and C2HC zinc fingers superfamily protein	shared
Solyc02g085580.3	Zinc finger protein (AHRD V3.3 *** K9P0T0_9ROSI)	AT5G66730	C2H2-like zinc finger protein	shared
Solyc05g054650.1	Zinc finger family protein (AHRD V3.3 *** B9HM54_POPTR)	AT2G28710	C2H2-type zinc finger family protein	shared
Solyc06g005180.1	LOW QUALITY:Zinc finger family protein (AHRD V3.3 *** B9GPB9_POPTR)	AT1G02040	C2H2-type zinc finger family protein	shared
Solyc06g074800.1	LOW QUALITY:Zinc finger family protein (AHRD V3.3 *** B9HQP7_POPTR)	AT2G28200	C2H2-type zinc finger family protein	shared
Solyc07g006370.1	Cation calcium exchanger (AHRD V3.3 *** A0A072U799_MEDTR)	AT5G17860	calcium exchanger 7	shared
Solyc01g010020.3	Calmodulin, putative (AHRD V3.3 *** B9RLA1_RICCO)	AT3G25600	Calcium-binding EF-hand family protein	shared
Solyc06g068940.3	Calcium-dependent lipid-binding (CaLB domain) family protein (AHRD V3.3 *** AT3G17980.1)	AT3G17980	Calcium-dependent lipid-binding (CaLB domain) family protein	shared
Solyc09g007010.1	Pathogenesis-related protein 1 (AHRD V3.3 *** Q75QH2_CAPCH)	AT4G33720	CAP (Cysteine-rich secretory proteins, Antigen 5, and Pathogenesis-related 1 protein) superfamily protein	shared
Solyc07g047940.3	Zinc finger transcription factor 49	AT2G05160	CCCH-type zinc fingerfamily protein with RNA-binding domain	shared
Solyc09g092110.3	Light-regulated (AHRD V3.3 *** A0A0B0P5I2_GOSAR)	AT3G26740	CCR-like	shared
Solyc02g083835.1	Chaperone DnaJ-like protein (AHRD V3.3 *** A0A1C6ZYA6_MEDSA)	AT4G36040	Chaperone DnaJ-domain superfamily protein	shared
Solyc03g117590.3	Heat shock protein binding protein (AHRD V3.3 *** E2DDU6_SOLLC)	AT1G80920	Chaperone DnaJ-domain superfamily protein	shared
Solyc04g081530.1	DNAJ-like protein (AHRD V3.3 *** A2TJX6_SOLLC)	AT4G36040	Chaperone DnaJ-domain superfamily protein	shared
Solyc06g068500.3	Chaperone DnaJ domain protein (AHRD V3.3 *** B7FGF7_MEDTR)	AT1G80920	Chaperone DnaJ-domain superfamily protein	shared
Solyc07g065970.1	Chaperone protein DNAj, putative (AHRD V3.3 *** B9SXA3_RICCO)	AT3G13310	Chaperone DnaJ-domain superfamily protein	shared
Solyc02g094060.3	Chloride channel protein (AHRD V3.3 *** Q9XF71_TOBAC)	AT5G40890	chloride channel A	shared
Solyc02g070990.1	Chlorophyll a-b binding protein, chloroplastic (AHRD V3.3 *** K4B877_SOLLC)	AT1G29930	chlorophyll A/B binding protein 1	shared
Solyc02g071000.1	Chlorophyll a-b binding protein, chloroplastic (AHRD V3.3 *** K4B878_SOLLC)	AT1G29930	chlorophyll A/B binding protein 1	shared
Solyc06g054540.3	CHY-type/CTCHY-type/RING-type Zinc finger protein (AHRD V3.3 *** AT5G18650.1)	AT5G18650	CHY-type/CTCHY-type/RING-type Zinc finger protein	shared
Solyc02g086300.3	Class I glutamine amidotransferase-like superfamily protein (AHRD V3.3 *** AT5G38200.1)	AT5G38200	Class I glutamine amidotransferase-like superfamily protein	shared
Solyc03g118360.2	LOW QUALITY:ATP-dependent Clp protease ATP-binding subunit (AHRD V3.3 *-* A0A072V2V0_MEDTR)	AT5G50920	CLPC homologue 1	shared
Solyc02g068300.3	clade XVI lectin receptor kinase	AT5G06740	Concanavalin A-like lectin protein kinase family protein	shared
Solyc11g006470.2	Core-2/I-branching beta-1,6-N-acetylglucosaminyltransferase family protein (AHRD V3.3 *** AT5G22070.1)	AT5G22070	Core-2/I-branching beta-1,6-N-acetylglucosaminyltransferase family protein	shared
Solyc10g049970.2	Kynurenine formamidase (AHRD V3.3 *** A0A151RRB2_CAJCA)	AT1G44542	Cyclase family protein	shared
Solyc01g073810.2	LOW QUALITY:Cysteine/Histidine-rich C1 domain family protein (AHRD V3.3 *** AT2G44380.1)	AT2G44380	Cysteine/Histidine-rich C1 domain family protein	shared
Solyc01g073820.3	LOW QUALITY:Cysteine/Histidine-rich C1 domain family protein (AHRD V3.3 *** AT2G44380.1)	AT2G44380	Cysteine/Histidine-rich C1 domain family protein	shared
Solyc01g073830.1	LOW QUALITY:Cysteine/Histidine-rich C1 domain family protein (AHRD V3.3 *-* AT2G27660.1)	AT2G44380	Cysteine/Histidine-rich C1 domain family protein	shared
Solyc01g073840.1	LOW QUALITY:Cysteine/Histidine-rich C1 domain family protein (AHRD V3.3 *** AT2G44380.1)	AT2G44380	Cysteine/Histidine-rich C1 domain family protein	shared
Solyc01g073860.3	Cysteine/Histidine-rich C1 domain family protein (AHRD V3.3 *** AT2G44380.1)	AT2G44380	Cysteine/Histidine-rich C1 domain family protein	shared
Solyc09g011260.2	Cysteine/Histidine-rich C1 domain family protein (AHRD V3.3 *** AT2G37820.1)	AT2G37820	Cysteine/Histidine-rich C1 domain family protein	shared
Solyc03g033770.1	P-loop containing nucleoside triphosphate hydrolases superfamily protein (AHRD V3.3 --* AT3G50940.1)	AT3G50930	cytochrome BC1 synthesis	shared
Solyc12g045020.2	Cytochrome P450 family protein (AHRD V3.3 *** B9HFW5_POPTR)	AT5G07990	Cytochrome P450 superfamily protein	shared
Solyc11g007980.2	Cytochrome P450 (AHRD V3.3 *** Q9AVQ2_SOLTU)	AT3G26300	cytochrome P450, family 71, subfamily B, polypeptide 34	shared
Solyc04g063245.1	Cytochrome P450 (AHRD V3.3 *** Q9M7M3_CAPAN)	AT3G26330	cytochrome P450, family 71, subfamily B, polypeptide 37	shared
Solyc07g055440.2	Cytochrome P450 (AHRD V3.3 *** A0A124SAX2_CYNCS)	AT3G14690	cytochrome P450, family 72, subfamily A, polypeptide 15	shared
Solyc02g090350.3	Cytochrome P450 (AHRD V3.3 *** A0A103Y530_CYNCS)	AT2G45550	cytochrome P450, family 76, subfamily C, polypeptide 4	shared
Solyc10g083690.3	Cytochrome P450 (AHRD V3.3 *** Q8H0I7_PETHY)	AT3G52970	cytochrome P450, family 76, subfamily G, polypeptide 1	shared
Solyc04g079660.2	Cytochrome P450 (AHRD V3.3 *** A0A103YCJ3_CYNCS)	AT4G31940	cytochrome P450, family 82, subfamily C, polypeptide 4	shared
Solyc10g080815.1	Cytochrome P450 (AHRD V3.3 *-* A0A103Y9U2_CYNCS)	AT3G26125	cytochrome P450, family 86, subfamily C, polypeptide 2	shared
Solyc06g074420.1	Cytochrome P450 family protein (AHRD V3.3 *** B9HQW0_POPTR)	AT2G27690	cytochrome P450, family 94, subfamily C, polypeptide 1	shared
Solyc10g080813.1	Cytochrome P450 (AHRD V3.3 *-* A2PZD4_IPONI)	AT2G23180	cytochrome P450, family 96, subfamily A, polypeptide 1	shared
Solyc10g080817.1	Cytochrome P450 (AHRD V3.3 *** A2PZD4_IPONI)	AT2G23180	cytochrome P450, family 96, subfamily A, polypeptide 1	shared
Solyc10g078220.2	Cytochrome P450 (AHRD V3.3 *** A9ZT63_COPJA)	AT2G40890	cytochrome P450, family 98, subfamily A, polypeptide 3	shared
Solyc06g082590.1	DNA-binding protein Pti6	AT4G27950	cytokinin response factor 4	shared
Solyc07g055690.1	Serine/threonine-protein kinase (AHRD V3.3 *** G4XXY5_NICAT)	AT1G78820	D-mannose binding lectin protein with Apple-like carbohydrate-binding domain	shared
Solyc10g086565.1	S-acyltransferase (AHRD V3.3 *** A0A0V0I2F0_SOLCH)	AT3G09320	DHHC-type zinc finger family protein	shared
Solyc07g008600.1	LOW QUALITY:Leucine-rich receptor-like kinase family protein (AHRD V3.3 *** A0A072UGF0_MEDTR)	AT2G34930	disease resistance family protein / LRR family protein	shared
Solyc07g008620.1	EIX receptor 1	AT2G34930	disease resistance family protein / LRR family protein	shared
Solyc03g005670.3	Disease resistance protein (CC-NBS-LRR class) family protein (AHRD V3.3 *** G7IID2_MEDTR)	AT5G35450	Disease resistance protein (CC-NBS-LRR class) family	shared
Solyc05g007640.3	Disease resistance protein (NBS-LRR class) family (AHRD V3.3 *-* AT5G38350.1)	AT5G48620	Disease resistance protein (CC-NBS-LRR class) family	shared
Solyc05g044490.2	NBS-LRR resistance protein-like protein (AHRD V3.3 *** A1Y9R1_SOLLC)	AT5G35450	Disease resistance protein (CC-NBS-LRR class) family	shared
Solyc03g025350.3	Divalent ion symporter (AHRD V3.3 *** AT1G02260.2)	AT1G02260	Divalent ion symporter	shared
Solyc05g053760.3	Chaperone protein DNAj, putative (AHRD V3.3 *** B9SYM1_RICCO)	AT4G13830	DNAJ-like 20	shared
Solyc09g092260.3	chaperone protein dnaJ 20	AT4G13830	DNAJ-like 20	shared
Solyc09g065480.2	Type I inositol-1,4,5-trisphosphate 5-phosphatase CVP2 (AHRD V3.3 *** A0A151RLD8_CAJCA)	AT3G63240	DNAse I-like superfamily protein	shared
Solyc02g093750.3	C3H4 type zinc finger protein (DUF23) (AHRD V3.3 *** AT5G40720.3)	AT5G40720	Domain of unknown function (DUF23)	shared
Solyc02g077880.3	auxin repressed/dormancy associated protein	AT2G33830	Dormancy/auxin associated family protein	shared
Solyc03g006360.3	Auxin-repressed protein (AHRD V3.3 *** K7VPG9_SOLTU)	AT2G33830	Dormancy/auxin associated family protein	shared
Solyc06g063060.3	Auxin-repressed protein-like protein (AHRD V3.3 *** Q84KS0_TOBAC)	AT1G54070	Dormancy/auxin associated family protein	shared
Solyc07g063610.3	Dynein light chain family protein (AHRD V3.3 *** B9N570_POPTR)	AT4G27360	Dynein light chain type 1 family protein	shared
Solyc08g066740.3	Early nodulin-like protein 1 (AHRD V3.3 *** A0A151U5D7_CAJCA)	AT1G64640	early nodulin-like protein 8	shared
Solyc12g009560.2	EIN3-binding F-box protein 1	AT2G25490	EIN3-binding F box protein 1	shared
Solyc09g089930.2	ethylene responsive factor E.2	AT3G23240	ethylene response factor 1	shared
Solyc05g052050.1	DNA-binding protein Pti4	AT4G17500	ethylene responsive element binding factor 1	shared
Solyc08g007230.2	Ethylene-responsive transcription factor (AHRD V3.3 *** A0A024CAT9_BRAJU)	AT5G47220	ethylene responsive element binding factor 2	shared
Solyc08g078180.1	Ethylene Response Factor A.1	AT5G47220	ethylene responsive element binding factor 2	shared
Solyc01g079940.3	Eukaryotic aspartyl protease family protein (AHRD V3.3 *** AT1G03220.1)	AT1G03220	Eukaryotic aspartyl protease family protein	shared
Solyc01g080020.2	Eukaryotic aspartyl protease family protein, putative (AHRD V3.3 *** A0A061ELJ0_THECC)	AT1G03230	Eukaryotic aspartyl protease family protein	shared
Solyc01g098770.1	Eukaryotic aspartyl protease family protein, putative (AHRD V3.3 *** A0A061F3Y1_THECC)	AT1G03220	Eukaryotic aspartyl protease family protein	shared
Solyc02g065050.1	Eukaryotic aspartyl protease family protein (AHRD V3.3 *** AT2G39710.1)	AT2G39710	Eukaryotic aspartyl protease family protein	shared
Solyc05g054820.1	LOW QUALITY:Exocyst subunit EXO70 family protein (AHRD V3.3 *** B9HTX5_POPTR)	AT2G39380	exocyst subunit exo70 family protein H2	shared
Solyc06g049050.3	expansin 2	AT2G40610	expansin A8	shared
Solyc02g070110.1	FAD-binding Berberine family protein (AHRD V3.3 *** A0A061GF79_THECC)	AT5G44440	FAD-binding Berberine family protein	shared
Solyc06g065060.1	FAD-binding Berberine family protein (AHRD V3.3 *** A0A061GF79_THECC)	AT5G44440	FAD-binding Berberine family protein	shared
Solyc04g040120.1	Fatty acid desaturase (AHRD V3.3 *** I3RV99_9ERIC)	AT3G12120	fatty acid desaturase 2	shared
Solyc04g040130.1	Fatty acid desaturase (AHRD V3.3 *** I3RV99_9ERIC)	AT3G12120	fatty acid desaturase 2	shared
Solyc12g036520.2	Fatty acid desaturase (AHRD V3.3 *** E5D7U7_9GENT)	AT3G12120	fatty acid desaturase 2	shared
Solyc12g049030.1	Fatty acid desaturase (AHRD V3.3 *** B3SP99_CAPAN)	AT3G12120	fatty acid desaturase 2	shared
Solyc12g100230.1	Fatty acid desaturase (AHRD V3.3 *** E5D7U7_9GENT)	AT3G12120	fatty acid desaturase 2	shared
Solyc12g100250.2	Fatty acid desaturase (AHRD V3.3 *** E5D7U7_9GENT)	AT3G12120	fatty acid desaturase 2	shared
Solyc01g066980.3	Flowering promoting factor 1 (AHRD V3.3 *** A0A061EW40_THECC)	AT5G24860	flowering promoting factor 1	shared
Solyc11g032220.2	12-oxophytodienoate reductase-like protein (AHRD V3.3 *** G7K3S4_MEDTR)	AT1G18020	FMN-linked oxidoreductases superfamily protein	shared
Solyc04g077840.2	F-box family protein (AHRD V3.3 --* D7MPB2_ARALL)	AT5G43190	Galactose oxidase/kelch repeat superfamily protein	shared
Solyc10g080610.1	F-box/kelch-repeat protein (AHRD V3.3 *** A0A172MAC1_VITPS)	AT1G15670	Galactose oxidase/kelch repeat superfamily protein	shared
Solyc10g083880.2	tonoplast intrinsic protein 1.3	AT2G36830	gamma tonoplast intrinsic protein	shared
Solyc01g090760.3	GATA transcription factor (AHRD V3.3 *** K4AZ17_SOLLC)	AT2G45050	GATA transcription factor 2	shared
Solyc06g065010.3	Lipase, GDSL (AHRD V3.3 *** A0A124SDS7_CYNCS)	AT5G40990	GDSL lipase 1	shared
Solyc09g030370.3	GDSL esterase/lipase (AHRD V3.3 *** A0A0B2SPC5_GLYSO)	AT2G30310	GDSL-like Lipase/Acylhydrolase family protein	shared
Solyc04g028470.2	GDSL lipase-like protein (AHRD V3.3 *** H6U1I8_TANCI)	AT1G53920	GDSL-motif lipase 5	shared
Solyc03g119910.3	Le3OH-23b-hydroxylase	AT1G15550	gibberellin 3-oxidase 1	shared
Solyc02g083880.3	Gibberellin-regulated protein 2, putative (AHRD V3.3 *** B9SLF4_RICCO)	AT2G18420	Gibberellin-regulated family protein	shared
Solyc02g089350.3	Gibberellin-regulated family protein (AHRD V3.3 *** A0A061EVH9_THECC)	AT1G74670	Gibberellin-regulated family protein	shared
Solyc12g096480.1	Glutamine dumper 4, putative (AHRD V3.3 *** A0A061GHE4_THECC)	AT4G25760	glutamine dumper 2	shared
Solyc12g096490.1	Glutamine dumper 4, putative (AHRD V3.3 *** A0A061GHE4_THECC)	AT2G24762	glutamine dumper 4	shared
Solyc01g067440.3	Glutaredoxin family protein (AHRD V3.3 *** AT3G21460.1)	AT3G21460	Glutaredoxin family protein	shared
Solyc11g005270.1	LOW QUALITY:Glutaredoxin family protein (AHRD V3.3 *** AT5G13810.1)	AT5G13810	Glutaredoxin family protein	shared
Solyc09g011520.3	Glutathione S-transferase-like protein (AHRD V3.3 *** K7VK72_SOLTU)	AT3G09270	glutathione S-transferase TAU 8	shared
Solyc04g064920.3	Glycolipid transfer protein domain-containing protein (AHRD V3.3 *** A0A118JYI2_CYNCS)	AT3G21260	Glycolipid transfer protein (GLTP) family protein	shared
Solyc01g059965.1	Beta-1,3-glucanase (AHRD V3.3 *** G9G7S0_HEVBR)	AT4G16260	Glycosyl hydrolase superfamily protein	shared
Solyc03g083910.4	symbol=TIV1	AT1G62660	Glycosyl hydrolases family 32 protein	shared
Solyc03g044910.1	GNS1/SUR4 membrane protein family (AHRD V3.3 *** AT4G36830.1)	AT4G36830	GNS1/SUR4 membrane protein family	shared
Solyc02g092570.1	Transcription factor GRAS (AHRD V3.3 *** A0A103Y551_CYNCS)	AT3G49950	GRAS family transcription factor	shared
Solyc10g086380.1	GAI-like protein 1 (AHRD V3.3 *** A1YWN9_9ROSI)	AT1G14920	GRAS family transcription factor family protein	shared
Solyc12g008510.2	Phosphotransferase (AHRD V3.3 *** K4DBT9_SOLLC)	AT2G19860	hexokinase 2	shared
Solyc01g098400.3	Histidine-containing phosphotransfer protein, putative (AHRD V3.3 *** B9REZ5_RICCO)	AT3G21510	histidine-containing phosphotransmitter 1	shared
Solyc08g077730.3	Phosphatidylinositol-4-phosphate 5-kinase 5-like protein (AHRD V3.3 *** A0A0B0PLQ6_GOSAR)	AT4G17080	Histone H3 K4-specific methyltransferase SET7/9 family protein	shared
Solyc02g077590.1	Homeobox-leucine zipper protein family (AHRD V3.3 *-* AT1G69780.1)	AT5G53980	homeobox protein 52	shared
Solyc04g072000.3	Chitinase (AHRD V3.3 *** A0A1B1HY32_9APIA)	AT3G54420	homolog of carrot EP3-3 chitinase	shared
Solyc05g052670.1	LOW QUALITY:HXXXD-type acyl-transferase family protein (AHRD V3.3 *** AT2G39980.1)	AT2G39980	HXXXD-type acyl-transferase family protein	shared
Solyc05g052680.1	LOW QUALITY:HXXXD-type acyl-transferase family protein (AHRD V3.3 *** AT2G39980.1)	AT2G39980	HXXXD-type acyl-transferase family protein	shared
Solyc12g096770.1	LOW QUALITY:HXXXD-type acyl-transferase family protein, putative (AHRD V3.3 *** A0A061E8Z9_THECC)	AT3G26040	HXXXD-type acyl-transferase family protein	shared
Solyc03g032010.3	3-hydroxy-3-methylglutaryl-coenzyme A reductase 3 (AHRD V3.3 *** HMDH3_SOLTU)	AT1G76490	hydroxy methylglutaryl CoA reductase 1	shared
Solyc03g032020.3	3-hydroxy-3-methylglutaryl coenzyme A reductase (AHRD V3.3 *** K4BFH3_SOLLC)	AT1G76490	hydroxy methylglutaryl CoA reductase 1	shared
Solyc05g052030.1	ethylene response factor 4	AT5G07580	Integrase-type DNA-binding superfamily protein	shared
Solyc05g052040.1	Ethylene-responsive transcription factor (AHRD V3.3 *** M4WYH8_GOSHI)	AT5G51190	Integrase-type DNA-binding superfamily protein	shared
Solyc06g033850.3	Dehydration responsive element-binding factor protein (AHRD V3.3 --* A0A0K0K9Y3_ELECO)	AT1G75490	Integrase-type DNA-binding superfamily protein	shared
Solyc11g012980.1	Ethylene-responsive transcription factor (AHRD V3.3 *** A0A0K9P1G2_ZOSMR)	AT1G21910	Integrase-type DNA-binding superfamily protein	shared
Solyc09g090900.3	Aconitate hydratase (AHRD V3.3 *** A0A059LL79_9CHLO)	AT4G13430	isopropyl malate isomerase large subunit 1	shared
Solyc08g036640.3	Jasmonate zim-domain protein (AHRD V3.3 *** G7LE60_MEDTR)	AT1G30135	jasmonate-zim-domain protein 8	shared
Solyc03g020010.1	miraculin	AT1G17860	Kunitz family trypsin and protease inhibitor protein	shared
Solyc03g098680.3	Kunitz trypsin inhibitor (AHRD V3.3 *** Q4W181_POPTN)	AT1G73325	Kunitz family trypsin and protease inhibitor protein	shared
Solyc03g098720.3	Kunitz trypsin inhibitor (AHRD V3.3 *** Q4W188_POPTN)	AT1G73325	Kunitz family trypsin and protease inhibitor protein	shared
Solyc03g098730.1	Kunitz trypsin inhibitor (AHRD V3.3 *** B8Y888_TOBAC)	AT1G17860	Kunitz family trypsin and protease inhibitor protein	shared
Solyc03g098740.1	Kunitz trypsin inhibitor (AHRD V3.3 *** B8Y888_TOBAC)	AT1G17860	Kunitz family trypsin and protease inhibitor protein	shared
Solyc04g072280.3	Laccase (AHRD V3.3 *** A0A022Q9N6_ERYGU)	AT5G09360	laccase 14	shared
Solyc10g081970.2	Late embryogenesis abundant (LEA) hydroxyproline-rich glycoprotein family (AHRD V3.3 *** AT2G35980.1)	AT2G35980	Late embryogenesis abundant (LEA) hydroxyproline-rich glycoprotein family	shared
Solyc07g005110.3	Receptor-like kinase CHRK1 (AHRD V3.3 *** Q9SWX8_TOBAC)	AT3G16030	lectin protein kinase family protein	shared
Solyc10g050110.1	Leucine-rich repeat receptor-like protein kinase family (AHRD V3.3 *** A0A0K9PL83_ZOSMR)	AT3G19320	Leucine-rich repeat (LRR) family protein	shared
Solyc04g012100.2	Leucine-rich receptor-like protein kinase family protein (AHRD V3.3 *** AT5G46330.2)	AT3G47570	Leucine-rich repeat protein kinase family protein	shared
Solyc05g006670.1	LOW QUALITY:Leucine-rich repeat receptor protein kinase family protein (AHRD V3.3 *** A0A061E5L2_THECC)	AT4G20140	Leucine-rich repeat transmembrane protein kinase	shared
Solyc05g007230.3	Receptor-like kinase (AHRD V3.3 *** A0A0K9NLV5_ZOSMR)	AT4G20140	Leucine-rich repeat transmembrane protein kinase	shared
Solyc03g096540.3	PLAT domain-containing protein 1 (AHRD V3.3 *** PLAT1_ARATH)	AT2G22170	Lipase/lipooxygenase, PLAT/LH2 family protein	shared
Solyc10g075150.2	Non-specific lipid-transfer protein (AHRD V3.3 *** M1AVB3_SOLTU)	AT3G51590	lipid transfer protein 12	shared
Solyc08g029000.3	Lipoxygenase (AHRD V3.3 *** Q43800_TOBAC)	AT1G55020	lipoxygenase 1	shared
Solyc02g092550.3	LOB domain-containing protein, putative (AHRD V3.3 *** B9SGY6_RICCO)	AT5G67420	LOB domain-containing protein 37	shared
Solyc03g119530.3	LOB domain protein 40 (AHRD V3.3 *** K7VSW9_SOLTU)	AT3G02550	LOB domain-containing protein 41	shared
Solyc02g014430.3	Equilibrative nucleoside transporter (AHRD V3.3 *** A0A103XTG7_CYNCS)	AT4G05120	Major facilitator superfamily protein	shared
Solyc02g062890.2	polyol monosaccharide transporter 5	AT4G36670	Major facilitator superfamily protein	shared
Solyc02g063020.2	Major facilitator superfamily transporter (AHRD V3.3 *** A0A0K9PQR0_ZOSMR)	AT4G36790	Major facilitator superfamily protein	shared
Solyc04g055080.3	Major facilitator superfamily transporter (AHRD V3.3 *** A0A0K0KFR2_CARHR)	AT5G10190	Major facilitator superfamily protein	shared
Solyc05g051900.3	Major facilitator superfamily transporter (AHRD V3.3 *** A0A0K0KFR2_CARHR)	AT5G10190	Major facilitator superfamily protein	shared
Solyc06g054270.3	Sugar transporter protein 11	AT5G26250	Major facilitator superfamily protein	shared
Solyc10g083940.1	Nodulin-like / Major Facilitator Superfamily protein (AHRD V3.3 *** A0A0K9NWX1_ZOSMR)	AT2G39210	Major facilitator superfamily protein	shared
Solyc12g006050.2	Major facilitator superfamily protein (AHRD V3.3 *** AT3G21670.1)	AT3G21670	Major facilitator superfamily protein	shared
Solyc02g091080.2	Protein DETOXIFICATION (AHRD V3.3 *** K4BCQ7_SOLLC)	AT2G04040	MATE efflux family protein	shared
Solyc03g044790.3	methylesterase AY455313	AT2G23610	methyl esterase 3	shared
Solyc03g121920.3	Mitochondrial carrier protein (AHRD V3.3 *** F8WLA3_CITUN)	AT1G72820	Mitochondrial substrate carrier family protein	shared
Solyc06g066680.3	Mitochondrial carrier protein (AHRD V3.3 *** A0A0K9PC13_ZOSMR)	AT1G79900	Mitochondrial substrate carrier family protein	shared
Solyc01g087040.2	PsbP-like (AHRD V3.3 *** A0A0U9HL69_KLEFL)	AT3G63540	Mog1/PsbP/DUF1795-like photosystem II reaction center PsbP family protein	shared
Solyc04g079360.1	R2R3MYB transcription factor 77	AT3G50060	myb domain protein 77	shared
Solyc05g008235.1	MYB transcription factor (AHRD V3.3 *** W6JQG2_GENTR)	AT1G71030	MYB-like 2	shared
sly-MIR390a	NA	NA	NA	shared
Solyc00g005094.1	Glucose-6-phosphate 1-dehydrogenase 3, chloroplastic (AHRD V3.3 --* G6PD3_ARATH)	NA	NA	shared
Solyc00g022090.2	Formyltetrahydrofolate deformylase 1, mitochondrial (AHRD V3.3 --* PURU1_ARATH)	NA	NA	shared
Solyc01g009710.1	LOW QUALITY:PLAT/LH2 domain-containing lipoxygenase family protein (AHRD V3.3 --* AT1G72520.1)	NA	NA	shared
Solyc01g108700.3	LOW QUALITY:transcription initiation factor TFIID subunit 1b-like protein (AHRD V3.3 -** AT3G19030.1)	NA	NA	shared
Solyc01g108710.3	transcription initiation factor TFIID subunit 1b-like protein (AHRD V3.3 -** AT3G19030.1)	NA	NA	shared
Solyc02g068170.1	LOW QUALITY:CAP-gly domain linker (AHRD V3.3 --* AT3G55060.3)	NA	NA	shared
Solyc02g078665.1	Hydroxyproline-rich glycoprotein family protein, putative (AHRD V3.3 --* A0A072UP10_MEDTR)	NA	NA	shared
Solyc02g082330.1	LOW QUALITY:P-loop containing nucleoside triphosphate hydrolases superfamily protein (AHRD V3.3 --* AT1G12770.2)	NA	NA	shared
Solyc02g092890.1	LOW QUALITY:Transmembrane protein, putative (AHRD V3.3 -** A0A072UNU4_MEDTR)	NA	NA	shared
Solyc03g025960.1	LOW QUALITY:CLAVATA3/ESR (CLE)-related protein 2 (AHRD V3.3 -** CLE14_ARATH)	NA	NA	shared
Solyc03g098760.2	Kunitz-type protease inhibitor-like protein (AHRD V3.3 *** Q2XPY0_SOLTU)	NA	NA	shared
Solyc03g112120.2	Protein prune (AHRD V3.3 *** A0A1D1YXQ3_9ARAE)	NA	NA	shared
Solyc04g009870.1	Beta-carotene hydroxylase 2, chloroplastic (AHRD V3.3 --* BCH2_CAPAN)	NA	NA	shared
Solyc04g011735.1	methyl-CPG-binding domain 7 (AHRD V3.3 --* AT5G59800.1)	NA	NA	shared
Solyc04g011750.3	Protein TIC 214 (AHRD V3.3 --* TI214_VITVI)	NA	NA	shared
Solyc04g024430.3	DNA polymerase epsilon catalytic subunit (AHRD V3.3 --* AT1G08260.1)	NA	NA	shared
Solyc04g071590.3	Abscisic acid stress ripening 3%2C ASR3	NA	NA	shared
Solyc04g071600.3	Abscisic acid stress ripening 5	NA	NA	shared
Solyc04g072320.2	RNA polymerase I subunit 43 (AHRD V3.3 --* AT1G60620.2)	NA	NA	shared
Solyc04g072620.1	LOW QUALITY:sterile alpha motif (SAM) domain-containing protein (AHRD V3.3 --* AT2G45700.2)	NA	NA	shared
Solyc04g076730.1	LOW QUALITY:Transmembrane protein, putative (AHRD V3.3 *** G7JEX2_MEDTR)	NA	NA	shared
Solyc05g046270.3	Protein Ycf2 (AHRD V3.3 --* YCF2_OENGL)	NA	NA	shared
Solyc06g036770.1	LOW QUALITY:CASP-like protein (AHRD V3.3 --* A0A0L9UWM4_PHAAN)	NA	NA	shared
Solyc06g050140.1	LOW QUALITY:Plant regulator RWP-RK family protein (AHRD V3.3 --* AT2G17150.6)	NA	NA	shared
Solyc06g062420.3	transmembrane protein (AHRD V3.3 -** AT3G21351.1)	NA	NA	shared
Solyc06g082350.3	Biotin carboxyl carrier acetyl-CoA carboxylase (AHRD V3.3 --* G7KRK6_MEDTR)	NA	NA	shared
Solyc07g005300.1	LOW QUALITY:RING-finger, DEAD-like helicase, PHD and SNF2 domain-containing protein (AHRD V3.3 --* AT2G40770.3)	NA	NA	shared
Solyc07g007770.2	zinc finger WD40 repeat protein 1 (AHRD V3.3 --* AT4G25440.3)	NA	NA	shared
Solyc07g044970.1	LOW QUALITY:P-loop containing nucleoside triphosphate hydrolases superfamily protein (AHRD V3.3 --* AT2G16790.5),Pfam:PF13671	NA	NA	shared
Solyc07g054720.2	Type II proteinase inhibitor family protein (AHRD V3.3 -** B6SSS5_MAIZE)	NA	NA	shared
Solyc07g056080.1	LOW QUALITY:Acidic endochitinase SE2 (AHRD V3.3 --* CHIE_BETVU)	NA	NA	shared
Solyc08g023510.2	Serine incorporator 4 (AHRD V3.3 *** A0A1D1XYQ2_9ARAE)	NA	NA	shared
Solyc08g067640.1	LOW QUALITY:Zinc finger C-x8-C-x5-C-x3-H type family protein (AHRD V3.3 --* AT1G21580.8)	NA	NA	shared
Solyc09g008080.3	Ribosomal protein S5/Elongation factor G/III/V family protein (AHRD V3.3 --* AT1G56070.3)	NA	NA	shared
Solyc09g015030.1	LOW QUALITY:cation/H+ exchanger 18 (AHRD V3.3 --* AT5G41610.3)	NA	NA	shared
Solyc09g075840.3	adenosine-5'-phosphosulfate (APS) kinase 4 (AHRD V3.3 --* AT5G67520.3)	NA	NA	shared
Solyc09g098510.3	Extensin (Class I) (AHRD V3.3 *-* Q01945_SOLLC)	NA	NA	shared
Solyc10g006150.3	DUF4408 domain protein (AHRD V3.3 *** G7K8L0_MEDTR)	NA	NA	shared
Solyc10g006750.3	ABC-2 and Plant PDR ABC-type transporter family protein (AHRD V3.3 --* AT4G15233.8)	NA	NA	shared
Solyc10g039230.1	S-locus lectin protein kinase family protein (AHRD V3.3 --* AT1G61490.7)	NA	NA	shared
Solyc10g050510.1	LOW QUALITY:transcription initiation factor TFIID subunit 1b-like protein (AHRD V3.3 -** AT3G19030.1)	NA	NA	shared
Solyc10g050570.1	LOW QUALITY:hydrolases, acting on ester bond (AHRD V3.3 --* AT3G27325.3)	NA	NA	shared
Solyc10g051225.1	Leucine-rich receptor-like protein kinase family protein (AHRD V3.3 --* AT4G20270.1)	NA	NA	shared
Solyc10g051230.1	Leucine-rich repeat receptor-like protein kinase family protein (AHRD V3.3 --* AT4G26540.1)	NA	NA	shared
Solyc10g079780.1	Dolichyl-diphosphooligosaccharide--protein glycosyltransferase subunit DAD1 (AHRD V3.3 -** DAD1_ORYSI)	NA	NA	shared
Solyc10g080620.1	LOW QUALITY:NAD(P)H-quinone oxidoreductase subunit 2 A, chloroplastic (AHRD V3.3 --* NU2C1_HORVU)	NA	NA	shared
Solyc10g084070.1	LOW QUALITY:Endoglucanase (AHRD V3.3 --* A0A022RID5_ERYGU)	NA	NA	shared
Solyc11g005480.2	Citrate binding protein (AHRD V3.3 *** Q8H9C1_SOLTU)	NA	NA	shared
Solyc11g051125.1	Core-2/I-branching beta-1,6-N-acetylglucosaminyltransferase family protein (AHRD V3.3 --* AT5G14550.2)	NA	NA	shared
Solyc12g036310.1	LOW QUALITY:NAD(P)H-quinone oxidoreductase subunit 5, chloroplastic (AHRD V3.3 --* NU5C_CHLSC)	NA	NA	shared
Solyc12g040470.2	non-specific phospholipase C2 (AHRD V3.3 --* AT2G26870.1)	NA	NA	shared
Solyc12g088870.1	PHD finger transcription factor (AHRD V3.3 --* AT5G58610.9)	NA	NA	shared
Solyc12g094615.1	Ring/U-Box superfamily protein (AHRD V3.3 --* AT2G27950.3)	NA	NA	shared
Solyc12g096210.2	F-box/RNI-like superfamily protein (AHRD V3.3 --* AT1G06630.9)	NA	NA	shared
Solyc12g096960.2	Major allergen d 1 (AHRD V3.3 *** Q8L6K9_MALDO)	NA	NA	shared
Solyc12g098757.1	Extensin-like protein (AHRD V3.3 *-* Q7DLZ6_VIGUN)	NA	NA	shared
Solyc07g066330.3	NAC domain-containing protein (AHRD V3.3 *** W0C8Y8_9FABA)	AT1G56010	NAC domain containing protein 1	shared
Solyc10g083170.2	NAD(P)-binding Rossmann-fold superfamily protein (AHRD V3.3 *** AT1G52340.1),Pfam:PF13561	AT1G52340	NAD(P)-binding Rossmann-fold superfamily protein	shared
Solyc12g045030.2	NAD(P)-binding Rossmann-fold superfamily protein (AHRD V3.3 *** AT3G55310.1)	AT3G55310	NAD(P)-binding Rossmann-fold superfamily protein	shared
Solyc09g097960.3	NAD(P)-linked oxidoreductase superfamily protein (AHRD V3.3 *** AT1G60710.1)	AT1G60710	NAD(P)-linked oxidoreductase superfamily protein	shared
Solyc11g067250.2	Poly [ADP-ribose] polymerase (AHRD V3.3 *** K4D9Y2_SOLLC)	AT5G22470	NAD+ ADP-ribosyltransferases;NAD+ ADP-ribosyltransferases	shared
Solyc05g007630.3	Late blight resistance protein, putative (AHRD V3.3 *** Q6L421_SOLDE)	AT1G50180	NB-ARC domain-containing disease resistance protein	shared
Solyc06g064720.1	Disease resistance protein (NBS-LRR class) family (AHRD V3.3 *-* AT5G40060.1)	AT3G46530	NB-ARC domain-containing disease resistance protein	shared
Solyc06g072620.3	Bidirectional sugar transporter SWEET (AHRD V3.3 *-* K4C8Y2_SOLLC)	AT3G48740	Nodulin MtN3 family protein	shared
Solyc09g014940.2	Wound-induced protein 1 (AHRD V3.3 *** A0A0B2R5F9_GLYSO)	AT5G01740	Nuclear transport factor 2 (NTF2) family protein	shared
Solyc03g094120.3	Glycosyltransferase (AHRD V3.3 *** A0A164WZ41_DAUCA)	AT1G28710	Nucleotide-diphospho-sugar transferase family protein	shared
Solyc08g078650.3	Nucleotide-diphospho-sugar transferases superfamily protein (AHRD V3.3 *** AT2G35710.1)	AT2G35710	Nucleotide-diphospho-sugar transferases superfamily protein	shared
Solyc11g007970.2	4-coumarate--CoA ligase like (AHRD V3.3 *** A0A0K9P263_ZOSMR)	AT1G20510	OPC-8:0 CoA ligase1	shared
Solyc08g080640.2	Osmotin-like protein (Fragment) IPR017949 Thaumatin, conserved site IPR001938	AT4G11650	osmotin 34	shared
Solyc08g080670.1	Pathogenesis-related 5-like protein	AT4G11650	osmotin 34	shared
Solyc01g007810.1	LOW QUALITY:ovate family protein 3	AT5G04820	ovate family protein 13	shared
Solyc03g031890.3	Oxidative stress 3, putative isoform 2 (AHRD V3.3 *** A0A061GIQ6_THECC)	AT5G56550	oxidative stress 3	shared
Solyc06g066420.3	Oxidative stress 3, putative isoform 1 (AHRD V3.3 *** A0A061GC09_THECC)	AT5G56550	oxidative stress 3	shared
Solyc07g066180.2	Tir-nbs resistance protein (AHRD V3.3 *** A0A061F4L1_THECC)	AT5G56220	P-loop containing nucleoside triphosphate hydrolases superfamily protein	shared
Solyc05g056030.3	Patatin (AHRD V3.3 *** K4C2S8_SOLLC)	AT2G39220	PATATIN-like protein 6	shared
Solyc04g064880.3	Pathogen-related protein (AHRD V3.3 *** A0A1D1XC89_9ARAE)	AT1G78780	pathogenesis-related family protein	shared
Solyc10g084840.2	Pathogenesis-related thaumatin family protein (AHRD V3.3 *** A0A072TZL3_MEDTR)	AT5G02140	Pathogenesis-related thaumatin superfamily protein	shared
Solyc11g008640.1	Flowering locus T (AHRD V3.3 *** D5LM18_PETHY)	AT1G65480	PEBP (phosphatidylethanolamine-binding protein) family protein	shared
Solyc01g095690.2	Pentatricopeptide repeat-containing protein, putative (AHRD V3.3 *** A0A061DSI9_THECC)	AT4G01030	pentatricopeptide (PPR) repeat-containing protein	shared
Solyc11g064750.2	Pentatricopeptide repeat-containing family protein (AHRD V3.3 *** B9H819_POPTR)	AT2G42920	Pentatricopeptide repeat (PPR-like) superfamily protein	shared
Solyc12g008550.2	Peptidase M28 family protein (AHRD V3.3 *-* AT5G19740.1)	AT5G19740	Peptidase M28 family protein	shared
Solyc02g079500.4	Peroxidase (AHRD V1 **** Q50LG4_TOBAC)%3B contains Interpro domain(s) IPR019793 Peroxidases heam-ligand binding site IPR019794 Peroxidase%2C active site IPR002016 Haem peroxidase%2C plant/fungal/bacterial	AT5G05340	Peroxidase superfamily protein	shared
Solyc02g094180.3	Peroxidase (AHRD V3.3 *** K4BDL3_SOLLC)	AT4G37530	Peroxidase superfamily protein	shared
Solyc07g055190.3	Peroxidase (AHRD V3.3 *** K4CG58_SOLLC)	AT5G05340	Peroxidase superfamily protein	shared
Solyc11g018775.1	Peroxidase (AHRD V3.3 *** M1CN26_SOLTU)	AT1G14550	Peroxidase superfamily protein	shared
Solyc11g018777.1	Peroxidase (AHRD V3.3 *** K4D6T3_SOLLC)	AT1G14550	Peroxidase superfamily protein	shared
Solyc11g018800.2	Peroxidase (AHRD V3.3 *** K4D6T3_SOLLC)	AT1G14550	Peroxidase superfamily protein	shared
Solyc00g282510.2	Phenylalanine ammonia-lyase (AHRD V3.3 *** PAL1_TOBAC)	AT2G37040	PHE ammonia lyase 1	shared
Solyc10g011920.2	Phenylalanine ammonia-lyase (AHRD V3.3 *** A0A124SBF6_CYNCS)	AT2G37040	PHE ammonia lyase 1	shared
Solyc01g091700.3	F-box family protein (AHRD V3.3 *** B9IC61_POPTR)	AT3G61060	phloem protein 2-A13	shared
Solyc10g017960.2	F-box protein PP2-A13 (AHRD V3.3 *** P2A13_ARATH)	AT3G61060	phloem protein 2-A13	shared
Solyc06g034290.3	Glycerol-3-phosphate transporter, putative (AHRD V3.3 *** B9R9S6_RICCO)	AT3G47420	phosphate starvation-induced gene 3	shared
Solyc09g090070.1	phosphate transporter 1	AT2G38940	phosphate transporter 1;4	shared
Solyc04g074400.1	Phosphate-responsive 1 family protein, putative (AHRD V3.3 *** A0A061FGC9_THECC)	AT4G08950	Phosphate-responsive 1 family protein	shared
Solyc04g074440.1	Phosphate-responsive 1 family protein (AHRD V3.3 *** A0A061FGW0_THECC)	AT4G08950	Phosphate-responsive 1 family protein	shared
Solyc04g074450.1	Phosphate-responsive 1 family protein (AHRD V3.3 *** AT4G08950.1)	AT4G08950	Phosphate-responsive 1 family protein	shared
Solyc07g043130.3	Phototropic-responsive NPH3 family protein (AHRD V3.3 *** AT2G30520.1)	AT2G30520	Phototropic-responsive NPH3 family protein	shared
Solyc06g066590.3	Plant cadmium resistance 2 (AHRD V3.3 *** A0A0K9NVT8_ZOSMR)	AT1G52200	PLAC8 family protein	shared
Solyc01g005470.3	PLANT CADMIUM RESISTANCE 2 (AHRD V3.3 *** AT1G14870.1)	AT1G14870	PLANT CADMIUM RESISTANCE 2	shared
Solyc12g017480.2	Leucine-rich repeat-containing protein (AHRD V3.3 *** A0A118K791_CYNCS)	AT2G19330	plant intracellular ras group-related LRR 6	shared
Solyc09g075330.3	Pectinesterase (AHRD V3.3 *** K4CVB0_SOLLC)	AT1G02810	Plant invertase/pectin methylesterase inhibitor superfamily	shared
Solyc03g083730.1	Plant invertase/pectin methylesterase inhibitor superfamily protein (AHRD V3.3 *** AT5G62360.1)	AT5G62360	Plant invertase/pectin methylesterase inhibitor superfamily protein	shared
Solyc05g054750.3	Plant protein 1589 of unknown function (AHRD V3.3 *** AT3G55240.1)	AT3G55240	Plant protein 1589 of unknown function	shared
Solyc12g094610.2	U-box domain-containing 15-like protein (AHRD V3.3 *** A0A0B0PZ68_GOSAR)	AT5G42340	Plant U-Box 15	shared
Solyc05g055990.3	plasma membrane intrinsic protein 2.12	AT3G53420	plasma membrane intrinsic protein 2A	shared
Solyc05g053600.3	Pleiotropic drug resistance ABC transporter (AHRD V3.3 *** W0TUG3_ACAMN)	AT1G15520	pleiotropic drug resistance 12	shared
Solyc05g053610.2	Pleiotropic drug resistance ABC transporter (AHRD V3.3 *** W0TUG3_ACAMN)	AT1G15520	pleiotropic drug resistance 12	shared
Solyc09g091670.3	Pleiotropic drug resistance ABC transporter (AHRD V3.3 *** W0TUG3_ACAMN)	AT1G15520	pleiotropic drug resistance 12	shared
Solyc06g073165.1	LOW QUALITY:BURP domain-containing protein (AHRD V3.3 *-* AT1G23760.1)	AT1G70370	polygalacturonase 2	shared
Solyc08g076960.1	Abscisic acid receptor PYL1 (AHRD V3.3 *** M1BH64_SOLTU)	AT4G17870	Polyketide cyclase/dehydrase and lipid transport superfamily protein	shared
Solyc04g076220.3	AT hook motif DNA-binding family protein (AHRD V3.3 *** G7J554_MEDTR)	AT5G49700	Predicted AT-hook DNA-binding family protein	shared
Solyc12g087950.1	AT hook motif DNA-binding family protein (AHRD V3.3 *** G7J554_MEDTR)	AT5G49700	Predicted AT-hook DNA-binding family protein	shared
Solyc12g088040.2	Kinase, putative (AHRD V3.3 *** A0A061FTR2_THECC)	AT5G02070	Protein kinase family protein	shared
Solyc03g083470.3	Receptor-like kinase (AHRD V3.3 *** A0A072VF58_MEDTR)	AT1G66920	Protein kinase superfamily protein	shared
Solyc03g083480.3	Membrane receptor-like protein 1 (AHRD V3.3 *** B3TJG2_CAPAN)	AT5G38260	Protein kinase superfamily protein	shared
Solyc06g060510.2	LOW QUALITY:Plant/F17O14-7 protein (AHRD V3.3 *** G7KY86_MEDTR)	AT3G08600	Protein of unknown function (DUF1191)	shared
Solyc03g083490.3	DUF1442 family protein (AHRD V3.3 *** B7FH79_MEDTR)	AT5G62280	Protein of unknown function (DUF1442)	shared
Solyc02g067050.3	UPF0301 protein (AHRD V3.3 *** A0A0B2NUC1_GLYSO)	AT3G29240	Protein of unknown function (DUF179)	shared
Solyc06g008990.1	LOW QUALITY:Fantastic four-like protein (AHRD V3.3 *-* G7IE53_MEDTR)	AT4G02810	Protein of unknown function (DUF3049)	shared
Solyc02g078150.3	DUF506 family protein (AHRD V3.3 *** G7IPT8_MEDTR)	AT4G32480	Protein of unknown function (DUF506)	shared
Solyc02g078160.3	DUF506 family protein (AHRD V3.3 *** G7IPT8_MEDTR)	AT4G32480	Protein of unknown function (DUF506)	shared
Solyc06g007580.1	LOW QUALITY:DUF506 family protein (AHRD V3.3 *** G7LF52_MEDTR)	AT3G07350	Protein of unknown function (DUF506)	shared
Solyc09g014820.3	LURP-one-like protein (AHRD V3.3 *** G7KW19_MEDTR)	AT5G01750	Protein of unknown function (DUF567)	shared
Solyc03g123460.3	DUF581 family protein (AHRD V3.3 *-* G7L953_MEDTR)	AT1G53903	Protein of unknown function (DUF581)	shared
Solyc06g082780.3	Calcium uniporter, mitochondrial (AHRD V3.3 *** A0A0B0N729_GOSAR)	AT1G09575	Protein of unknown function (DUF607)	shared
Solyc09g057580.3	UV-B-induced protein, chloroplastic (AHRD V3.3 *** A0A199VW76_ANACO)	AT3G07310	Protein of unknown function (DUF760)	shared
Solyc08g065320.3	green ripe-like 1	AT2G26070	Protein of unknown function (DUF778)	shared
Solyc11g010360.2	MIZU-KUSSEI-like protein (Protein of unknown function, DUF617) (AHRD V3.3 *** AT5G65340.1)	AT5G65340	Protein of unknown function, DUF617	shared
Solyc10g084410.2	Protein phosphatase 2C family protein (AHRD V3.3 *** AT3G12620.2)	AT3G12620	Protein phosphatase 2C family protein	shared
Solyc12g013710.2	light dependent NADH:protochlorophyllide oxidoreductase 1	AT5G54190	protochlorophyllide oxidoreductase A	shared
Solyc04g074870.3	Purine permease-like protein (AHRD V3.3 *** G7J4H5_MEDTR)	AT1G28230	purine permease 1	shared
Solyc08g077370.3	Purine permease (AHRD V3.3 *** G7IK92_MEDTR)	AT1G44750	purine permease 11	shared
Solyc06g050500.2	Abscisic acid receptor (AHRD V3.3 *** G7KT83_MEDTR)	AT2G38310	PYR1-like 4	shared
Solyc05g052420.2	Abscisic acid receptor (AHRD V3.3 *** G7JKP6_MEDTR)	AT2G40330	PYR1-like 6	shared
Solyc10g005320.3	Tryptophan synthase (AHRD V3.3 *** K4CX65_SOLLC)	AT5G28237	Pyridoxal-5'-phosphate-dependent enzyme family protein	shared
Solyc06g051560.3	Flavoprotein wrbA (AHRD V3.3 *-* A0A1D1ZBK1_9ARAE)	AT4G27270	Quinone reductase family protein	shared
Solyc06g076450.3	Ras-related protein, expressed (AHRD V3.3 *** D8L9F8_WHEAT)	AT1G07410	RAB GTPase homolog A2B	shared
Solyc11g011180.2	Leucine-rich receptor-like kinase family protein, putative (AHRD V3.3 *** G7JP58_MEDTR)	AT1G74190	receptor like protein 15	shared
Solyc10g076500.2	Leucine-rich-repeat receptor-like protein (AHRD V3.3 *** A0A0D4WVW2_GOSBA)	AT2G33060	receptor like protein 27	shared
Solyc12g009770.1	LOW QUALITY:Leucine-rich-repeat receptor-like protein (AHRD V3.3 *** A0A097BR55_GOSBA)	AT3G11010	receptor like protein 34	shared
Solyc01g009930.2	Leucine-rich repeat receptor-like protein kinase family protein (AHRD V3.3 *-* AT4G08850.2)	AT3G11080	receptor like protein 35	shared
Solyc12g009740.2	Leucine-rich repeat receptor-like protein kinase family protein (AHRD V3.3 *-* AT3G24240.1)	AT3G11080	receptor like protein 35	shared
Solyc12g009520.2	Leucine-rich-repeat receptor-like protein (AHRD V3.3 *** A0A0D4WVW2_GOSBA)	AT1G45616	receptor like protein 6	shared
Solyc12g009780.1	LOW QUALITY:Leucine-rich-repeat receptor-like protein (AHRD V3.3 *** A0A0D4WVW2_GOSBA)	AT1G45616	receptor like protein 6	shared
Solyc12g036793.1	Leucine-rich repeat receptor-like protein kinase family protein (AHRD V3.3 *-* AT4G08850.1)	AT1G45616	receptor like protein 6	shared
Solyc01g067020.3	Atypical receptor-like kinase 1 (AHRD V3.3 *** C5H8K0_SOLLC)	AT1G48480	receptor-like kinase 1	shared
Solyc08g082460.3	Kinase (AHRD V3.3 *-* A0A059Q131_9POAL)	AT1G48480	receptor-like kinase 1	shared
Solyc09g075910.1	Serine/threonine-protein kinase (AHRD V3.3 *** K4CVG8_SOLLC)	AT5G60900	receptor-like protein kinase 1	shared
Solyc09g075920.1	Serine/threonine-protein kinase (AHRD V3.3 *** K4CVG9_SOLLC)	AT5G60900	receptor-like protein kinase 1	shared
Solyc09g057960.1	Cysteine-rich RLK (Receptor-like kinase) protein (AHRD V3.3 *** G7KY09_MEDTR)	AT5G48540	receptor-like protein kinase-related family protein	shared
Solyc04g007000.1	AP2/B3 transcription factor family protein (AHRD V3.3 *** AT1G25560.1)	AT1G13260	related to ABI3/VP1 1	shared
Solyc12g056980.1	Ethylene-responsive element binding-factor (AHRD V3.3 *** K9UTK3_JATCU)	AT1G78080	related to AP2 4	shared
Solyc05g007950.3	LERNALE L.esculentum ribonuclease le	AT2G02990	ribonuclease 1	shared
Solyc10g008400.1	RING/U-box superfamily protein (AHRD V3.3 *-* AT1G74990.1)	AT4G03510	RING membrane-anchor 1	shared
Solyc03g031830.1	RING/U-box superfamily protein (AHRD V3.3 *** AT4G03965.1)	AT4G03965	RING/U-box superfamily protein	shared
Solyc11g005280.1	RING/U-box superfamily protein (AHRD V3.3 *** AT1G49230.1)	AT1G49230	RING/U-box superfamily protein	shared
Solyc11g006450.2	RING/U-box superfamily protein (AHRD V3.3 *** A0A061FQW5_THECC)	AT2G35910	RING/U-box superfamily protein	shared
Solyc03g044210.3	Vicilin-like protein (AHRD V3.3 *** A0A0S3B0K0_COCNU)	AT2G28490	RmlC-like cupins superfamily protein	shared
Solyc03g113580.1	Germin-like protein (AHRD V3.3 *** Q8H2A6_ANACO)	AT1G18980	RmlC-like cupins superfamily protein	shared
Solyc11g006730.1	Germin-like protein 1 (AHRD V3.3 *** B9HVV6_POPTR)	AT1G18980	RmlC-like cupins superfamily protein	shared
Solyc12g010900.1	F-box protein (AHRD V3.3 *** T1RVG4_STRHE)	AT2G42620	RNI-like superfamily protein	shared
Solyc02g092580.3	Peroxidase (AHRD V3.3 *** K4BD54_SOLLC)	AT5G67400	root hair specific 19	shared
Solyc07g055410.2	Serine/threonine-protein kinase (AHRD V3.3 *-* A0A0D4BT35_SOLPN)	AT4G32300	S-domain-2 5	shared
Solyc09g011330.2	Serine/threonine-protein kinase (AHRD V3.3 *** M1C8X1_SOLTU)	AT2G19130	S-locus lectin protein kinase family protein	shared
Solyc12g088390.1	Zinc-finger protein (AHRD V3.3 *** Q40899_PETHY)	AT1G27730	salt tolerance zinc finger	shared
Solyc01g110770.2	Small auxin up-regulated RNA11	AT5G18030	SAUR-like auxin-responsive protein family	shared
Solyc01g110780.1	SAUR-like auxin-responsive protein family (AHRD V3.3 *** AT4G38840.1)	AT4G38840	SAUR-like auxin-responsive protein family	shared
Solyc01g110800.3	Small auxin up-regulated RNA19	AT4G38840	SAUR-like auxin-responsive protein family	shared
Solyc04g053030.1	SAUR-like auxin-responsive protein family, putative (AHRD V3.3 *** A0A061E5G9_THECC)	AT1G29500	SAUR-like auxin-responsive protein family	shared
Solyc06g053260.1	SAUR-like auxin-responsive family protein (AHRD V3.3 *** G7J880_MEDTR)	AT4G00880	SAUR-like auxin-responsive protein family	shared
Solyc10g018340.1	Small auxin up-regulated RNA71	AT2G45210	SAUR-like auxin-responsive protein family	shared
Solyc11g011630.2	SAUR-like auxin-responsive protein family, putative (AHRD V3.3 *** A0A061E5G9_THECC)	AT1G29500	SAUR-like auxin-responsive protein family	shared
Solyc11g011670.1	SAUR-like auxin-responsive protein family, putative (AHRD V3.3 *** A0A061E5G9_THECC)	AT1G29500	SAUR-like auxin-responsive protein family	shared
Solyc11g011680.1	SAUR-like auxin-responsive protein family (AHRD V3.3 *** AT5G18030.1)	AT5G18030	SAUR-like auxin-responsive protein family	shared
Solyc11g011690.1	SAUR-like auxin-responsive protein family, putative (AHRD V3.3 *** A0A061E5G9_THECC)	AT1G29500	SAUR-like auxin-responsive protein family	shared
Solyc11g011700.1	SAUR-like auxin-responsive protein family (AHRD V3.3 *** AT2G21210.2)	AT5G18030	SAUR-like auxin-responsive protein family	shared
Solyc11g011710.1	Small auxin up-regulated RNA95	AT1G29500	SAUR-like auxin-responsive protein family	shared
Solyc11g011720.1	SAUR-like auxin-responsive protein family (AHRD V3.3 *** AT5G18030.1)	AT5G18030	SAUR-like auxin-responsive protein family	shared
Solyc02g076910.3	Cysteine protease (AHRD V3.3 *** E7D4U5_TOBAC)	AT5G45890	senescence-associated gene 12	shared
Solyc06g009140.3	Late embryogenesis abundant protein (AHRD V3.3 *** E3W6T3_SESPO)	AT4G02380	senescence-associated gene 21	shared
Solyc04g079470.3	Serpin-like protein (AHRD V3.3 *** Q8GT65_CITPA)	AT1G47710	Serine protease inhibitor (SERPIN) family protein	shared
Solyc12g009880.1	LOW QUALITY:Serine-rich protein-related (AHRD V3.3 *** A0A061GN42_THECC)	AT5G11090	serine-rich protein-related	shared
Solyc06g068010.3	Biotin carboxyl carrier protein (AHRD V3.3 *** A0A0H5BV69_PEA)	AT3G15690	Single hybrid motif superfamily protein	shared
Solyc11g008820.2	Endoglucanase (AHRD V3.3 *** A0A0V0II53_SOLCH)	AT1G65610	Six-hairpin glycosidases superfamily protein	shared
Solyc12g056920.2	Sulfate transporter, putative (AHRD V3.3 *** B9RJF7_RICCO)	AT5G10180	slufate transporter 2;1	shared
Solyc01g010770.3	Hypersensitive-induced response protein (AHRD V3.3 *** Q6UNT3_CUCSA)	AT5G62740	SPFH/Band 7/PHB domain-containing membrane-associated protein family	shared
Solyc01g087840.3	Subtilisin-like protease (AHRD V3.3 *** O82006_SOLLC)	AT2G05920	Subtilase family protein	shared
Solyc02g071560.3	Subtilisin-like protease (AHRD V3.3 *** A0A0B0Q303_GOSAR)	AT5G45650	subtilase family protein	shared
Solyc08g079900.3	subtilisin-like protease	AT5G67360	Subtilase family protein	shared
Solyc08g079930.2	subtilisin-like protease	AT5G67360	Subtilase family protein	shared
Solyc08g079980.1	Subtilisin-like protease (AHRD V3.3 *** Q9LWA3_SOLLC)	AT5G67360	Subtilase family protein	shared
Solyc01g087800.2	LOW QUALITY:Subtilisin-like protease (AHRD V3.3 *** O82777_SOLLC)	AT5G67090	Subtilisin-like serine endopeptidase family protein	shared
Solyc01g087810.2	subtilisin-like serine protease family protein	AT5G67090	Subtilisin-like serine endopeptidase family protein	shared
Solyc02g078620.1	Dof zinc finger protein (AHRD V3.3 *** W9RD26_9ROSA)	AT5G60200	TARGET OF MONOPTEROS 6	shared
Solyc09g008030.1	TCP transcription factor 19	AT2G37000	TCP family transcription factor	shared
Solyc11g020670.1	TCP transcription factor 12	AT1G35560	TCP family transcription factor	shared
Solyc02g094290.1	TCP transcription factor 27	AT3G27010	TEOSINTE BRANCHED 1, cycloidea, PCF (TCP)-domain family protein 20	shared
Solyc03g116320.3	TCP transcription factor 16	AT3G47620	TEOSINTE BRANCHED, cycloidea and PCF (TCP) 14	shared
Solyc03g114480.3	Tetraspanin family protein (AHRD V3.3 *** A0A072V357_MEDTR)	AT2G23810	tetraspanin8	shared
Solyc01g067460.2	Glutaredoxin family protein (AHRD V3.3 *** D7MAE7_ARALL)	AT4G15700	Thioredoxin superfamily protein	shared
Solyc04g011830.1	Glutaredoxin (AHRD V3.3 *** A0A103Y7J3_CYNCS)	AT1G03020	Thioredoxin superfamily protein	shared
Solyc06g008750.1	Glutaredoxin (AHRD V3.3 *** E9NZT9_PHAVU)	AT3G62950	Thioredoxin superfamily protein	shared
Solyc06g054570.1	Glutaredoxin family protein (AHRD V3.3 *** D7LYE9_ARALL)	AT5G18600	Thioredoxin superfamily protein	shared
Solyc06g008620.1	LOW QUALITY:tolB protein-like protein (AHRD V3.3 *** AT4G01870.2)	AT4G01870	tolB protein-related	shared
Solyc02g072150.3	Trehalose-6-phosphate synthase, putative (AHRD V3.3 *** B9S8D6_RICCO)	AT1G06410	trehalose-phosphatase/synthase 7	shared
Solyc01g095610.3	protein trichome birefringence-like 25	AT1G01430	TRICHOME BIREFRINGENCE-LIKE 25	shared
Solyc10g009590.3	Trichome birefringence-like protein (AHRD V3.3 *-* A0A072TUJ8_MEDTR)	AT1G01430	TRICHOME BIREFRINGENCE-LIKE 25	shared
Solyc07g062220.3	Trichome birefringence-like protein (AHRD V3.3 *** G7IKB9_MEDTR)	AT3G14850	TRICHOME BIREFRINGENCE-LIKE 41	shared
Solyc09g065770.1	LOW QUALITY:Ubiquitin-conjugating enzyme/RWD-like protein, putative (AHRD V3.3 *** A0A061DQB8_THECC)	AT2G38830	Ubiquitin-conjugating enzyme/RWD-like protein	shared
Solyc01g005210.3	Trehalose-phosphate synthase 6 (AHRD V3.3 *** W8Q024_CAMSI)	AT1G68020	UDP-Glycosyltransferase / trehalose-phosphatase family protein	shared
Solyc02g091370.2	Glycosyltransferase (AHRD V3.3 *** K4BCT5_SOLLC)	AT1G22400	UDP-Glycosyltransferase superfamily protein	shared
Solyc04g014990.2	Glycosyltransferase (AHRD V3.3 *** K4BNY7_SOLLC)	AT2G36770	UDP-Glycosyltransferase superfamily protein	shared
Solyc04g016190.1	Glycosyltransferase (AHRD V3.3 *** K4BQB9_SOLLC)	AT2G36770	UDP-Glycosyltransferase superfamily protein	shared
Solyc07g043150.1	Glycosyltransferase (AHRD V3.3 *** K4CEH5_SOLLC)	AT3G21760	UDP-Glycosyltransferase superfamily protein	shared
Solyc11g007500.2	Glycosyltransferase (AHRD V3.3 *** M1BPV9_SOLTU)	AT5G49690	UDP-Glycosyltransferase superfamily protein	shared
Solyc12g096870.1	Glycosyltransferase (AHRD V3.3 *** Q0PI14_VITLA)	AT4G15480	UDP-Glycosyltransferase superfamily protein	shared
Solyc02g031990.1	LOW QUALITY:VQ motif-containing protein, putative (AHRD V3.3 *-* A0A061DVP3_THECC)	AT4G39720	VQ motif-containing protein	shared
Solyc02g068470.1	LOW QUALITY:VQ motif-containing protein, putative (AHRD V3.3 *-* A0A061DVP3_THECC)	AT4G39720	VQ motif-containing protein	shared
Solyc07g056600.1	VQ motif-containing protein (AHRD V3.3 *** AT1G78410.2)	AT1G78410	VQ motif-containing protein	shared
Solyc09g008750.1	VQ motif-containing protein, putative (AHRD V3.3 *** A0A061DH87_THECC)	AT4G37710	VQ motif-containing protein	shared
Solyc09g008760.1	VQ motif-containing protein (AHRD V3.3 *-* AT4G37710.2)	AT4G37710	VQ motif-containing protein	shared
Solyc12g042730.1	LOW QUALITY:VQ motif-containing protein (AHRD V3.3 *** AT1G80450.1)	AT1G80450	VQ motif-containing protein	shared
Solyc09g014720.2	Kinase, putative (AHRD V3.3 *** B9RE26_RICCO)	AT1G21270	wall-associated kinase 2	shared
Solyc02g079240.1	LOW QUALITY:Wound-responsive family protein (AHRD V3.3 --* AT4G10265.1)	AT4G05070	Wound-responsive family protein	shared
Solyc07g054730.1	LOW QUALITY:Wound-responsive family protein, putative (AHRD V3.3 *** A0A061E4N2_THECC)	AT4G28240	Wound-responsive family protein	shared
Solyc07g054780.1	LOW QUALITY:Wound-responsive family protein (AHRD V3.3 *** AT4G10265.1)	AT4G10265	Wound-responsive family protein	shared
Solyc09g092520.3	xyloglucan endotransglycosylase	AT3G23730	xyloglucan endotransglucosylase/hydrolase 16	shared
Solyc05g046290.3	Xyloglucan endotransglucosylase/hydrolase (AHRD V3.3 *** K4C0W2_SOLLC)	AT4G25810	xyloglucan endotransglycosylase 6	shared
Solyc05g018050.1	LOW QUALITY:RING/U-box superfamily protein (AHRD V3.3 *-* AT3G60080.1)	AT5G59550	zinc finger (C3HC4-type RING finger) family protein	shared
Solyc08g065940.3	Zinc finger CCCH domain-containing protein (AHRD V3.3 *** R4QQJ8_CUCME)	AT4G29190	Zinc finger C-x8-C-x5-C-x3-H type family protein	shared
Solyc03g113890.1	LOW QUALITY:Zinc finger family protein (AHRD V3.3 *-* B9HJ48_POPTR)	AT1G67030	zinc finger protein 6	shared
Solyc00g217960.1	LOW QUALITY:RING/U-box superfamily protein (AHRD V3.3 *-* AT1G49200.1)	AT3G14320	Zinc finger, C3HC4 type (RING finger) family protein	shared
Solyc02g033060.3	TSA: Wollemia nobilis Ref_Wollemi_Transcript_5463_1093 transcribed RNA sequence (AHRD V3.3 *** A0A0C9RPH1_9SPER)	AT3G10405	0	uniq in slsdg33
Solyc03g115160.3	RING/FYVE/PHD zinc finger protein, putative (AHRD V3.3 *-* G7IWF3_MEDTR)	AT5G61120	0	uniq in slsdg33
Solyc03g118630.3	transmembrane protein (AHRD V3.3 *** AT3G17950.1)	AT3G17950	0	uniq in slsdg33
Solyc03g119810.1	LOW QUALITY:Transmembrane protein, putative (AHRD V3.3 *** G7JT03_MEDTR)	AT1G49000	0	uniq in slsdg33
Solyc04g007250.1	LOW QUALITY:Transmembrane protein, putative (AHRD V3.3 *** G7K1J5_MEDTR)	AT1G68440	0	uniq in slsdg33
Solyc04g080540.2	DNA polymerase epsilon catalytic subunit A, putative (AHRD V3.3 *** A0A061FCM9_THECC)	AT1G19530	0	uniq in slsdg33
Solyc05g009300.1	LOW QUALITY:transmembrane protein (AHRD V3.3 *-* AT2G29180.1)	AT2G29180	0	uniq in slsdg33
Solyc05g052890.3	Cytochrome f (AHRD V3.3 --* CYF_PINTH)	AT5G02020	0	uniq in slsdg33
Solyc05g053050.1	LOW QUALITY:cyclin-dependent kinase inhibitor (AHRD V3.3 *** AT5G02220.1)	AT5G02220	0	uniq in slsdg33
Solyc08g082000.3	Homeobox-leucine zipper HOX24 (AHRD V3.3 *-* A0A0B0P867_GOSAR)	AT5G53220	0	uniq in slsdg33
Solyc12g010430.1	LOW QUALITY:NHL domain protein (AHRD V3.3 --* AT3G01430.1)	AT5G35090	0	uniq in slsdg33
Solyc02g091990.3	1-aminocyclopropane-1-carboxylate synthase 3	AT4G37770	1-amino-cyclopropane-1-carboxylate synthase 8	uniq in slsdg33
Solyc04g081340.3	HVA22-like protein (AHRD V3.3 *** M0ZWH6_SOLTU)	AT5G42560	Abscisic acid-responsive (TB2/DP1, HVA22) family protein	uniq in slsdg33
Solyc01g111880.3	MAP kinase kinase kinase 11	AT4G38470	ACT-like protein tyrosine kinase family protein	uniq in slsdg33
Solyc07g052700.3	AGAMOUS-like MADS-box transcription factor (AHRD V3.3 *** B2ZX81_CRYJA)	AT1G77980	AGAMOUS-like 66	uniq in slsdg33
Solyc12g019740.2	Thioredoxin, putative (AHRD V3.3 *** B9SHJ2_RICCO)	AT1G08570	atypical CYS HIS rich thioredoxin 4	uniq in slsdg33
Solyc01g110180.3	B-box zinc finger family protein (AHRD V3.3 *** AT4G39070.1)	AT4G39070	B-box zinc finger family protein	uniq in slsdg33
Solyc10g074440.2	Chitinase (AHRD V3.3 *** B9VRK7_CAPAN)	AT3G12500	basic chitinase	uniq in slsdg33
Solyc01g107961.1	Basic helix-loop-helix transcription factor (AHRD V3.3 *** A0A0H3YC60_SALMI)	AT1G49770	basic helix-loop-helix (bHLH) DNA-binding superfamily protein	uniq in slsdg33
Solyc09g089870.3	bHLH transcription factor 061	AT4G14410	basic helix-loop-helix (bHLH) DNA-binding superfamily protein	uniq in slsdg33
Solyc03g121540.3	beta-galactosidase 3	AT3G13750	beta galactosidase 1	uniq in slsdg33
Solyc03g121900.1	Bifunctional inhibitor/lipid-transfer protein/seed storage 2S albumin superfamily protein (AHRD V3.3 *** AT5G48490.1)	AT5G48490	Bifunctional inhibitor/lipid-transfer protein/seed storage 2S albumin superfamily protein	uniq in slsdg33
Solyc02g067220.3	EF hand calcium-binding family protein (AHRD V3.3 *-* G7L207_MEDTR)	AT3G29000	Calcium-binding EF-hand family protein	uniq in slsdg33
Solyc11g006710.2	Cationic amino acid transporter, putative (AHRD V3.3 *** B9RPW6_RICCO)	AT5G04770	cationic amino acid transporter 6	uniq in slsdg33
Solyc12g006620.2	Zinc finger transcription factor 72	AT2G02160	CCCH-type zinc finger family protein	uniq in slsdg33
Solyc02g070970.1	Chlorophyll a-b binding protein, chloroplastic (AHRD V3.3 *** Q41422_SOLTU)	AT1G29930	chlorophyll A/B binding protein 1	uniq in slsdg33
Solyc02g070980.1	Chlorophyll a-b binding protein, chloroplastic (AHRD V3.3 *** K4B876_SOLLC)	AT1G29930	chlorophyll A/B binding protein 1	uniq in slsdg33
Solyc02g087400.1	Ankyrin repeat-containing protein (AHRD V3.3 *** A0A103XGS2_CYNCS)	AT2G47450	chloroplast signal recognition particle component (CAO)	uniq in slsdg33
Solyc07g055383.1	Serine/threonine-protein kinase (AHRD V3.3 *-* M1BGG2_SOLTU)	AT1G78830	Curculin-like (mannose-binding) lectin family protein	uniq in slsdg33
Solyc02g080030.1	Receptor-like protein kinase (AHRD V3.3 *** C6F1T6_SOYBN)	AT4G23160	cysteine-rich RLK (RECEPTOR-like protein kinase) 8	uniq in slsdg33
Solyc01g073800.2	LOW QUALITY:Cysteine/Histidine-rich C1 domain family protein (AHRD V3.3 *** AT2G44380.1)	AT2G44380	Cysteine/Histidine-rich C1 domain family protein	uniq in slsdg33
Solyc01g065820.1	LOW QUALITY:Dehydrin protein (AHRD V3.3 *-* V9M5C3_MANES)	AT3G50980	dehydrin xero 1	uniq in slsdg33
Solyc12g044330.2	tonoplast intrinsic protein 2.1	AT3G16240	delta tonoplast integral protein	uniq in slsdg33
Solyc02g082120.3	DNA-3-methyladenine glycosylase, putative (AHRD V3.3 *** B9SVU2_RICCO)	AT5G44680	DNA glycosylase superfamily protein	uniq in slsdg33
Solyc07g061880.2	Retrovirus-related Pol polyprotein from transposon TNT 1-94 (AHRD V3.3 *-* A0A151TAX5_CAJCA)	ATMG00810	DNA/RNA polymerases superfamily protein	uniq in slsdg33
Solyc01g098330.1	LOW QUALITY:DNAJ heat shock N-terminal domain-containing protein, putative (AHRD V3.3 *-* A0A061F0P5_THECC)	AT5G18740	Domain of unknown function (DUF3444)	uniq in slsdg33
Solyc01g099840.3	Dormancy/auxin associated protein (AHRD V3.3 *** G7I8R1_MEDTR)	AT1G56220	Dormancy/auxin associated family protein	uniq in slsdg33
Solyc02g044000.2	Nucleic acid-binding, OB-fold (AHRD V3.3 *** A0A118JUD2_CYNCS)	AT4G18220	Drug/metabolite transporter superfamily protein	uniq in slsdg33
Solyc05g005180.3	enoyl-CoA hydratase/isomerase D (AHRD V3.3 *** AT1G60550.1)	AT1G60550	enoyl-CoA hydratase/isomerase D	uniq in slsdg33
Solyc09g065000.3	Eukaryotic aspartyl protease family protein, putative (AHRD V3.3 *** A0A061DRU5_THECC)	AT1G03220	Eukaryotic aspartyl protease family protein	uniq in slsdg33
Solyc08g081520.1	LOW QUALITY:Plant/F1M20-13 protein (AHRD V3.3 *** A0A072TUL8_MEDTR)	AT1G63930	from the Czech 'roh' meaning 'corner'	uniq in slsdg33
Solyc01g060490.3	GATA transcription factor, putative (AHRD V3.3 *** B9RZK8_RICCO)	AT5G49300	GATA transcription factor 16	uniq in slsdg33
Solyc03g080100.3	Heavy metal transport/detoxification superfamily protein (AHRD V3.3 *-* AT5G24580.4)	AT5G24580	Heavy metal transport/detoxification superfamily protein	uniq in slsdg33
Solyc05g051290.3	HMG-Y-related A (AHRD V3.3 *** A0A0B0M969_GOSAR)	AT1G14900	high mobility group A	uniq in slsdg33
Solyc08g005980.3	high-affinity nickel-transport family protein (AHRD V3.3 *** AT2G16800.1)	AT2G16800	high-affinity nickel-transport family protein	uniq in slsdg33
Solyc03g098060.2	ZF-HD homeobox protein (AHRD V3.3 *** A0A061FW93_THECC)	AT4G24660	homeobox protein 22	uniq in slsdg33
Solyc01g010600.3	Homeobox-leucine zipper protein family (AHRD V3.3 *** AT1G69780.1)	AT1G69780	Homeobox-leucine zipper protein family	uniq in slsdg33
Solyc04g080500.3	Myb family transcription factor family protein (AHRD V3.3 *** B9H0R6_POPTR)	AT2G21650	Homeodomain-like superfamily protein	uniq in slsdg33
Solyc04g080130.3	Zinc finger protein (AHRD V3.3 *** K9P0T0_9ROSI)	AT3G50700	indeterminate(ID)-domain 2	uniq in slsdg33
Solyc04g071770.3	Ethylene-responsive transcription factor (AHRD V3.3 *** W9RA19_9ROSA)	AT2G33710	Integrase-type DNA-binding superfamily protein	uniq in slsdg33
Solyc03g098710.1	Kunitz trypsin inhibitor (AHRD V3.3 *** B8Y888_TOBAC)	AT1G17860	Kunitz family trypsin and protease inhibitor protein	uniq in slsdg33
Solyc01g108900.3	pollen leucine rich repeat domain-extensin	AT3G19020	Leucine-rich repeat (LRR) family protein	uniq in slsdg33
Solyc11g072930.2	Leucine-rich repeat transmembrane protein kinase protein, putative (AHRD V3.3 *** A0A061GWK2_THECC)	AT4G29990	Leucine-rich repeat transmembrane protein kinase protein	uniq in slsdg33
Solyc03g096550.3	PLAT domain-containing protein 1 (AHRD V3.3 *** PLAT1_ARATH)	AT4G39730	Lipase/lipooxygenase, PLAT/LH2 family protein	uniq in slsdg33
Solyc06g075335.1	LOB domain-containing protein, putative (AHRD V3.3 *-* B9SK21_RICCO)	AT1G07900	LOB domain-containing protein 1	uniq in slsdg33
Solyc06g075330.2	LOB domain-containing protein, putative (AHRD V3.3 *** B9SK21_RICCO)	AT2G28500	LOB domain-containing protein 11	uniq in slsdg33
Solyc01g107190.3	LOB domain-containing protein, putative (AHRD V3.3 *** B9SGY6_RICCO)	AT5G67420	LOB domain-containing protein 37	uniq in slsdg33
Solyc03g111130.1	Malate synthase (AHRD V3.3 *** K4BJX6_SOLLC)	AT5G03860	malate synthase	uniq in slsdg33
Solyc02g083410.3	Receptor-like protein kinase THESEUS 1 (AHRD V3.3 *** A0A061DGF7_THECC)	AT3G04690	Malectin/receptor-like protein kinase family protein	uniq in slsdg33
Solyc01g108910.3	Maternal effect embryo arrest protein, putative (AHRD V3.3 *** G7JNK2_MEDTR)	AT2G15890	maternal effect embryo arrest 14	uniq in slsdg33
Solyc06g048570.3	Methyl esterase 17 (AHRD V3.3 *** A0A061FZJ0_THECC)	AT3G10870	methyl esterase 17	uniq in slsdg33
Solyc01g108745.1	Polyneuridine-aldehyde esterase-like protein (AHRD V3.3 *** A0A075F1V8_TOBAC)	AT2G23610	methyl esterase 3	uniq in slsdg33
Solyc01g007750.3	Mitochondrial transcription termination factor family protein (AHRD V3.3 *** AT2G36000.1)	AT2G36000	Mitochondrial transcription termination factor family protein	uniq in slsdg33
Solyc04g076300.3	Mechanosensitive ion channel protein 2, chloroplastic (AHRD V3.3 *-* A0A0B2PMX7_GLYSO)	AT1G58200	MSCS-like 3	uniq in slsdg33
Solyc04g076303.1	Mechanosensitive ion channel-like protein (AHRD V3.3 *** G7J535_MEDTR)	AT1G58200	MSCS-like 3	uniq in slsdg33
Solyc05g009720.3	Two-component response regulator (AHRD V3.3 *** W9RG69_9ROSA)	AT1G68670	myb-like transcription factor family protein	uniq in slsdg33
Solyc00g020030.1	LOW QUALITY:TBP-associated factor 2 (AHRD V3.3 --* AT1G73960.3)	NA	NA	uniq in slsdg33
Solyc00g057880.3	DELLA protein SLR1 (AHRD V3.3 --* SLR1_ORYSI)	NA	NA	uniq in slsdg33
Solyc01g049920.1	Cytochrome c oxidase biogenesis protein Cmc1-like protein (AHRD V3.3 --* AT4G21192.2)	NA	NA	uniq in slsdg33
Solyc01g065680.2	LOW QUALITY:Protein phosphatase 2C and cyclic nucleotide-binding/kinase domain-containing protein (AHRD V3.3 --* A0A199V352_ANACO)	NA	NA	uniq in slsdg33
Solyc01g066290.2	LOW QUALITY:Xaa-Pro aminopeptidase 1 (AHRD V3.3 --* A0A199W6F4_ANACO)	NA	NA	uniq in slsdg33
Solyc01g087035.1	asparagine synthetase 2 (AHRD V3.3 --* AT5G65010.2)	NA	NA	uniq in slsdg33
Solyc01g102285.1	Low temperature and salt responsive protein (AHRD V3.3 *-* Q8H9B8_SOLTU)	NA	NA	uniq in slsdg33
Solyc02g014690.1	Late embryogenesis abundant (LEA) hydroxyproline-rich glycoprotein family (AHRD V3.3 --* AT2G46150.1)	NA	NA	uniq in slsdg33
Solyc02g077870.1	LOW QUALITY:membrane-associated kinase regulator (AHRD V3.3 --* AT5G26230.1)	NA	NA	uniq in slsdg33
Solyc03g071700.1	LOW QUALITY:Photosystem I iron-sulfur center (AHRD V3.3 --* PSAC_PINTH)	NA	NA	uniq in slsdg33
Solyc04g006950.3	SWI/SNF-related matrix-associated actin-dependent regulator of chromatin subfamily A-like protein 1 (AHRD V3.3 --* A0A1D1YML1_9ARAE)	NA	NA	uniq in slsdg33
Solyc04g076307.1	zinc finger (ubiquitin-hydrolase) domain-containing protein (AHRD V3.3 --* AT2G42160.3)	NA	NA	uniq in slsdg33
Solyc05g010550.1	LOW QUALITY:1-acyl-sn-glycerol-3-phosphate acyltransferase 2 (AHRD V3.3 --* LPAT2_ARATH)	NA	NA	uniq in slsdg33
Solyc05g018060.1	LOW QUALITY:Transducin/WD40 repeat-like superfamily protein (AHRD V3.3 --* AT3G06880.2)	NA	NA	uniq in slsdg33
Solyc05g032630.1	LOW QUALITY:aldehyde dehydrogenase 3H1 (AHRD V3.3 --* AT1G44170.3)	NA	NA	uniq in slsdg33
Solyc05g039940.2	LOW QUALITY:Glucan endo-1,3-beta-glucosidase, acidic isoform GL161 (AHRD V3.3 --* E13K_TOBAC)	NA	NA	uniq in slsdg33
Solyc05g041390.1	LOW QUALITY:TRAM, LAG1 and CLN8 (TLC) lipid-sensing domain containing protein (AHRD V3.3 -** AT4G10360.3)	NA	NA	uniq in slsdg33
Solyc06g009810.3	Ethylene-responsive transcription factor, putative (AHRD V3.3 --* A0A061G219_THECC)	NA	NA	uniq in slsdg33
Solyc08g067380.1	LOW QUALITY:NBS-LRR disease resistance protein (AHRD V3.3 --* G7IA97_MEDTR)	NA	NA	uniq in slsdg33
Solyc08g082380.1	LOW QUALITY:Nucleosome assembly protein 1-3 (AHRD V3.3 --* NAP1C_ORYSJ)	NA	NA	uniq in slsdg33
Solyc09g015430.3	Negative regulator of sporulation MDS3 (AHRD V3.3 --* A0A0B0N6H6_GOSAR)	NA	NA	uniq in slsdg33
Solyc09g097770.3	Glycine-rich protein (AHRD V3.3 *** D2K2T8_TOBAC)	NA	NA	uniq in slsdg33
Solyc10g081680.1	LOW QUALITY:trehalose-6-phosphate synthase (AHRD V3.3 --* AT1G78580.4)	NA	NA	uniq in slsdg33
Solyc11g006145.1	Ethylene receptor homolog (AHRD V3.3 *-* Q9XET9_SOLLC)	NA	NA	uniq in slsdg33
Solyc11g056470.2	LOW QUALITY:RING/U-box superfamily protein (AHRD V3.3 --* AT5G66070.4)	NA	NA	uniq in slsdg33
Solyc12g026470.2	Heat shock factor, putative (AHRD V3.3 --* Q25BL9_BRAOL)	NA	NA	uniq in slsdg33
Solyc12g036727.1	NADH-ubiquinone oxidoreductase chain 5 (AHRD V3.3 --* NU5M_WHEAT)	NA	NA	uniq in slsdg33
Solyc12g036740.1	protein VARIATION IN COMPOUND TRIGGERED ROOT growth protein (AHRD V3.3 --* AT5G46500.4)	NA	NA	uniq in slsdg33
Solyc12g039170.1	LOW QUALITY:potassium transporter 2 (AHRD V3.3 --* AT2G40540.5)	NA	NA	uniq in slsdg33
Solyc12g056040.1	LOW QUALITY:Calcium-dependent lipid-binding (CaLB domain) family protein (AHRD V3.3 --* AT1G04540.1)	NA	NA	uniq in slsdg33
sly-MIR167b	NA	NA	NA	uniq in slsdg33
sly-MIR1919a	NA	NA	NA	uniq in slsdg33
Solyc03g120990.3	Malic enzyme (AHRD V3.3 *** M0ZRW2_SOLTU)	AT1G79750	NADP-malic enzyme 4	uniq in slsdg33
Solyc05g053530.1	9-cis-epoxycarotenoid dioxygenase, putative (AHRD V3.3 *** B9RWM0_RICCO)	AT3G24220	nine-cis-epoxycarotenoid dioxygenase 6	uniq in slsdg33
Solyc06g074990.2	putative high affinity nitrate transporter 2	AT1G08090	nitrate transporter 2:1	uniq in slsdg33
Solyc12g089210.2	Ornithine carbamoyltransferase (AHRD V3.3 *** K4BVE0_SOLLC)	AT1G75330	ornithine carbamoyltransferase	uniq in slsdg33
Solyc08g080660.1	Osmotin-like protein (AHRD V3.3 *** OLPA_TOBAC)	AT4G11650	osmotin 34	uniq in slsdg33
Solyc08g078460.3	Oxidoreductase family protein (AHRD V3.3 *** AT4G17370.1)	AT4G17370	Oxidoreductase family protein	uniq in slsdg33
Solyc03g120800.3	Peroxidase (AHRD V3.3 *-* K4BMM9_SOLLC)	AT4G33870	Peroxidase superfamily protein	uniq in slsdg33
Solyc10g084200.2	Peroxidase (AHRD V3.3 *** K4D3K6_SOLLC)	AT4G26010	Peroxidase superfamily protein	uniq in slsdg33
Solyc02g081130.2	BAH-PHD domain-containing protein (AHRD V3.3 *** A0A0K9P0E3_ZOSMR)	AT4G22140	PHD finger family protein / bromo-adjacent homology (BAH) domain-containing protein	uniq in slsdg33
Solyc04g074430.1	Phosphate-responsive 1 family protein (AHRD V3.3 *-* A0A061FGW0_THECC)	AT4G08950	Phosphate-responsive 1 family protein	uniq in slsdg33
Solyc02g079390.3	Plant cadmium resistance 8-like protein (AHRD V3.3 *** A0A0B0NN69_GOSAR)	AT1G11380	PLAC8 family protein	uniq in slsdg33
Solyc01g098960.2	Hexosyltransferase (AHRD V3.3 *** K4B0T3_SOLLC)	AT1G54940	plant glycogenin-like starch initiation protein 4	uniq in slsdg33
Solyc01g100810.3	Neutral/alkaline invertase (AHRD V3.3 *** V5N4X0_MANES)	AT1G56560	Plant neutral invertase family protein	uniq in slsdg33
Solyc08g028780.1	LOW QUALITY:DUF868 family protein (AHRD V3.3 *** G7J9W6_MEDTR)	AT5G11000	Plant protein of unknown function (DUF868)	uniq in slsdg33
Solyc12g098110.1	LOW QUALITY:Self-incompatibility S1 family protein (AHRD V3.3 *** Q9LIQ2_ARATH)	AT3G24060	Plant self-incompatibility protein S1 family	uniq in slsdg33
Solyc06g076600.2	Kinase family protein (AHRD V3.3 *** B9HPA3_POPTR)	AT5G59010	Protein kinase protein with tetratricopeptide repeat domain	uniq in slsdg33
Solyc12g016070.1	Kinase family protein (AHRD V3.3 *-* D7MB90_ARALL)	AT4G31170	Protein kinase superfamily protein	uniq in slsdg33
Solyc12g008600.2	DUF1005 family protein (DUF1005) (AHRD V3.3 *** AT4G29310.1)	AT4G29310	Protein of unknown function (DUF1005)	uniq in slsdg33
Solyc11g069450.1	LOW QUALITY:Senescence regulator (AHRD V3.3 *** A0A103XHC6_CYNCS)	AT3G45210	Protein of unknown function, DUF584	uniq in slsdg33
Solyc05g007590.3	Isopenicillin N epimerase-like protein (AHRD V3.3 *** G7KWF1_MEDTR)	AT5G26600	Pyridoxal phosphate (PLP)-dependent transferases superfamily protein	uniq in slsdg33
Solyc09g011990.1	Clade IV lectin receptor kinase (AHRD V3.3 *** K4CRM4_SOLLC)	AT2G37710	receptor lectin kinase	uniq in slsdg33
Solyc10g051240.1	Leucine-rich repeat receptor-like protein kinase family protein (AHRD V3.3 --* AT4G08850.2)	AT1G47890	receptor like protein 7	uniq in slsdg33
Solyc01g014700.2	LOW QUALITY:Serine/threonine-protein kinase (AHRD V3.3 *-* K4ASL8_SOLLC)	AT5G60900	receptor-like protein kinase 1	uniq in slsdg33
Solyc05g025687.1	Respiratory burst oxidase, putative (AHRD V3.3 *-* B9RR53_RICCO)	AT1G64060	respiratory burst oxidase protein F	uniq in slsdg33
Solyc06g048930.3	Tomato Response regulator 16,17	AT3G56380	response regulator 17	uniq in slsdg33
Solyc12g011440.2	60S ribosomal protein L18a-like protein (AHRD V3.3 *** A0A199VD98_ANACO)	AT1G17080	Ribosomal protein L18ae family	uniq in slsdg33
Solyc12g099960.1	LOW QUALITY:Ribosomal-like protein, putative (AHRD V3.3 *** I3RZK0_MEDTR)	AT1G16790	ribosomal protein-related	uniq in slsdg33
Solyc07g054080.2	RING/U-box superfamily protein (AHRD V3.3 *-* AT1G19310.1)	AT4G03510	RING membrane-anchor 1	uniq in slsdg33
Solyc05g008640.1	RING/U-box superfamily protein (AHRD V3.3 *-* AT1G80400.1)	AT1G15100	RING-H2 finger A2A	uniq in slsdg33
Solyc05g008390.3	RING/FYVE/PHD zinc finger superfamily protein (AHRD V3.3 *** A0A061EGA0_THECC)	AT2G01275	RING/FYVE/PHD zinc finger superfamily protein	uniq in slsdg33
Solyc06g066360.2	RING/FYVE/PHD zinc finger protein, putative (AHRD V3.3 *-* G7IWF3_MEDTR)	AT5G16680	RING/FYVE/PHD zinc finger superfamily protein	uniq in slsdg33
Solyc01g087060.3	E3 ubiquitin ligase BIG brother, putative (AHRD V3.3 *-* G7LDM4_MEDTR)	AT3G63530	RING/U-box superfamily protein	uniq in slsdg33
Solyc01g088450.2	RING/U-box superfamily protein (AHRD V3.3 *-* AT1G53820.1)	AT1G53820	RING/U-box superfamily protein	uniq in slsdg33
Solyc01g100100.3	RING/U-box superfamily protein, putative (AHRD V3.3 *** A0A061E1W0_THECC)	AT4G38140	RING/U-box superfamily protein	uniq in slsdg33
Solyc03g032060.1	RING/U-box superfamily protein (AHRD V3.3 *** AT1G20823.1)	AT1G20823	RING/U-box superfamily protein	uniq in slsdg33
Solyc05g010170.1	LOW QUALITY:RING/U-box superfamily protein, putative (AHRD V3.3 *** A0A061E7G0_THECC)	AT5G41400	RING/U-box superfamily protein	uniq in slsdg33
Solyc12g055710.1	RING/U-box superfamily protein (AHRD V3.3 *** AT1G72310.1)	AT1G72310	RING/U-box superfamily protein	uniq in slsdg33
Solyc02g082270.3	RNA binding protein, putative (AHRD V3.3 *** B9R8T5_RICCO)	AT1G76460	RNA-binding (RRM/RBD/RNP motifs) family protein	uniq in slsdg33
Solyc04g074750.3	RNA-binding (RRM/RBD/RNP motifs) family protein (AHRD V3.3 *** AT4G09040.1)	AT4G09040	RNA-binding (RRM/RBD/RNP motifs) family protein	uniq in slsdg33
Solyc03g034060.3	Kinase family protein (AHRD V3.3 *** U5GFC9_POPTR)	AT2G18470	roline-rich extensin-like receptor kinase 4	uniq in slsdg33
Solyc01g110630.3	Small auxin up-regulated RNA9	AT4G38840	SAUR-like auxin-responsive protein family	uniq in slsdg33
Solyc01g110710.3	Small auxin up-regulated RNA10	AT2G21210	SAUR-like auxin-responsive protein family	uniq in slsdg33
Solyc01g110860.1	SAUR-like auxin-responsive protein family (AHRD V3.3 *** AT4G34770.1)	AT4G34770	SAUR-like auxin-responsive protein family	uniq in slsdg33
Solyc04g052970.2	SAUR-like auxin-responsive protein family (AHRD V3.3 *** AT5G18030.1)	AT5G18030	SAUR-like auxin-responsive protein family	uniq in slsdg33
Solyc04g052990.1	SAUR-like auxin-responsive protein family (AHRD V3.3 *** AT1G29500.1)	AT1G29500	SAUR-like auxin-responsive protein family	uniq in slsdg33
Solyc10g054720.1	Small auxin up-regulated RNA78	AT1G75580	SAUR-like auxin-responsive protein family	uniq in slsdg33
Solyc10g084020.1	SAUR-like auxin-responsive protein family, putative (AHRD V3.3 *** A0A061EU13_THECC)	AT2G28085	SAUR-like auxin-responsive protein family	uniq in slsdg33
Solyc11g011640.1	SAUR-like auxin-responsive protein family, putative (AHRD V3.3 *** A0A061E5G9_THECC)	AT1G29500	SAUR-like auxin-responsive protein family	uniq in slsdg33
Solyc11g011650.1	SAUR-like auxin-responsive protein family (AHRD V3.3 *** AT2G21210.2)	AT2G21210	SAUR-like auxin-responsive protein family	uniq in slsdg33
Solyc11g011660.1	SAUR-like auxin-responsive protein family, putative (AHRD V3.3 *** A0A061E5G9_THECC)	AT1G29500	SAUR-like auxin-responsive protein family	uniq in slsdg33
Solyc12g007060.1	LOW QUALITY:serine-rich protein-like protein (AHRD V3.3 --* AT5G55980.1)	AT5G55980	serine-rich protein-related	uniq in slsdg33
Solyc11g005990.2	Transcriptional corepressor SEUSS-like protein (AHRD V3.3 *-* A0A0B0MD44_GOSAR)	AT1G43850	SEUSS transcriptional co-regulator	uniq in slsdg33
Solyc07g051950.3	S-type anion channel SLAH1 (AHRD V3.3 *** W9QIC7_9ROSA)	AT1G62280	SLAC1 homologue 1	uniq in slsdg33
Solyc03g111310.3	SNF1-related protein kinase regulatory subunit gamma 1 (AHRD V3.3 *** A0A061G5Z8_THECC)	AT3G48530	SNF1-related protein kinase regulatory subunit gamma 1	uniq in slsdg33
Solyc01g087770.3	Subtilisin-like protease (AHRD V3.3 *** A0A0B2SDI9_GLYSO)	AT2G05920	Subtilase family protein	uniq in slsdg33
Solyc01g087775.1	Subtilisin-like protease (AHRD V3.3 *-* Q38708_ALNGL)	AT5G67090	Subtilisin-like serine endopeptidase family protein	uniq in slsdg33
Solyc01g111400.3	Subtilisin-like protease (AHRD V3.3 *** W9QT04_9ROSA)	AT4G34980	subtilisin-like serine protease 2	uniq in slsdg33
Solyc02g078020.3	Telomerase activating protein Est1, putative (AHRD V3.3 *** A0A061GFN7_THECC)	AT1G28260	Telomerase activating protein Est1	uniq in slsdg33
Solyc01g105880.4	Monoterpenoid synthase 2	AT3G25810	Terpenoid cyclases/Protein prenyltransferases superfamily protein	uniq in slsdg33
Solyc04g081560.3	Pathogenesis-related thaumatin family protein (AHRD V3.3 *** A0A072UXB7_MEDTR)	AT4G24180	THAUMATIN-LIKE PROTEIN 1	uniq in slsdg33
Solyc04g011820.1	Glutaredoxin (AHRD V3.3 *** A0A103Y3D7_CYNCS)	AT5G18600	Thioredoxin superfamily protein	uniq in slsdg33
Solyc04g011840.1	Glutaredoxin family protein (AHRD V3.3 *** B9I9V9_POPTR)	AT1G03020	Thioredoxin superfamily protein	uniq in slsdg33
Solyc04g011850.1	Glutaredoxin family protein (AHRD V3.3 *** B9I9V9_POPTR)	AT1G03020	Thioredoxin superfamily protein	uniq in slsdg33
Solyc04g011870.1	Glutaredoxin family protein (AHRD V3.3 *** B9I9V9_POPTR)	AT1G03020	Thioredoxin superfamily protein	uniq in slsdg33
Solyc04g078910.3	Thioredoxin, putative (AHRD V3.3 *** B9R7C2_RICCO)	AT1G07700	Thioredoxin superfamily protein	uniq in slsdg33
Solyc09g074590.1	Glutaredoxin (AHRD V3.3 *** A0A103Y7J3_CYNCS)	AT5G18600	Thioredoxin superfamily protein	uniq in slsdg33
Solyc02g055370.3	Transcriptional factor B3 family protein (AHRD V3.3 *-* AT4G31650.2)	AT4G31640	transcriptional factor B3 family protein	uniq in slsdg33
Solyc07g054430.3	Glutamate formiminotransferase 1 (AHRD V3.3 *** B4F7V5_MAIZE)	AT2G20830	transferases;folic acid binding	uniq in slsdg33
Solyc07g006500.3	trehalose-6-phosphate synthase 1	AT2G18700	trehalose phosphatase/synthase 11	uniq in slsdg33
Solyc09g005160.2	E3 ubiquitin-protein ligase-like protein (AHRD V3.3 *** A0A1B1LUK2_VITPS)	AT4G12570	ubiquitin protein ligase 5	uniq in slsdg33
Solyc07g043060.1	Glycosyltransferase (AHRD V3.3 *** K4CEG6_SOLLC)	AT1G07260	UDP-glucosyl transferase 71C3	uniq in slsdg33
Solyc01g090680.3	Cation/H(+) antiporter 11 (AHRD V3.3 *-* A0A1D1XXR2_9ARAE)	AT4G25170	Uncharacterised conserved protein (UCP012943)	uniq in slsdg33
Solyc03g071660.2	LOW QUALITY:Enhancer of mRNA-decapping protein 4 (AHRD V3.3 *-* W9QQU0_9ROSA)	AT3G13290	varicose-related	uniq in slsdg33
Solyc12g088630.1	Transducin family protein / WD-40 repeat family protein (AHRD V3.3 *** A0A0K9NVB9_ZOSMR)	AT5G67320	WD-40 repeat family protein	uniq in slsdg33
Solyc07g055710.3	SolycHsfA4b	AT5G45710	winged-helix DNA-binding transcription factor family protein	uniq in slsdg33
Solyc11g011570.1	RING/U-box superfamily protein (AHRD V3.3 *-* AT3G19950.3)	AT3G46620	zinc finger (C3HC4-type RING finger) family protein	uniq in slsdg33
B. Down-regulated genes in slsdg33 vs WT
Gene ID	ITAG3.2 annotation	Arabidopsis homolog	TAIR10 annotation	shared with slsdg34
Solyc01g079460.2	LOW QUALITY:BnaC09g16130D protein (AHRD V3.3 *** A0A078E278_BRANA)	AT1G56423	NA	shared
Solyc02g090260.2	Golgin candidate 6 isoform 2 (AHRD V3.3 *** A0A061DMU6_THECC)	AT3G50430	NA	shared
Solyc02g093720.3	TPX2 (Targeting protein for Xklp2) family protein, putative (AHRD V3.3 *** A0A072U7R9_MEDTR)	AT3G27350	NA	shared
Solyc02g093890.1	Emb|CAB62340.1 (AHRD V3.3 *** Q9FKS6_ARATH)	AT3G27250	NA	shared
Solyc03g006040.3	Transcription factor bHLH35-like protein (AHRD V3.3 *** A0A0B0MJP3_GOSAR)	AT1G29270	NA	shared
Solyc03g118060.3	NADH-ubiquinone reductase complex 1 MLRQ subunit (AHRD V3.3 *** G7K3Q0_MEDTR)	AT5G07330	NA	shared
Solyc04g007990.1	LOW QUALITY:ATP synthase subunit beta, chloroplastic (AHRD V3.3 --* ATPB_CALFL)	AT1G67920	NA	shared
Solyc04g076010.3	RING/FYVE/PHD zinc finger superfamily protein (AHRD V3.3 --* AT1G43770.3)	AT1G02070	NA	shared
Solyc04g076340.3	Ribosomal RNA small subunit methyltransferase A (AHRD V3.3 *** A0A0B0NTG7_GOSAR)	AT4G38060	NA	shared
Solyc05g015890.3	transmembrane protein (AHRD V3.3 *** AT1G27990.1)	AT1G27990	NA	shared
Solyc06g034310.3	Myb/SANT-like DNA-binding domain protein (AHRD V3.3 *** G7LIE6_MEDTR)	AT4G02550	NA	shared
Solyc06g060570.3	Dihydrofolate reductase (AHRD V3.3 *** A0A0B0NHA3_GOSAR)	AT4G24380	NA	shared
Solyc06g066700.1	serine-rich protein-like protein (AHRD V3.3 --* AT3G13227.1)	AT1G52342	NA	shared
Solyc06g068620.3	Negative regulator of sporulation MDS3 (AHRD V3.3 *-* A0A0B0N6H6_GOSAR)	AT5G43150	NA	shared
Solyc06g069150.1	LOW QUALITY:Zinc finger BED domain-containing protein DAYSLEEPER (AHRD V3.3 --* DSLE_ARATH)	AT1G13360	NA	shared
Solyc06g074190.3	Plant/F24K9-26 protein (AHRD V3.3 *** A0A072UED0_MEDTR)	AT3G11590	NA	shared
Solyc07g039195.1	Dystrophin-1 (AHRD V3.3 *-* A0A0B0NKV5_GOSAR)	AT5G56850	NA	shared
Solyc07g054060.3	Phospho-N-acetylmuramoyl-pentapeptide-transferase, putative (AHRD V3.3 *-* A0A061EAV9_THECC)	AT5G42110	NA	shared
Solyc08g016415.1	kinesin-like calmodulin-binding protein (ZWICHEL) (AHRD V3.3 --* AT5G65930.2)	AT2G38465	NA	shared
Solyc09g008530.2	F-box and Leucine Rich Repeat domains containing protein, putative isoform 1 (AHRD V3.3 *** A0A061ETN1_THECC)	AT1G22060	NA	shared
Solyc09g008660.3	LOW QUALITY:Protein CHUP1, chloroplastic (AHRD V3.3 *** A0A0B2P3P6_GLYSO)	AT2G36650	NA	shared
Solyc09g008970.1	LOW QUALITY:AT3g10020/T22K18_16 (AHRD V3.3 *** Q9SR67_ARATH)	AT3G10020	NA	shared
Solyc09g009220.3	histone-lysine N-methyltransferase SETD1B-like protein (AHRD V3.3 *-* AT5G03670.1)	AT5G03670	NA	shared
Solyc09g061730.2	Late embryogenesis abundant protein 1 (AHRD V3.3 --* LEA1_ORYSI)	AT3G24750	NA	shared
Solyc09g098115.1	Voltage-gated hydrogen channel 1 (AHRD V3.3 *** A0A151T9W1_CAJCA)	AT1G10800	NA	shared
Solyc10g048060.1	myosin XI D (AHRD V3.3 --* AT2G33240.5)	ATMG00030	NA	shared
Solyc10g050220.2	cold regulated protein 27 (AHRD V3.3 *** AT5G42900.2)	AT4G33980	NA	shared
Solyc11g005930.2	Coiled-coil domain-containing protein 18, putative isoform 2 (AHRD V3.3 *** A0A061DJK4_THECC)	AT4G33467	NA	shared
Solyc11g045150.1	myosin XI D (AHRD V3.3 --* AT2G33240.8)	ATMG00030	NA	shared
Solyc11g068390.1	LOW QUALITY:B-box type zinc finger protein with CCT domain-containing protein (AHRD V3.3 --* AT2G33500.2)	AT3G52740	NA	shared
Solyc12g097060.1	LOW QUALITY:UPF0329 protein ECU01_0100/ECU01_1510/ECU08_0030, putative isoform 2 (AHRD V3.3 *** A0A061ELC2_THECC)	AT4G13540	NA	shared
Solyc12g098880.2	TRAM, LAG1 and CLN8 (TLC) lipid-sensing domain containing protein (AHRD V3.3 --* AT1G45010.4)	AT3G17580	NA	shared
Solyc08g062340.3	Heat-shock protein, putative (AHRD V3.3 *** B9RQT7_RICCO)	AT5G12020	17.6 kDa class II heat shock protein	shared
Solyc08g062450.1	Heat-shock protein, putative (AHRD V3.3 *** B9RQT7_RICCO)	AT5G12020	17.6 kDa class II heat shock protein	shared
Solyc01g006680.3	2-oxoglutarate (2OG) and Fe(II)-dependent oxygenase superfamily protein (AHRD V3.3 *** AT3G20810.5)	AT3G20810	2-oxoglutarate (2OG) and Fe(II)-dependent oxygenase superfamily protein	shared
Solyc06g073080.3	2-oxoglutarate (2OG) and Fe(II)-dependent oxygenase superfamily protein (AHRD V3.3 *** AT5G24530.1)	AT5G24530	2-oxoglutarate (2OG) and Fe(II)-dependent oxygenase superfamily protein	shared
Solyc06g082030.3	2-oxoglutarate (2OG) and Fe(II)-dependent oxygenase superfamily protein (AHRD V3.3 *** AT5G58660.1)	AT5G58660	2-oxoglutarate (2OG) and Fe(II)-dependent oxygenase superfamily protein	shared
Solyc08g062383.1	2-oxoglutarate (2OG) and Fe(II)-dependent oxygenase superfamily protein (AHRD V3.3 *-* AT1G78550.1)	AT1G78550	2-oxoglutarate (2OG) and Fe(II)-dependent oxygenase superfamily protein	shared
Solyc11g010410.2	2-oxoglutarate (2OG) and Fe(II)-dependent oxygenase superfamily protein (AHRD V3.3 *** AT5G24530.1)	AT5G24530	2-oxoglutarate (2OG) and Fe(II)-dependent oxygenase superfamily protein	shared
Solyc11g072110.2	2-oxoglutarate (2OG) and Fe(II)-dependent oxygenase superfamily protein (AHRD V3.3 *** AT1G55290.1)	AT1G55290	2-oxoglutarate (2OG) and Fe(II)-dependent oxygenase superfamily protein	shared
Solyc11g006290.2	3-oxo-5-alpha-steroid 4-dehydrogenase family protein (AHRD V3.3 *** AT5G16010.1)	AT5G16010	3-oxo-5-alpha-steroid 4-dehydrogenase family protein	shared
Solyc11g006300.2	3-oxo-5-alpha-steroid 4-dehydrogenase family protein (AHRD V3.3 *** AT5G16010.1)	AT5G16010	3-oxo-5-alpha-steroid 4-dehydrogenase family protein	shared
Solyc03g113060.3	ABC transporter A family protein (AHRD V3.3 *** A0A072UUA7_MEDTR)	AT3G47780	ABC2 homolog 6	shared
Solyc04g005380.3	Ninja-family protein AFP1-like protein (AHRD V3.3 *** V5KZR9_SOLNI)	AT1G69260	ABI five binding protein	shared
Solyc05g012210.3	Ninja-family protein AFP1-like protein (AHRD V3.3 *** V5KZR9_SOLNI)	AT1G69260	ABI five binding protein	shared
Solyc10g050210.2	Abscisic acid responsive element-binding factor 1 family protein (AHRD V3.3 *** U5GLH1_POPTR)	AT1G45249	abscisic acid responsive elements-binding factor 2	shared
Solyc01g057430.3	Carboxyltransferase alpha Subunit (AHRD V3.3 *-* A0A0G2SJ78_SALMI)	AT2G38040	acetyl Co-enzyme a carboxylase carboxyltransferase alpha subunit	shared
Solyc05g021555.1	Alcohol dehydrogenase (AHRD V3.3 *** Q4LAW8_CAPCH)	AT1G77120	alcohol dehydrogenase 1	shared
Solyc05g021570.2	Alcohol dehydrogenase (AHRD V3.3 *-* ADH_FRAAN)	AT1G77120	alcohol dehydrogenase 1	shared
Solyc02g086970.3	Aldehyde dehydrogenase (AHRD V3.3 *** Q1AFF6_VITPS)	AT3G48000	aldehyde dehydrogenase 2B4	shared
Solyc01g109160.4	CYP74C4	AT5G42650	allene oxide synthase	shared
Solyc04g014930.2	Alpha 1,4-glycosyltransferase family protein (AHRD V3.3 --* Q2MGS1_MEDTR)	AT4G19900	alpha 1,4-glycosyltransferase family protein	shared
Solyc07g055720.3	Heat shock protein, putative (AHRD V3.3 *** Q8LD91_ARATH)	AT1G06460	alpha-crystallin domain 32.1	shared
Solyc12g035430.1	LOW QUALITY:Alpha-N-acetylglucosaminidase (AHRD V3.3 *-* Q9ZR45_TOBAC)	AT5G13690	alpha-N-acetylglucosaminidase family / NAGLU family	shared
Solyc04g081670.3	Vacuolar-processing enzyme (AHRD V3.3 *-* W9R3H2_9ROSA)	AT2G25940	alpha-vacuolar processing enzyme	shared
Solyc01g103660.3	Embryogenesis-associated EMB8 (AHRD V3.3 *** A0A0B0MZB5_GOSAR)	AT5G49950	alpha/beta-Hydrolases superfamily protein	shared
Solyc07g032170.3	alpha/beta-Hydrolases superfamily protein (AHRD V3.3 *-* AT4G24160.2)	AT4G24160	alpha/beta-Hydrolases superfamily protein	shared
Solyc07g042500.3	Alpha/beta-Hydrolases superfamily protein, putative (AHRD V3.3 *** A0A061GM37_THECC)	AT2G03140	alpha/beta-Hydrolases superfamily protein	shared
Solyc08g078090.1	Alpha/beta-Hydrolases superfamily protein (AHRD V3.3 *** A0A061GB30_THECC)	AT4G16820	alpha/beta-Hydrolases superfamily protein	shared
Solyc09g010220.3	Lysosomal pro-X carboxypeptidase, putative (AHRD V3.3 *** B9SX01_RICCO)	AT2G24280	alpha/beta-Hydrolases superfamily protein	shared
Solyc12g042890.2	Acyl-protein thioesterase 2 (AHRD V3.3 *** A0A0B0PZC3_GOSAR)	AT1G52700	alpha/beta-Hydrolases superfamily protein	shared
Solyc05g009590.3	aluminum activated malate transporter family protein (AHRD V3.3 *** AT1G18420.1)	AT3G18440	aluminum-activated malate transporter 9	shared
Solyc07g066000.3	Amino acid permease (AHRD V3.3 *-* S8CYC9_9LAMI)	AT1G44100	amino acid permease 5	shared
Solyc02g032860.3	5'-adenylylsulfate reductase (AHRD V3.3 *** A0A072V4H5_MEDTR)	AT4G21990	APS reductase 3	shared
Solyc03g031620.3	5'-adenylylsulfate reductase (AHRD V3.3 *** A0A072V4H5_MEDTR)	AT4G21990	APS reductase 3	shared
Solyc02g092783.1	Tetratricopeptide repeat-containing protein (AHRD V3.3 *** D7MQ06_ARALL)	AT5G43120	ARM-repeat/Tetratricopeptide repeat (TPR)-like protein	shared
Solyc11g066890.1	Arogenate dehydratase (AHRD V3.3 *** K4D9U6_SOLLC)	AT1G08250	arogenate dehydratase 6	shared
Solyc03g116460.3	Aspartate racemase (AHRD V3.3 *** A0A0B2QLV5_GLYSO)	AT1G15410	aspartate-glutamate racemase family	shared
Solyc02g062330.2	Kinesin-like protein (AHRD V3.3 *** M1AVJ1_SOLTU)	AT5G66310	ATP binding microtubule motor family protein	shared
Solyc01g017220.1	ATP synthase epsilon chain, chloroplastic (AHRD V3.3 *** ATPE_SOLLC)	ATCG00470	ATP synthase epsilon chain	shared
Solyc04g039850.1	LOW QUALITY:ATP synthase subunit beta (AHRD V3.3 *-* ATCG00480.1)	ATCG00480	ATP synthase subunit beta	shared
Solyc07g062000.1	LOW QUALITY:ATP synthase subunit beta (AHRD V3.3 *-* Q9MTX5_9SOLN)	ATCG00480	ATP synthase subunit beta	shared
Solyc12g062530.2	ATP synthase beta subunit (AHRD V3.3 *-* H6X0W0_9ASTE)	ATCG00480	ATP synthase subunit beta	shared
Solyc07g027010.1	LOW QUALITY:ATP synthase subunit alpha (AHRD V3.3 *-* Q5VL33_9LILI)	AT2G07698	ATPase, F1 complex, alpha subunit protein	shared
Solyc10g080730.2	Thioredoxin, putative (AHRD V3.3 *** B9SHJ2_RICCO)	AT1G08570	atypical CYS HIS rich thioredoxin 4	shared
Solyc03g120390.3	Auxin responsive protein IPR003311 AUX_IAA protein	AT1G04250	AUX/IAA transcriptional regulator family protein	shared
Solyc03g031990.3	Auxin efflux carrier family protein (AHRD V3.3 *** AT1G20925.1)	AT1G20925	Auxin efflux carrier family protein	shared
Solyc12g095750.2	Auxin efflux carrier family protein, putative (AHRD V3.3 *** A0A061FMX0_THECC)	AT1G20925	Auxin efflux carrier family protein	shared
Solyc06g063280.1	LOW QUALITY:Zinc finger family protein (AHRD V3.3 *** B9HV28_POPTR)	AT3G21150	B-box 32	shared
Solyc09g074560.3	CONSTANS-like zinc finger protein (AHRD V3.3 *** A0A0H3YNS5_9ROSI)	AT2G47890	B-box type zinc finger protein with CCT domain	shared
Solyc02g078130.3	bHLH transcription factor 079	AT4G20970	basic helix-loop-helix (bHLH) DNA-binding superfamily protein	shared
Solyc04g006990.3	bHLH transcription factor 029	AT1G68810	basic helix-loop-helix (bHLH) DNA-binding superfamily protein	shared
Solyc06g069370.3	bHLH transcription factor 046	AT5G08130	basic helix-loop-helix (bHLH) DNA-binding superfamily protein	shared
Solyc09g065100.2	bHLH transcription factor 150	AT4G09820	basic helix-loop-helix (bHLH) DNA-binding superfamily protein	shared
Solyc10g008245.1	basic helix-loop-helix (bHLH) DNA-binding superfamily protein (AHRD V3.3 *** AT4G20970.1)	AT4G20970	basic helix-loop-helix (bHLH) DNA-binding superfamily protein	shared
Solyc02g061990.3	Bzip transcription factor (AHRD V3.3 *** A0A087GK23_ARAAL)	AT2G17770	basic region/leucine zipper motif 27	shared
Solyc08g061130.3	BZIP transcription factor (AHRD V3.3 *** L0MZN5_MALDO)	AT5G11260	Basic-leucine zipper (bZIP) transcription factor family protein	shared
Solyc10g083380.2	BZIP transcription factor family protein (AHRD V3.3 *-* B9MTQ4_POPTR)	AT1G19490	Basic-leucine zipper (bZIP) transcription factor family protein	shared
Solyc06g007240.3	BAG family molecular chaperone regulator 2 (AHRD V3.3 *** A0A0B2PCD3_GLYSO)	AT5G52060	BCL-2-associated athanogene 1	shared
Solyc01g044373.1	HAT family dimerisation domain containing protein (AHRD V3.3 *-* Q2QRD1_ORYSJ)	AT3G42170	BED zinc finger ;hAT family dimerisation domain	shared
Solyc09g091030.3	Beta-amylase 1	AT3G23920	beta-amylase 1	shared
Solyc11g028275.1	Condensin complex subunit 1 (AHRD V3.3 *-* A0A164XVD4_DAUCA)	AT3G57060	binding	shared
Solyc06g071830.2	BTB/POZ and TAZ domain protein (AHRD V3.3 *** G7JMM8_MEDTR)	AT5G63160	BTB and TAZ domain protein 1	shared
Solyc06g071820.3	BTB/POZ and TAZ domain protein (AHRD V3.3 *** G7JMM8_MEDTR)	AT3G48360	BTB and TAZ domain protein 2	shared
Solyc09g082660.3	Caffeoyl-CoA O-methyltransferase (AHRD V3.3 *** Q2YHM9_PLAMJ)	AT1G67980	caffeoyl-CoA 3-O-methyltransferase	shared
Solyc10g079790.1	Plant calmodulin-binding-like protein (AHRD V3.3 *-* G7KRQ7_MEDTR)	AT5G04020	calmodulin binding	shared
Solyc06g035520.3	Gibberellin receptor GID1 (AHRD V3.3 *** A0A151RHF2_CAJCA)	AT5G62180	carboxyesterase 20	shared
Solyc11g071225.1	Carotenoid cleavage dioxygenase (AHRD V3.3 *** B6UEM5_MAIZE)	AT3G63520	carotenoid cleavage dioxygenase 1	shared
Solyc03g115770.3	Timing of cab expression 1/pseudo-response regulator 1 (AHRD V3.3 *** J9PWT0_NICAT)	AT5G61380	CCT motif -containing response regulator protein	shared
Solyc02g069490.3	Sterol reductase (AHRD V3.3 *** E1VD17_SOLTU)	AT3G19820	cell elongation protein / DWARF1 / DIMINUTO (DIM)	shared
Solyc09g091510.3	chalcone synthase 1	AT5G13930	Chalcone and stilbene synthase family protein	shared
Solyc05g052240.3	Chalcone-flavonone isomerase family protein (AHRD V3.3 *** A0A0V0H4Z0_SOLCH)	AT5G05270	Chalcone-flavanone isomerase family protein	shared
Solyc05g008120.3	Chaperone DnaJ (AHRD V3.3 *** A0A0B0MDP3_GOSAR)	AT1G71000	Chaperone DnaJ-domain superfamily protein	shared
Solyc02g081060.3	Retrovirus-related Pol polyprotein from transposon TNT 1-94 (AHRD V3.3 *** A0A151T5P9_CAJCA)	AT4G04330	Chaperonin-like RbcX protein	shared
Solyc01g098420.2	Receptor protein kinase, putative (AHRD V3.3 *-* B9SH40_RICCO)	AT3G21630	chitin elicitor receptor kinase 1	shared
Solyc08g077530.3	Beta-amylase (AHRD V3.3 *** K4CNB2_SOLLC)	AT4G17090	chloroplast beta-amylase	shared
Solyc02g011815.1	30S ribosomal protein S15, chloroplastic (AHRD V3.3 *-* RR15_SOLLC)	ATCG01120	chloroplast ribosomal protein S15	shared
Solyc01g017110.1	NADH dehydrogenase subunit (AHRD V3.3 *-* Q8HSC3_9SOLN)	ATCG01280	Chloroplast Ycf2;ATPase, AAA type, core	shared
Solyc06g082535.1	cinnamate-4-hydroxylase (AHRD V3.3 *** AT2G30490.1)	AT2G30490	cinnamate-4-hydroxylase	shared
Solyc07g054180.3	Clathrin light chain protein (AHRD V3.3 *** AT2G20760.1)	AT2G20760	Clathrin light chain protein	shared
Solyc04g082200.2	LOW QUALITY:dehydrin	AT1G20440	cold-regulated 47	shared
Solyc07g045180.3	CONSTANS-like zinc finger protein (AHRD V3.3 *** A0A023GS52_SOYBN)	AT3G07650	CONSTANS-like 9	shared
Solyc12g006240.2	CONSTANS-like zinc finger protein (AHRD V3.3 *** A0A023GS52_SOYBN)	AT3G07650	CONSTANS-like 9	shared
Solyc02g088940.3	CTP synthase family protein (AHRD V3.3 *-* AT1G30820.1)	AT1G30820	CTP synthase family protein	shared
Solyc01g067215.1	cullin 1 (AHRD V3.3 *-* AT4G02570.4)	AT4G02570	cullin 1	shared
Solyc11g012130.2	Blue copper protein (AHRD V3.3 *** A0A0B2RLQ3_GLYSO)	AT3G27200	Cupredoxin superfamily protein	shared
Solyc08g067590.1	CW-type Zinc Finger (AHRD V3.3 *-* AT3G62900.3)	AT3G62900	CW-type Zinc Finger	shared
Solyc09g007840.3	Cyclic nucleotide-gated channel (AHRD V3.3 *** A0A0K9PRG4_ZOSMR)	AT2G28260	cyclic nucleotide-gated channel 15	shared
Solyc04g081660.2	cyclinB2_3	AT1G76310	CYCLIN B2;4	shared
Solyc11g007590.2	OTU domain-containing protein (AHRD V3.3 *** A0A0B2NUV7_GLYSO)	AT3G57810	Cysteine proteinases superfamily protein	shared
Solyc04g078140.3	Cytochrome B5 (AHRD V3.3 *** Q9ZSP7_PETHY)	AT5G48810	cytochrome B5 isoform D	shared
Solyc11g066580.2	flavonoid 3`%2C5`-hydroxylase	AT5G07990	Cytochrome P450 superfamily protein	shared
Solyc01g094140.3	Cytochrome P450 family protein (AHRD V3.3 *** B9IC22_POPTR)	AT2G45510	cytochrome P450, family 704, subfamily A, polypeptide 2	shared
Solyc03g111995.1	Cytochrome P450 (AHRD V3.3 *-* A0A103XWH5_CYNCS)	AT3G48280	cytochrome P450, family 71, subfamily A, polypeptide 25	shared
Solyc07g052070.2	Cytochrome P450 (AHRD V3.3 *** A0A118JYC4_CYNCS)	AT3G14690	cytochrome P450, family 72, subfamily A, polypeptide 15	shared
Solyc07g055550.2	Cytochrome P450 (AHRD V3.3 *** A0A124SAX2_CYNCS)	AT3G14690	cytochrome P450, family 72, subfamily A, polypeptide 15	shared
Solyc07g043460.3	Cytochrome P450, putative (AHRD V3.3 *** A0A061E4E7_THECC)	AT3G14610	cytochrome P450, family 72, subfamily A, polypeptide 7	shared
Solyc04g080650.3	LOW QUALITY:Cytochrome P450, putative (AHRD V3.3 *** B9R7Y0_RICCO)	AT1G19630	cytochrome P450, family 722, subfamily A, polypeptide 1	shared
Solyc02g090265.1	Cytochrome P450 (AHRD V3.3 *-* A0A103Y527_CYNCS)	AT2G45560	cytochrome P450, family 76, subfamily C, polypeptide 1	shared
Solyc02g090267.1	Cytochrome P450 (AHRD V3.3 *** Q8H0I6_PETHY)	AT2G45550	cytochrome P450, family 76, subfamily C, polypeptide 4	shared
Solyc09g092580.3	Cytochrome P450, putative (AHRD V3.3 *** B9R857_RICCO)	AT4G31500	cytochrome P450, family 83, subfamily B, polypeptide 1	shared
Solyc10g078240.2	Cytochrome P450 (AHRD V3.3 *** A0A103VZI8_CYNCS)	AT2G40890	cytochrome P450, family 98, subfamily A, polypeptide 3	shared
Solyc07g062810.3	Branched-chain-amino-acid aminotransferase-like protein (AHRD V3.3 *** I3SQ86_MEDTR)	AT5G57850	D-aminoacid aminotransferase-like PLP-dependent enzymes superfamily protein	shared
Solyc04g081900.3	Cysteine/Histidine-rich C1 domain family protein (AHRD V3.3 --* AT2G44380.1)	AT1G60420	DC1 domain-containing protein	shared
Solyc02g084850.3	Abscisic acid and environmental stress-inducible protein TAS14 (AHRD V3.3 *** TAS14_SOLLC)	AT3G50980	dehydrin xero 1	shared
Solyc10g006000.3	Protein DEK (AHRD V3.3 *** A0A0B2PUB3_GLYSO)	AT3G48710	DEK domain-containing chromatin associated protein	shared
Solyc02g085020.3	dihydroflavonol 4-reductase	AT5G42800	dihydroflavonol 4-reductase	shared
Solyc05g054020.2	LOW QUALITY:NBS-LRR resistance protein-like protein (AHRD V3.3 *** A1Y9Q9_SOLLC)	AT1G59620	Disease resistance protein (CC-NBS-LRR class) family	shared
Solyc12g042910.2	Cryptochrome-1 (AHRD V3.3 *** A0A151SGR1_CAJCA)	AT3G15620	DNA photolyase family protein	shared
Solyc07g007220.3	Protein phosphatase 2c, putative (AHRD V3.3 *** B9T2N5_RICCO)	AT2G25620	DNA-binding protein phosphatase 1	shared
Solyc07g021290.1	LOW QUALITY:DNA-directed RNA polymerase subunit beta'' (AHRD V3.3 *-* RPOC2_SOLLC)	ATCG00170	DNA-directed RNA polymerase family protein	shared
Solyc12g062560.1	Ribulose bisphosphate carboxylase large chain (AHRD V3.3 *-* RBL_CLAXA)	ATCG00180	DNA-directed RNA polymerase family protein	shared
Solyc02g014860.3	DnaJ domain-containing protein (AHRD V3.3 *** A0A124SD50_CYNCS)	AT5G23240	DNAJ heat shock N-terminal domain-containing protein	shared
Solyc03g098030.3	Type I inositol-1,4,5-trisphosphate 5-phosphatase (AHRD V3.3 *** G7KHW0_MEDTR)	AT2G01900	DNAse I-like superfamily protein	shared
Solyc08g016586.1	Ulp1 protease family, C-terminal catalytic domain containing protein (AHRD V3.3 *-* Q60D46_SOLDE)	AT1G31150	Domain of unknown function (DUF1985)	shared
Solyc06g051460.3	Double Clp-N motif-containing P-loop nucleoside triphosphate hydrolases superfamily protein, putative (AHRD V3.3 *** A0A061FKC4_THECC)	AT2G29970	Double Clp-N motif-containing P-loop nucleoside triphosphate hydrolases superfamily protein	shared
Solyc01g108040.1	Dynamin-related protein 3A (AHRD V3.3 *-* A0A1D1XWG2_9ARAE)	AT2G14120	dynamin related protein	shared
Solyc01g005310.3	Dynamin (AHRD V3.3 *** E5GB64_CUCME)	AT1G14830	DYNAMIN-like 1C	shared
Solyc01g108035.1	Dynamin-related protein 3A (AHRD V3.3 *-* A0A0B2RN44_GLYSO)	AT4G33650	dynamin-related protein 3A	shared
Solyc11g042800.2	Late embryogenesis abundant protein (AHRD V3.3 *-* Q56ZD1_ARATH)	AT2G36640	embryonic cell protein 63	shared
Solyc11g068880.2	Eukaryotic aspartyl protease family protein, putative (AHRD V3.3 *-* A0A061GZN2_THECC)	AT3G52500	Eukaryotic aspartyl protease family protein	shared
Solyc04g077760.1	LOW QUALITY:Exocyst complex component 7 (AHRD V3.3 *** W9RYK4_9ROSA)	AT4G31540	exocyst subunit exo70 family protein G1	shared
Solyc12g055770.1	LOW QUALITY:Exocyst complex exo70-like protein (AHRD V3.3 *** G7I5R5_MEDTR)	AT4G31540	exocyst subunit exo70 family protein G1	shared
Solyc03g115320.2	Expansin (AHRD V3.3 *** Q7X9Q3_SAMNI)	AT5G39280	expansin A23	shared
Solyc05g013180.3	Phosphate transporter PHO1-like protein (AHRD V3.3 *** A0A193CD86_9ERIC)	AT1G69480	EXS (ERD1/XPR1/SYG1) family protein	shared
Solyc01g010502.1	LOW QUALITY:F-box family protein (AHRD V3.3 *-* AT1G31080.1)	AT1G47730	F-box and associated interaction domains-containing protein	shared
Solyc02g079150.2	F-box family protein (AHRD V3.3 *** B9H220_POPTR)	AT4G21510	F-box family protein	shared
Solyc09g005520.2	LOW QUALITY:F-box family protein, putative (AHRD V3.3 *-* A0A061GHK4_THECC)	AT3G16210	F-box family protein	shared
Solyc10g052650.2	F-box protein (AHRD V3.3 *-* A0A0B2RZB4_GLYSO)	AT2G16365	F-box family protein	shared
Solyc07g064410.1	Kua-ubiquitin conjugating enzyme hybrid, localization (AHRD V3.3 *** A0A103XYI2_CYNCS)	AT4G27030	fatty acid desaturase A	shared
Solyc08g063090.2	Sphingolipid delta-8 desaturase (AHRD V3.3 *** A4GK73_TOBAC)	AT2G46210	Fatty acid/sphingolipid desaturase	shared
Solyc03g097390.3	Acyl-[acyl-carrier-protein] hydrolase (AHRD V3.3 *** K4BJF6_SOLLC)	AT1G08510	fatty acyl-ACP thioesterases B	shared
Solyc10g078265.1	Peptidyl-prolyl cis-trans isomerase (AHRD V3.3 *** A0A0K9NXQ5_ZOSMR)	AT5G48570	FKBP-type peptidyl-prolyl cis-trans isomerase family protein	shared
Solyc02g083860.3	flavanone 3-dioxygenase	AT3G51240	flavanone 3-hydroxylase	shared
Solyc01g005300.3	Flavin-binding kelch domain F box protein (AHRD V3.3 *** A0A088AWQ7_SOYBN)	AT1G68050	flavin-binding, kelch repeat, f box 1	shared
Solyc03g115830.2	Galactoside 2-alpha-L-fucosyltransferase (AHRD V3.3 *** W9QNS6_9ROSA)	AT2G03220	fucosyltransferase 1	shared
Solyc07g047920.2	Galactoside 2-alpha-L-fucosyltransferase (AHRD V3.3 *** FUT1_PEA)	AT2G03220	fucosyltransferase 1	shared
Solyc05g050220.3	TAF-3 (AHRD V3.3 *** Q40587_TOBAC)	AT2G46270	G-box binding factor 3	shared
Solyc03g083160.2	gamma-irradiation and mitomycin c induced 1 (AHRD V3.3 *-* AT5G24280.3)	AT5G24280	gamma-irradiation and mitomycin c induced 1	shared
Solyc01g108047.1	GATA transcription factor-like protein (AHRD V3.3 *** A0A0X7YHI0_SOLTU)	AT4G17570	GATA transcription factor 26	shared
Solyc01g099030.3	GDSL esterase/lipase (AHRD V3.3 *** A0A0B2PL43_GLYSO)	AT1G28590	GDSL-like Lipase/Acylhydrolase superfamily protein	shared
Solyc06g083650.3	GDSL esterase/lipase (AHRD V3.3 *** A0A0B2SFU0_GLYSO)	AT5G33370	GDSL-like Lipase/Acylhydrolase superfamily protein	shared
Solyc07g061730.3	gibberellin 2-oxidase 5	AT1G30040	gibberellin 2-oxidase	shared
Solyc10g007570.3	Gibberellin 2-oxidase 2 (AHRD V3.3 *** I0B5A7_PETHY)	AT1G30040	gibberellin 2-oxidase	shared
Solyc02g080120.2	Gibberellin 2-beta- dioxygenase 7	AT4G21200	gibberellin 2-oxidase 8	shared
Solyc01g109790.3	ADP-glucose pyrophosphorylase large subunit 1	AT4G39210	Glucose-1-phosphate adenylyltransferase family protein	shared
Solyc01g005000.3	Glutamate decarboxylase (AHRD V3.3 *** B1Q3F2_SOLLC)	AT2G02010	glutamate decarboxylase 4	shared
Solyc02g081340.3	Glutathione S-transferase (AHRD V3.3 *** E1AWJ7_CAPAN)	AT3G03190	glutathione S-transferase F11	shared
Solyc05g006730.3	Glutathione S-transferase family protein (AHRD V3.3 *-* AT1G10370.1)	AT1G10370	Glutathione S-transferase family protein	shared
Solyc01g091260.3	Myeloid leukemia factor 1 (AHRD V3.3 *** A0A0B0Q1A9_GOSAR)	AT4G22740	glycine-rich protein	shared
Solyc03g093800.1	glycine-rich protein (AHRD V3.3 *-* AT5G61660.1)	AT5G61660	glycine-rich protein	shared
Solyc07g052960.2	GRAS family TF	AT3G49950	GRAS family transcription factor	shared
Solyc11g013740.2	Guanylate-binding family protein (AHRD V3.3 *-* AT5G46070.1)	AT5G46070	Guanylate-binding family protein	shared
Solyc03g120020.3	Boron transporter, putative (AHRD V3.3 *** A0A061G9M0_THECC)	AT1G15460	HCO3- transporter family	shared
Solyc11g066100.2	heat shock protein 70 (AHRD V3.3 *** AT3G12580.1)	AT5G02500	heat shock cognate protein 70-1	shared
Solyc03g115230.3	Solanum lycopersicum heat shock protein	AT1G74310	heat shock protein 101	shared
Solyc05g014280.3	small heat shock protein 1	AT4G27670	heat shock protein 21	shared
Solyc04g011440.4	ethylene-responsive heat shock protein cognate 70	AT3G12580	heat shock protein 70	shared
Solyc06g052050.3	Heat shock protein 70 (AHRD V3.3 *** Q9M4E8_CUCSA)	AT5G42020	Heat shock protein 70 (Hsp 70) family protein	shared
Solyc06g053950.2	Heat shock transcription factor (AHRD V3.3 *-* A0A076L230_GOSHI)	AT3G22830	heat shock transcription factor A6B	shared
Solyc06g053960.3	SolycHsfA6b	AT3G22830	heat shock transcription factor A6B	shared
Solyc09g065660.3	SolycHsfA7	AT3G22830	heat shock transcription factor A6B	shared
Solyc09g082670.3	SolycHsfA6a	AT3G22830	heat shock transcription factor A6B	shared
Solyc08g062960.3	SolycHsfA2	AT2G26150	heat shock transcription factor A2	shared
Solyc04g015030.3	Heavy metal transport/detoxification superfamily protein (AHRD V3.3 *** I3STQ6_MEDTR)	AT5G50740	Heavy metal transport/detoxification superfamily protein	shared
Solyc05g049990.3	Heavy metal transport/detoxification superfamily protein (AHRD V3.3 *** A0A072TW71_MEDTR)	AT1G01490	Heavy metal transport/detoxification superfamily protein	shared
Solyc11g012690.2	Heavy metal transport/detoxification superfamily protein (AHRD V3.3 *** I3STQ6_MEDTR)	AT5G50740	Heavy metal transport/detoxification superfamily protein	shared
Solyc03g007230.3	Protein phosphatase 2c, putative (AHRD V3.3 *** B9RIK1_RICCO)	AT1G07430	highly ABA-induced PP2C gene 2	shared
Solyc06g051940.3	Protein phosphatase 2c, putative (AHRD V3.3 *** B9RIK1_RICCO)	AT1G07430	highly ABA-induced PP2C gene 2	shared
Solyc12g094440.2	High mobility group family (AHRD V3.3 *** E5GCD0_CUCME)	AT1G76110	HMG (high mobility group) box protein with ARID/BRIGHT DNA-binding domain	shared
Solyc01g096320.3	Homeobox-leucine zipper protein (AHRD V3.3 *** M4W1Z7_TOBAC)	AT2G46680	homeobox 7	shared
Solyc04g077220.3	Homeobox-leucine zipper protein family (AHRD V3.3 *** AT4G37790.1)	AT4G37790	Homeobox-leucine zipper protein family	shared
Solyc02g090400.3	Two-component response regulator (AHRD V3.3 *** W9S3N8_9ROSA)	AT4G37180	Homeodomain-like superfamily protein	shared
Solyc06g005680.3	Two-component response regulator (AHRD V3.3 *** W9RUI2_9ROSA)	AT3G46640	Homeodomain-like superfamily protein	shared
Solyc07g052490.3	Myb transcription factor (AHRD V3.3 *-* A0A072UKM9_MEDTR)	AT1G01380	Homeodomain-like superfamily protein	shared
Solyc04g072160.3	HSP20-like chaperones superfamily protein (AHRD V3.3 *** A0A061FJ96_THECC)	AT4G02450	HSP20-like chaperones superfamily protein	shared
Solyc06g076570.3	class I small heat shock protein	AT1G07400	HSP20-like chaperones superfamily protein	shared
Solyc11g071560.2	Hsp20/alpha crystallin family protein (AHRD V3.3 *** Q94GC7_SOLDE)	AT2G27140	HSP20-like chaperones superfamily protein	shared
Solyc07g052060.2	LOW QUALITY:HXXXD-type acyl-transferase family protein, putative (AHRD V3.3 *** A0A061E8Z9_THECC)	AT3G26040	HXXXD-type acyl-transferase family protein	shared
Solyc12g088170.2	HXXXD-type acyl-transferase family protein, putative (AHRD V3.3 *** A0A061E8Z9_THECC)	AT3G26040	HXXXD-type acyl-transferase family protein	shared
Solyc03g097440.3	Dehydrogenase/reductase SDR family protein 7-like protein (AHRD V3.3 *** A0A0B0P5K8_GOSAR)	AT5G50700	hydroxysteroid dehydrogenase 1	shared
Solyc09g074780.3	Zinc finger protein (AHRD V3.3 *** E9NZV2_PHAVU)	AT3G50700	indeterminate(ID)-domain 2	shared
Solyc12g098590.2	Glycosyltransferase (AHRD V3.3 *** K4DHN2_SOLLC)	AT4G15550	indole-3-acetate beta-D-glucosyltransferase	shared
Solyc01g096865.1	AP2-like ethylene-responsive transcription factor (AHRD V3.3 *-* A0A0K9PVT8_ZOSMR)	AT3G54320	Integrase-type DNA-binding superfamily protein	shared
Solyc05g052410.2	Dehydration responsive element binding protein (AHRD V3.3 *** Q8GZF2_SOLLC)	AT2G40340	Integrase-type DNA-binding superfamily protein	shared
Solyc06g050520.2	dehydration responsive element binding protein 1	AT2G40340	Integrase-type DNA-binding superfamily protein	shared
Solyc08g081650.2	Ethylene-responsive transcription factor (AHRD V3.3 *-* W9RJN8_9ROSA)	AT1G68550	Integrase-type DNA-binding superfamily protein	shared
Solyc03g019710.3	TDR8	AT2G42830	K-box region and MADS-box transcription factor family protein	shared
Solyc01g081210.3	F-box/kelch-repeat protein SKIP25, putative (AHRD V3.3 *** G7K6R4_MEDTR)	AT1G31350	KAR-UP F-box 1	shared
Solyc10g078770.2	Seed maturation protein (AHRD V3.3 *** Q9LKC5_GLYTO)	AT5G06760	Late Embryogenesis Abundant 4-5	shared
Solyc07g053360.3	Late embryogenesis abundant domain-containing family protein (AHRD V3.3 *** B9IQP9_POPTR)	AT2G42560	late embryogenesis abundant domain-containing protein / LEA domain-containing protein	shared
Solyc10g008040.3	Late embryogenesis abundant protein-like (AHRD V3.3 *-* Q9LF88_ARATH)	AT2G42560	late embryogenesis abundant domain-containing protein / LEA domain-containing protein	shared
Solyc12g097050.2	Late embryogenesis-abundant protein (AHRD V3.3 --* Q5G1J3_ISATI)	AT1G52690	Late embryogenesis abundant protein (LEA) family protein	shared
Solyc02g086960.2	LOW QUALITY:Serine-threonine protein kinase, putative (AHRD V3.3 *** A0A061ED60_THECC)	AT2G01820	Leucine-rich repeat protein kinase family protein	shared
Solyc11g069960.2	RLK-1	AT1G68400	leucine-rich repeat transmembrane protein kinase family protein	shared
Solyc08g080040.3	Anthocyanidin synthase (AHRD V3.3 *** A0A0A1E1Z9_9SOLA)	AT4G22880	leucoanthocyanidin dioxygenase	shared
Solyc05g005915.1	Major facilitator superfamily protein (AHRD V3.3 *** AT1G52190.1)	AT1G52190	Major facilitator superfamily protein	shared
Solyc08g074960.3	Major facilitator superfamily protein (AHRD V3.3 *** AT5G45275.1)	AT5G45275	Major facilitator superfamily protein	shared
Solyc01g091870.3	SPX domain-containing family protein (AHRD V3.3 *** B9GW54_POPTR)	AT4G22990	Major Facilitator Superfamily with SPX (SYG1/Pho81/XPR1) domain-containing protein	shared
Solyc01g109950.3	Kinase, putative (AHRD V3.3 *** B9RH93_RICCO)	AT4G39110	Malectin/receptor-like protein kinase family protein	shared
Solyc01g066560.3	Protein DETOXIFICATION (AHRD V3.3 *** K4AWQ7_SOLLC)	AT5G49130	MATE efflux family protein	shared
Solyc03g025190.4	anthocyanin permease	AT4G00350	MATE efflux family protein	shared
Solyc06g006000.3	Maternal effect embryo arrest 59 (AHRD V3.3 *** A0A061GXA8_THECC)	AT4G37300	maternal effect embryo arrest 59	shared
Solyc04g071290.3	Mitochondrial substrate carrier family protein (AHRD V3.3 *-* AT5G42130.1)	AT5G42130	Mitochondrial substrate carrier family protein	shared
Solyc08g078695.1	Heat-shock protein, putative (AHRD V3.3 *** B9SSG1_RICCO)	AT4G25200	mitochondrion-localized small heat shock protein 23.6	shared
Solyc07g064820.1	LOW QUALITY:MAP kinase kinase kinase 59	AT5G55090	mitogen-activated protein kinase kinase kinase 15	shared
Solyc02g090990.1	MAP kinase kinase kinase 23	AT4G36950	mitogen-activated protein kinase kinase kinase 21	shared
Solyc05g046150.3	Major latex-like protein (AHRD V3.3 *** B5THI3_PANGI)	AT1G70840	MLP-like protein 31	shared
Solyc03g044930.2	Sn-1 protein (AHRD V3.3 *** Q42393_CAPAN)	AT1G70890	MLP-like protein 43	shared
Solyc10g081320.1	LOW QUALITY:R2R3MYB transcription factor 69	AT1G69560	myb domain protein 105	shared
Solyc10g086250.2	R2R3MYB transcription factor 75	AT1G66370	myb domain protein 113	shared
Solyc10g086270.2	R2R3MYB transcription factor 28	AT1G66370	myb domain protein 113	shared
Solyc10g086290.2	R2R3MYB transcription factor 114	AT1G66370	myb domain protein 113	shared
Solyc01g079620.3	colorless fruit epidermis	AT2G47460	myb domain protein 12	shared
Solyc12g049350.2	R2R3MYB transcription factor 11	AT2G47460	myb domain protein 12	shared
Solyc06g005330.3	R2R3MYB transcription factor 59	AT3G46130	myb domain protein 48	shared
Solyc08g008480.3	Myb transcription factor,R2R3MYB transcription factor 4	AT3G13540	myb domain protein 5	shared
Solyc10g005400.3	Myo-inositol oxygenase (AHRD V3.3 *** C6K2L2_SOLLC)	AT1G14520	myo-inositol oxygenase 1	shared
Solyc04g074120.3	Synaptonemal complex protein 1 (AHRD V3.3 *** A0A151TZS6_CAJCA)	AT1G22260	Myosin heavy chain-related protein	shared
Solyc07g009520.2	WEB family protein, chloroplastic (AHRD V3.3 *-* A0A199V6Z9_ANACO)	AT4G40020	Myosin heavy chain-related protein	shared
Solyc09g091080.3	myosin XI A (AHRD V3.3 *** AT1G04600.1)	AT1G04600	myosin XI A	shared
sly-MIR156a	NA	NA	NA	shared
Solyc00g006540.1	LOW QUALITY:DNA ligase (AHRD V3.3 --* K4CCL3_SOLLC)	NA	NA	shared
Solyc00g273110.2	DNA ligase 4 (AHRD V3.3 --* H6URY6_NICBE)	NA	NA	shared
Solyc01g006380.2	U-box domain-containing protein (AHRD V3.3 *** B6V8G2_HELAN)	NA	NA	shared
Solyc01g011460.2	Retrovirus-related Pol polyprotein from transposon TNT 1-94 (AHRD V3.3 *-* A0A151R160_CAJCA)	NA	NA	shared
Solyc01g017490.1	calcium-dependent lipid-binding family protein (AHRD V3.3 --* AT1G48090.6)	NA	NA	shared
Solyc01g067220.1	RING/U-box superfamily protein (AHRD V3.3 --* AT1G32361.1)	NA	NA	shared
Solyc01g104413.1	Pre-mRNA-processing-splicing factor (AHRD V3.3 --* AT1G80070.1)	NA	NA	shared
Solyc01g104433.1	Pentatricopeptide repeat-containing protein (AHRD V3.3 --* D7MPU5_ARALL)	NA	NA	shared
Solyc02g011873.1	IAA carboxylmethyltransferase 1 (AHRD V3.3 --* AT5G55250.2)	NA	NA	shared
Solyc02g011975.1	50S ribosomal protein L23, chloroplastic (AHRD V3.3 --* A0A023I0F1_9ROSI)	NA	NA	shared
Solyc02g020880.2	60S ribosomal protein L12 (AHRD V3.3 --* RL12_PRUAR)	NA	NA	shared
Solyc02g030464.1	Glucan endo-1,3-beta-glucosidase 8 (AHRD V3.3 --* E138_ARATH)	NA	NA	shared
Solyc02g032360.3	Desiccation-related protein PCC13-62 (AHRD V3.3 --* A0A061DRH0_THECC)	NA	NA	shared
Solyc02g049090.1	LOW QUALITY:Guard cell S-type anion channel SLAC1 (AHRD V3.3 --* SLAC1_ARATH)	NA	NA	shared
Solyc02g067000.2	Latex abundant protein 1 (AHRD V3.3 --* B9N9R7_POPTR)	NA	NA	shared
Solyc02g070840.1	secretory carrier 3 (AHRD V3.3 --* AT1G61250.2)	NA	NA	shared
Solyc02g082435.1	DNA mismatch repair protein mutL (AHRD V3.3 *-* A0A0B2SBZ1_GLYSO)	NA	NA	shared
Solyc02g082440.2	NSP-interacting kinase 2 (AHRD V3.3 --* AT3G25560.3)	NA	NA	shared
Solyc02g082613.1	Phototropic-responsive NPH3 family protein (AHRD V3.3 --* AT1G03010.3)	NA	NA	shared
Solyc02g084167.1	DNA mismatch repair protein mutL (AHRD V3.3 --* A0A151THR9_CAJCA)	NA	NA	shared
Solyc02g085025.1	Calcium-dependent lipid-binding (CaLB domain) family protein (AHRD V3.3 --* AT5G37740.2)	NA	NA	shared
Solyc02g088987.1	LOW QUALITY:Arginine/serine-rich splicing factor, putative (AHRD V3.3 --* B9T7V5_RICCO)	NA	NA	shared
Solyc02g090500.3	Phenylalanine ammonia-lyase (AHRD V3.3 --* D3K195_9ROSA)	NA	NA	shared
Solyc02g092515.1	DNA mismatch repair protein MLH3-like protein (AHRD V3.3 *-* A0A0X7YCF6_SOLTU)	NA	NA	shared
Solyc03g007400.2	Galactose oxidase/kelch repeat superfamily protein (AHRD V3.3 --* AT2G29780.2)	NA	NA	shared
Solyc03g026000.3	cold regulated protein 27 (AHRD V3.3 --* AT5G42900.2)	NA	NA	shared
Solyc03g044600.2	multidrug resistance-associated protein 6 (AHRD V3.3 --* AT3G21250.6)	NA	NA	shared
Solyc03g053040.1	nucleolar RNA-binding Nop10p family protein (AHRD V3.3 -** AT2G20490.3)	NA	NA	shared
Solyc03g058215.1	Mitochondrial transcription termination factor family protein (AHRD V3.3 --* AT1G61970.7)	NA	NA	shared
Solyc03g059235.1	Zinc finger protein CONSTANS-LIKE 3 (AHRD V3.3 --* COL3_ARATH)	NA	NA	shared
Solyc03g071730.1	LOW QUALITY:RNA-binding (RRM/RBD/RNP motifs) family protein (AHRD V3.3 --* AT1G31600.3)	NA	NA	shared
Solyc03g078580.3	LOW QUALITY:Unknown protein (AHRD V3.3 )	NA	NA	shared
Solyc03g116465.1	heavy metal atpase 4 (AHRD V3.3 --* AT2G19110.3)	NA	NA	shared
Solyc04g009145.1	tRNA wybutosine-synthesizing protein 2/3/4 (AHRD V3.3 --* TYW23_ARATH)	NA	NA	shared
Solyc04g014940.2	Glucose-1-phosphate adenylyltransferase family protein (AHRD V3.3 --* AT2G21590.7)	NA	NA	shared
Solyc04g018120.1	LOW QUALITY:Pattern formation protein EMB30 (AHRD V3.3 --* A0A0B2S8Q4_GLYSO)	NA	NA	shared
Solyc04g025282.1	autophagy 2 (AHRD V3.3 --* AT3G19190.3)	NA	NA	shared
Solyc04g050305.1	Nucleolar histone methyltransferase-related protein (AHRD V3.3 --* AT1G45248.3)	NA	NA	shared
Solyc04g057850.1	LOW QUALITY:Pvr4 (AHRD V3.3 *-* A0A1D5AHY8_CAPAN)	NA	NA	shared
Solyc04g076715.1	DNA-binding family protein (AHRD V3.3 -** A0A0K1ETQ6_9ROSI)	NA	NA	shared
Solyc04g082730.2	HSP20-like chaperones superfamily protein (AHRD V3.3 --* AT1G54850.1)	NA	NA	shared
Solyc05g009490.2	DNA polymerase epsilon catalytic subunit (AHRD V3.3 --* AT2G27120.3)	NA	NA	shared
Solyc05g021530.2	Alcohol dehydrogenase (AHRD V3.3 --* Q4LAW8_CAPCH)	NA	NA	shared
Solyc05g024410.3	Na+/H+ exchanger 8 (AHRD V3.3 --* AT1G14660.2)	NA	NA	shared
Solyc05g050240.3	Plastid division protein PDV1 (AHRD V3.3 *-* A0A199W2F8_ANACO)	NA	NA	shared
Solyc05g050695.1	Transmembrane Fragile-X-F-associated protein (AHRD V3.3 --* AT1G68820.2)	NA	NA	shared
Solyc05g050735.1	30S ribosomal protein S2, chloroplastic (AHRD V3.3 --* RR2_MARPO)	NA	NA	shared
Solyc05g053080.2	LOW QUALITY:endomembrane-type CA-ATPase 4 (AHRD V3.3 --* AT1G07670.2)	NA	NA	shared
Solyc06g005460.1	LOW QUALITY:Pectinesterase inhibitor (AHRD V3.3 *** PMEI_ACTDE)	NA	NA	shared
Solyc06g024200.1	BSD domain-containing protein (AHRD V3.3 --* AT1G26300.3)	NA	NA	shared
Solyc06g024207.1	alpha-1,2-Mannosidase (AHRD V3.3 --* D8RTN8_SELML)	NA	NA	shared
Solyc06g024230.1	LOW QUALITY:Senescence-associated protein, putative (AHRD V3.3 *-* A0A072THY4_MEDTR)	NA	NA	shared
Solyc06g024370.1	LOW QUALITY:calcium-dependent protein kinase 30 (AHRD V3.3 --* AT1G74740.1)	NA	NA	shared
Solyc06g043020.1	Atp synthase subunit alpha (AHRD V3.3 *** A0A061S892_9CHLO)	NA	NA	shared
Solyc06g048633.1	P-loop nucleoside triphosphate hydrolases superfamily protein with CH (Calponin Homology) domain-containing protein (AHRD V3.3 --* AT3G10310.2)	NA	NA	shared
Solyc06g051825.1	Excinuclease ABC, C subunit, N-terminal (AHRD V3.3 --* AT2G30350.2)	NA	NA	shared
Solyc06g062890.3	Unknown protein (AHRD V3.3 )	NA	NA	shared
Solyc06g067980.3	Late embryogenesis abundant protein (AHRD V3.3 --* Q2QKE8_CATRO)	NA	NA	shared
Solyc06g069060.1	LOW QUALITY:P-loop containing nucleoside triphosphate hydrolases superfamily protein (AHRD V3.3 --* AT5G67630.1)	NA	NA	shared
Solyc06g082020.3	Alternative NAD(P)H dehydrogenase 1 (AHRD V3.3 --* A0A061GX18_THECC)	NA	NA	shared
Solyc07g009450.1	LOW QUALITY:BEL1-like homeodomain 10 (AHRD V3.3 --* AT1G19700.5)	NA	NA	shared
Solyc07g017370.2	AMP-dependent synthetase and ligase family protein (AHRD V3.3 --* AT2G47240.4)	NA	NA	shared
Solyc07g017930.1	Transcription termination factor MTERF8, chloroplastic (AHRD V3.3 --* MTEF8_ARATH)	NA	NA	shared
Solyc07g019520.1	LOW QUALITY:Isocitrate lyase (AHRD V3.3 --* ACEA_RICCO)	NA	NA	shared
Solyc07g039280.1	LOW QUALITY:Senescence-associated protein, putative (AHRD V3.3 *-* A0A072THY2_MEDTR)	NA	NA	shared
Solyc07g039300.1	P-loop containing nucleoside triphosphate hydrolases superfamily protein (AHRD V3.3 --* AT1G73170.3)	NA	NA	shared
Solyc07g052250.3	Unknown protein (AHRD V3.3 )	NA	NA	shared
Solyc07g053225.1	Transmembrane amino acid transporter family protein (AHRD V3.3 --* AT1G08230.6)	NA	NA	shared
Solyc07g053250.3	F-box protein family (AHRD V3.3 --* A0A151SU61_CAJCA)	NA	NA	shared
Solyc07g054340.1	LOW QUALITY:RNI-like superfamily protein (AHRD V3.3 --* AT3G18150.1)	NA	NA	shared
Solyc08g015840.2	Receptor-like protein kinase-related family protein (AHRD V3.3 --* AT3G22020.2)	NA	NA	shared
Solyc08g016550.3	Unknown protein (AHRD V3.3 )	NA	NA	shared
Solyc08g022100.1	LOW QUALITY:Plasma-membrane choline transporter family protein (AHRD V3.3 --* AT3G04440.2)	NA	NA	shared
Solyc08g061160.2	LOW QUALITY:BnaC09g16480D protein (AHRD V3.3 *** A0A078G2W2_BRANA)	NA	NA	shared
Solyc08g061900.1	LOW QUALITY:NAD(P)H-quinone oxidoreductase subunit 2, chloroplastic (AHRD V3.3 *-* NU2C_SILLA)	NA	NA	shared
Solyc08g061903.1	Auxin response factor (AHRD V3.3 --* M5VPK1_PRUPE)	NA	NA	shared
Solyc08g066150.1	LOW QUALITY:Disease resistance protein (TIR-NBS-LRR class) family (AHRD V3.3 --* AT3G44480.5)	NA	NA	shared
Solyc08g067595.1	Ribonuclease H-like protein (AHRD V3.3 --* A0A061FNB8_THECC)	NA	NA	shared
Solyc08g078785.1	Peroxidase superfamily protein (AHRD V3.3 --* AT4G11290.1)	NA	NA	shared
Solyc08g080000.3	Transmembrane protein, putative (AHRD V3.3 *-* A0A072U537_MEDTR)	NA	NA	shared
Solyc08g081265.1	Flowering-promoting factor 1-like protein 3 (AHRD V3.3 --* FLP3_ORYSJ)	NA	NA	shared
Solyc09g007343.1	LOW QUALITY:F-box protein (AHRD V3.3 --* G7IWM2_MEDTR)	NA	NA	shared
Solyc09g010580.2	histidine biosynthesis bifunctional protein (HISIE) (AHRD V3.3 --* AT1G31860.3)	NA	NA	shared
Solyc09g010910.2	LOW QUALITY:Phosphatidylinositol 4-kinase alpha (AHRD V3.3 --* M8A4X8_TRIUA)	NA	NA	shared
Solyc09g057900.2	evolutionarily conserved C-terminal region 4 (AHRD V3.3 --* AT1G55500.6)	NA	NA	shared
Solyc09g059345.1	Zinc finger, CW-type (AHRD V3.3 --* A0A103YNR4_CYNCS)	NA	NA	shared
Solyc09g064640.1	LOW QUALITY:Cold acclimation protein WCOR518, related (AHRD V3.3 *-* Q6L3L4_SOLDE)	NA	NA	shared
Solyc09g074350.1	LOW QUALITY:chromatin remodeling factor17 (AHRD V3.3 --* AT5G18620.2)	NA	NA	shared
Solyc09g075880.3	CheY-like two-component responsive regulator family protein (AHRD V3.3 --* AT4G18020.9)	NA	NA	shared
Solyc09g090710.3	pfkB-like carbohydrate kinase family protein (AHRD V3.3 --* AT5G43910.2)	NA	NA	shared
Solyc10g047390.1	LOW QUALITY:Ycf1 (AHRD V3.3 *-* A0A0U1ZJ99_SOLCI)	NA	NA	shared
Solyc10g050670.1	LOW QUALITY:LOB domain-containing protein 7 (AHRD V3.3 --* AT1G72980.1)	NA	NA	shared
Solyc10g050720.2	LOW QUALITY:50S ribosomal protein L2, chloroplastic (AHRD V3.3 --* RK2_DIOEL)	NA	NA	shared
Solyc10g078325.1	MSCS-like 2 (AHRD V3.3 --* AT5G10490.3)	NA	NA	shared
Solyc10g081570.2	Marmande	NA	NA	shared
Solyc10g085285.1	Chalcone and stilbene synthase family protein (AHRD V3.3 --* AT4G00040.1)	NA	NA	shared
Solyc11g006160.2	Ethylene receptor homolog (AHRD V3.3 *-* Q9XET9_SOLLC)	NA	NA	shared
Solyc11g021020.1	Proteinase inhibitor II (AHRD V3.3 *-* B3F0C1_TOBAC)	NA	NA	shared
Solyc11g021140.1	Acyl-CoA N-acyltransferase with RING/FYVE/PHD-type zinc finger domain-containing protein (AHRD V3.3 --* AT2G27980.1)	NA	NA	shared
Solyc11g021170.1	S-adenosyl-L-methionine-dependent methyltransferases superfamily protein (AHRD V3.3 --* AT4G13330.6)	NA	NA	shared
Solyc11g021260.1	Ycf1 (AHRD V3.3 *-* A0A0U1ZG15_SOLCE)	NA	NA	shared
Solyc11g021270.1	Ycf1 (AHRD V3.3 *-* V5NDV5_9SOLN)	NA	NA	shared
Solyc11g027645.1	Ribosomal RNA small subunit methyltransferase B (AHRD V3.3 --* W9QFJ5_9ROSA)	NA	NA	shared
Solyc11g044610.1	NAD(P)H-quinone oxidoreductase chain 4, chloroplastic (AHRD V3.3 --* NU4C_AGRST)	NA	NA	shared
Solyc11g064957.1	Vacuolar iron transporter like 4 (AHRD V3.3 --* A0A0B2NPW9_GLYSO)	NA	NA	shared
Solyc11g072760.1	Chitinase (AHRD V3.3 *** G7KL79_MEDTR)	NA	NA	shared
Solyc12g009925.1	Glutamyl-tRNA reductase 2, chloroplastic (AHRD V3.3 --* HEM12_ARATH)	NA	NA	shared
Solyc12g010310.2	Zinc finger CCCH domain-containing protein 32 (AHRD V3.3 --* C3H32_ORYSJ)	NA	NA	shared
Solyc12g017268.1	Sec23/Sec24 protein transport family protein (AHRD V3.3 --* AT4G14160.2)	NA	NA	shared
Solyc12g019370.1	LOW QUALITY:Movement protein (AHRD V3.3 *-* A0A151UGG0_CAJCA)	NA	NA	shared
Solyc12g021160.1	LOW QUALITY:cysteine-rich RLK (RECEPTOR-like protein kinase) 29 (AHRD V3.3 --* AT4G21410.3)	NA	NA	shared
Solyc12g035875.1	30S ribosomal protein S3, chloroplastic (AHRD V3.3 --* RR3_ACOCL)	NA	NA	shared
Solyc12g038350.2	UDP-glucose 6-dehydrogenase 1 (AHRD V3.3 --* UGDH1_SOYBN)	NA	NA	shared
Solyc12g038570.2	Clathrin assembly family protein (AHRD V3.3 *-* B9IKX9_POPTR)	NA	NA	shared
Solyc12g042100.2	RING/FYVE/PHD zinc finger superfamily protein (AHRD V3.3 --* AT1G43770.3)	NA	NA	shared
Solyc12g042120.2	potassium transporter 2 (AHRD V3.3 --* AT2G40540.5)	NA	NA	shared
Solyc04g009435.1	NAC domain protein (AHRD V3.3 *** Q6RH27_SOLLC)	AT1G01720	NAC (No Apical Meristem) domain transcriptional regulator superfamily protein	shared
Solyc02g036430.2	NAC domain protein, (AHRD V3.3 *** A0A061EDT4_THECC)	AT1G65910	NAC domain containing protein 28	shared
Solyc10g083450.2	NAC domain protein (AHRD V3.3 *** A0JBY8_9ASPA)	AT1G77450	NAC domain containing protein 32	shared
Solyc02g086770.3	Cinnamoyl-CoA reductase (AHRD V3.3 *** A0A172WBP6_DAUCA)	AT5G14700	NAD(P)-binding Rossmann-fold superfamily protein	shared
Solyc06g083470.3	NAD(P)-binding Rossmann-fold superfamily protein (AHRD V3.3 *** AT5G06060.1),Pfam:PF13561	AT5G06060	NAD(P)-binding Rossmann-fold superfamily protein	shared
Solyc10g086390.2	NAD(P)-binding Rossmann-fold superfamily protein (AHRD V3.3 *** AT5G02540.1)	AT5G02540	NAD(P)-binding Rossmann-fold superfamily protein	shared
Solyc01g017210.1	NAD(P)H-quinone oxidoreductase subunit 3, chloroplastic (AHRD V3.3 *** NU3C_LEMMI)	ATCG00440	NADH:ubiquinone/plastoquinone oxidoreductase, chain 3 protein	shared
Solyc02g037540.2	Disease resistance protein (AHRD V3.3 *** W9R405_9ROSA)	AT4G27220	NB-ARC domain-containing disease resistance protein	shared
Solyc06g008770.2	CNL4	AT3G46730	NB-ARC domain-containing disease resistance protein	shared
Solyc06g075510.3	APETALA2e	AT3G45650	nitrate excretion transporter1	shared
Solyc01g100850.3	ABC transporter family protein (AHRD V3.3 *** A0A097P9U5_HEVBR)	AT5G02270	non-intrinsic ABC protein 9	shared
Solyc02g093330.3	Nuclear pore complex Nup98-Nup96 (AHRD V3.3 *-* A0A0B0NED3_GOSAR)	AT1G10390	Nucleoporin autopeptidase	shared
Solyc01g095930.3	O-acyltransferase WSD1-like protein (AHRD V3.3 *** A0A0B0P708_GOSAR)	AT5G53390	O-acyltransferase (WSD1-like) family protein	shared
Solyc07g053890.3	O-acyltransferase WSD1 (AHRD V3.3 *** A0A151TQI5_CAJCA)	AT3G49190	O-acyltransferase (WSD1-like) family protein	shared
Solyc10g078510.2	Glucan endo-1,3-beta-glucosidase, putative (AHRD V3.3 *** B9SHH6_RICCO)	AT1G64760	O-Glycosyl hydrolases family 17 protein	shared
Solyc12g041960.2	O-methyltransferase (AHRD V3.3 *** A0A1B4Z3W3_9ROSA)	AT4G35160	O-methyltransferase family protein	shared
Solyc07g008920.3	Oxysterol-binding protein-like (AHRD V3.3 *** A0A0K9NXU5_ZOSMR)	AT5G57240	OSBP(oxysterol binding protein)-related protein 4C	shared
Solyc06g005475.1	Outer envelope pore protein 16, chloroplastic (AHRD V3.3 *-* A0A0K9PH60_ZOSMR)	AT2G28900	outer plastid envelope protein 16-1	shared
Solyc02g031940.2	Pathogen-like protein (AHRD V3.3 *** A0A172WBY3_NICBE)	AT1G78780	pathogenesis-related family protein	shared
Solyc03g026050.3	Terminal flower 1 (AHRD V3.3 *** G7ZV36_MEDTR)	AT5G62040	PEBP (phosphatidylethanolamine-binding protein) family protein	shared
Solyc01g079130.2	Pectin lyase-like superfamily protein (AHRD V3.3 *** AT1G02460.1)	AT1G02460	Pectin lyase-like superfamily protein	shared
Solyc10g007520.2	Pentatricopeptide repeat-containing protein (AHRD V3.3 *** A0A118K158_CYNCS)	AT3G14580	Pentatricopeptide repeat (PPR) superfamily protein	shared
Solyc10g079840.2	Peptide chain release factor 2 (AHRD V3.3 *** A0A0B0MIC9_GOSAR)	AT3G57190	peptide chain release factor, putative	shared
Solyc06g082040.2	PHD finger transcription factor (AHRD V3.3 *-* AT5G58610.3)	AT5G58610	PHD finger transcription factor, putative	shared
Solyc09g007910.3	Phenylalanine ammonia-lyase (AHRD V3.3 *** PAL5_SOLLC)	AT2G37040	PHE ammonia lyase 1	shared
Solyc03g121420.3	Inorganic pyrophosphatase 2 (AHRD V3.3 *** A0A0B2S4R2_GLYSO)	AT1G73010	phosphate starvation-induced gene 2	shared
Solyc02g086650.3	Phosphoenolpyruvate/phosphate translocator (AHRD V3.3 *** A0A0D3QJC6_CAMSI)	AT3G01550	phosphoenolpyruvate (pep)/phosphate translocator 2	shared
Solyc04g006970.3	Phosphoenolpyruvate carboxylase (AHRD V3.3 *** A6YM33_RICCO)	AT1G68750	phosphoenolpyruvate carboxylase 4	shared
Solyc04g072605.1	ATP-dependent 6-phosphofructokinase (AHRD V3.3 *** K4BTP5_SOLLC)	AT4G26270	phosphofructokinase 3	shared
Solyc02g082630.2	Phosphoinositide phosphatase SAC1 (AHRD V3.3 *-* G7K029_MEDTR)	AT5G66020	Phosphoinositide phosphatase family protein	shared
Solyc02g082770.3	Phosphoinositide phosphatase family protein (AHRD V3.3 *-* AT3G51460.1)	AT3G51460	Phosphoinositide phosphatase family protein	shared
Solyc07g014730.3	Phospholipase A2 (AHRD V3.3 *** Q5CCT8_TOBAC)	AT2G06925	Phospholipase A2 family protein	shared
Solyc09g064580.2	photosystem II reaction center protein M (AHRD V3.3 *** ATCG00220.1)	ATCG00220	photosystem II reaction center protein M	shared
Solyc01g098820.3	Phototropic-responsive NPH3 family protein, putative (AHRD V3.3 *** A0A061FBG1_THECC)	AT5G10250	Phototropic-responsive NPH3 family protein	shared
Solyc02g092610.3	Phototropic-responsive NPH3 family protein (AHRD V3.3 *-* AT5G67385.5)	AT5G67385	Phototropic-responsive NPH3 family protein	shared
Solyc03g031860.3	Phytoene synthase 1	AT5G17230	PHYTOENE SYNTHASE	shared
Solyc01g057480.2	PIF1 helicase (AHRD V3.3 *-* G7J5Q6_MEDTR)	AT5G28780	PIF1 helicase	shared
Solyc09g005730.3	Plant protein 1589 of unknown function (AHRD V3.3 *** AT3G55240.1)	AT3G55240	Plant protein 1589 of unknown function	shared
Solyc06g072730.3	WEB family protein, chloroplastic (AHRD V3.3 *** A0A0B2RLR4_GLYSO)	AT5G16730	Plant protein of unknown function (DUF827)	shared
Solyc01g081640.3	DUF936 family protein (AHRD V3.3 *** A2Q3C0_MEDTR)	AT2G31920	Plant protein of unknown function (DUF936)	shared
Solyc01g104320.3	Plastid-lipid associated protein PAP / fibrillin family protein (AHRD V3.3 *-* A0A061DXD4_THECC)	AT3G26070	Plastid-lipid associated protein PAP / fibrillin family protein	shared
Solyc11g005340.2	Plastid-lipid associated protein PAP / fibrillin family protein (AHRD V3.3 *** AT5G09820.2)	AT5G09820	Plastid-lipid associated protein PAP / fibrillin family protein	shared
Solyc03g044625.1	PLATZ transcription factor family protein (AHRD V3.3 *** AT4G17900.2)	AT4G17900	PLATZ transcription factor family protein	shared
Solyc05g005720.3	Potassium transporter family protein (AHRD V3.3 *** AT1G60160.1)	AT1G60160	Potassium transporter family protein	shared
Solyc05g016420.1	Protein phosphatase 2C family protein (AHRD V3.3 *** AT4G28400.2)	AT2G20630	PP2C induced by AVRRPM1	shared
Solyc01g110960.3	Prefoldin chaperone subunit family protein, putative (AHRD V3.3 *** A0A061F1S1_THECC)	AT5G27330	Prefoldin chaperone subunit family protein	shared
Solyc01g095550.2	LOW QUALITY:Protein kinase family protein (AHRD V3.3 *** AT5G41730.2)	AT5G41730	Protein kinase family protein	shared
Solyc01g111570.3	Kinase family protein (AHRD V3.3 *** B9H1A0_POPTR)	AT2G16750	Protein kinase protein with adenine nucleotide alpha hydrolases-like domain	shared
Solyc04g026230.1	Kinase like protein (AHRD V3.3 *-* O23334_ARATH)	AT4G14780	Protein kinase superfamily protein	shared
Solyc04g026235.1	Kinase family protein (AHRD V3.3 *** B9GH93_POPTR)	AT3G01490	Protein kinase superfamily protein	shared
Solyc06g007355.1	LOW QUALITY:Protein kinase (AHRD V3.3 *-* A0A0K9NJ18_ZOSMR)	AT4G31170	Protein kinase superfamily protein	shared
Solyc06g083500.3	Kinase family protein (AHRD V3.3 *** D7L628_ARALL)	AT3G07070	Protein kinase superfamily protein	shared
Solyc09g083260.3	Ion channel pollux-like protein (AHRD V3.3 *** A0A072VLS8_MEDTR)	AT5G43745	Protein of unknown function (DUF1012)	shared
Solyc06g051680.1	Protein EARLY FLOWERING 4 (AHRD V3.3 *-* A0A0B2RPG0_GLYSO)	AT2G40080	Protein of unknown function (DUF1313)	shared
Solyc03g065200.3	DUF1336 family protein (AHRD V3.3 *-* G7L343_MEDTR)	AT3G29180	Protein of unknown function (DUF1336)	shared
Solyc06g054310.1	LOW QUALITY:Fantastic four-like protein (AHRD V3.3 *** G7IE53_MEDTR)	AT5G19260	Protein of unknown function (DUF3049)	shared
Solyc06g074270.1	LOW QUALITY:FANTASTIC four-like protein (DUF3049) (AHRD V3.3 *-* AT5G22390.1)	AT5G22390	Protein of unknown function (DUF3049)	shared
Solyc06g062795.1	LOW QUALITY:DUF3511 domain protein (AHRD V3.3 --* G7LI91_MEDTR)	AT5G11970	Protein of unknown function (DUF3511)	shared
Solyc08g081680.2	Protein LURP-one-related 17 (AHRD V3.3 *** A0A0B2R169_GLYSO)	AT5G41590	Protein of unknown function (DUF567)	shared
Solyc03g078650.3	Lipase (AHRD V3.3 *** G7JAK3_MEDTR)	AT5G05840	Protein of unknown function (DUF620)	shared
Solyc04g009980.3	LIGHT-DEPENDENT SHORT HYPOCOTYLS-like protein (DUF640) (AHRD V3.3 *** AT1G07090.1)	AT1G07090	Protein of unknown function (DUF640)	shared
Solyc12g096310.2	plant/protein (Protein of unknown function, DUF599) (AHRD V3.3 *** AT5G10580.4)	AT4G31330	Protein of unknown function, DUF599	shared
Solyc01g111790.2	Serine/threonine protein phosphatase 2A regulatory subunit B (AHRD V3.3 *** B9IFU5_POPTR)	AT5G25510	Protein phosphatase 2A regulatory B subunit family protein	shared
Solyc03g096670.3	Protein phosphatase 2C (AHRD V3.3 *** Q8RVG0_TOBAC)	AT3G11410	protein phosphatase 2CA	shared
Solyc03g081240.3	Two-component response regulator-like protein (AHRD V3.3 *** W9RA17_9ROSA)	AT5G24470	pseudo-response regulator 5	shared
Solyc03g098010.3	phosphate starvation inducible gene TPSI1	AT3G17790	purple acid phosphatase 17	shared
Solyc04g056380.3	Seipin (AHRD V3.3 *** A0A0B0N0V2_GOSAR)	AT5G16460	Putative adipose-regulatory protein (Seipin)	shared
Solyc10g084150.2	Cytokinin riboside 5'-monophosphate phosphoribohydrolase (AHRD V3.3 *** I0IUQ2_SOLLC)	AT2G28305	Putative lysine decarboxylase family protein	shared
Solyc09g008840.3	Pyruvate kinase family protein (AHRD V3.3 *** AT3G52990.1)	AT3G52990	Pyruvate kinase family protein	shared
Solyc01g096220.3	Ras-related protein RABA3 (AHRD V3.3 *** A0A0B2Q7Y9_GLYSO)	AT1G01200	RAB GTPase homolog A3	shared
Solyc10g052470.1	Myb family transcription factor family protein (AHRD V3.3 *** B9H0R6_POPTR)	AT4G39250	RAD-like 1	shared
Solyc01g109690.1	MYB transcription factor (AHRD V3.3 *** F2WZH1_VITPS)	AT1G75250	RAD-like 6	shared
Solyc02g071790.2	Leucine-rich repeat receptor-like protein kinase (AHRD V3.3 *-* C0LGM8_ARATH)	AT3G23120	receptor like protein 38	shared
Solyc01g099430.3	ATP-dependent DNA helicase (AHRD V3.3 --* C1N4S4_MICPC)	AT5G27680	RECQ helicase SIM	shared
Solyc01g099480.3	RecQ family ATP-dependent DNA helicase (AHRD V3.3 *-* G7I8P0_MEDTR)	AT5G27680	RECQ helicase SIM	shared
Solyc05g052950.3	Regulator of chromosome condensation (RCC1) family protein (AHRD V3.3 *** AT3G55580.1)	AT3G55580	Regulator of chromosome condensation (RCC1) family protein	shared
Solyc09g011160.3	Regulator of chromosome condensation (RCC1) family protein (AHRD V3.3 *** AT3G53830.3)	AT3G53830	Regulator of chromosome condensation (RCC1) family protein	shared
Solyc06g066690.3	Regulator of Vps4 activity in the MVB pathway protein, putative (AHRD V3.3 *-* A0A061GBK3_THECC)	AT1G79910	Regulator of Vps4 activity in the MVB pathway protein	shared
Solyc03g114440.1	Ethylene-responsive transcription factor (AHRD V3.3 *-* W9SE25_9ROSA)	AT5G19790	related to AP2 11	shared
Solyc04g005470.3	Remorin family protein (AHRD V3.3 *-* AT1G13920.4)	AT1G13920	Remorin family protein	shared
Solyc04g015520.3	Remorin family protein (AHRD V3.3 *** A0A061F452_THECC)	AT3G57540	Remorin family protein	shared
Solyc05g014710.3	Remorin family protein (AHRD V3.3 *** A0A061E752_THECC)	AT1G67590	Remorin family protein	shared
Solyc11g011310.2	Rhamnogalacturonate lyase family protein (AHRD V3.3 *** AT2G22620.2)	AT2G22620	Rhamnogalacturonate lyase family protein	shared
Solyc01g094610.3	Rop guanine nucleotide exchange factor, putative (AHRD V3.3 *** B9RDS3_RICCO)	AT4G00460	RHO guanyl-nucleotide exchange factor 3	shared
Solyc11g027775.1	40S ribosomal protein S5 (AHRD V3.3 *-* RS5_NICPL)	AT3G11940	ribosomal protein 5A	shared
Solyc03g058210.2	50S ribosomal protein L14, chloroplastic (AHRD V3.3 *** RK14_TOBAC)	ATCG00780	ribosomal protein L14	shared
Solyc03g058213.1	50S ribosomal protein L16, chloroplastic (AHRD V3.3 *** RK16_GUIAB)	ATCG00790	ribosomal protein L16	shared
Solyc02g011985.1	50S ribosomal protein L2, chloroplastic (AHRD V3.3 *** RK2_WHEAT)	ATCG01310	ribosomal protein L2	shared
Solyc05g023730.1	LOW QUALITY:50S ribosomal protein L2, chloroplastic (AHRD V3.3 *-* RK2_SOLBU)	ATCG01310	ribosomal protein L2	shared
Solyc06g009985.1	LOW QUALITY:50S ribosomal protein L2, chloroplastic (AHRD V3.3 *-* A0A0N7BD77_CORYI)	ATCG01310	ribosomal protein L2	shared
Solyc10g018610.1	50S ribosomal protein L2, chloroplastic (AHRD V3.3 *-* RK2_TOBAC)	ATCG01310	ribosomal protein L2	shared
Solyc10g047090.2	LOW QUALITY:50S ribosomal protein L2, chloroplastic (AHRD V3.3 *-* RK2_SOLBU)	ATCG01310	ribosomal protein L2	shared
Solyc04g049673.1	50S ribosomal protein L20, chloroplastic (AHRD V3.3 *** RK20_CARPA)	ATCG00660	ribosomal protein L20	shared
Solyc02g011980.1	50S ribosomal protein L23, chloroplastic (AHRD V3.3 *-* A0A190LKY7_9MAGN)	ATCG01300	ribosomal protein L23	shared
Solyc12g033030.1	50S ribosomal protein L23, chloroplastic (AHRD V3.3 *** RK23_ATRBE)	ATCG01300	ribosomal protein L23	shared
Solyc12g033090.2	50S ribosomal protein L23, chloroplastic (AHRD V3.3 *** RK23_ATRBE)	ATCG01300	ribosomal protein L23	shared
Solyc05g008840.2	RING/U-box superfamily protein (AHRD V3.3 *** AT1G73760.1)	AT1G73760	RING/U-box superfamily protein	shared
Solyc07g055330.3	RING/U-box superfamily protein, putative (AHRD V3.3 *** A0A061ECA4_THECC)	AT3G58720	RING/U-box superfamily protein	shared
Solyc11g005310.1	RING/U-box superfamily protein (AHRD V3.3 *** AT1G49230.1)	AT1G49230	RING/U-box superfamily protein	shared
Solyc12g007320.1	RING/U-box superfamily protein (AHRD V3.3 *** AT4G28890.1)	AT4G28890	RING/U-box superfamily protein	shared
Solyc02g088117.1	RNA-binding KH domain-containing protein (AHRD V3.3 *-* AT5G15270.3)	AT5G15270	RNA-binding KH domain-containing protein	shared
Solyc01g095190.2	LOW QUALITY:S-adenosyl-L-methionine-dependent methyltransferases superfamily protein (AHRD V3.3 *** AT4G01240.1)	AT4G01240	S-adenosyl-L-methionine-dependent methyltransferases superfamily protein	shared
Solyc04g063210.3	Caffeoyl-CoA O-methyltransferase (AHRD V3.3 *** CAMT_MESCR)	AT4G26220	S-adenosyl-L-methionine-dependent methyltransferases superfamily protein	shared
Solyc02g079550.2	Serine/threonine-protein kinase (AHRD V3.3 *** B9H1U5_POPTR)	AT1G11330	S-locus lectin protein kinase family protein	shared
Solyc01g110970.3	Auxin responsive SAUR protein (AHRD V3.3 *-* A0A103Y0W3_CYNCS)	AT4G38840	SAUR-like auxin-responsive protein family	shared
Solyc05g056430.2	Small auxin up-regulated RNA56	AT5G53590	SAUR-like auxin-responsive protein family	shared
Solyc08g079150.1	SAUR-like auxin-responsive protein family (AHRD V3.3 *** AT4G22620.1)	AT4G22620	SAUR-like auxin-responsive protein family	shared
Solyc01g005290.3	Sec14p-like phosphatidylinositol transfer family protein (AHRD V3.3 *-* AT1G14820.3)	AT1G14820	Sec14p-like phosphatidylinositol transfer family protein	shared
Solyc01g005295.1	Sec14p-like phosphatidylinositol transfer family protein (AHRD V3.3 *-* AT1G14820.3)	AT1G14820	Sec14p-like phosphatidylinositol transfer family protein	shared
Solyc08g078680.3	Sec14p-like phosphatidylinositol transfer family protein (AHRD V3.3 *** AT5G47510.4)	AT5G47510	Sec14p-like phosphatidylinositol transfer family protein	shared
Solyc10g005740.2	Sec14p-like phosphatidylinositol transfer family protein (AHRD V3.3 *** AT1G55690.5)	AT1G55690	Sec14p-like phosphatidylinositol transfer family protein	shared
Solyc12g008460.2	Senescence/dehydration-associated protein-like protein (AHRD V3.3 *** AT4G15450.1)	AT4G15450	Senescence/dehydration-associated protein-related	shared
Solyc11g005230.1	LOW QUALITY:Protein SENSITIVITY TO RED LIGHT REDUCED 1 (AHRD V3.3 *** SRR1_ARATH)	AT5G59560	sensitivity to red light reduced protein (SRR1)	shared
Solyc07g008500.1	Histone-lysine N-methyltransferase (AHRD V3.3 *-* A0A0K9P7Y1_ZOSMR)	AT1G76710	SET domain group 26	shared
Solyc01g087690.2	Sigma factor (AHRD V3.3 *** A0A0G2STQ4_9ROSI)	AT5G13730	sigma factor 4	shared
Solyc03g007370.3	Sigma factor (AHRD V3.3 *** A0A0G2STU5_9ROSI)	AT5G24120	sigma factor E	shared
Solyc05g005280.3	Poly [ADP-ribose] polymerase (AHRD V3.3 *** K4BW59_SOLLC)	AT1G23550	similar to RCD one 2	shared
Solyc09g055940.3	Sodium Bile acid symporter family (AHRD V3.3 *** AT3G25410.1)	AT3G25410	Sodium Bile acid symporter family	shared
Solyc08g060920.3	IDS4-like	AT5G20150	SPX domain gene 1	shared
Solyc07g053810.3	Squamosa promoter binding protein 4	AT2G33810	squamosa promoter binding protein-like 3	shared
Solyc11g039530.1	LOW QUALITY:30S ribosomal protein S3, chloroplastic (AHRD V3.3 *-* RR3_SOLTU)	ATCG00800	structural constituent of ribosome	shared
Solyc12g035880.1	30S ribosomal protein S3, chloroplastic (AHRD V3.3 *-* RR3_SOLTU)	ATCG00800	structural constituent of ribosome	shared
Solyc08g079970.1	Subtilisin-like protease (AHRD V3.3 *** Q9LWA3_SOLLC)	AT1G04110	Subtilase family protein	shared
Solyc04g081810.3	Subtilisin-like protease (AHRD V3.3 *** A0A0B2PIS0_GLYSO)	AT1G20160	Subtilisin-like serine endopeptidase family protein	shared
Solyc09g092130.3	Sucrose-phosphate synthase (AHRD V3.3 *** A0A0U1ZVB4_LYCBA)	AT1G04920	sucrose phosphate synthase 3F	shared
Solyc03g006550.3	Terpene synthase (AHRD V3.3 *** A0A076GH23_POPTR)	AT1G61120	terpene synthase 04	shared
Solyc12g006530.2	Terpene cyclase/mutase family member (AHRD V3.3 *** M1BMW3_SOLTU)	AT1G78950	Terpenoid cyclases family protein	shared
Solyc06g068130.3	Tetratricopeptide repeat (TPR)-like superfamily protein (AHRD V3.3 *-* AT5G20190.1)	AT5G20190	Tetratricopeptide repeat (TPR)-like superfamily protein	shared
Solyc08g076730.3	Tetratricopeptide repeat (TPR)-like superfamily protein (AHRD V3.3 *** AT4G17940.1)	AT4G17940	Tetratricopeptide repeat (TPR)-like superfamily protein	shared
Solyc09g064630.3	Tetratricopeptide repeat (TPR)-like superfamily protein (AHRD V3.3 *-* AT4G17940.1)	AT4G17940	Tetratricopeptide repeat (TPR)-like superfamily protein	shared
Solyc05g006830.3	Thioredoxin family protein (AHRD V3.3 *** B9IJS4_POPTR)	AT5G39950	thioredoxin 2	shared
Solyc06g075650.3	tonoplast intrinsic protein 1.2	AT4G01470	tonoplast intrinsic protein 1;3	shared
Solyc02g066980.1	LOW QUALITY:TPX2 (targeting protein for Xklp2) protein family (AHRD V3.3 *** AT5G15510.1)	AT3G01015	TPX2 (targeting protein for Xklp2) protein family	shared
Solyc08g065830.3	Transcription factor jumonji (jmjC) domain-containing protein (AHRD V3.3 *-* AT3G07610.1)	AT3G07610	Transcription factor jumonji (jmjC) domain-containing protein	shared
Solyc09g005610.3	transcription factor-like protein (AHRD V3.3 *** AT1G58330.1)	AT1G58330	transcription factor-related	shared
Solyc10g085210.2	transcription factor-like protein (AHRD V3.3 *** AT1G58330.1)	AT1G58330	transcription factor-related	shared
Solyc01g109120.3	Transducin/WD40 repeat-like superfamily protein (AHRD V3.3 *** AT3G18950.1)	AT3G18950	Transducin/WD40 repeat-like superfamily protein	shared
Solyc04g072890.3	Transducin/WD40 repeat protein (AHRD V3.3 *-* G8A379_MEDTR)	AT1G78070	Transducin/WD40 repeat-like superfamily protein	shared
Solyc04g072895.1	Transducin/WD40 repeat-like superfamily protein (AHRD V3.3 *** AT1G78070.1)	AT1G78070	Transducin/WD40 repeat-like superfamily protein	shared
Solyc04g076720.2	WD repeat domain phosphoinositide-interacting 3 (AHRD V3.3 *-* A0A0B0P0U0_GOSAR)	AT3G62770	Transducin/WD40 repeat-like superfamily protein	shared
Solyc05g024160.3	Pyruvate dehydrogenase E1 component subunit beta (AHRD V3.3 *** B6T6H3_MAIZE)	AT5G50850	Transketolase family protein	shared
Solyc03g071650.2	LOW QUALITY:TRICHOME BIREFRINGENCE-LIKE 11 (AHRD V3.3 *-* AT5G19160.2)	AT5G19160	TRICHOME BIREFRINGENCE-LIKE 11	shared
Solyc03g006220.3	Trichome birefringence-like protein (AHRD V3.3 *** G7IKB9_MEDTR)	AT1G29050	TRICHOME BIREFRINGENCE-LIKE 38	shared
Solyc04g049340.3	Tryptophan/tyrosine permease (AHRD V3.3 *** A0A061FPP3_THECC)	AT5G19500	Tryptophan/tyrosine permease	shared
Solyc05g053400.2	Glycosyltransferase (AHRD V3.3 *** A0A0A1WC49_NICAT)	AT3G50740	UDP-glucosyl transferase 72E1	shared
Solyc05g006140.1	Glycosyltransferase (AHRD V3.3 *** A0A068TY11_COFCA)	AT1G24100	UDP-glucosyl transferase 74B1	shared
Solyc04g008330.1	Glycosyltransferase (AHRD V3.3 *** M1CVU0_SOLTU)	AT2G31750	UDP-glucosyl transferase 74D1	shared
Solyc09g092490.3	Glycosyltransferase (AHRD V3.3 *-* B6EWX4_LYCBA)	AT1G05530	UDP-glucosyl transferase 75B2	shared
Solyc10g085230.2	ripening-related mRNA 1b	AT5G59580	UDP-glucosyl transferase 76E1	shared
Solyc04g074330.3	Glycosyltransferase (AHRD V3.3 *** K4BTX1_SOLLC)	AT1G22380	UDP-glucosyl transferase 85A3	shared
Solyc01g105350.2	Glycosyltransferase (AHRD V3.3 *** K4B2A5_SOLLC)	AT1G22340	UDP-glucosyl transferase 85A7	shared
Solyc02g088517.1	Glycosyltransferase (AHRD V3.3 *** A0A022RUH0_ERYGU)	AT3G16520	UDP-glucosyl transferase 88A1	shared
Solyc07g043490.1	UDP-Gal:Tomatidine Galactosyltransferase	AT2G15490	UDP-glycosyltransferase 73B4	shared
Solyc01g006670.2	Glycosyltransferase (AHRD V3.3 *** K4D910_SOLLC)	AT5G12890	UDP-Glycosyltransferase superfamily protein	shared
Solyc02g063000.3	Glycosyltransferase (AHRD V3.3 *** K4B6I8_SOLLC)	AT2G18570	UDP-Glycosyltransferase superfamily protein	shared
Solyc04g016200.1	Glycosyltransferase (AHRD V3.3 *** Q8RXA4_SOLLC)	AT2G36780	UDP-Glycosyltransferase superfamily protein	shared
Solyc05g053890.2	Glycosyltransferase (AHRD V3.3 *** K4C268_SOLLC)	AT2G36780	UDP-Glycosyltransferase superfamily protein	shared
Solyc07g043500.1	Glycosyltransferase (AHRD V3.3 *** K4CEK8_SOLLC)	AT5G49690	UDP-Glycosyltransferase superfamily protein	shared
Solyc09g059170.2	Glycosyltransferase (AHRD V3.3 *** M1C989_SOLTU)	AT5G54010	UDP-Glycosyltransferase superfamily protein	shared
Solyc10g085870.1	Glycosyltransferase (AHRD V3.3 *** M1BFM3_SOLTU)	AT2G36780	UDP-Glycosyltransferase superfamily protein	shared
Solyc11g066670.1	Glycosyltransferase (AHRD V3.3 *** K4D9S4_SOLLC)	AT2G36770	UDP-Glycosyltransferase superfamily protein	shared
Solyc11g012590.2	CASP-like protein (AHRD V3.3 *** M1B0Y6_SOLTU)	AT2G35760	Uncharacterised protein family (UPF0497)	shared
Solyc01g104780.3	Vacuolar iron transporter family protein (AHRD V3.3 *** A0A061DXK2_THECC)	AT3G43660	Vacuolar iron transporter (VIT) family protein	shared
Solyc04g051540.3	WRKY transcription factor 13	AT4G39410	WRKY DNA-binding protein 13	shared
Solyc01g058540.3	WRKY transcription factor 47	AT2G47260	WRKY DNA-binding protein 23	shared
Solyc10g084380.1	WRKY transcription factor 44	AT2G37260	WRKY family transcription factor family protein	shared
Solyc11g066270.2	xyloglucan endotransglucosylase-hydrolase 6	AT2G36870	xyloglucan endotransglucosylase/hydrolase 32	shared
Solyc01g009550.1	LOW QUALITY:Ycf1 (AHRD V3.3 *-* A0A0U1ZK62_SOLHA)	ATCG01130	Ycf1 protein	shared
Solyc01g020200.1	LOW QUALITY:Ycf1 (AHRD V3.3 *-* A0A0C5C9W8_SOLLC)	ATCG01130	Ycf1 protein	shared
Solyc02g011820.2	Ycf1 (AHRD V3.3 *-* A0A0C5C9W8_SOLLC)	ATCG01130	Ycf1 protein	shared
Solyc02g011850.2	Ycf1 (AHRD V3.3 *-* A0A0U1ZHZ0_9SOLN)	ATCG01130	Ycf1 protein	shared
Solyc04g045540.1	Ycf1 (AHRD V3.3 *** A0A168RD69_SOLME)	ATCG01000	Ycf1 protein	shared
Solyc04g045550.1	LOW QUALITY:Ycf1 (AHRD V3.3 *-* A0A0U1ZG15_SOLCE)	ATCG01130	Ycf1 protein	shared
Solyc05g016220.1	LOW QUALITY:Ycf1 (AHRD V3.3 *-* A0A0U1ZJ99_SOLCI)	ATCG01130	Ycf1 protein	shared
Solyc05g047440.1	LOW QUALITY:Ycf1 protein (AHRD V3.3 *-* ATCG01130.1)	ATMG00370	Ycf1 protein	shared
Solyc07g041680.2	LOW QUALITY:Ycf1 (AHRD V3.3 *-* A0A0N7CFU2_SOLTU)	ATCG01130	Ycf1 protein	shared
Solyc08g016000.1	LOW QUALITY:Ycf1 (AHRD V3.3 *-* A0A0U1ZJ99_SOLCI)	ATCG01130	Ycf1 protein	shared
Solyc10g018580.1	LOW QUALITY:Ycf1 (AHRD V3.3 *-* A0A0U1ZK62_SOLHA)	ATCG01130	Ycf1 protein	shared
Solyc10g049470.1	Ycf1 (AHRD V3.3 *-* A0A0U1ZJ99_SOLCI)	ATCG01130	Ycf1 protein	shared
Solyc10g062330.1	Ycf1 (AHRD V3.3 *-* A0A0N7CFU2_SOLTU)	ATCG01000	Ycf1 protein	shared
Solyc11g021240.2	Ycf1 (AHRD V3.3 *-* A0A0U1ZHZ0_9SOLN)	ATCG01130	Ycf1 protein	shared
Solyc11g021280.1	Ycf1 (AHRD V3.3 *-* A0A0U1ZJ99_SOLCI)	ATCG01130	Ycf1 protein	shared
Solyc11g021290.2	Ycf1 (AHRD V3.3 *-* A0A0U1ZK62_SOLHA)	ATCG01130	Ycf1 protein	shared
Solyc11g021300.1	LOW QUALITY:Ycf1 (AHRD V3.3 *-* A0A0U1ZG15_SOLCE)	ATCG01130	Ycf1 protein	shared
Solyc11g021310.1	Ycf1 (AHRD V3.3 *-* A0A0U1ZKJ5_SOLPI)	ATCG01130	Ycf1 protein	shared
Solyc11g044670.1	Ycf1 protein (AHRD V3.3 *-* ATCG01130.1)	ATCG01000	Ycf1 protein	shared
Solyc11g044680.2	Ycf1 (AHRD V3.3 *-* A0A140G1X7_TOBAC)	ATCG01130	Ycf1 protein	shared
Solyc11g044690.1	Ycf1 (AHRD V3.3 *-* A0A0N7CKU9_SOLNI)	ATCG01130	Ycf1 protein	shared
Solyc12g035550.1	LOW QUALITY:Ycf1 (AHRD V3.3 *-* A0A0U1ZJ99_SOLCI)	ATCG01130	Ycf1 protein	shared
Solyc12g036550.2	Ycf1 (AHRD V3.3 *** A0A0U1ZFC2_SOLCI)	ATCG01000	Ycf1 protein	shared
Solyc01g107460.2	LOW QUALITY:neuronal PAS domain protein (AHRD V3.3 *** AT5G64190.2)	AT2G15020	0	uniq in slsdg33
Solyc01g109250.2	LOW QUALITY:DUF4228 domain protein (AHRD V3.3 *** I3SPG4_MEDTR)	AT4G37240	0	uniq in slsdg33
Solyc02g072220.1	LOW QUALITY:DUF1685 family protein (AHRD V3.3 *** A0A072V475_MEDTR)	AT2G42760	0	uniq in slsdg33
Solyc02g080110.3	Transmembrane protein, putative (AHRD V3.3 *** A0A072VQK9_MEDTR)	AT4G21215	0	uniq in slsdg33
Solyc04g026250.1	LOW QUALITY:Transmembrane protein, putative (AHRD V3.3 *** G7K1C9_MEDTR)	AT1G23530	0	uniq in slsdg33
Solyc04g077160.1	myb-like protein X (AHRD V3.3 *-* AT4G33740.5)	AT4G33740	0	uniq in slsdg33
Solyc05g012230.3	Protein POLAR LOCALIZATION DURING ASYMMETRIC DIVISION AND REDISTRIBUTION (AHRD V3.3 --* A0A199UMI0_ANACO)	AT5G61040	0	uniq in slsdg33
Solyc05g013860.3	sieve element occlusion protein (AHRD V3.3 *** AT1G67790.1)	AT3G01680	0	uniq in slsdg33
Solyc08g006420.3	nucleoporin (AHRD V3.3 *** AT4G31570.3)	AT4G31570	0	uniq in slsdg33
Solyc08g067885.1	Copper ion binding protein (AHRD V3.3 *** A0A0K9PL91_ZOSMR)	AT2G25670	0	uniq in slsdg33
Solyc08g078840.3	root meristem growth factor (AHRD V3.3 --* AT4G16515.1)	AT4G16515	0	uniq in slsdg33
Solyc09g009810.1	LOW QUALITY:TSA: Wollemia nobilis Ref_Wollemi_Transcript_15479_650 transcribed RNA sequence (AHRD V3.3 *** A0A0C9RS79_9SPER)	AT3G10120	0	uniq in slsdg33
Solyc09g097930.3	dCTP pyrophosphatase 1 (AHRD V3.3 *** A0A0B0PZH5_GOSAR)	AT3G25400	0	uniq in slsdg33
Solyc10g084230.2	DUF1685 family protein (AHRD V3.3 *** G7LJH7_MEDTR)	AT2G42760	0	uniq in slsdg33
Solyc12g042117.1	Transmembrane protein, putative (AHRD V3.3 *-* G7K2H5_MEDTR)	AT5G67550	0	uniq in slsdg33
Solyc01g067620.3	2-oxoglutarate (2OG) and Fe(II)-dependent oxygenase superfamily protein (AHRD V3.3 *** AT3G21420.1)	AT3G21420	2-oxoglutarate (2OG) and Fe(II)-dependent oxygenase superfamily protein	uniq in slsdg33
Solyc03g116290.2	2-oxoglutarate and Fe(II)-dependent oxygenase superfamily protein, putative (AHRD V3.3 *** A0A061FWB6_THECC)	AT4G16330	2-oxoglutarate (2OG) and Fe(II)-dependent oxygenase superfamily protein	uniq in slsdg33
Solyc06g069900.3	2-oxoglutarate and Fe(II)-dependent oxygenase superfamily protein, putative (AHRD V3.3 *** A0A061FWB6_THECC)	AT5G05600	2-oxoglutarate (2OG) and Fe(II)-dependent oxygenase superfamily protein	uniq in slsdg33
Solyc07g043420.3	2-oxoglutarate-dependent dioxygenase 2	AT5G24530	2-oxoglutarate (2OG) and Fe(II)-dependent oxygenase superfamily protein	uniq in slsdg33
Solyc11g007900.2	2-oxoglutarate (2OG) and Fe(II)-dependent oxygenase superfamily protein (AHRD V3.3 *-* AT2G36690.2)	AT2G36690	2-oxoglutarate (2OG) and Fe(II)-dependent oxygenase superfamily protein	uniq in slsdg33
Solyc03g097030.3	4-coumarate--CoA ligase	AT1G65060	4-coumarate:CoA ligase 3	uniq in slsdg33
Solyc12g007160.2	ABIL1-like protein (AHRD V3.3 *** B7FL53_MEDTR)	AT3G49290	ABL interactor-like protein 2	uniq in slsdg33
Solyc06g062400.2	Protein CHUP1, chloroplastic (AHRD V3.3 *** A0A0B2RCB9_GLYSO)	AT1G52080	actin binding protein family	uniq in slsdg33
Solyc04g014600.3	Adenine nucleotide alpha hydrolases-like superfamily protein (AHRD V3.3 *** AT3G03270.2)	AT3G03270	Adenine nucleotide alpha hydrolases-like superfamily protein	uniq in slsdg33
Solyc09g089570.3	Agenet domain protein (AHRD V3.3 *** G7JN46_MEDTR)	AT5G42670	Agenet domain-containing protein	uniq in slsdg33
Solyc04g014960.3	Alpha 1,4-glycosyltransferase family protein (AHRD V3.3 *-* Q2MGS1_MEDTR)	AT4G19900	alpha 1,4-glycosyltransferase family protein	uniq in slsdg33
Solyc02g062610.3	alpha/beta-Hydrolases superfamily protein (AHRD V3.3 *** AT4G36530.2)	AT4G36530	alpha/beta-Hydrolases superfamily protein	uniq in slsdg33
Solyc07g032180.3	Abhydrolase domain-containing protein 4 (AHRD V3.3 *** A0A0B2SN17_GLYSO)	AT4G24160	alpha/beta-Hydrolases superfamily protein	uniq in slsdg33
Solyc07g056250.3	Protein glycosylationmyb-like TTH transcriptional regulator (AHRD V3.3 *** A0A077SLH0_9MAGN)	AT5G50890	alpha/beta-Hydrolases superfamily protein	uniq in slsdg33
Solyc11g011990.2	plastid terminal oxidase	AT4G22260	Alternative oxidase family protein	uniq in slsdg33
Solyc02g090170.3	B3 domain-containing protein (AHRD V3.3 *** A0A199VWS3_ANACO)	AT4G33280	AP2/B3-like transcriptional factor family protein	uniq in slsdg33
Solyc12g042170.2	ADP-ribosylation factor GTPase-activating protein (AHRD V3.3 *-* G5DWI4_SILLA)	AT5G13300	ARF GTPase-activating protein	uniq in slsdg33
Solyc12g042177.1	ADP-ribosylation factor GTPase-activating protein (AHRD V3.3 *-* G5DWI4_SILLA),Pfam:PF16746	AT5G13300	ARF GTPase-activating protein	uniq in slsdg33
Solyc01g098670.2	Kinesin-like protein (AHRD V3.3 *-* K4B0Q4_SOLLC)	AT3G63480	ATP binding microtubule motor family protein	uniq in slsdg33
Solyc02g091130.3	ATP synthase subunit beta (AHRD V3.3 *** A0A0V0IJL8_SOLCH)	AT5G08680	ATP synthase alpha/beta family protein	uniq in slsdg33
Solyc02g090545.1	Calcium-transporting ATPase (AHRD V3.3 *** M5X6S2_PRUPE)	AT3G63380	ATPase E1-E2 type family protein / haloacid dehalogenase-like hydrolase family protein	uniq in slsdg33
Solyc01g020230.3	Replication factor C subunit 3 (AHRD V3.3 *** RFC3_ARATH)	AT5G27740	ATPase family associated with various cellular activities (AAA)	uniq in slsdg33
Solyc12g027720.1	LOW QUALITY:ATP synthase subunit b, chloroplastic (AHRD V3.3 *-* ATPF_NICTO)	ATCG00130	ATPase, F0 complex, subunit B/B', bacterial/chloroplast	uniq in slsdg33
Solyc03g005355.1	Auxin-responsive protein (AHRD V3.3 *** G9HPW7_SOLLC)	AT1G04240	AUX/IAA transcriptional regulator family protein	uniq in slsdg33
Solyc04g080600.3	DnaJ domain-containing protein (AHRD V3.3 *-* A0A103XYN8_CYNCS)	AT1G75310	auxin-like 1 protein	uniq in slsdg33
Solyc02g063400.2	Auxin induced-like protein (AHRD V3.3 *** A0A0K9NX81_ZOSMR)	AT5G47530	Auxin-responsive family protein	uniq in slsdg33
Solyc07g053140.3	Zinc finger, B-box (AHRD V3.3 *** A0A103Y7X2_CYNCS)	AT4G27310	B-box type zinc finger family protein	uniq in slsdg33
Solyc07g045185.1	CONSTANS-like zinc finger protein (AHRD V3.3 *-* A0A023GS52_SOYBN)	AT5G48250	B-box type zinc finger protein with CCT domain	uniq in slsdg33
Solyc02g091800.3	basic helix-loop-helix (bHLH) DNA-binding superfamily protein (AHRD V3.3 *** AT4G37850.2)	AT4G37850	basic helix-loop-helix (bHLH) DNA-binding superfamily protein	uniq in slsdg33
Solyc03g120530.3	basic helix-loop-helix (bHLH) DNA-binding superfamily protein (AHRD V3.3 *-* AT4G29100.1)	AT4G29100	basic helix-loop-helix (bHLH) DNA-binding superfamily protein	uniq in slsdg33
Solyc07g018010.3	bHLH transcription factor139	AT5G57150	basic helix-loop-helix (bHLH) DNA-binding superfamily protein	uniq in slsdg33
Solyc08g062780.2	bHLH transcription factor 089	AT2G16910	basic helix-loop-helix (bHLH) DNA-binding superfamily protein	uniq in slsdg33
Solyc10g006640.3	bHLH transcription factor153	AT3G20640	basic helix-loop-helix (bHLH) DNA-binding superfamily protein	uniq in slsdg33
Solyc10g018510.2	bHLH transcription factor 063	AT4G00050	basic helix-loop-helix (bHLH) DNA-binding superfamily protein	uniq in slsdg33
Solyc11g069890.2	BEL1-like homeodomain 8, putative (AHRD V3.3 *** A0A061GYR6_THECC)	AT2G27990	BEL1-like homeodomain 8	uniq in slsdg33
Solyc06g069375.1	Transcription factor BIM2-like protein (AHRD V3.3 *** G7JZB3_MEDTR)	AT1G69010	BES1-interacting Myc-like protein 2	uniq in slsdg33
Solyc01g081173.1	Beta-glucosidase, putative (AHRD V3.3 *-* B9SAQ6_RICCO)	AT1G02850	beta glucosidase 11	uniq in slsdg33
Solyc03g118760.3	Tubulin beta chain (AHRD V3.3 *** TBB_HORVU)	AT5G12250	beta-6 tubulin	uniq in slsdg33
Solyc05g041140.3	Protease inhibitor/seed storage/lipid transfer family protein (AHRD V3.3 *** B9HHI8_POPTR)	AT3G53980	Bifunctional inhibitor/lipid-transfer protein/seed storage 2S albumin superfamily protein	uniq in slsdg33
Solyc03g119390.3	bHLH transcription factor 026	AT1G73830	BR enhanced expression 3	uniq in slsdg33
Solyc01g010410.3	Zinc finger family protein (AHRD V3.3 *** B9HID5_POPTR)	AT1G26610	C2H2-like zinc finger protein	uniq in slsdg33
Solyc04g039960.3	Calcium-binding EF-hand family protein (AHRD V3.3 *-* AT1G29020.2)	AT1G29020	Calcium-binding EF-hand family protein	uniq in slsdg33
Solyc09g092020.3	Calcium-binding EF-hand family protein isoform 3 (AHRD V3.3 *** A0A061EJV0_THECC)	AT3G24110	Calcium-binding EF-hand family protein	uniq in slsdg33
Solyc06g065380.3	Calcium-dependent protein kinase (AHRD V3.3 *** H6UM40_TOBAC)	AT4G09570	calcium-dependent protein kinase 4	uniq in slsdg33
Solyc03g119250.3	Calmodulin binding protein-like, putative (AHRD V3.3 *** A0A061G202_THECC)	AT1G73805	Calmodulin binding protein-like	uniq in slsdg33
Solyc01g005800.3	calmodulin-binding family protein (AHRD V3.3 *** AT3G13600.2)	AT3G13600	calmodulin-binding family protein	uniq in slsdg33
Solyc01g100630.2	Catalase (AHRD V3.3 *-* CATA_SOLAP)	AT4G35090	catalase 2	uniq in slsdg33
Solyc09g010530.3	Cation/H(+) antiporter (AHRD V3.3 *** A0A0K9NMD6_ZOSMR)	AT3G53720	cation/H+ exchanger 20	uniq in slsdg33
Solyc05g053210.3	Non-specific serine/threonine protein kinase (AHRD V3.3 *** K4C201_SOLLC)	AT3G17510	CBL-interacting protein kinase 1	uniq in slsdg33
Solyc03g083400.3	CCT motif family protein (AHRD V3.3 *** A0A061G1S7_THECC)	AT5G53420	CCT motif family protein	uniq in slsdg33
Solyc10g050080.2	Protein kinase superfamily protein (AHRD V3.3 *-* AT3G56760.1)	AT2G41140	CDPK-related kinase 1	uniq in slsdg33
Solyc07g043395.1	Cellulose synthase-like protein (AHRD V3.3 *-* A0A072TVD1_MEDTR)	AT4G24000	cellulose synthase like G2	uniq in slsdg33
Solyc05g053550.3	chalcone synthase 2	AT5G13930	Chalcone and stilbene synthase family protein	uniq in slsdg33
Solyc02g067870.3	chalcone isomerase	AT3G63170	Chalcone-flavanone isomerase family protein	uniq in slsdg33
Solyc05g010320.3	Chalcone-flavonone isomerase family protein (AHRD V3.3 *** K4BXK5_SOLLC)	AT3G55120	Chalcone-flavanone isomerase family protein	uniq in slsdg33
Solyc02g089010.2	Receptor protein kinase, putative (AHRD V3.3 *-* B9RXG1_RICCO)	AT3G21630	chitin elicitor receptor kinase 1	uniq in slsdg33
Solyc09g065620.3	Chlorophyllase (AHRD V3.3 *** W6EIP8_WHEAT)	AT5G43860	chlorophyllase 2	uniq in slsdg33
Solyc03g058220.1	LOW QUALITY:Protein Ycf2 (AHRD V3.3 *-* YCF2_TOBAC)	ATCG01280	Chloroplast Ycf2;ATPase, AAA type, core	uniq in slsdg33
Solyc04g024560.2	Protein Ycf2 (AHRD V3.3 *-* YCF2_TOBAC)	ATCG01280	Chloroplast Ycf2;ATPase, AAA type, core	uniq in slsdg33
Solyc09g031800.1	Protein Ycf2 (AHRD V3.3 *-* YCF2_TOBAC)	ATCG01280	Chloroplast Ycf2;ATPase, AAA type, core	uniq in slsdg33
Solyc10g012230.1	LOW QUALITY:Protein Ycf2 (AHRD V3.3 *-* YCF2_SOLLC)	ATCG01280	Chloroplast Ycf2;ATPase, AAA type, core	uniq in slsdg33
Solyc12g070220.2	LOW QUALITY:Protein Ycf2 (AHRD V3.3 *-* YCF2_SOLLC)	ATCG01280	Chloroplast Ycf2;ATPase, AAA type, core	uniq in slsdg33
Solyc04g054440.2	LOW QUALITY:chromatin remodeling 31 (AHRD V3.3 *-* AT1G05490.1)	AT1G05490	chromatin remodeling 31	uniq in slsdg33
Solyc01g107690.3	ATP-dependent Clp protease ATP-binding subunit ClpX (AHRD V3.3 *-* A0A1D1XQW5_9ARAE)	AT5G53350	CLP protease regulatory subunit X	uniq in slsdg33
Solyc03g025800.3	Heavy metal-associated domain, putative (AHRD V3.3 *-* Q7G2B2_ORYSJ)	AT5G23760	Copper transport protein family	uniq in slsdg33
Solyc10g007040.3	Core-2/I-branching beta-1,6-N-acetylglucosaminyltransferase family protein (AHRD V3.3 *** F4JIW2_ARATH)	AT4G27480	Core-2/I-branching beta-1,6-N-acetylglucosaminyltransferase family protein	uniq in slsdg33
Solyc04g081650.3	Cyclin (AHRD V3.3 *-* G3G857_CAMSI)	AT1G76310	CYCLIN B2;4	uniq in slsdg33
Solyc04g081655.1	Cyclin (AHRD V3.3 *-* G3G857_CAMSI)	AT1G76310	CYCLIN B2;4	uniq in slsdg33
Solyc04g078500.1	cyclinJ18	AT2G01905	cyclin J18	uniq in slsdg33
Solyc01g090800.3	cyclinU2_1	AT3G60550	cyclin p3;2	uniq in slsdg33
Solyc01g108610.3	Cyclin-dependent kinase inhibitor (AHRD V3.3 *** A0A103YKD7_CYNCS)	AT1G49620	Cyclin-dependent kinase inhibitor family protein	uniq in slsdg33
Solyc02g061800.2	Peptidyl-prolyl cis-trans isomerase (AHRD V3.3 *** K4B670_SOLLC)	AT1G53720	cyclophilin 59	uniq in slsdg33
Solyc02g076970.2	Cathepsin B-like cysteine proteinase (AHRD V1 **-* CYSP_SCHMA)%3B contains Interpro domain(s) IPR013128 Peptidase C1A%2C papain	AT5G50260	Cysteine proteinases superfamily protein	uniq in slsdg33
Solyc02g076980.4	cysteine protease	AT3G49340	Cysteine proteinases superfamily protein	uniq in slsdg33
Solyc03g006210.2	Cysteine protease (AHRD V3.3 *** J7GPZ5_SOLCI)	AT3G49340	Cysteine proteinases superfamily protein	uniq in slsdg33
Solyc12g087920.1	Receptor-like protein kinase (AHRD V3.3 *** C6F1T6_SOYBN)	AT4G23150	cysteine-rich RLK (RECEPTOR-like protein kinase) 7	uniq in slsdg33
Solyc02g062050.2	Retrovirus-related Pol polyprotein from transposon TNT 1-94 (AHRD V3.3 *-* A0A151T1T1_CAJCA)	AT4G23160	cysteine-rich RLK (RECEPTOR-like protein kinase) 8	uniq in slsdg33
Solyc04g082940.3	Cysteine/histidine-rich C1 domain protein (AHRD V3.3 *** G7IA18_MEDTR)	AT1G20990	Cysteine/Histidine-rich C1 domain family protein	uniq in slsdg33
Solyc03g120060.2	castasterone 26-hydroxylase	AT2G26710	Cytochrome P450 superfamily protein	uniq in slsdg33
Solyc08g076253.1	Cytochrome P450 (AHRD V3.3 *-* Q9M7M3_CAPAN)	AT3G48290	cytochrome P450, family 71, subfamily A, polypeptide 24	uniq in slsdg33
Solyc08g075165.1	Cytochrome P450 (AHRD V3.3 *** S4UX03_SALMI)	AT3G26210	cytochrome P450, family 71, subfamily B, polypeptide 23	uniq in slsdg33
Solyc10g087013.1	Cytochrome P450 (AHRD V3.3 *** Q9AVQ2_SOLTU)	AT3G26310	cytochrome P450, family 71, subfamily B, polypeptide 35	uniq in slsdg33
Solyc01g088760.3	Cytochrome P450, putative (AHRD V3.3 *** A0A061DWV1_THECC)	AT5G24910	cytochrome P450, family 714, subfamily A, polypeptide 1	uniq in slsdg33
Solyc07g055560.3	Cytochrome P450 (AHRD V3.3 *** A0A124SAX2_CYNCS)	AT3G14690	cytochrome P450, family 72, subfamily A, polypeptide 15	uniq in slsdg33
Solyc11g006590.2	Cytochrome P450, putative (AHRD V3.3 *** B9R857_RICCO)	AT4G31500	cytochrome P450, family 83, subfamily B, polypeptide 1	uniq in slsdg33
Solyc12g010030.2	Leucine aminopeptidase (AHRD V3.3 *-* U3PLK3_TOBAC)	AT2G24200	Cytosol aminopeptidase family protein	uniq in slsdg33
Solyc05g053070.3	Dehydrin family protein, expressed (AHRD V3.3 *-* Q40711_ORYSJ)	AT1G54410	dehydrin family protein	uniq in slsdg33
Solyc04g064470.2	Squamosa promoter-binding-like protein (AHRD V3.3 *-* A0A072V7X4_MEDTR)	AT1G75270	dehydroascorbate reductase 2	uniq in slsdg33
Solyc07g008640.2	Leucine-rich repeat receptor-like protein kinase family protein (AHRD V3.3 *** AT2G33170.2)	AT2G34930	disease resistance family protein / LRR family protein	uniq in slsdg33
Solyc07g055820.2	LOW QUALITY:Leucine-rich repeat receptor-like protein kinase family protein (AHRD V3.3 *** AT4G08850.2)	AT2G34930	disease resistance family protein / LRR family protein	uniq in slsdg33
Solyc09g007710.3	Disease resistance protein (TIR-NBS-LRR class) family (AHRD V3.3 *** AT5G36930.2)	AT5G36930	Disease resistance protein (TIR-NBS-LRR class) family	uniq in slsdg33
Solyc01g111230.3	Dirigent protein (AHRD V3.3 *** K4B3Y5_SOLLC)	AT2G21100	Disease resistance-responsive (dirigent-like protein) family protein	uniq in slsdg33
Solyc12g010450.2	Protein phosphatase 2c, putative (AHRD V3.3 *** B9T2N5_RICCO)	AT2G25620	DNA-binding protein phosphatase 1	uniq in slsdg33
Solyc01g017380.1	DNA-directed RNA polymerase subunit (AHRD V3.3 *-* A0A0K1ZCY1_9LAMI)	ATCG00180	DNA-directed RNA polymerase family protein	uniq in slsdg33
Solyc12g062650.1	LOW QUALITY:DNA-directed RNA polymerase subunit beta'' (AHRD V3.3 *-* RPOC2_SOLLC)	ATCG00170	DNA-directed RNA polymerase family protein	uniq in slsdg33
Solyc12g096910.1	LOW QUALITY:DNA-directed RNA polymerase subunit beta'' (AHRD V3.3 *-* RPOC2_SOLBU)	ATCG00170	DNA-directed RNA polymerase family protein	uniq in slsdg33
Solyc05g050820.3	DNAJ (AHRD V3.3 *** A0A061DUH3_THECC)	AT5G22060	DNAJ homologue 2	uniq in slsdg33
Solyc05g055200.3	Double Clp-N motif-containing P-loop nucleoside triphosphate hydrolases superfamily protein, putative (AHRD V3.3 *-* A0A061FQV4_THECC)	AT3G52490	Double Clp-N motif-containing P-loop nucleoside triphosphate hydrolases superfamily protein	uniq in slsdg33
Solyc07g018070.3	Double Clp-N motif-containing P-loop nucleoside triphosphate hydrolases superfamily protein, putative (AHRD V3.3 *** A0A061GSB6_THECC)	AT4G29920	Double Clp-N motif-containing P-loop nucleoside triphosphate hydrolases superfamily protein	uniq in slsdg33
Solyc09g014250.3	MYB transcription factor (AHRD V3.3 *** Q66RN1_HEVBR)	AT2G38090	Duplicated homeodomain-like superfamily protein	uniq in slsdg33
Solyc10g076820.2	Myb family transcription factor family protein (AHRD V3.3 *** B9HCK2_POPTR)	AT2G38090	Duplicated homeodomain-like superfamily protein	uniq in slsdg33
Solyc03g097100.1	Calmodulin, putative (AHRD V3.3 *** B9S227_RICCO)	AT3G03000	EF hand calcium-binding protein family	uniq in slsdg33
Solyc09g074540.3	Cytochrome b6-f complex subunit 6 (AHRD V3.3 *** K4CV31_SOLLC)	ATCG00590	electron carriers	uniq in slsdg33
Solyc12g006460.2	Cytochrome P450 (AHRD V3.3 *** A0A124SDJ5_CYNCS)	AT2G32440	ent-kaurenoic acid hydroxylase 2	uniq in slsdg33
Solyc01g109610.3	Erythronate-4-phosphate dehydrogenase family protein (AHRD V3.3 *** G7JG61_MEDTR)	AT1G19400	Erythronate-4-phosphate dehydrogenase family protein	uniq in slsdg33
Solyc10g081430.2	exostosin family protein (AHRD V3.3 *** AT3G45400.1)	AT3G45400	exostosin family protein	uniq in slsdg33
Solyc08g077900.3	Expansin-like protein (AHRD V3.3 *** W9S0F1_9ROSA)	AT4G17030	expansin-like B1	uniq in slsdg33
Solyc02g087270.2	F-box family protein (AHRD V3.3 *-* A0A061EN61_THECC)	AT3G23880	F-box and associated interaction domains-containing protein	uniq in slsdg33
Solyc07g064260.2	F-box/RNI superfamily protein (AHRD V3.3 *-* A0A061F6J1_THECC)	AT3G59190	F-box/RNI-like superfamily protein	uniq in slsdg33
Solyc02g070070.1	FAD-binding Berberine family protein (AHRD V3.3 *** AT2G34790.1)	AT2G34790	FAD-binding Berberine family protein	uniq in slsdg33
Solyc08g063130.3	FAD/NAD(P)-binding oxidoreductase family protein (AHRD V3.3 *** AT5G05320.1)	AT5G05320	FAD/NAD(P)-binding oxidoreductase family protein	uniq in slsdg33
Solyc10g083520.2	RAB6-interacting golgin (DUF662) (AHRD V3.3 *** AT2G27740.1)	AT3G52920	Family of unknown function (DUF662)	uniq in slsdg33
Solyc11g067170.2	Fatty acyl-CoA reductase (AHRD V3.3 *-* K4D9X4_SOLLC)	AT3G44540	fatty acid reductase 4	uniq in slsdg33
Solyc09g090350.3	Long-chain-alcohol oxidase (AHRD V3.3 *** K4CW61_SOLLC)	AT3G23410	fatty alcohol oxidase 3	uniq in slsdg33
Solyc11g013110.2	Flavonol synthase (AHRD V3.3 *** C0LUV3_SOLTU)	AT5G08640	flavonol synthase 1	uniq in slsdg33
Solyc07g062280.3	Gamma-glutamyl hydrolase (AHRD V3.3 *** X5HY53_IPONI)	AT1G78680	gamma-glutamyl hydrolase 2	uniq in slsdg33
Solyc07g038160.3	GATA transcription factor (AHRD V3.3 *** A0A0K9PML1_ZOSMR)	AT5G49300	GATA transcription factor 16	uniq in slsdg33
Solyc02g071675.1	GDSL esterase/lipase (AHRD V3.3 *-* A0A172Q426_CITMA)	AT2G19050	GDSL-like Lipase/Acylhydrolase superfamily protein	uniq in slsdg33
Solyc02g070430.3	Gibberellin 2 oxidase (AHRD V3.3 *** Q53C60_NEROL)	AT1G30040	gibberellin 2-oxidase	uniq in slsdg33
Solyc05g006160.3	Gibberellin-regulated family protein (AHRD V3.3 *** G7LER1_MEDTR)	AT5G14920	Gibberellin-regulated family protein	uniq in slsdg33
Solyc01g008690.3	GDP-mannose transporter (AHRD V3.3 *** M5VX95_PRUPE)	AT2G13650	golgi nucleotide sugar transporter 1	uniq in slsdg33
Solyc09g018460.1	LOW QUALITY:GRAS5	AT4G08250	GRAS family transcription factor	uniq in slsdg33
Solyc08g013840.3	Haloacid dehalogenase-like hydrolase (AHRD V3.3 *** G7JYQ1_MEDTR)	AT2G38740	Haloacid dehalogenase-like hydrolase (HAD) superfamily protein	uniq in slsdg33
Solyc06g052055.1	Heat shock protein 70 (AHRD V3.3 *-* Q9M4E8_CUCSA)	AT5G42020	Heat shock protein 70 (Hsp 70) family protein	uniq in slsdg33
Solyc03g043640.3	Heavy metal transport/detoxification superfamily protein (AHRD V3.3 *** AT5G17450.1)	AT5G17450	Heavy metal transport/detoxification superfamily protein	uniq in slsdg33
Solyc04g054500.3	metal ion binding protein	AT4G39700	Heavy metal transport/detoxification superfamily protein	uniq in slsdg33
Solyc02g067790.3	High affinity nitrate transporter (AHRD V3.3 *** A0A0G2UMZ8_9ROSA)	AT5G14570	high affinity nitrate transporter 2.7	uniq in slsdg33
Solyc09g091960.3	High mobility group B-like protein (AHRD V3.3 *** G7KWP7_MEDTR)	AT1G04880	HMG (high mobility group) box protein with ARID/BRIGHT DNA-binding domain	uniq in slsdg33
Solyc03g082550.3	Homeobox leucine zipper (AHRD V3.3 *-* J7FWS7_ROSRU)	AT2G46680	homeobox 7	uniq in slsdg33
Solyc08g065420.3	bell-like homeodomain protein 4	AT4G32980	homeobox gene 1	uniq in slsdg33
Solyc09g066050.2	Homeobox leucine zipper protein (AHRD V3.3 *** A0A072UAM9_MEDTR)	AT1G73360	homeodomain GLABROUS 11	uniq in slsdg33
Solyc01g109670.3	Transcription factor RADIALIS (AHRD V3.3 *-* RAD_ANTMA)	AT2G21650	Homeodomain-like superfamily protein	uniq in slsdg33
Solyc04g079600.3	Homeodomain-like superfamily protein (AHRD V3.3 *** AT5G42630.1)	AT5G42630	Homeodomain-like superfamily protein	uniq in slsdg33
Solyc11g030475.1	Mannosyltransferase (AHRD V3.3 *-* K4AYT1_SOLLC)	AT1G02145	homolog of asparagine-linked glycosylation 12	uniq in slsdg33
Solyc07g053010.2	NBS-LRR type disease resistance protein (AHRD V3.3 *** Q19PJ0_POPTR)	AT3G50950	HOPZ-ACTIVATED RESISTANCE 1	uniq in slsdg33
Solyc01g009220.3	Heat shock family protein (AHRD V3.3 *-* U5GG61_POPTR)	AT5G20970	HSP20-like chaperones superfamily protein	uniq in slsdg33
Solyc01g102960.3	Heat-shock protein, putative (AHRD V3.3 *** B9S5K5_RICCO)	AT4G10250	HSP20-like chaperones superfamily protein	uniq in slsdg33
Solyc03g113170.2	16.6 kDa heat shock protein (AHRD V3.3 *** A0A0B2SUX8_GLYSO)	AT5G20970	HSP20-like chaperones superfamily protein	uniq in slsdg33
Solyc06g076540.1	Class I heat shock protein (AHRD V3.3 *** F4YBC5_SOLNI)	AT1G07400	HSP20-like chaperones superfamily protein	uniq in slsdg33
Solyc07g064020.3	Heat shock protein (AHRD V3.3 *** A7UNS9_9ROSI)	AT5G54660	HSP20-like chaperones superfamily protein	uniq in slsdg33
Solyc10g086680.1	Class I heat shock protein (AHRD V3.3 *** F4YBC5_SOLNI)	AT1G07400	HSP20-like chaperones superfamily protein	uniq in slsdg33
Solyc11g020330.1	leer-sHSP small heat shock protein	AT4G10250	HSP20-like chaperones superfamily protein	uniq in slsdg33
Solyc12g056560.2	Heat shock family protein (AHRD V3.3 *-* B9GTI4_POPTR)	AT1G76770	HSP20-like chaperones superfamily protein	uniq in slsdg33
Solyc12g088200.2	Inositol-tetrakisphosphate 1-kinase (AHRD V3.3 *** K4DGP1_SOLLC)	AT4G08170	Inositol 1,3,4-trisphosphate 5/6-kinase family protein	uniq in slsdg33
Solyc04g079820.3	Inositol polyphosphate 5-phosphatase I (AHRD V3.3 *** G7I5A8_MEDTR)	AT1G47510	inositol polyphosphate 5-phosphatase 11	uniq in slsdg33
Solyc08g081670.2	Ethylene-responsive transcription factor (AHRD V3.3 *-* W9RJN8_9ROSA)	AT1G68550	Integrase-type DNA-binding superfamily protein	uniq in slsdg33
Solyc12g014130.2	SUN-like protein 33	AT3G15050	IQ-domain 10	uniq in slsdg33
Solyc10g079240.2	SUN-like protein 1	AT5G03960	IQ-domain 12	uniq in slsdg33
Solyc10g076670.2	2-oxoglutarate (2OG) and Fe(II)-dependent oxygenase superfamily protein (AHRD V3.3 *** AT5G05600.1)	AT3G55970	jasmonate-regulated gene 21	uniq in slsdg33
Solyc01g103600.3	Jasmonate ZIM-domain protein 4 (AHRD V3.3 *** T1WMV9_TOBAC)	AT1G19180	jasmonate-zim-domain protein 1	uniq in slsdg33
Solyc06g059970.3	TPI	AT5G20240	K-box region and MADS-box transcription factor family protein	uniq in slsdg33
Solyc06g082570.2	Kinase interacting (KIP1-like) family protein (AHRD V3.3 *-* G7K0U4_MEDTR)	AT5G58320	Kinase interacting (KIP1-like) family protein	uniq in slsdg33
Solyc11g010630.3	Kinase interacting (KIP1-like) family protein (AHRD V3.3 *** AT2G22560.1)	AT2G22560	Kinase interacting (KIP1-like) family protein	uniq in slsdg33
Solyc01g091430.2	ATP-dependent DNA helicase 2 subunit KU80 (AHRD V3.3 *-* K4AZ75_SOLLC)	AT1G48050	Ku80 family protein	uniq in slsdg33
Solyc05g052340.3	Laccase (AHRD V3.3 *** K4C1R5_SOLLC)	AT5G05390	laccase 12	uniq in slsdg33
Solyc07g063490.3	Root cap/late embryogenesis-like protein (AHRD V3.3 *** A0A072VAI7_MEDTR)	AT5G54370	Late embryogenesis abundant (LEA) protein-related	uniq in slsdg33
Solyc12g010820.2	Late embryogenesis abundant protein-like (AHRD V3.3 *-* Q9LF88_ARATH)	AT2G42560	late embryogenesis abundant domain-containing protein / LEA domain-containing protein	uniq in slsdg33
Solyc02g077970.3	Late embryogenesis abundant, putative (AHRD V3.3 *** B9RBC1_RICCO)	AT5G44310	Late embryogenesis abundant protein (LEA) family protein	uniq in slsdg33
Solyc03g116390.3	Late embryogenesis abundant protein (AHRD V3.3 *** E1AZA3_SOLLC)	AT3G15670	Late embryogenesis abundant protein (LEA) family protein	uniq in slsdg33
Solyc01g096940.3	Receptor-like kinase 17 (AHRD V3.3 *** A5A0Y6_SOLCH)	AT3G03770	Leucine-rich repeat protein kinase family protein	uniq in slsdg33
Solyc02g072440.3	Leucine-rich repeat protein kinase family protein, putative (AHRD V3.3 *** A0A061F9W0_THECC)	AT3G47570	Leucine-rich repeat protein kinase family protein	uniq in slsdg33
Solyc10g081420.2	Protein kinase (AHRD V3.3 *** Q2HVC0_MEDTR)	AT3G03770	Leucine-rich repeat protein kinase family protein	uniq in slsdg33
Solyc12g009190.2	Receptor-like kinase, putative (AHRD V3.3 *** A0A072TMR8_MEDTR)	AT3G42880	Leucine-rich repeat protein kinase family protein	uniq in slsdg33
Solyc09g091400.3	Receptor protein kinase (AHRD V3.3 *** Q9FEU2_PINSY)	AT3G24240	Leucine-rich repeat receptor-like protein kinase family protein	uniq in slsdg33
Solyc02g071800.3	Receptor-like protein kinase (AHRD V3.3 *** B9I1R1_POPTR)	AT1G53440	Leucine-rich repeat transmembrane protein kinase	uniq in slsdg33
Solyc02g071860.3	Receptor-like protein kinase (AHRD V3.3 *** B9I1R1_POPTR)	AT1G07650	Leucine-rich repeat transmembrane protein kinase	uniq in slsdg33
Solyc06g036467.1	Protein kinase, putative (AHRD V3.3 *-* Q1EP57_MUSBA)	AT1G53440	Leucine-rich repeat transmembrane protein kinase	uniq in slsdg33
Solyc03g083370.3	Lipase class 3 family protein (AHRD V3.3 *** B9GXJ5_POPTR)	AT5G24230	Lipase class 3-related protein	uniq in slsdg33
Solyc05g048740.3	LOB domain-containing protein, putative (AHRD V3.3 *** B9SK21_RICCO)	AT1G07900	LOB domain-containing protein 1	uniq in slsdg33
Solyc01g073670.3	Major facilitator superfamily protein (AHRD V3.3 *** AT3G60070.5),Pfam:PF13347	AT3G60070	Major facilitator superfamily protein	uniq in slsdg33
Solyc03g120570.3	Major facilitator superfamily protein (AHRD V3.3 *** AT1G52190.1)	AT1G52190	Major facilitator superfamily protein	uniq in slsdg33
Solyc06g005470.3	Metallothionein-like protein type 2 (AHRD V3.3 *** MT2Z_SOLLC)	AT3G09390	metallothionein 2A	uniq in slsdg33
Solyc08g081890.3	ABC transporter family protein (AHRD V3.3 *** U5FPJ5_POPTR)	AT3G59140	multidrug resistance-associated protein 14	uniq in slsdg33
Solyc06g009710.3	R2R3MYB transcription factor 111	AT5G49330	myb domain protein 111	uniq in slsdg33
Solyc03g005570.3	MYB family protein (AHRD V3.3 *** A0A067KW19_JATCU)	AT3G23250	myb domain protein 15	uniq in slsdg33
Solyc08g079270.3	R2R3MYB transcription factor 42	AT4G12350	myb domain protein 42	uniq in slsdg33
Solyc03g112390.3	R2R3MYB transcription factor 86	AT5G26660	myb domain protein 86	uniq in slsdg33
Solyc10g085620.2	Myb family transcription factor APL (AHRD V3.3 *** A0A0B2R6R9_GLYSO)	AT5G18240	myb-related protein 1	uniq in slsdg33
Solyc06g011550.3	Myosin-11 (AHRD V3.3 *-* MYO11_ARATH)	AT1G54560	Myosin family protein with Dil domain	uniq in slsdg33
Solyc08g080780.3	Myosin heavy chain-related protein, putative (AHRD V3.3 *** A0A061GCE0_THECC)	AT1G63300	Myosin heavy chain-related protein	uniq in slsdg33
Solyc00g007160.2	Retrovirus-related Pol polyprotein from transposon TNT 1-94 (AHRD V3.3 *-* A0A151SHE2_CAJCA)	NA	NA	uniq in slsdg33
Solyc00g010525.1	Tetratricopeptide repeat (TPR)-like superfamily protein (AHRD V3.3 --* AT5G46400.3)	NA	NA	uniq in slsdg33
Solyc00g011170.1	LOW QUALITY:Senescence-associated protein, putative (AHRD V3.3 *-* A0A072TJH8_MEDTR)	NA	NA	uniq in slsdg33
Solyc00g012430.1	LOW QUALITY:alpha/beta-Hydrolases superfamily protein (AHRD V3.3 --* AT5G27320.1)	NA	NA	uniq in slsdg33
Solyc00g018970.1	LOW QUALITY:CYCLIN B2-4 (AHRD V3.3 --* AT1G76310.4)	NA	NA	uniq in slsdg33
Solyc00g294233.1	ATP-dependent RNA helicase SUV3, mitochondrial (AHRD V3.3 --* SUV3M_ORYSJ)	NA	NA	uniq in slsdg33
Solyc01g008478.1	histone-lysine N-methyltransferase SUVR5 (AHRD V3.3 --* AT2G23740.6)	NA	NA	uniq in slsdg33
Solyc01g017050.1	LOW QUALITY:ATP synthase subunit alpha, chloroplastic (AHRD V3.3 --* ATPA_IPOPU)	NA	NA	uniq in slsdg33
Solyc01g020500.2	Tetratricopeptide repeat (TPR)-like superfamily protein (AHRD V3.3 --* AT1G53600.2)	NA	NA	uniq in slsdg33
Solyc01g080320.2	phospholipase D gamma 3 (AHRD V3.3 --* AT4G11840.1)	NA	NA	uniq in slsdg33
Solyc01g096205.1	DNAJ heat shock N-terminal domain-containing protein (AHRD V3.3 --* AT1G65280.2)	NA	NA	uniq in slsdg33
Solyc01g106173.1	PDI-like 2-3 (AHRD V3.3 --* AT2G32920.1)	NA	NA	uniq in slsdg33
Solyc01g112175.1	RNA polymerase II transcriptional coactivator (AHRD V3.3 --* G7JC59_MEDTR)	NA	NA	uniq in slsdg33
Solyc02g031700.2	F-box protein 7 (AHRD V3.3 --* AT1G21760.2)	NA	NA	uniq in slsdg33
Solyc02g038670.2	Tetratricopeptide repeat 5 (AHRD V3.3 *** A0A0B0NMW4_GOSAR)	NA	NA	uniq in slsdg33
Solyc02g049100.1	LOW QUALITY:G2/mitotic-specific cyclin-1 (AHRD V3.3 --* CCNB1_MEDSA)	NA	NA	uniq in slsdg33
Solyc02g067275.1	Dehydration-responsive protein RD22 (AHRD V3.3 --* K7XKT0_SOLTU)	NA	NA	uniq in slsdg33
Solyc02g071660.3	Cysteine/Histidine-rich C1 domain family protein (AHRD V3.3 --* AT3G27473.1)	NA	NA	uniq in slsdg33
Solyc02g071685.1	Lipase, GDSL (AHRD V3.3 --* A0A103Y1R3_CYNCS)	NA	NA	uniq in slsdg33
Solyc02g084280.3	Nuclear pore complex protein Nup98b (AHRD V3.3 *-* W6JLG1_NICBE)	NA	NA	uniq in slsdg33
Solyc02g086467.1	Histone H4 (AHRD V3.3 --* A0A0D3DSU9_BRAOL)	NA	NA	uniq in slsdg33
Solyc02g088983.1	LOW QUALITY:Arginine/serine-rich splicing factor, putative (AHRD V3.3 --* B9RNP5_RICCO)	NA	NA	uniq in slsdg33
Solyc02g089495.1	Eukaryotic translation initiation factor 3 subunit D (AHRD V3.3 --* M8BC43_AEGTA)	NA	NA	uniq in slsdg33
Solyc03g044250.1	LOW QUALITY:NAD(P)H-quinone oxidoreductase chain 4, chloroplastic (AHRD V3.3 --* NU4C_TOBAC)	NA	NA	uniq in slsdg33
Solyc03g051590.2	LOW QUALITY:Protein Ycf2 (AHRD V3.3 --* YCF2_LEMMI)	NA	NA	uniq in slsdg33
Solyc03g059140.3	Ion channel CASTOR (AHRD V3.3 *-* A0A1D1ZL57_9ARAE)	NA	NA	uniq in slsdg33
Solyc03g117830.1	LOW QUALITY:Signal anchor, putative (AHRD V3.3 --* A0A072UJ16_MEDTR)	NA	NA	uniq in slsdg33
Solyc04g016040.1	LOW QUALITY:lipid-binding serum glycoprotein family protein (AHRD V3.3 --* AT3G20270.3)	NA	NA	uniq in slsdg33
Solyc04g054770.1	LOW QUALITY:Ubiquitin carboxyl-terminal hydrolase family protein (AHRD V3.3 --* AT5G45790.2)	NA	NA	uniq in slsdg33
Solyc04g078960.1	Plasma membrane ATPase (AHRD V3.3 --* PMA1_DUNBI)	NA	NA	uniq in slsdg33
Solyc05g010775.1	CDK-activating kinase 1AT (AHRD V3.3 --* AT4G28980.3)	NA	NA	uniq in slsdg33
Solyc05g011840.3	AGC (cAMP-dependent, cGMP-dependent and protein kinase C) kinase family protein (AHRD V3.3 --* AT4G14350.4)	NA	NA	uniq in slsdg33
Solyc05g021510.2	Amino acid/polyamine transporter I (AHRD V3.3 --* A0A124SH48_CYNCS)	NA	NA	uniq in slsdg33
Solyc05g021540.2	Alcohol dehydrogenase (AHRD V3.3 *-* Q4LAW8_CAPCH)	NA	NA	uniq in slsdg33
Solyc05g047700.2	NBS-LRR resistance protein-like protein (AHRD V3.3 *-* A1Y9R1_SOLLC)	NA	NA	uniq in slsdg33
Solyc06g005210.2	LOW QUALITY:Cytochrome P450 like_TBP (AHRD V3.3 *-* O04892_TOBAC)	NA	NA	uniq in slsdg33
Solyc06g009890.2	PHD finger family protein (AHRD V3.3 --* AT3G17460.1)	NA	NA	uniq in slsdg33
Solyc06g048750.3	Unknown protein (AHRD V3.3 )	NA	NA	uniq in slsdg33
Solyc06g050830.1	Pectinesterase (AHRD V3.3 --* A0A103YG83_CYNCS)	NA	NA	uniq in slsdg33
Solyc07g026620.3	TUBULIN-FOLDING COFACTOR E family protein (AHRD V3.3 --* B9IQ98_POPTR)	NA	NA	uniq in slsdg33
Solyc07g039190.3	nuclear pore complex protein (DUF3414) (AHRD V3.3 --* AT5G51200.3)	NA	NA	uniq in slsdg33
Solyc07g039287.1	protein kinase family protein (AHRD V3.3 --* AT4G12020.9)	NA	NA	uniq in slsdg33
Solyc08g013770.3	F-box/RNI-like superfamily protein, putative (AHRD V3.3 *-* A0A061GGX0_THECC)	NA	NA	uniq in slsdg33
Solyc08g074865.1	GATA transcription factor-like protein (AHRD V3.3 --* A0A0X7YHI0_SOLTU)	NA	NA	uniq in slsdg33
Solyc09g005800.2	LOW QUALITY:cysteine-rich RLK (RECEPTOR-like protein kinase) 22 (AHRD V3.3 --* AT4G23300.1)	NA	NA	uniq in slsdg33
Solyc09g056370.1	LOW QUALITY:Acyl-CoA N-acyltransferase with RING/FYVE/PHD-type zinc finger protein (AHRD V3.3 --* AT3G14980.6)	NA	NA	uniq in slsdg33
Solyc09g059125.1	CW14 protein (DUF1336) (AHRD V3.3 --* AT1G59650.1)	NA	NA	uniq in slsdg33
Solyc09g073030.3	carbamoyl phosphate synthetase A (AHRD V3.3 --* AT3G27740.2)	NA	NA	uniq in slsdg33
Solyc09g075780.2	Long-chain acyl-CoA synthetase 1 (AHRD V3.3 --* A0A088MTP0_9ERIC)	NA	NA	uniq in slsdg33
Solyc10g045720.1	Syntaxin-like protein (AHRD V3.3 --* D5K191_BAUPU)	NA	NA	uniq in slsdg33
Solyc10g049760.1	Signal anchor, putative (AHRD V3.3 *-* A0A072UJ16_MEDTR)	NA	NA	uniq in slsdg33
Solyc10g076170.1	LOW QUALITY:Protein kinase superfamily protein (AHRD V3.3 --* AT3G53930.5)	NA	NA	uniq in slsdg33
Solyc10g079810.1	LOW QUALITY:mediator of RNA polymerase II transcription subunit (AHRD V3.3 --* AT2G10440.2)	NA	NA	uniq in slsdg33
Solyc10g084095.1	Kinase-like protein (AHRD V3.3 --* A8BLL9_PRUAV)	NA	NA	uniq in slsdg33
Solyc11g005860.2	Cysteine desulfurase (AHRD V3.3 *** A0A0K9Q199_ZOSMR)	NA	NA	uniq in slsdg33
Solyc11g013895.1	F-box protein interaction domain protein (AHRD V3.3 --* A0A072UU57_MEDTR)	NA	NA	uniq in slsdg33
Solyc11g017325.1	Aldolase superfamily protein (AHRD V3.3 --* AT2G26800.5)	NA	NA	uniq in slsdg33
Solyc11g021120.1	NAD(P)H-quinone oxidoreductase subunit 2, chloroplastic (AHRD V3.3 *-* NU2C_BRANA)	NA	NA	uniq in slsdg33
Solyc11g028315.1	DNA topoisomerase 6 subunit B (AHRD V3.3 *-* A0A059D9G5_EUCGR)	NA	NA	uniq in slsdg33
Solyc11g039860.2	LOW QUALITY:Tetratricopeptide repeat (TPR)-like superfamily protein (AHRD V3.3 --* AT1G77360.2)	NA	NA	uniq in slsdg33
Solyc11g039950.2	Ca(2+)-dependent nuclease family protein (AHRD V3.3 --* AT2G40410.2)	NA	NA	uniq in slsdg33
Solyc11g044620.1	LOW QUALITY:NAD(P)H-quinone oxidoreductase subunit 3, chloroplastic (AHRD V3.3 --* NU3C_ADICA)	NA	NA	uniq in slsdg33
Solyc11g065420.2	Transposon protein, putative, Mutator sub-class (AHRD V3.3 --* Q2R0S1_ORYSJ)	NA	NA	uniq in slsdg33
Solyc12g009015.1	Chalcone--flavonone isomerase 3 (AHRD V3.3 --* CFI3_SOYBN)	NA	NA	uniq in slsdg33
Solyc12g010160.1	LOW QUALITY:syntaxin of plants 41 (AHRD V3.3 --* AT5G26980.3)	NA	NA	uniq in slsdg33
Solyc12g010545.1	LOW QUALITY:NAC domain-containing protein 78 (AHRD V3.3 --* M7YSE5_TRIUA)	NA	NA	uniq in slsdg33
Solyc12g014030.1	LOW QUALITY:Glutamate receptor 3.6 (AHRD V3.3 --* W9RW17_9ROSA)	NA	NA	uniq in slsdg33
Solyc12g042110.2	Replication protein A 70 kDa DNA-binding subunit (AHRD V3.3 --* B4FWF2_MAIZE)	NA	NA	uniq in slsdg33
Solyc12g049613.1	Glycosyltransferase (AHRD V3.3 --* M1CLQ4_SOLTU)	NA	NA	uniq in slsdg33
Solyc12g049617.1	Glycosyltransferase (AHRD V3.3 *-* A0A0V0I634_SOLCH)	NA	NA	uniq in slsdg33
Solyc12g062450.2	LOW QUALITY:DNA repair metallo-beta-lactamase family protein (AHRD V3.3 --* AT3G26680.3)	NA	NA	uniq in slsdg33
Solyc12g062810.1	LOW QUALITY:glucose-6-phosphate/phosphate translocator 2 (AHRD V3.3 --* AT1G61800.2)	NA	NA	uniq in slsdg33
Solyc12g088310.2	FAD/NAD(P)-binding oxidoreductase (AHRD V3.3 --* AT1G15140.3)	NA	NA	uniq in slsdg33
Solyc05g010740.1	LOW QUALITY:NAC domain-containing protein (AHRD V3.3 *** I6YR01_9CARY)	AT2G24430	NAC domain containing protein 38	uniq in slsdg33
Solyc08g006025.1	NAC domain-containing protein (AHRD V3.3 *-* I6YR01_9CARY)	AT2G24430	NAC domain containing protein 38	uniq in slsdg33
Solyc09g010160.2	NAC domain protein, (AHRD V3.3 *-* A0A061GU56_THECC)	AT3G44350	NAC domain containing protein 61	uniq in slsdg33
Solyc08g077110.3	NAC domain protein, (AHRD V3.3 *** A0A061GAH7_THECC)	AT5G46590	NAC domain containing protein 96	uniq in slsdg33
Solyc11g071460.2	NAD(P)-binding Rossmann-fold superfamily protein (AHRD V3.3 *** AT2G24190.2)	AT2G24190	NAD(P)-binding Rossmann-fold superfamily protein	uniq in slsdg33
Solyc09g011240.3	aldo-keto reductase 4B-like	AT2G37790	NAD(P)-linked oxidoreductase superfamily protein	uniq in slsdg33
Solyc11g030903.1	NADH-ubiquinone oxidoreductase chain 5 (AHRD V3.3 *-* NU5M_ARATH)	ATMG00665	NADH dehydrogenase 5B	uniq in slsdg33
Solyc01g065770.2	NADH dehydrogenase subunit 7 (AHRD V3.3 *** ATMG00510.1)	ATMG00510	NADH dehydrogenase subunit 7	uniq in slsdg33
Solyc01g065810.2	NADH dehydrogenase subunit 7 (AHRD V3.3 *-* ATMG00510.1)	ATMG00510	NADH dehydrogenase subunit 7	uniq in slsdg33
Solyc04g024570.1	NADH dehydrogenase subunit (AHRD V3.3 *-* Q8HSD5_9SOLN)	ATCG01010	NADH-Ubiquinone oxidoreductase (complex I), chain 5 protein	uniq in slsdg33
Solyc01g035220.1	LOW QUALITY:NAD(P)H-quinone oxidoreductase subunit 2, chloroplastic (AHRD V3.3 *-* NU2C_SILLA)	ATCG01250	NADH-Ubiquinone/plastoquinone (complex I) protein	uniq in slsdg33
Solyc08g077160.2	LOW QUALITY:NAD(P)H-quinone oxidoreductase subunit 2, chloroplastic (AHRD V3.3 *-* NU2C_COECR)	ATCG01250	NADH-Ubiquinone/plastoquinone (complex I) protein	uniq in slsdg33
Solyc06g008450.3	Mi1.6	AT3G46730	NB-ARC domain-containing disease resistance protein	uniq in slsdg33
Solyc08g013970.2	Disease resistance protein (AHRD V3.3 *** W9RZV6_9ROSA)	AT4G27190	NB-ARC domain-containing disease resistance protein	uniq in slsdg33
Solyc11g071420.2	I2C2	AT3G14470	NB-ARC domain-containing disease resistance protein	uniq in slsdg33
Solyc11g061960.2	Kinase family protein (AHRD V3.3 *** D7KZX4_ARALL)	AT3G20860	NIMA-related kinase 5	uniq in slsdg33
Solyc07g056570.1	notabilis	AT3G14440	nine-cis-epoxycarotenoid dioxygenase 3	uniq in slsdg33
Solyc08g016720.1	9-cis-epoxycarotenoid dioxygenase2	AT1G30100	nine-cis-epoxycarotenoid dioxygenase 5	uniq in slsdg33
Solyc06g075500.3	Major facilitator superfamily protein (AHRD V3.3 *** AT3G45710.1)	AT3G45650	nitrate excretion transporter1	uniq in slsdg33
Solyc03g097580.3	Bidirectional sugar transporter SWEET (AHRD V3.3 *** K4BJH5_SOLLC)	AT5G50790	Nodulin MtN3 family protein	uniq in slsdg33
Solyc08g078210.3	Nudix hydrolase (AHRD V3.3 *** A0A061G4C5_THECC)	AT5G47240	nudix hydrolase homolog 8	uniq in slsdg33
Solyc03g034100.3	ovate family protein 6	AT2G18500	ovate family protein 7	uniq in slsdg33
Solyc06g071840.2	Pectate lyase (AHRD V3.3 *-* M1CKT3_SOLTU)	AT3G27400	Pectin lyase-like superfamily protein	uniq in slsdg33
Solyc01g049810.3	Pentatricopeptide repeat-containing protein (AHRD V3.3 *** A0A124SBK7_CYNCS)	AT5G56310	Pentatricopeptide repeat (PPR) superfamily protein	uniq in slsdg33
Solyc04g056420.1	Peroxidase (AHRD V3.3 *** K4CEY0_SOLLC)	AT1G05260	Peroxidase superfamily protein	uniq in slsdg33
Solyc10g086180.2	Phenylalanine ammonia-lyase (AHRD V3.3 *** PAL2_TOBAC)	AT2G37040	PHE ammonia lyase 1	uniq in slsdg33
Solyc08g081390.3	Phosphoglycerate mutase family protein (AHRD V3.3 *** A0A061G5H4_THECC)	AT3G05170	Phosphoglycerate mutase family protein	uniq in slsdg33
Solyc03g058950.3	Inositol hexakisphosphate and diphosphoinositol-pentakisphosphate kinase (AHRD V3.3 *** A0A0B2PX10_GLYSO)	AT5G15070	Phosphoglycerate mutase-like family protein	uniq in slsdg33
Solyc10g076710.2	Phosphoinositide phospholipase C (AHRD V3.3 *** A0A067L8K5_JATCU)	AT3G08510	phospholipase C 2	uniq in slsdg33
Solyc12g039030.1	LOW QUALITY:Photosystem II protein D1 (AHRD V3.3 *-* PSBA_CUSOB)	ATCG00020	photosystem II reaction center protein A	uniq in slsdg33
Solyc02g038710.1	photosystem II reaction center protein I (AHRD V3.3 *** ATCG00080.1)	ATCG00080	photosystem II reaction center protein I	uniq in slsdg33
Solyc02g092620.3	Phototropic-responsive NPH3 family protein (AHRD V3.3 *-* A0A061DGZ5_THECC)	AT5G67385	Phototropic-responsive NPH3 family protein	uniq in slsdg33
Solyc11g040040.2	Phototropic-responsive NPH3 family protein (AHRD V3.3 *** AT3G19850.1)	AT3G19850	Phototropic-responsive NPH3 family protein	uniq in slsdg33
Solyc01g088590.4	invertase/pectin methylesterase inhibitor	AT5G46940	Plant invertase/pectin methylesterase inhibitor superfamily protein	uniq in slsdg33
Solyc12g088830.2	Protein WEAK CHLOROPLAST MOVEMENT UNDER BLUE LIGHT 1 (AHRD V3.3 *** WEB1_ARATH)	AT2G26570	Plant protein of unknown function (DUF827)	uniq in slsdg33
Solyc10g050325.1	Kinesin-like calmodulin-binding protein like (AHRD V3.3 *-* A0A0B2PXL0_GLYSO)	AT1G40087	Plant transposase (Ptta/En/Spm family)	uniq in slsdg33
Solyc05g056500.1	U-box domain-containing protein 25 (AHRD V3.3 *** W9QUC2_9ROSA)	AT3G19380	plant U-box 25	uniq in slsdg33
Solyc02g065800.2	TCP transcription factor 28	AT3G02150	plastid transcription factor 1	uniq in slsdg33
Solyc08g077180.3	Pyruvate kinase (AHRD V3.3 *** K4CN78_SOLLC)	AT1G32440	plastidial pyruvate kinase 3	uniq in slsdg33
Solyc05g055330.3	Drug resistance transporter-like ABC domain protein (AHRD V3.3 *** A0A072VZG4_MEDTR)	AT2G36380	pleiotropic drug resistance 6	uniq in slsdg33
Solyc01g104030.3	Potassium channel (AHRD V3.3 *** Q9SSV3_NICPA)	AT4G22200	potassium transport 2/3	uniq in slsdg33
Solyc02g065520.1	Receptor-like protein kinase (AHRD V3.3 *** W0TR82_ACAMN)	AT2G33580	Protein kinase superfamily protein	uniq in slsdg33
Solyc09g091580.3	ABC1 protein kinase 6 (AHRD V3.3 *** Q9LRN0_ARATH)	AT3G24190	Protein kinase superfamily protein	uniq in slsdg33
Solyc10g076760.2	Kinase family protein (AHRD V3.3 *** B9IG83_POPTR)	AT3G09010	Protein kinase superfamily protein	uniq in slsdg33
Solyc03g065205.1	DUF1336 family protein, putative (DUF1336) (AHRD V3.3 *** AT5G39430.1)	AT5G39430	Protein of unknown function (DUF1336)	uniq in slsdg33
Solyc01g099980.3	enolase (DUF1399) (AHRD V3.3 *** AT1G56230.1)	AT1G56230	Protein of unknown function (DUF1399)	uniq in slsdg33
Solyc04g008360.3	Protein OBERON 3 (AHRD V3.3 *-* A0A0B2R231_GLYSO)	AT1G14740	Protein of unknown function (DUF1423)	uniq in slsdg33
Solyc03g119470.2	DUF1666 family protein (AHRD V3.3 *** G7KN40_MEDTR)	AT1G73850	Protein of unknown function (DUF1666)	uniq in slsdg33
Solyc08g066460.2	DUF1677 family protein (AHRD V3.3 *** G7J3I0_MEDTR)	AT2G25780	Protein of unknown function (DUF1677)	uniq in slsdg33
Solyc01g009260.1	LOW QUALITY:ribosomal protein L5 (AHRD V3.3 *-* ATMG00210.1)	AT5G22090	Protein of unknown function (DUF3049)	uniq in slsdg33
Solyc08g080770.3	LURP-one-like protein (AHRD V3.3 *** AT1G53875.1)	AT3G14260	Protein of unknown function (DUF567)	uniq in slsdg33
Solyc05g051860.3	senescence-associated family protein, putative (DUF581) (AHRD V3.3 *** AT1G78020.1)	AT4G39795	Protein of unknown function (DUF581)	uniq in slsdg33
Solyc02g085490.2	DUF620 family protein (AHRD V3.3 *** G7ZW25_MEDTR)	AT5G66740	Protein of unknown function (DUF620)	uniq in slsdg33
Solyc12g014260.1	LIGHT-DEPENDENT SHORT HYPOCOTYLS-like protein (DUF640) (AHRD V3.3 *** AT2G42610.2)	AT2G42610	Protein of unknown function (DUF640)	uniq in slsdg33
Solyc12g098450.2	magnesium transporter NIPA (DUF803) (AHRD V3.3 *** AT4G13800.8)	AT1G34470	Protein of unknown function (DUF803)	uniq in slsdg33
Solyc11g069840.2	electron transporter, putative (Protein of unknown function, DUF547) (AHRD V3.3 *** AT5G60720.1)	AT5G60720	Protein of unknown function, DUF547	uniq in slsdg33
Solyc07g024020.2	Protein phosphatase 2C family protein (AHRD V3.3 *** AT1G47380.1)	AT1G47380	Protein phosphatase 2C family protein	uniq in slsdg33
Solyc04g077330.3	Serine/threonine-protein kinase (AHRD V3.3 *-* M1A1I5_SOLTU)	AT1G11300	protein serine/threonine kinases;protein kinases;ATP binding;sugar binding;kinases;carbohydrate binding	uniq in slsdg33
Solyc07g063735.1	Serine/threonine-protein kinase (AHRD V3.3 *-* M1BNV7_SOLTU)	AT1G11300	protein serine/threonine kinases;protein kinases;ATP binding;sugar binding;kinases;carbohydrate binding	uniq in slsdg33
Solyc01g049685.1	Transcription factor Pur-alpha 1 (AHRD V3.3 *-* PUR_ARATH)	AT2G32080	purin-rich alpha 1	uniq in slsdg33
Solyc12g087880.2	Purine permease-like protein (AHRD V3.3 *-* G7J4H5_MEDTR)	AT1G28230	purine permease 1	uniq in slsdg33
Solyc02g087440.3	DUF248-1 (AHRD V3.3 --* A0A161CGG5_POPTO)	AT3G28420	Putative membrane lipoprotein	uniq in slsdg33
Solyc03g078570.3	Ras-related protein (AHRD V3.3 *** W9QNC0_9ROSA)	AT5G10260	RAB GTPase homolog H1E	uniq in slsdg33
Solyc01g099500.1	RecQ family ATP-dependent DNA helicase (AHRD V3.3 *-* A0A072VML8_MEDTR)	AT5G27680	RECQ helicase SIM	uniq in slsdg33
Solyc01g091760.2	Ethylene-responsive transcription factor (AHRD V3.3 *** W9R099_9ROSA)	AT5G19790	related to AP2 11	uniq in slsdg33
Solyc08g081690.3	NADPH oxidase	AT1G64060	respiratory burst oxidase protein F	uniq in slsdg33
Solyc07g005470.3	Reticulon-like protein (AHRD V3.3 *** K4CB19_SOLLC)	AT5G58000	Reticulon family protein	uniq in slsdg33
Solyc10g006910.2	50S ribosomal protein L16, chloroplastic (AHRD V3.3 *** RK16_SOLBU)	ATCG00790	ribosomal protein L16	uniq in slsdg33
Solyc01g017083.1	50S ribosomal protein L20, chloroplastic (AHRD V3.3 *** RK20_PANGI)	ATCG00660	ribosomal protein L20	uniq in slsdg33
Solyc03g013605.1	30S ribosomal protein S18, chloroplastic (AHRD V3.3 *-* RR18_TOBAC)	ATCG00650	ribosomal protein S18	uniq in slsdg33
Solyc12g062640.1	30S ribosomal protein S2, chloroplastic (AHRD V3.3 *-* RR2_NICTO)	ATCG00160	ribosomal protein S2	uniq in slsdg33
Solyc02g067260.2	RING/U-box superfamily protein (AHRD V3.3 *-* AT1G26800.1)	AT1G26800	RING/U-box superfamily protein	uniq in slsdg33
Solyc02g083527.1	LOW QUALITY:RING/U-box superfamily protein (AHRD V3.3 *** AT3G51325.1)	AT3G51325	RING/U-box superfamily protein	uniq in slsdg33
Solyc04g014220.1	LOW QUALITY:RING/U-box superfamily protein, putative (AHRD V3.3 *** A0A061E293_THECC)	AT1G72220	RING/U-box superfamily protein	uniq in slsdg33
Solyc11g005320.1	RING/U-box superfamily protein (AHRD V3.3 *** AT1G49230.1)	AT1G49230	RING/U-box superfamily protein	uniq in slsdg33
Solyc12g014590.2	Pirin-like protein family (AHRD V3.3 *** A0A151SXI4_CAJCA)	AT1G50590	RmlC-like cupins superfamily protein	uniq in slsdg33
Solyc02g067590.1	LOW QUALITY:DNA-directed RNA polymerase subunit beta (AHRD V3.3 *-* RPOB_NANDO)	ATCG00190	RNA polymerase subunit beta	uniq in slsdg33
Solyc10g049590.1	LOW QUALITY:DNA-directed RNA polymerase subunit beta (AHRD V3.3 *-* RPOB_NYMAL)	ATCG00190	RNA polymerase subunit beta	uniq in slsdg33
Solyc12g035930.1	DNA-directed RNA polymerase subunit beta (AHRD V3.3 *-* RPOB_SOLLC)	ATCG00190	RNA polymerase subunit beta	uniq in slsdg33
Solyc01g014320.3	S-adenosyl-L-methionine-dependent methyltransferases superfamily protein, putative (AHRD V3.3 *** A0A061E9R4_THECC)	AT5G38100	S-adenosyl-L-methionine-dependent methyltransferases superfamily protein	uniq in slsdg33
Solyc07g053120.3	Serine/threonine-protein kinase (AHRD V3.3 *-* K4CFL1_SOLLC)	AT4G03230	S-locus lectin protein kinase family protein	uniq in slsdg33
Solyc08g007435.1	Auxin responsive SAUR protein (AHRD V3.3 *** A0A103XGA7_CYNCS)	AT3G60690	SAUR-like auxin-responsive protein family	uniq in slsdg33
Solyc11g069095.1	SAUR-like auxin-responsive protein family, putative (AHRD V3.3 *** A0A061GX66_THECC)	AT2G28085	SAUR-like auxin-responsive protein family	uniq in slsdg33
Solyc04g080290.3	Sec14p-like phosphatidylinositol transfer family protein (AHRD V3.3 *** AT1G75170.2)	AT1G75170	Sec14p-like phosphatidylinositol transfer family protein	uniq in slsdg33
Solyc06g010005.1	MLO-like protein (AHRD V3.3 *-* K4C428_SOLLC)	AT4G24250	Seven transmembrane MLO family protein	uniq in slsdg33
Solyc06g010010.2	MLO-like protein (AHRD V3.3 *-* K4C428_SOLLC)	AT3G45290	Seven transmembrane MLO family protein	uniq in slsdg33
Solyc06g010030.3	MLO-like protein (AHRD V3.3 *-* K4C430_SOLLC)	AT1G11310	Seven transmembrane MLO family protein	uniq in slsdg33
Solyc05g021550.2	Sister-chromatide cohesion protein 3 (AHRD V3.3 *-* D7M8Q0_ARALL)	AT2G47980	sister-chromatid cohesion protein 3	uniq in slsdg33
Solyc07g061800.3	SOUL heme-binding family protein (AHRD V3.3 *** AT1G17100.1)	AT1G17100	SOUL heme-binding family protein	uniq in slsdg33
Solyc02g077920.3	Colorless non-ripening	AT2G33810	squamosa promoter binding protein-like 3	uniq in slsdg33
Solyc10g086600.2	Subtilisin-like protease (AHRD V3.3 *-* W9RLB7_9ROSA)	AT5G45650	subtilase family protein	uniq in slsdg33
Solyc11g045110.2	Sucrose-phosphate synthase family protein (AHRD V3.3 *** AT4G10120.3)	AT4G10120	Sucrose-phosphate synthase family protein	uniq in slsdg33
Solyc09g082550.3	Sulfate transporter (AHRD V3.3 *** D7LTZ8_ARALL)	AT3G51895	sulfate transporter 3;1	uniq in slsdg33
Solyc01g086950.3	SWIB/MDM2 and Plus-3 and GYF domain-containing protein (AHRD V3.3 *** AT5G08430.2)	AT5G08430	SWIB/MDM2 domain;Plus-3;GYF	uniq in slsdg33
Solyc01g086957.1	GYF domain protein (AHRD V3.3 *-* A0A072UAG4_MEDTR)	AT5G08430	SWIB/MDM2 domain;Plus-3;GYF	uniq in slsdg33
Solyc01g103310.3	Binding protein, putative isoform 3 (AHRD V3.3 *-* A0A061DJC6_THECC)	AT5G08430	SWIB/MDM2 domain;Plus-3;GYF	uniq in slsdg33
Solyc01g103340.3	Zinc finger CCCH domain-containing protein 44 (AHRD V3.3 *-* W9SKR1_9ROSA)	AT5G08430	SWIB/MDM2 domain;Plus-3;GYF	uniq in slsdg33
Solyc05g021580.3	Serine/threonine-protein kinase TOR (AHRD V3.3 *-* TOR_ARATH)	AT1G50030	target of rapamycin	uniq in slsdg33
Solyc03g119770.3	branched1a	AT1G68800	TCP domain protein 12	uniq in slsdg33
Solyc10g005410.3	Terpene synthase (AHRD V3.3 *** G5CV41_SOLLC)	AT1G61680	terpene synthase 14	uniq in slsdg33
Solyc01g101170.3	Viridiflorene synthase (AHRD V3.3 *** TPS31_SOLLC)	AT5G23960	terpene synthase 21	uniq in slsdg33
Solyc06g059930.3	sesquiterpene synthase 1	AT5G23960	terpene synthase 21	uniq in slsdg33
Solyc12g006570.2	Sesquiterpene synthase (AHRD V3.3 *** G5CV52_SOLLC)	AT5G23960	terpene synthase 21	uniq in slsdg33
Solyc01g108043.1	Pentatricopeptide repeat-containing protein (AHRD V3.3 *-* A0A103XM66_CYNCS)	AT5G39710	Tetratricopeptide repeat (TPR)-like superfamily protein	uniq in slsdg33
Solyc04g082980.2	Tetratricopeptide repeat-containing protein (AHRD V3.3 *** D7KTV6_ARALL)	AT1G76630	Tetratricopeptide repeat (TPR)-like superfamily protein	uniq in slsdg33
Solyc07g008210.3	Tetratricopeptide repeat (TPR)-like superfamily protein (AHRD V3.3 *-* AT1G80130.1)	AT1G80130	Tetratricopeptide repeat (TPR)-like superfamily protein	uniq in slsdg33
Solyc09g015320.2	Photosystem I assembly protein Ycf3 (AHRD V3.3 *** YCF3_SOLLC)	ATCG00360	Tetratricopeptide repeat (TPR)-like superfamily protein	uniq in slsdg33
Solyc09g015340.2	Photosystem I assembly protein Ycf3 (AHRD V3.3 *** YCF3_SOLLC)	ATCG00360	Tetratricopeptide repeat (TPR)-like superfamily protein	uniq in slsdg33
Solyc11g028310.2	DNA topoisomerase 6 subunit B (AHRD V3.3 *-* A0A0V0IMM5_SOLCH)	AT3G20780	topoisomerase 6 subunit B	uniq in slsdg33
Solyc08g006230.3	Transcriptional factor B3 family protein (AHRD V3.3 *-* AT4G00260.1)	AT4G00260	Transcriptional factor B3 family protein	uniq in slsdg33
Solyc11g011980.3	Transducin/WD40 repeat-like superfamily protein (AHRD V3.3 *** AT2G32950.1)	AT2G32950	Transducin/WD40 repeat-like superfamily protein	uniq in slsdg33
Solyc05g019980.2	trichome birefringence-like protein (DUF828) (AHRD V3.3 *-* AT3G06080.2)	AT5G19160	TRICHOME BIREFRINGENCE-LIKE 11	uniq in slsdg33
Solyc08g076025.1	Tudor/PWWP/MBT superfamily protein (AHRD V3.3 *** G7K6J4_MEDTR)	AT3G03140	Tudor/PWWP/MBT superfamily protein	uniq in slsdg33
Solyc11g010700.2	Kinase family protein (AHRD V3.3 *** D7MTZ0_ARALL)	AT5G65500	U-box domain-containing protein kinase family protein	uniq in slsdg33
Solyc10g083470.2	E3 ubiquitin-protein ligase-like protein (AHRD V3.3 *** A0A1B1LUK2_VITPS)	AT4G12570	ubiquitin protein ligase 5	uniq in slsdg33
Solyc05g053120.1	Glycosyltransferase (AHRD V3.3 *** A0A0A1WC49_NICAT)	AT3G50740	UDP-glucosyl transferase 72E1	uniq in slsdg33
Solyc04g016220.3	Glycosyltransferase (AHRD V3.3 *** M1CLQ4_SOLTU)	AT4G34131	UDP-glucosyl transferase 73B3	uniq in slsdg33
Solyc03g078800.2	Glycosyltransferase (AHRD V3.3 *** K4BHV3_SOLLC)	AT1G22400	UDP-Glycosyltransferase superfamily protein	uniq in slsdg33
Solyc05g055343.1	Glycosyltransferase (AHRD V3.3 *** K4CEK8_SOLLC)	AT5G49690	UDP-Glycosyltransferase superfamily protein	uniq in slsdg33
Solyc10g086240.2	Glycosyltransferase (AHRD V3.3 *** V4SWV8_9ROSI)	AT2G36970	UDP-Glycosyltransferase superfamily protein	uniq in slsdg33
Solyc12g042600.2	Glycosyltransferase (AHRD V3.3 *** K4DF51_SOLLC)	AT2G36770	UDP-Glycosyltransferase superfamily protein	uniq in slsdg33
Solyc11g018660.2	NAC domain-containing protein, putative (AHRD V3.3 *** B9SLE9_RICCO)	AT1G71930	vascular related NAC-domain protein 7	uniq in slsdg33
Solyc07g007020.3	Kinase family protein (AHRD V3.3 *** B9GLQ0_POPTR)	AT1G21270	wall-associated kinase 2	uniq in slsdg33
Solyc11g044632.1	Ycf1 protein (AHRD V3.3 *-* ATCG01130.1)	ATCG01000	Ycf1 protein	uniq in slsdg33
Solyc12g088330.1	LOW QUALITY:ZCF37, putative (AHRD V3.3 *** A0A061F7D6_THECC)	AT1G59590	ZCF37	uniq in slsdg33

## Sheet: TableS2
Supplemental table 2. Genes differentially expressed in slsdg34 vs WT in shoots.
A. Up-regulated genes in slsdg34 vs WT
Gene ID	ITAG3.2 annotation	Arabidopsis homolog	TAIR10 annotation	shared with slsdg33
Solyc01g009430.3	BnaA07g13420D protein (AHRD V3.3 *** A0A078ETL1_BRANA)	AT2G27830	NA	shared
Solyc01g079830.3	Fatty acid hydroxylase superfamily (AHRD V3.3 --* AT1G02205.1)	AT5G19190	NA	shared
Solyc01g106910.3	At4g33800-like protein (AHRD V3.3 *** A0A068F5X7_BRANA)	AT4G33800	NA	shared
Solyc01g107090.2	LOW QUALITY:beta-1,4-xylosidase (AHRD V3.3 *** AT3G19615.1)	AT3G19615	NA	shared
Solyc01g107100.3	LOW QUALITY:beta-1,4-xylosidase (AHRD V3.3 *** AT3G19615.1)	AT3G19615	NA	shared
Solyc02g078660.3	Hydroxyproline-rich glycoprotein family protein (AHRD V3.3 *-* AT1G61080.6)	AT4G04980	NA	shared
Solyc03g096180.3	ATP binding protein, putative (AHRD V3.3 *-* B9SLM8_RICCO)	AT2G40070	NA	shared
Solyc03g114430.1	LOW QUALITY:Transmembrane protein, putative (AHRD V3.3 *** A0A072VIN4_MEDTR)	AT1G74055	NA	shared
Solyc03g116630.3	cytochrome P450 family protein (AHRD V3.3 *** AT1G52565.1)	AT1G52565	NA	shared
Solyc03g117675.1	ATP-dependent DNA helicase (AHRD V3.3 *** AT2G24100.1)	AT2G24100	NA	shared
Solyc04g054340.1	LOW QUALITY:transmembrane protein (AHRD V3.3 --* AT5G65440.9)	AT5G65207	NA	shared
Solyc05g012850.2	transmembrane protein (AHRD V3.3 *** AT3G11810.1)	AT3G11810	NA	shared
Solyc05g015710.3	transmembrane protein (AHRD V3.3 *** AT1G27290.2)	AT1G27290	NA	shared
Solyc05g016060.3	cysteine-rich/transmembrane domain A-like protein (AHRD V3.3 *** AT2G32190.1)	AT2G32190	NA	shared
Solyc05g025900.3	Damaged dna-binding 2, putative isoform 1 (AHRD V3.3 *** A0A061GKJ3_THECC)	AT3G43850	NA	shared
Solyc05g053180.3	ABC-2 and Plant PDR ABC-type transporter family protein (AHRD V3.3 --* AT4G15233.6)	AT3G17580	NA	shared
Solyc06g068660.3	F-box/RNI superfamily protein (AHRD V3.3 *** AT1G73120.1)	AT1G73120	NA	shared
Solyc06g069640.3	dCTP pyrophosphatase 1 (AHRD V3.3 *** A0A151SL49_CAJCA)	AT3G25400	NA	shared
Solyc07g008930.1	LOW QUALITY:DUF4228 domain protein (AHRD V3.3 *** G7JUB6_MEDTR)	AT1G06980	NA	shared
Solyc07g041830.3	Damaged dna-binding 2, putative isoform 1 (AHRD V3.3 *** A0A061GM96_THECC)	AT5G21940	NA	shared
Solyc08g076520.3	Transmembrane protein, putative (AHRD V3.3 *** G7KCF0_MEDTR)	AT2G35470	NA	shared
Solyc09g011470.3	Plant/T7H20-70 protein (AHRD V3.3 *** G7L5L0_MEDTR)	AT5G02020	NA	shared
Solyc10g086570.3	Chaperone DnaJ (AHRD V3.3 *** A0A0B0NPS3_GOSAR)	AT5G02160	NA	shared
Solyc11g010625.1	Ribosomal RNA small subunit methyltransferase A (AHRD V3.3 *** A0A0B0NTG7_GOSAR)	AT4G38060	NA	shared
Solyc11g013330.2	BPS1-like protein (AHRD V3.3 *** AT1G22030.1)	AT1G22030	NA	shared
Solyc12g010420.1	LOW QUALITY:NHL domain protein (AHRD V3.3 --* AT5G14895.1)	AT5G11070	NA	shared
Solyc02g071475.1	2-oxoglutarate (2OG) and Fe(II)-dependent oxygenase superfamily protein (AHRD V3.3 *** AT4G25300.1)	AT4G25300	2-oxoglutarate (2OG) and Fe(II)-dependent oxygenase superfamily protein	shared
Solyc06g068270.3	2-oxoglutarate (2OG) and Fe(II)-dependent oxygenase superfamily protein (AHRD V3.3 *** AT1G49390.1)	AT1G49390	2-oxoglutarate (2OG) and Fe(II)-dependent oxygenase superfamily protein	shared
Solyc07g054920.2	2-oxoglutarate (2OG) and Fe(II)-dependent oxygenase superfamily protein (AHRD V3.3 *** AT2G44800.1)	AT2G44800	2-oxoglutarate (2OG) and Fe(II)-dependent oxygenase superfamily protein	shared
Solyc09g008560.3	2-oxoglutarate (2OG) and Fe(II)-dependent oxygenase superfamily protein (AHRD V3.3 *** AT2G36690.2)	AT2G36690	2-oxoglutarate (2OG) and Fe(II)-dependent oxygenase superfamily protein	shared
Solyc09g089780.3	2-oxoglutarate (2OG) and Fe(II)-dependent oxygenase superfamily protein (AHRD V3.3 *** AT1G06620.1)	AT1G06620	2-oxoglutarate (2OG) and Fe(II)-dependent oxygenase superfamily protein	shared
Solyc06g053670.1	Enoyl-CoA hydratase/isomerase family protein (AHRD V3.3 *** D7MH17_ARALL)	AT4G14440	3-hydroxyacyl-CoA dehydratase 1	shared
Solyc09g065780.3	3-ketoacyl-CoA synthase (AHRD V3.3 *** K4CUK4_SOLLC)	AT2G26640	3-ketoacyl-CoA synthase 11	shared
Solyc11g072980.1	3-ketoacyl-CoA synthase (AHRD V3.3 *** K4DB04_SOLLC)	AT1G07720	3-ketoacyl-CoA synthase 3	shared
Solyc12g099970.2	SNF1 kinase complex anchoring protein	AT5G21170	5'-AMP-activated protein kinase beta-2 subunit protein	shared
Solyc05g012110.3	6-phosphogluconolactonase, putative (AHRD V3.3 *** B9REC3_RICCO)	AT1G13700	6-phosphogluconolactonase 1	shared
Solyc02g030655.1	Ninja-family protein (AHRD V3.3 *-* A0A1D1YDC3_9ARAE)	AT3G29575	ABI five binding protein 3	shared
Solyc03g034240.3	Abscisic acid-deficient 4 (AHRD V3.3 *** A0A061EPF5_THECC)	AT1G67080	abscisic acid (aba)-deficient 4	shared
Solyc07g026650.3	1-aminocyclopropane-1-carboxylate oxidase 5	AT2G19590	ACC oxidase 1	shared
Solyc08g068700.1	Tyramine n-hydroxycinnamoyl transferase (AHRD V3.3 *** Q5D8C0_CAPAN)	AT2G39030	Acyl-CoA N-acyltransferases (NAT) superfamily protein	shared
Solyc08g068710.1	Tyramine n-hydroxycinnamoyl transferase (AHRD V3.3 *** Q5D8C0_CAPAN)	AT2G39030	Acyl-CoA N-acyltransferases (NAT) superfamily protein	shared
Solyc08g068730.1	Tyramine n-hydroxycinnamoyl transferase (AHRD V3.3 *** Q5D8C0_CAPAN)	AT2G39030	Acyl-CoA N-acyltransferases (NAT) superfamily protein	shared
Solyc08g068770.2	N-hydroxycinnamoyl-CoA:tyramine N-hydroxycinnamoyl transferase	AT2G39030	Acyl-CoA N-acyltransferases (NAT) superfamily protein	shared
Solyc08g068790.2	Tyramine n-hydroxycinnamoyl transferase (AHRD V3.3 *** Q5D8C0_CAPAN)	AT2G39030	Acyl-CoA N-acyltransferases (NAT) superfamily protein	shared
Solyc12g099940.2	Acyl-CoA N-acyltransferase (AHRD V3.3 *** A0A103YFJ4_CYNCS)	AT2G06025	Acyl-CoA N-acyltransferases (NAT) superfamily protein	shared
Solyc01g087070.3	ADP,ATP carrier protein, mitochondrial (AHRD V3.3 *** ADT1_SOLTU)	AT5G13490	ADP/ATP carrier 2	shared
Solyc01g109140.3	divinyl ether synthase	AT5G42650	allene oxide synthase	shared
Solyc03g116247.1	Alpha 1,4-glycosyltransferase family protein (AHRD V3.3 *-* Q2MGS1_MEDTR)	AT4G19900	alpha 1,4-glycosyltransferase family protein	shared
Solyc01g109720.3	alpha/beta-Hydrolases superfamily protein (AHRD V3.3 *** AT2G18360.1)	AT2G18360	alpha/beta-Hydrolases superfamily protein	shared
Solyc02g077430.3	Phospholipase A1 (AHRD V3.3 *** A5YW95_CAPAN)	AT4G18550	alpha/beta-Hydrolases superfamily protein	shared
Solyc04g077860.3	Sigma factor sigb regulation protein rsbq, putative (AHRD V3.3 *** B9R708_RICCO)	AT3G03990	alpha/beta-Hydrolases superfamily protein	shared
Solyc02g078380.3	Stem-specific protein TSJT1 (AHRD V3.3 *** A0A151T7D1_CAJCA)	AT4G27450	Aluminium induced protein with YGL and LRDR motifs	shared
Solyc02g078500.2	Stem-specific protein TSJT1, putative (AHRD V3.3 *** B9RZ68_RICCO)	AT4G27450	Aluminium induced protein with YGL and LRDR motifs	shared
Solyc03g006490.3	glutaminase domain-containing protein	AT4G27450	Aluminium induced protein with YGL and LRDR motifs	shared
Solyc12g013700.2	Stem-specific protein tsjt1, putative (AHRD V3.3 *** D6BRF0_JATCU)	AT4G27450	Aluminium induced protein with YGL and LRDR motifs	shared
Solyc09g074280.1	LOW QUALITY:Ankyrin repeat-containing protein (AHRD V3.3 *** A0A118K274_CYNCS)	AT1G07710	Ankyrin repeat family protein	shared
Solyc05g009790.1	AP2/B3 transcription factor family protein (AHRD V3.3 *** AT1G25560.1)	AT1G25560	AP2/B3 transcription factor family protein	shared
Solyc06g068570.3	AP2-like ethylene-responsive transcription factor	AT1G16060	ARIA-interacting double AP2 domain protein	shared
Solyc04g077850.3	U-box domain-containing protein (AHRD V3.3 *** A0A0K9PK99_ZOSMR)	AT3G01400	ARM repeat superfamily protein	shared
Solyc05g006550.3	Microtubule-associated protein TORTIFOLIA1, putative (AHRD V3.3 *** B9S2H6_RICCO)	AT1G27210	ARM repeat superfamily protein	shared
Solyc02g065150.2	LOB domain-containing 36-like protein (AHRD V3.3 *** A0A0B0PS92_GOSAR)	AT5G66870	ASYMMETRIC LEAVES 2-like 1	shared
Solyc05g053000.1	AT hook motif DNA-binding family protein (AHRD V3.3 *** A0A072V017_MEDTR)	AT3G55560	AT-hook protein of GA feedback 2	shared
Solyc06g070960.2	ABC transporter family protein (AHRD V3.3 *** A0A097P9Q6_HEVBR)	AT3G47730	ATP-binding cassette A2	shared
Solyc01g108790.2	3-hydroxyisobutyryl-CoA hydrolase-like protein (AHRD V3.3 *-* A0A072TX02_MEDTR)	AT2G30650	ATP-dependent caseinolytic (Clp) protease/crotonase family protein	shared
Solyc03g115870.3	Thioredoxin (AHRD V3.3 *** A0A072UTZ5_MEDTR)	AT5G61440	atypical CYS HIS rich thioredoxin 5	shared
Solyc07g016180.3	Auxin Response Factor 7A	AT1G19220	auxin response factor 19	shared
Solyc12g096570.1	ARGOS (AHRD V3.3 *** C7SFP7_SOLLC)	AT3G59900	auxin-regulated gene involved in organ size	shared
Solyc01g107400.2	IAA-amido synthetase	AT2G14960	Auxin-responsive GH3 family protein	shared
Solyc02g064830.3	Indole-3-acetic acid-amido synthetas 3-3	AT2G14960	Auxin-responsive GH3 family protein	shared
Solyc08g068480.1	Indole-3-acetic acid-amido synthetase GH3.5 (AHRD V3.3 *-* A0A061E4T5_THECC)	AT4G03400	Auxin-responsive GH3 family protein	shared
Solyc08g068490.3	Auxin-responsive GH3 family protein (AHRD V3.3 *** AT4G03400.2)	AT4G03400	Auxin-responsive GH3 family protein	shared
Solyc12g005310.2	Auxin-responsive GH3 family protein (AHRD V3.3 *** AT5G54510.1)	AT5G54510	Auxin-responsive GH3 family protein	shared
Solyc10g055820.2	Chitinase (AHRD V3.3 *** B9VRK7_CAPAN)	AT3G12500	basic chitinase	shared
Solyc04g005660.3	Transcription factor protein (AHRD V3.3 *** A0A0B0MSC8_GOSAR)	AT3G28857	basic helix-loop-helix (bHLH) DNA-binding family protein	shared
Solyc03g121240.1	basic helix-loop-helix (bHLH) DNA-binding superfamily protein (AHRD V3.3 *** AT3G21330.1)	AT3G21330	basic helix-loop-helix (bHLH) DNA-binding superfamily protein	shared
Solyc04g078790.3	basic helix-loop-helix (bHLH) DNA-binding superfamily protein (AHRD V3.3 *** AT3G50330.1)	AT3G50330	basic helix-loop-helix (bHLH) DNA-binding superfamily protein	shared
Solyc03g043900.1	Basic-leucine zipper (BZIP) transcription factor family (AHRD V3.3 *-* A0A0K9NZH2_ZOSMR)	AT3G49760	basic leucine-zipper 5	shared
Solyc00g174330.3	Pathogenesis-related protein 1 (AHRD V3.3 *-* Q75QH2_CAPCH)	AT2G14580	basic pathogenesis-related protein 1	shared
Solyc07g042510.3	Bax inhibitor-1 family protein (AHRD V3.3 *** AT4G15470.1)	AT4G15470	Bax inhibitor-1 family protein	shared
Solyc08g044510.3	Beta-glucosidase (AHRD V3.3 *** L0ASF2_POPTO)	AT2G44480	beta glucosidase 17	shared
Solyc04g016470.3	LEQA L.esculentum TomQ'a beta(1,3)glucanase	AT3G57270	beta-1,3-glucanase 1	shared
Solyc01g104950.3	LEXYL2	AT5G64570	beta-D-xylosidase 4	shared
Solyc12g008840.2	beta-galactosidase 4	AT4G26140	beta-galactosidase 12	shared
Solyc01g110000.3	Beta-galactosidase (AHRD V3.3 *** A0A0V0ITW0_SOLCH)	AT4G36360	beta-galactosidase 3	shared
Solyc11g044910.2	Beta-D-xylosidase family protein (AHRD V3.3 *** B9HWX2_POPTR)	AT5G49360	beta-xylosidase 1	shared
Solyc08g007460.2	Lipid transfer protein (AHRD V3.3 *** I3SGW1_MEDTR)	AT1G62790	Bifunctional inhibitor/lipid-transfer protein/seed storage 2S albumin superfamily protein	shared
Solyc08g078870.2	14 kDa proline-rich protein DC2.15, putative (AHRD V3.3 *** B9RD76_RICCO)	AT4G12510	Bifunctional inhibitor/lipid-transfer protein/seed storage 2S albumin superfamily protein	shared
Solyc08g078890.2	Bifunctional inhibitor/lipid-transfer protein/seed storage 2S albumin superfamily protein (AHRD V3.3 *-* AT1G62500.1)	AT1G62500	Bifunctional inhibitor/lipid-transfer protein/seed storage 2S albumin superfamily protein	shared
Solyc08g079190.1	Bifunctional inhibitor/lipid-transfer protein/seed storage 2S albumin superfamily protein (AHRD V3.3 *** AT4G12490.1)	AT4G12490	Bifunctional inhibitor/lipid-transfer protein/seed storage 2S albumin superfamily protein	shared
Solyc08g079230.1	Bifunctional inhibitor/lipid-transfer protein/seed storage 2S albumin superfamily protein (AHRD V3.3 *** A0A061DW53_THECC)	AT4G12490	Bifunctional inhibitor/lipid-transfer protein/seed storage 2S albumin superfamily protein	shared
Solyc09g082270.3	Lipid transfer protein (AHRD V3.3 *** G7K520_MEDTR)	AT3G22600	Bifunctional inhibitor/lipid-transfer protein/seed storage 2S albumin superfamily protein	shared
Solyc01g109600.3	BTB/POZ domain-containing protein (AHRD V3.3 *** A0A1D1XPT6_9ARAE)	AT3G05675	BTB/POZ domain-containing protein	shared
Solyc04g082420.3	BTB/POZ domain-containing protein (AHRD V3.3 *** AT2G30600.6)	AT2G30600	BTB/POZ domain-containing protein	shared
Solyc06g053720.2	Zinc finger, C2H2 (AHRD V3.3 *** A0A124SAQ3_CYNCS)	AT3G23130	C2H2 and C2HC zinc fingers superfamily protein	shared
Solyc06g061160.1	LOW QUALITY:Zinc finger, C2H2 (AHRD V3.3 *** A0A103XFH7_CYNCS)	AT4G17810	C2H2 and C2HC zinc fingers superfamily protein	shared
Solyc02g085580.3	Zinc finger protein (AHRD V3.3 *** K9P0T0_9ROSI)	AT5G66730	C2H2-like zinc finger protein	shared
Solyc05g054650.1	Zinc finger family protein (AHRD V3.3 *** B9HM54_POPTR)	AT2G28710	C2H2-type zinc finger family protein	shared
Solyc06g005180.1	LOW QUALITY:Zinc finger family protein (AHRD V3.3 *** B9GPB9_POPTR)	AT1G02040	C2H2-type zinc finger family protein	shared
Solyc06g074800.1	LOW QUALITY:Zinc finger family protein (AHRD V3.3 *** B9HQP7_POPTR)	AT2G28200	C2H2-type zinc finger family protein	shared
Solyc07g006370.1	Cation calcium exchanger (AHRD V3.3 *** A0A072U799_MEDTR)	AT5G17860	calcium exchanger 7	shared
Solyc01g010020.3	Calmodulin, putative (AHRD V3.3 *** B9RLA1_RICCO)	AT3G25600	Calcium-binding EF-hand family protein	shared
Solyc06g068940.3	Calcium-dependent lipid-binding (CaLB domain) family protein (AHRD V3.3 *** AT3G17980.1)	AT3G17980	Calcium-dependent lipid-binding (CaLB domain) family protein	shared
Solyc09g007010.1	Pathogenesis-related protein 1 (AHRD V3.3 *** Q75QH2_CAPCH)	AT4G33720	CAP (Cysteine-rich secretory proteins, Antigen 5, and Pathogenesis-related 1 protein) superfamily protein	shared
Solyc07g047940.3	Zinc finger transcription factor 49	AT2G05160	CCCH-type zinc fingerfamily protein with RNA-binding domain	shared
Solyc09g092110.3	Light-regulated (AHRD V3.3 *** A0A0B0P5I2_GOSAR)	AT3G26740	CCR-like	shared
Solyc02g083835.1	Chaperone DnaJ-like protein (AHRD V3.3 *** A0A1C6ZYA6_MEDSA)	AT4G36040	Chaperone DnaJ-domain superfamily protein	shared
Solyc03g117590.3	Heat shock protein binding protein (AHRD V3.3 *** E2DDU6_SOLLC)	AT1G80920	Chaperone DnaJ-domain superfamily protein	shared
Solyc04g081530.1	DNAJ-like protein (AHRD V3.3 *** A2TJX6_SOLLC)	AT4G36040	Chaperone DnaJ-domain superfamily protein	shared
Solyc06g068500.3	Chaperone DnaJ domain protein (AHRD V3.3 *** B7FGF7_MEDTR)	AT1G80920	Chaperone DnaJ-domain superfamily protein	shared
Solyc07g065970.1	Chaperone protein DNAj, putative (AHRD V3.3 *** B9SXA3_RICCO)	AT3G13310	Chaperone DnaJ-domain superfamily protein	shared
Solyc02g094060.3	Chloride channel protein (AHRD V3.3 *** Q9XF71_TOBAC)	AT5G40890	chloride channel A	shared
Solyc02g070990.1	Chlorophyll a-b binding protein, chloroplastic (AHRD V3.3 *** K4B877_SOLLC)	AT1G29930	chlorophyll A/B binding protein 1	shared
Solyc02g071000.1	Chlorophyll a-b binding protein, chloroplastic (AHRD V3.3 *** K4B878_SOLLC)	AT1G29930	chlorophyll A/B binding protein 1	shared
Solyc06g054540.3	CHY-type/CTCHY-type/RING-type Zinc finger protein (AHRD V3.3 *** AT5G18650.1)	AT5G18650	CHY-type/CTCHY-type/RING-type Zinc finger protein	shared
Solyc02g086300.3	Class I glutamine amidotransferase-like superfamily protein (AHRD V3.3 *** AT5G38200.1)	AT5G38200	Class I glutamine amidotransferase-like superfamily protein	shared
Solyc03g118360.2	LOW QUALITY:ATP-dependent Clp protease ATP-binding subunit (AHRD V3.3 *-* A0A072V2V0_MEDTR)	AT5G50920	CLPC homologue 1	shared
Solyc02g068300.3	clade XVI lectin receptor kinase	AT5G06740	Concanavalin A-like lectin protein kinase family protein	shared
Solyc11g006470.2	Core-2/I-branching beta-1,6-N-acetylglucosaminyltransferase family protein (AHRD V3.3 *** AT5G22070.1)	AT5G22070	Core-2/I-branching beta-1,6-N-acetylglucosaminyltransferase family protein	shared
Solyc10g049970.2	Kynurenine formamidase (AHRD V3.3 *** A0A151RRB2_CAJCA)	AT1G44542	Cyclase family protein	shared
Solyc01g073810.2	LOW QUALITY:Cysteine/Histidine-rich C1 domain family protein (AHRD V3.3 *** AT2G44380.1)	AT2G44380	Cysteine/Histidine-rich C1 domain family protein	shared
Solyc01g073820.3	LOW QUALITY:Cysteine/Histidine-rich C1 domain family protein (AHRD V3.3 *** AT2G44380.1)	AT2G44380	Cysteine/Histidine-rich C1 domain family protein	shared
Solyc01g073830.1	LOW QUALITY:Cysteine/Histidine-rich C1 domain family protein (AHRD V3.3 *-* AT2G27660.1)	AT2G44380	Cysteine/Histidine-rich C1 domain family protein	shared
Solyc01g073840.1	LOW QUALITY:Cysteine/Histidine-rich C1 domain family protein (AHRD V3.3 *** AT2G44380.1)	AT2G44380	Cysteine/Histidine-rich C1 domain family protein	shared
Solyc01g073860.3	Cysteine/Histidine-rich C1 domain family protein (AHRD V3.3 *** AT2G44380.1)	AT2G44380	Cysteine/Histidine-rich C1 domain family protein	shared
Solyc09g011260.2	Cysteine/Histidine-rich C1 domain family protein (AHRD V3.3 *** AT2G37820.1)	AT2G37820	Cysteine/Histidine-rich C1 domain family protein	shared
Solyc03g033770.1	P-loop containing nucleoside triphosphate hydrolases superfamily protein (AHRD V3.3 --* AT3G50940.1)	AT3G50930	cytochrome BC1 synthesis	shared
Solyc12g045020.2	Cytochrome P450 family protein (AHRD V3.3 *** B9HFW5_POPTR)	AT5G07990	Cytochrome P450 superfamily protein	shared
Solyc11g007980.2	Cytochrome P450 (AHRD V3.3 *** Q9AVQ2_SOLTU)	AT3G26300	cytochrome P450, family 71, subfamily B, polypeptide 34	shared
Solyc04g063245.1	Cytochrome P450 (AHRD V3.3 *** Q9M7M3_CAPAN)	AT3G26330	cytochrome P450, family 71, subfamily B, polypeptide 37	shared
Solyc07g055440.2	Cytochrome P450 (AHRD V3.3 *** A0A124SAX2_CYNCS)	AT3G14690	cytochrome P450, family 72, subfamily A, polypeptide 15	shared
Solyc02g090350.3	Cytochrome P450 (AHRD V3.3 *** A0A103Y530_CYNCS)	AT2G45550	cytochrome P450, family 76, subfamily C, polypeptide 4	shared
Solyc10g083690.3	Cytochrome P450 (AHRD V3.3 *** Q8H0I7_PETHY)	AT3G52970	cytochrome P450, family 76, subfamily G, polypeptide 1	shared
Solyc04g079660.2	Cytochrome P450 (AHRD V3.3 *** A0A103YCJ3_CYNCS)	AT4G31940	cytochrome P450, family 82, subfamily C, polypeptide 4	shared
Solyc10g080815.1	Cytochrome P450 (AHRD V3.3 *-* A0A103Y9U2_CYNCS)	AT3G26125	cytochrome P450, family 86, subfamily C, polypeptide 2	shared
Solyc06g074420.1	Cytochrome P450 family protein (AHRD V3.3 *** B9HQW0_POPTR)	AT2G27690	cytochrome P450, family 94, subfamily C, polypeptide 1	shared
Solyc10g080813.1	Cytochrome P450 (AHRD V3.3 *-* A2PZD4_IPONI)	AT2G23180	cytochrome P450, family 96, subfamily A, polypeptide 1	shared
Solyc10g080817.1	Cytochrome P450 (AHRD V3.3 *** A2PZD4_IPONI)	AT2G23180	cytochrome P450, family 96, subfamily A, polypeptide 1	shared
Solyc10g078220.2	Cytochrome P450 (AHRD V3.3 *** A9ZT63_COPJA)	AT2G40890	cytochrome P450, family 98, subfamily A, polypeptide 3	shared
Solyc06g082590.1	DNA-binding protein Pti6	AT4G27950	cytokinin response factor 4	shared
Solyc07g055690.1	Serine/threonine-protein kinase (AHRD V3.3 *** G4XXY5_NICAT)	AT1G78820	D-mannose binding lectin protein with Apple-like carbohydrate-binding domain	shared
Solyc10g086565.1	S-acyltransferase (AHRD V3.3 *** A0A0V0I2F0_SOLCH)	AT3G09320	DHHC-type zinc finger family protein	shared
Solyc07g008600.1	LOW QUALITY:Leucine-rich receptor-like kinase family protein (AHRD V3.3 *** A0A072UGF0_MEDTR)	AT2G34930	disease resistance family protein / LRR family protein	shared
Solyc07g008620.1	EIX receptor 1	AT2G34930	disease resistance family protein / LRR family protein	shared
Solyc03g005670.3	Disease resistance protein (CC-NBS-LRR class) family protein (AHRD V3.3 *** G7IID2_MEDTR)	AT5G35450	Disease resistance protein (CC-NBS-LRR class) family	shared
Solyc05g007640.3	Disease resistance protein (NBS-LRR class) family (AHRD V3.3 *-* AT5G38350.1)	AT5G48620	Disease resistance protein (CC-NBS-LRR class) family	shared
Solyc05g044490.2	NBS-LRR resistance protein-like protein (AHRD V3.3 *** A1Y9R1_SOLLC)	AT5G35450	Disease resistance protein (CC-NBS-LRR class) family	shared
Solyc03g025350.3	Divalent ion symporter (AHRD V3.3 *** AT1G02260.2)	AT1G02260	Divalent ion symporter	shared
Solyc05g053760.3	Chaperone protein DNAj, putative (AHRD V3.3 *** B9SYM1_RICCO)	AT4G13830	DNAJ-like 20	shared
Solyc09g092260.3	chaperone protein dnaJ 20	AT4G13830	DNAJ-like 20	shared
Solyc09g065480.2	Type I inositol-1,4,5-trisphosphate 5-phosphatase CVP2 (AHRD V3.3 *** A0A151RLD8_CAJCA)	AT3G63240	DNAse I-like superfamily protein	shared
Solyc02g093750.3	C3H4 type zinc finger protein (DUF23) (AHRD V3.3 *** AT5G40720.3)	AT5G40720	Domain of unknown function (DUF23)	shared
Solyc02g077880.3	auxin repressed/dormancy associated protein	AT2G33830	Dormancy/auxin associated family protein	shared
Solyc03g006360.3	Auxin-repressed protein (AHRD V3.3 *** K7VPG9_SOLTU)	AT2G33830	Dormancy/auxin associated family protein	shared
Solyc06g063060.3	Auxin-repressed protein-like protein (AHRD V3.3 *** Q84KS0_TOBAC)	AT1G54070	Dormancy/auxin associated family protein	shared
Solyc07g063610.3	Dynein light chain family protein (AHRD V3.3 *** B9N570_POPTR)	AT4G27360	Dynein light chain type 1 family protein	shared
Solyc08g066740.3	Early nodulin-like protein 1 (AHRD V3.3 *** A0A151U5D7_CAJCA)	AT1G64640	early nodulin-like protein 8	shared
Solyc12g009560.2	EIN3-binding F-box protein 1	AT2G25490	EIN3-binding F box protein 1	shared
Solyc09g089930.2	ethylene responsive factor E.2	AT3G23240	ethylene response factor 1	shared
Solyc05g052050.1	DNA-binding protein Pti4	AT4G17500	ethylene responsive element binding factor 1	shared
Solyc08g007230.2	Ethylene-responsive transcription factor (AHRD V3.3 *** A0A024CAT9_BRAJU)	AT5G47220	ethylene responsive element binding factor 2	shared
Solyc08g078180.1	Ethylene Response Factor A.1	AT5G47220	ethylene responsive element binding factor 2	shared
Solyc01g079940.3	Eukaryotic aspartyl protease family protein (AHRD V3.3 *** AT1G03220.1)	AT1G03220	Eukaryotic aspartyl protease family protein	shared
Solyc01g080020.2	Eukaryotic aspartyl protease family protein, putative (AHRD V3.3 *** A0A061ELJ0_THECC)	AT1G03230	Eukaryotic aspartyl protease family protein	shared
Solyc01g098770.1	Eukaryotic aspartyl protease family protein, putative (AHRD V3.3 *** A0A061F3Y1_THECC)	AT1G03220	Eukaryotic aspartyl protease family protein	shared
Solyc02g065050.1	Eukaryotic aspartyl protease family protein (AHRD V3.3 *** AT2G39710.1)	AT2G39710	Eukaryotic aspartyl protease family protein	shared
Solyc05g054820.1	LOW QUALITY:Exocyst subunit EXO70 family protein (AHRD V3.3 *** B9HTX5_POPTR)	AT2G39380	exocyst subunit exo70 family protein H2	shared
Solyc06g049050.3	expansin 2	AT2G40610	expansin A8	shared
Solyc02g070110.1	FAD-binding Berberine family protein (AHRD V3.3 *** A0A061GF79_THECC)	AT5G44440	FAD-binding Berberine family protein	shared
Solyc06g065060.1	FAD-binding Berberine family protein (AHRD V3.3 *** A0A061GF79_THECC)	AT5G44440	FAD-binding Berberine family protein	shared
Solyc04g040120.1	Fatty acid desaturase (AHRD V3.3 *** I3RV99_9ERIC)	AT3G12120	fatty acid desaturase 2	shared
Solyc04g040130.1	Fatty acid desaturase (AHRD V3.3 *** I3RV99_9ERIC)	AT3G12120	fatty acid desaturase 2	shared
Solyc12g036520.2	Fatty acid desaturase (AHRD V3.3 *** E5D7U7_9GENT)	AT3G12120	fatty acid desaturase 2	shared
Solyc12g049030.1	Fatty acid desaturase (AHRD V3.3 *** B3SP99_CAPAN)	AT3G12120	fatty acid desaturase 2	shared
Solyc12g100230.1	Fatty acid desaturase (AHRD V3.3 *** E5D7U7_9GENT)	AT3G12120	fatty acid desaturase 2	shared
Solyc12g100250.2	Fatty acid desaturase (AHRD V3.3 *** E5D7U7_9GENT)	AT3G12120	fatty acid desaturase 2	shared
Solyc01g066980.3	Flowering promoting factor 1 (AHRD V3.3 *** A0A061EW40_THECC)	AT5G24860	flowering promoting factor 1	shared
Solyc11g032220.2	12-oxophytodienoate reductase-like protein (AHRD V3.3 *** G7K3S4_MEDTR)	AT1G18020	FMN-linked oxidoreductases superfamily protein	shared
Solyc04g077840.2	F-box family protein (AHRD V3.3 --* D7MPB2_ARALL)	AT5G43190	Galactose oxidase/kelch repeat superfamily protein	shared
Solyc10g080610.1	F-box/kelch-repeat protein (AHRD V3.3 *** A0A172MAC1_VITPS)	AT1G15670	Galactose oxidase/kelch repeat superfamily protein	shared
Solyc10g083880.2	tonoplast intrinsic protein 1.3	AT2G36830	gamma tonoplast intrinsic protein	shared
Solyc01g090760.3	GATA transcription factor (AHRD V3.3 *** K4AZ17_SOLLC)	AT2G45050	GATA transcription factor 2	shared
Solyc06g065010.3	Lipase, GDSL (AHRD V3.3 *** A0A124SDS7_CYNCS)	AT5G40990	GDSL lipase 1	shared
Solyc09g030370.3	GDSL esterase/lipase (AHRD V3.3 *** A0A0B2SPC5_GLYSO)	AT2G30310	GDSL-like Lipase/Acylhydrolase family protein	shared
Solyc04g028470.2	GDSL lipase-like protein (AHRD V3.3 *** H6U1I8_TANCI)	AT1G53920	GDSL-motif lipase 5	shared
Solyc03g119910.3	Le3OH-23b-hydroxylase	AT1G15550	gibberellin 3-oxidase 1	shared
Solyc02g083880.3	Gibberellin-regulated protein 2, putative (AHRD V3.3 *** B9SLF4_RICCO)	AT2G18420	Gibberellin-regulated family protein	shared
Solyc02g089350.3	Gibberellin-regulated family protein (AHRD V3.3 *** A0A061EVH9_THECC)	AT1G74670	Gibberellin-regulated family protein	shared
Solyc12g096480.1	Glutamine dumper 4, putative (AHRD V3.3 *** A0A061GHE4_THECC)	AT4G25760	glutamine dumper 2	shared
Solyc12g096490.1	Glutamine dumper 4, putative (AHRD V3.3 *** A0A061GHE4_THECC)	AT2G24762	glutamine dumper 4	shared
Solyc01g067440.3	Glutaredoxin family protein (AHRD V3.3 *** AT3G21460.1)	AT3G21460	Glutaredoxin family protein	shared
Solyc11g005270.1	LOW QUALITY:Glutaredoxin family protein (AHRD V3.3 *** AT5G13810.1)	AT5G13810	Glutaredoxin family protein	shared
Solyc09g011520.3	Glutathione S-transferase-like protein (AHRD V3.3 *** K7VK72_SOLTU)	AT3G09270	glutathione S-transferase TAU 8	shared
Solyc04g064920.3	Glycolipid transfer protein domain-containing protein (AHRD V3.3 *** A0A118JYI2_CYNCS)	AT3G21260	Glycolipid transfer protein (GLTP) family protein	shared
Solyc01g059965.1	Beta-1,3-glucanase (AHRD V3.3 *** G9G7S0_HEVBR)	AT4G16260	Glycosyl hydrolase superfamily protein	shared
Solyc03g083910.4	symbol=TIV1	AT1G62660	Glycosyl hydrolases family 32 protein	shared
Solyc03g044910.1	GNS1/SUR4 membrane protein family (AHRD V3.3 *** AT4G36830.1)	AT4G36830	GNS1/SUR4 membrane protein family	shared
Solyc02g092570.1	Transcription factor GRAS (AHRD V3.3 *** A0A103Y551_CYNCS)	AT3G49950	GRAS family transcription factor	shared
Solyc10g086380.1	GAI-like protein 1 (AHRD V3.3 *** A1YWN9_9ROSI)	AT1G14920	GRAS family transcription factor family protein	shared
Solyc12g008510.2	Phosphotransferase (AHRD V3.3 *** K4DBT9_SOLLC)	AT2G19860	hexokinase 2	shared
Solyc01g098400.3	Histidine-containing phosphotransfer protein, putative (AHRD V3.3 *** B9REZ5_RICCO)	AT3G21510	histidine-containing phosphotransmitter 1	shared
Solyc08g077730.3	Phosphatidylinositol-4-phosphate 5-kinase 5-like protein (AHRD V3.3 *** A0A0B0PLQ6_GOSAR)	AT4G17080	Histone H3 K4-specific methyltransferase SET7/9 family protein	shared
Solyc02g077590.1	Homeobox-leucine zipper protein family (AHRD V3.3 *-* AT1G69780.1)	AT5G53980	homeobox protein 52	shared
Solyc04g072000.3	Chitinase (AHRD V3.3 *** A0A1B1HY32_9APIA)	AT3G54420	homolog of carrot EP3-3 chitinase	shared
Solyc05g052670.1	LOW QUALITY:HXXXD-type acyl-transferase family protein (AHRD V3.3 *** AT2G39980.1)	AT2G39980	HXXXD-type acyl-transferase family protein	shared
Solyc05g052680.1	LOW QUALITY:HXXXD-type acyl-transferase family protein (AHRD V3.3 *** AT2G39980.1)	AT2G39980	HXXXD-type acyl-transferase family protein	shared
Solyc12g096770.1	LOW QUALITY:HXXXD-type acyl-transferase family protein, putative (AHRD V3.3 *** A0A061E8Z9_THECC)	AT3G26040	HXXXD-type acyl-transferase family protein	shared
Solyc03g032010.3	3-hydroxy-3-methylglutaryl-coenzyme A reductase 3 (AHRD V3.3 *** HMDH3_SOLTU)	AT1G76490	hydroxy methylglutaryl CoA reductase 1	shared
Solyc03g032020.3	3-hydroxy-3-methylglutaryl coenzyme A reductase (AHRD V3.3 *** K4BFH3_SOLLC)	AT1G76490	hydroxy methylglutaryl CoA reductase 1	shared
Solyc05g052030.1	ethylene response factor 4	AT5G07580	Integrase-type DNA-binding superfamily protein	shared
Solyc05g052040.1	Ethylene-responsive transcription factor (AHRD V3.3 *** M4WYH8_GOSHI)	AT5G51190	Integrase-type DNA-binding superfamily protein	shared
Solyc06g033850.3	Dehydration responsive element-binding factor protein (AHRD V3.3 --* A0A0K0K9Y3_ELECO)	AT1G75490	Integrase-type DNA-binding superfamily protein	shared
Solyc11g012980.1	Ethylene-responsive transcription factor (AHRD V3.3 *** A0A0K9P1G2_ZOSMR)	AT1G21910	Integrase-type DNA-binding superfamily protein	shared
Solyc09g090900.3	Aconitate hydratase (AHRD V3.3 *** A0A059LL79_9CHLO)	AT4G13430	isopropyl malate isomerase large subunit 1	shared
Solyc08g036640.3	Jasmonate zim-domain protein (AHRD V3.3 *** G7LE60_MEDTR)	AT1G30135	jasmonate-zim-domain protein 8	shared
Solyc03g020010.1	miraculin	AT1G17860	Kunitz family trypsin and protease inhibitor protein	shared
Solyc03g098680.3	Kunitz trypsin inhibitor (AHRD V3.3 *** Q4W181_POPTN)	AT1G73325	Kunitz family trypsin and protease inhibitor protein	shared
Solyc03g098720.3	Kunitz trypsin inhibitor (AHRD V3.3 *** Q4W188_POPTN)	AT1G73325	Kunitz family trypsin and protease inhibitor protein	shared
Solyc03g098730.1	Kunitz trypsin inhibitor (AHRD V3.3 *** B8Y888_TOBAC)	AT1G17860	Kunitz family trypsin and protease inhibitor protein	shared
Solyc03g098740.1	Kunitz trypsin inhibitor (AHRD V3.3 *** B8Y888_TOBAC)	AT1G17860	Kunitz family trypsin and protease inhibitor protein	shared
Solyc04g072280.3	Laccase (AHRD V3.3 *** A0A022Q9N6_ERYGU)	AT5G09360	laccase 14	shared
Solyc10g081970.2	Late embryogenesis abundant (LEA) hydroxyproline-rich glycoprotein family (AHRD V3.3 *** AT2G35980.1)	AT2G35980	Late embryogenesis abundant (LEA) hydroxyproline-rich glycoprotein family	shared
Solyc07g005110.3	Receptor-like kinase CHRK1 (AHRD V3.3 *** Q9SWX8_TOBAC)	AT3G16030	lectin protein kinase family protein	shared
Solyc10g050110.1	Leucine-rich repeat receptor-like protein kinase family (AHRD V3.3 *** A0A0K9PL83_ZOSMR)	AT3G19320	Leucine-rich repeat (LRR) family protein	shared
Solyc04g012100.2	Leucine-rich receptor-like protein kinase family protein (AHRD V3.3 *** AT5G46330.2)	AT3G47570	Leucine-rich repeat protein kinase family protein	shared
Solyc05g006670.1	LOW QUALITY:Leucine-rich repeat receptor protein kinase family protein (AHRD V3.3 *** A0A061E5L2_THECC)	AT4G20140	Leucine-rich repeat transmembrane protein kinase	shared
Solyc05g007230.3	Receptor-like kinase (AHRD V3.3 *** A0A0K9NLV5_ZOSMR)	AT4G20140	Leucine-rich repeat transmembrane protein kinase	shared
Solyc03g096540.3	PLAT domain-containing protein 1 (AHRD V3.3 *** PLAT1_ARATH)	AT2G22170	Lipase/lipooxygenase, PLAT/LH2 family protein	shared
Solyc10g075150.2	Non-specific lipid-transfer protein (AHRD V3.3 *** M1AVB3_SOLTU)	AT3G51590	lipid transfer protein 12	shared
Solyc08g029000.3	Lipoxygenase (AHRD V3.3 *** Q43800_TOBAC)	AT1G55020	lipoxygenase 1	shared
Solyc02g092550.3	LOB domain-containing protein, putative (AHRD V3.3 *** B9SGY6_RICCO)	AT5G67420	LOB domain-containing protein 37	shared
Solyc03g119530.3	LOB domain protein 40 (AHRD V3.3 *** K7VSW9_SOLTU)	AT3G02550	LOB domain-containing protein 41	shared
Solyc02g014430.3	Equilibrative nucleoside transporter (AHRD V3.3 *** A0A103XTG7_CYNCS)	AT4G05120	Major facilitator superfamily protein	shared
Solyc02g062890.2	polyol monosaccharide transporter 5	AT4G36670	Major facilitator superfamily protein	shared
Solyc02g063020.2	Major facilitator superfamily transporter (AHRD V3.3 *** A0A0K9PQR0_ZOSMR)	AT4G36790	Major facilitator superfamily protein	shared
Solyc04g055080.3	Major facilitator superfamily transporter (AHRD V3.3 *** A0A0K0KFR2_CARHR)	AT5G10190	Major facilitator superfamily protein	shared
Solyc05g051900.3	Major facilitator superfamily transporter (AHRD V3.3 *** A0A0K0KFR2_CARHR)	AT5G10190	Major facilitator superfamily protein	shared
Solyc06g054270.3	Sugar transporter protein 11	AT5G26250	Major facilitator superfamily protein	shared
Solyc10g083940.1	Nodulin-like / Major Facilitator Superfamily protein (AHRD V3.3 *** A0A0K9NWX1_ZOSMR)	AT2G39210	Major facilitator superfamily protein	shared
Solyc12g006050.2	Major facilitator superfamily protein (AHRD V3.3 *** AT3G21670.1)	AT3G21670	Major facilitator superfamily protein	shared
Solyc02g091080.2	Protein DETOXIFICATION (AHRD V3.3 *** K4BCQ7_SOLLC)	AT2G04040	MATE efflux family protein	shared
Solyc03g044790.3	methylesterase AY455313	AT2G23610	methyl esterase 3	shared
Solyc03g121920.3	Mitochondrial carrier protein (AHRD V3.3 *** F8WLA3_CITUN)	AT1G72820	Mitochondrial substrate carrier family protein	shared
Solyc06g066680.3	Mitochondrial carrier protein (AHRD V3.3 *** A0A0K9PC13_ZOSMR)	AT1G79900	Mitochondrial substrate carrier family protein	shared
Solyc01g087040.2	PsbP-like (AHRD V3.3 *** A0A0U9HL69_KLEFL)	AT3G63540	Mog1/PsbP/DUF1795-like photosystem II reaction center PsbP family protein	shared
Solyc04g079360.1	R2R3MYB transcription factor 77	AT3G50060	myb domain protein 77	shared
Solyc05g008235.1	MYB transcription factor (AHRD V3.3 *** W6JQG2_GENTR)	AT1G71030	MYB-like 2	shared
Solyc00g005094.1	Glucose-6-phosphate 1-dehydrogenase 3, chloroplastic (AHRD V3.3 --* G6PD3_ARATH)	NA	NA	shared
Solyc00g022090.2	Formyltetrahydrofolate deformylase 1, mitochondrial (AHRD V3.3 --* PURU1_ARATH)	NA	NA	shared
Solyc01g009710.1	LOW QUALITY:PLAT/LH2 domain-containing lipoxygenase family protein (AHRD V3.3 --* AT1G72520.1)	NA	NA	shared
Solyc01g108700.3	LOW QUALITY:transcription initiation factor TFIID subunit 1b-like protein (AHRD V3.3 -** AT3G19030.1)	NA	NA	shared
Solyc01g108710.3	transcription initiation factor TFIID subunit 1b-like protein (AHRD V3.3 -** AT3G19030.1)	NA	NA	shared
Solyc02g068170.1	LOW QUALITY:CAP-gly domain linker (AHRD V3.3 --* AT3G55060.3)	NA	NA	shared
Solyc02g078665.1	Hydroxyproline-rich glycoprotein family protein, putative (AHRD V3.3 --* A0A072UP10_MEDTR)	NA	NA	shared
Solyc02g082330.1	LOW QUALITY:P-loop containing nucleoside triphosphate hydrolases superfamily protein (AHRD V3.3 --* AT1G12770.2)	NA	NA	shared
Solyc02g092890.1	LOW QUALITY:Transmembrane protein, putative (AHRD V3.3 -** A0A072UNU4_MEDTR)	NA	NA	shared
Solyc03g025960.1	LOW QUALITY:CLAVATA3/ESR (CLE)-related protein 2 (AHRD V3.3 -** CLE14_ARATH)	NA	NA	shared
Solyc03g098760.2	Kunitz-type protease inhibitor-like protein (AHRD V3.3 *** Q2XPY0_SOLTU)	NA	NA	shared
Solyc03g112120.2	Protein prune (AHRD V3.3 *** A0A1D1YXQ3_9ARAE)	NA	NA	shared
Solyc04g009870.1	Beta-carotene hydroxylase 2, chloroplastic (AHRD V3.3 --* BCH2_CAPAN)	NA	NA	shared
Solyc04g011735.1	methyl-CPG-binding domain 7 (AHRD V3.3 --* AT5G59800.1)	NA	NA	shared
Solyc04g011750.3	Protein TIC 214 (AHRD V3.3 --* TI214_VITVI)	NA	NA	shared
Solyc04g024430.3	DNA polymerase epsilon catalytic subunit (AHRD V3.3 --* AT1G08260.1)	NA	NA	shared
Solyc04g071590.3	Abscisic acid stress ripening 3%2C ASR3	NA	NA	shared
Solyc04g071600.3	Abscisic acid stress ripening 5	NA	NA	shared
Solyc04g072320.2	RNA polymerase I subunit 43 (AHRD V3.3 --* AT1G60620.2)	NA	NA	shared
Solyc04g072620.1	LOW QUALITY:sterile alpha motif (SAM) domain-containing protein (AHRD V3.3 --* AT2G45700.2)	NA	NA	shared
Solyc04g076730.1	LOW QUALITY:Transmembrane protein, putative (AHRD V3.3 *** G7JEX2_MEDTR)	NA	NA	shared
Solyc05g046270.3	Protein Ycf2 (AHRD V3.3 --* YCF2_OENGL)	NA	NA	shared
Solyc06g036770.1	LOW QUALITY:CASP-like protein (AHRD V3.3 --* A0A0L9UWM4_PHAAN)	NA	NA	shared
Solyc06g050140.1	LOW QUALITY:Plant regulator RWP-RK family protein (AHRD V3.3 --* AT2G17150.6)	NA	NA	shared
Solyc06g062420.3	transmembrane protein (AHRD V3.3 -** AT3G21351.1)	NA	NA	shared
Solyc06g082350.3	Biotin carboxyl carrier acetyl-CoA carboxylase (AHRD V3.3 --* G7KRK6_MEDTR)	NA	NA	shared
Solyc07g005300.1	LOW QUALITY:RING-finger, DEAD-like helicase, PHD and SNF2 domain-containing protein (AHRD V3.3 --* AT2G40770.3)	NA	NA	shared
Solyc07g007770.2	zinc finger WD40 repeat protein 1 (AHRD V3.3 --* AT4G25440.3)	NA	NA	shared
Solyc07g044970.1	LOW QUALITY:P-loop containing nucleoside triphosphate hydrolases superfamily protein (AHRD V3.3 --* AT2G16790.5),Pfam:PF13671	NA	NA	shared
Solyc07g054720.2	Type II proteinase inhibitor family protein (AHRD V3.3 -** B6SSS5_MAIZE)	NA	NA	shared
Solyc07g056080.1	LOW QUALITY:Acidic endochitinase SE2 (AHRD V3.3 --* CHIE_BETVU)	NA	NA	shared
Solyc08g023510.2	Serine incorporator 4 (AHRD V3.3 *** A0A1D1XYQ2_9ARAE)	NA	NA	shared
Solyc08g067640.1	LOW QUALITY:Zinc finger C-x8-C-x5-C-x3-H type family protein (AHRD V3.3 --* AT1G21580.8)	NA	NA	shared
Solyc09g008080.3	Ribosomal protein S5/Elongation factor G/III/V family protein (AHRD V3.3 --* AT1G56070.3)	NA	NA	shared
Solyc09g015030.1	LOW QUALITY:cation/H+ exchanger 18 (AHRD V3.3 --* AT5G41610.3)	NA	NA	shared
Solyc09g075840.3	adenosine-5'-phosphosulfate (APS) kinase 4 (AHRD V3.3 --* AT5G67520.3)	NA	NA	shared
Solyc09g098510.3	Extensin (Class I) (AHRD V3.3 *-* Q01945_SOLLC)	NA	NA	shared
Solyc10g006150.3	DUF4408 domain protein (AHRD V3.3 *** G7K8L0_MEDTR)	NA	NA	shared
Solyc10g006750.3	ABC-2 and Plant PDR ABC-type transporter family protein (AHRD V3.3 --* AT4G15233.8)	NA	NA	shared
Solyc10g039230.1	S-locus lectin protein kinase family protein (AHRD V3.3 --* AT1G61490.7)	NA	NA	shared
Solyc10g050510.1	LOW QUALITY:transcription initiation factor TFIID subunit 1b-like protein (AHRD V3.3 -** AT3G19030.1)	NA	NA	shared
Solyc10g050570.1	LOW QUALITY:hydrolases, acting on ester bond (AHRD V3.3 --* AT3G27325.3)	NA	NA	shared
Solyc10g051225.1	Leucine-rich receptor-like protein kinase family protein (AHRD V3.3 --* AT4G20270.1)	NA	NA	shared
Solyc10g051230.1	Leucine-rich repeat receptor-like protein kinase family protein (AHRD V3.3 --* AT4G26540.1)	NA	NA	shared
Solyc10g079780.1	Dolichyl-diphosphooligosaccharide--protein glycosyltransferase subunit DAD1 (AHRD V3.3 -** DAD1_ORYSI)	NA	NA	shared
Solyc10g080620.1	LOW QUALITY:NAD(P)H-quinone oxidoreductase subunit 2 A, chloroplastic (AHRD V3.3 --* NU2C1_HORVU)	NA	NA	shared
Solyc10g084070.1	LOW QUALITY:Endoglucanase (AHRD V3.3 --* A0A022RID5_ERYGU)	NA	NA	shared
Solyc11g005480.2	Citrate binding protein (AHRD V3.3 *** Q8H9C1_SOLTU)	NA	NA	shared
Solyc11g051125.1	Core-2/I-branching beta-1,6-N-acetylglucosaminyltransferase family protein (AHRD V3.3 --* AT5G14550.2)	NA	NA	shared
Solyc12g036310.1	LOW QUALITY:NAD(P)H-quinone oxidoreductase subunit 5, chloroplastic (AHRD V3.3 --* NU5C_CHLSC)	NA	NA	shared
Solyc12g040470.2	non-specific phospholipase C2 (AHRD V3.3 --* AT2G26870.1)	NA	NA	shared
Solyc12g088870.1	PHD finger transcription factor (AHRD V3.3 --* AT5G58610.9)	NA	NA	shared
Solyc12g094615.1	Ring/U-Box superfamily protein (AHRD V3.3 --* AT2G27950.3)	NA	NA	shared
Solyc12g096210.2	F-box/RNI-like superfamily protein (AHRD V3.3 --* AT1G06630.9)	NA	NA	shared
Solyc12g096960.2	Major allergen d 1 (AHRD V3.3 *** Q8L6K9_MALDO)	NA	NA	shared
Solyc12g098757.1	Extensin-like protein (AHRD V3.3 *-* Q7DLZ6_VIGUN)	NA	NA	shared
sly-MIR390a	NA	NA	NA	shared
Solyc07g066330.3	NAC domain-containing protein (AHRD V3.3 *** W0C8Y8_9FABA)	AT1G56010	NAC domain containing protein 1	shared
Solyc10g083170.2	NAD(P)-binding Rossmann-fold superfamily protein (AHRD V3.3 *** AT1G52340.1),Pfam:PF13561	AT1G52340	NAD(P)-binding Rossmann-fold superfamily protein	shared
Solyc12g045030.2	NAD(P)-binding Rossmann-fold superfamily protein (AHRD V3.3 *** AT3G55310.1)	AT3G55310	NAD(P)-binding Rossmann-fold superfamily protein	shared
Solyc09g097960.3	NAD(P)-linked oxidoreductase superfamily protein (AHRD V3.3 *** AT1G60710.1)	AT1G60710	NAD(P)-linked oxidoreductase superfamily protein	shared
Solyc11g067250.2	Poly [ADP-ribose] polymerase (AHRD V3.3 *** K4D9Y2_SOLLC)	AT5G22470	NAD+ ADP-ribosyltransferases;NAD+ ADP-ribosyltransferases	shared
Solyc05g007630.3	Late blight resistance protein, putative (AHRD V3.3 *** Q6L421_SOLDE)	AT1G50180	NB-ARC domain-containing disease resistance protein	shared
Solyc06g064720.1	Disease resistance protein (NBS-LRR class) family (AHRD V3.3 *-* AT5G40060.1)	AT3G46530	NB-ARC domain-containing disease resistance protein	shared
Solyc06g072620.3	Bidirectional sugar transporter SWEET (AHRD V3.3 *-* K4C8Y2_SOLLC)	AT3G48740	Nodulin MtN3 family protein	shared
Solyc09g014940.2	Wound-induced protein 1 (AHRD V3.3 *** A0A0B2R5F9_GLYSO)	AT5G01740	Nuclear transport factor 2 (NTF2) family protein	shared
Solyc03g094120.3	Glycosyltransferase (AHRD V3.3 *** A0A164WZ41_DAUCA)	AT1G28710	Nucleotide-diphospho-sugar transferase family protein	shared
Solyc08g078650.3	Nucleotide-diphospho-sugar transferases superfamily protein (AHRD V3.3 *** AT2G35710.1)	AT2G35710	Nucleotide-diphospho-sugar transferases superfamily protein	shared
Solyc11g007970.2	4-coumarate--CoA ligase like (AHRD V3.3 *** A0A0K9P263_ZOSMR)	AT1G20510	OPC-8:0 CoA ligase1	shared
Solyc08g080640.2	Osmotin-like protein (Fragment) IPR017949 Thaumatin, conserved site IPR001938	AT4G11650	osmotin 34	shared
Solyc08g080670.1	Pathogenesis-related 5-like protein	AT4G11650	osmotin 34	shared
Solyc01g007810.1	LOW QUALITY:ovate family protein 3	AT5G04820	ovate family protein 13	shared
Solyc03g031890.3	Oxidative stress 3, putative isoform 2 (AHRD V3.3 *** A0A061GIQ6_THECC)	AT5G56550	oxidative stress 3	shared
Solyc06g066420.3	Oxidative stress 3, putative isoform 1 (AHRD V3.3 *** A0A061GC09_THECC)	AT5G56550	oxidative stress 3	shared
Solyc07g066180.2	Tir-nbs resistance protein (AHRD V3.3 *** A0A061F4L1_THECC)	AT5G56220	P-loop containing nucleoside triphosphate hydrolases superfamily protein	shared
Solyc05g056030.3	Patatin (AHRD V3.3 *** K4C2S8_SOLLC)	AT2G39220	PATATIN-like protein 6	shared
Solyc04g064880.3	Pathogen-related protein (AHRD V3.3 *** A0A1D1XC89_9ARAE)	AT1G78780	pathogenesis-related family protein	shared
Solyc10g084840.2	Pathogenesis-related thaumatin family protein (AHRD V3.3 *** A0A072TZL3_MEDTR)	AT5G02140	Pathogenesis-related thaumatin superfamily protein	shared
Solyc11g008640.1	Flowering locus T (AHRD V3.3 *** D5LM18_PETHY)	AT1G65480	PEBP (phosphatidylethanolamine-binding protein) family protein	shared
Solyc01g095690.2	Pentatricopeptide repeat-containing protein, putative (AHRD V3.3 *** A0A061DSI9_THECC)	AT4G01030	pentatricopeptide (PPR) repeat-containing protein	shared
Solyc11g064750.2	Pentatricopeptide repeat-containing family protein (AHRD V3.3 *** B9H819_POPTR)	AT2G42920	Pentatricopeptide repeat (PPR-like) superfamily protein	shared
Solyc12g008550.2	Peptidase M28 family protein (AHRD V3.3 *-* AT5G19740.1)	AT5G19740	Peptidase M28 family protein	shared
Solyc02g079500.4	Peroxidase (AHRD V1 **** Q50LG4_TOBAC)%3B contains Interpro domain(s) IPR019793 Peroxidases heam-ligand binding site IPR019794 Peroxidase%2C active site IPR002016 Haem peroxidase%2C plant/fungal/bacterial	AT5G05340	Peroxidase superfamily protein	shared
Solyc02g094180.3	Peroxidase (AHRD V3.3 *** K4BDL3_SOLLC)	AT4G37530	Peroxidase superfamily protein	shared
Solyc07g055190.3	Peroxidase (AHRD V3.3 *** K4CG58_SOLLC)	AT5G05340	Peroxidase superfamily protein	shared
Solyc11g018775.1	Peroxidase (AHRD V3.3 *** M1CN26_SOLTU)	AT1G14550	Peroxidase superfamily protein	shared
Solyc11g018777.1	Peroxidase (AHRD V3.3 *** K4D6T3_SOLLC)	AT1G14550	Peroxidase superfamily protein	shared
Solyc11g018800.2	Peroxidase (AHRD V3.3 *** K4D6T3_SOLLC)	AT1G14550	Peroxidase superfamily protein	shared
Solyc00g282510.2	Phenylalanine ammonia-lyase (AHRD V3.3 *** PAL1_TOBAC)	AT2G37040	PHE ammonia lyase 1	shared
Solyc10g011920.2	Phenylalanine ammonia-lyase (AHRD V3.3 *** A0A124SBF6_CYNCS)	AT2G37040	PHE ammonia lyase 1	shared
Solyc01g091700.3	F-box family protein (AHRD V3.3 *** B9IC61_POPTR)	AT3G61060	phloem protein 2-A13	shared
Solyc10g017960.2	F-box protein PP2-A13 (AHRD V3.3 *** P2A13_ARATH)	AT3G61060	phloem protein 2-A13	shared
Solyc06g034290.3	Glycerol-3-phosphate transporter, putative (AHRD V3.3 *** B9R9S6_RICCO)	AT3G47420	phosphate starvation-induced gene 3	shared
Solyc09g090070.1	phosphate transporter 1	AT2G38940	phosphate transporter 1;4	shared
Solyc04g074400.1	Phosphate-responsive 1 family protein, putative (AHRD V3.3 *** A0A061FGC9_THECC)	AT4G08950	Phosphate-responsive 1 family protein	shared
Solyc04g074440.1	Phosphate-responsive 1 family protein (AHRD V3.3 *** A0A061FGW0_THECC)	AT4G08950	Phosphate-responsive 1 family protein	shared
Solyc04g074450.1	Phosphate-responsive 1 family protein (AHRD V3.3 *** AT4G08950.1)	AT4G08950	Phosphate-responsive 1 family protein	shared
Solyc07g043130.3	Phototropic-responsive NPH3 family protein (AHRD V3.3 *** AT2G30520.1)	AT2G30520	Phototropic-responsive NPH3 family protein	shared
Solyc06g066590.3	Plant cadmium resistance 2 (AHRD V3.3 *** A0A0K9NVT8_ZOSMR)	AT1G52200	PLAC8 family protein	shared
Solyc01g005470.3	PLANT CADMIUM RESISTANCE 2 (AHRD V3.3 *** AT1G14870.1)	AT1G14870	PLANT CADMIUM RESISTANCE 2	shared
Solyc12g017480.2	Leucine-rich repeat-containing protein (AHRD V3.3 *** A0A118K791_CYNCS)	AT2G19330	plant intracellular ras group-related LRR 6	shared
Solyc09g075330.3	Pectinesterase (AHRD V3.3 *** K4CVB0_SOLLC)	AT1G02810	Plant invertase/pectin methylesterase inhibitor superfamily	shared
Solyc03g083730.1	Plant invertase/pectin methylesterase inhibitor superfamily protein (AHRD V3.3 *** AT5G62360.1)	AT5G62360	Plant invertase/pectin methylesterase inhibitor superfamily protein	shared
Solyc05g054750.3	Plant protein 1589 of unknown function (AHRD V3.3 *** AT3G55240.1)	AT3G55240	Plant protein 1589 of unknown function	shared
Solyc12g094610.2	U-box domain-containing 15-like protein (AHRD V3.3 *** A0A0B0PZ68_GOSAR)	AT5G42340	Plant U-Box 15	shared
Solyc05g055990.3	plasma membrane intrinsic protein 2.12	AT3G53420	plasma membrane intrinsic protein 2A	shared
Solyc05g053600.3	Pleiotropic drug resistance ABC transporter (AHRD V3.3 *** W0TUG3_ACAMN)	AT1G15520	pleiotropic drug resistance 12	shared
Solyc05g053610.2	Pleiotropic drug resistance ABC transporter (AHRD V3.3 *** W0TUG3_ACAMN)	AT1G15520	pleiotropic drug resistance 12	shared
Solyc09g091670.3	Pleiotropic drug resistance ABC transporter (AHRD V3.3 *** W0TUG3_ACAMN)	AT1G15520	pleiotropic drug resistance 12	shared
Solyc06g073165.1	LOW QUALITY:BURP domain-containing protein (AHRD V3.3 *-* AT1G23760.1)	AT1G70370	polygalacturonase 2	shared
Solyc08g076960.1	Abscisic acid receptor PYL1 (AHRD V3.3 *** M1BH64_SOLTU)	AT4G17870	Polyketide cyclase/dehydrase and lipid transport superfamily protein	shared
Solyc04g076220.3	AT hook motif DNA-binding family protein (AHRD V3.3 *** G7J554_MEDTR)	AT5G49700	Predicted AT-hook DNA-binding family protein	shared
Solyc12g087950.1	AT hook motif DNA-binding family protein (AHRD V3.3 *** G7J554_MEDTR)	AT5G49700	Predicted AT-hook DNA-binding family protein	shared
Solyc12g088040.2	Kinase, putative (AHRD V3.3 *** A0A061FTR2_THECC)	AT5G02070	Protein kinase family protein	shared
Solyc03g083470.3	Receptor-like kinase (AHRD V3.3 *** A0A072VF58_MEDTR)	AT1G66920	Protein kinase superfamily protein	shared
Solyc03g083480.3	Membrane receptor-like protein 1 (AHRD V3.3 *** B3TJG2_CAPAN)	AT5G38260	Protein kinase superfamily protein	shared
Solyc06g060510.2	LOW QUALITY:Plant/F17O14-7 protein (AHRD V3.3 *** G7KY86_MEDTR)	AT3G08600	Protein of unknown function (DUF1191)	shared
Solyc03g083490.3	DUF1442 family protein (AHRD V3.3 *** B7FH79_MEDTR)	AT5G62280	Protein of unknown function (DUF1442)	shared
Solyc02g067050.3	UPF0301 protein (AHRD V3.3 *** A0A0B2NUC1_GLYSO)	AT3G29240	Protein of unknown function (DUF179)	shared
Solyc06g008990.1	LOW QUALITY:Fantastic four-like protein (AHRD V3.3 *-* G7IE53_MEDTR)	AT4G02810	Protein of unknown function (DUF3049)	shared
Solyc02g078150.3	DUF506 family protein (AHRD V3.3 *** G7IPT8_MEDTR)	AT4G32480	Protein of unknown function (DUF506)	shared
Solyc02g078160.3	DUF506 family protein (AHRD V3.3 *** G7IPT8_MEDTR)	AT4G32480	Protein of unknown function (DUF506)	shared
Solyc06g007580.1	LOW QUALITY:DUF506 family protein (AHRD V3.3 *** G7LF52_MEDTR)	AT3G07350	Protein of unknown function (DUF506)	shared
Solyc09g014820.3	LURP-one-like protein (AHRD V3.3 *** G7KW19_MEDTR)	AT5G01750	Protein of unknown function (DUF567)	shared
Solyc03g123460.3	DUF581 family protein (AHRD V3.3 *-* G7L953_MEDTR)	AT1G53903	Protein of unknown function (DUF581)	shared
Solyc06g082780.3	Calcium uniporter, mitochondrial (AHRD V3.3 *** A0A0B0N729_GOSAR)	AT1G09575	Protein of unknown function (DUF607)	shared
Solyc09g057580.3	UV-B-induced protein, chloroplastic (AHRD V3.3 *** A0A199VW76_ANACO)	AT3G07310	Protein of unknown function (DUF760)	shared
Solyc08g065320.3	green ripe-like 1	AT2G26070	Protein of unknown function (DUF778)	shared
Solyc11g010360.2	MIZU-KUSSEI-like protein (Protein of unknown function, DUF617) (AHRD V3.3 *** AT5G65340.1)	AT5G65340	Protein of unknown function, DUF617	shared
Solyc10g084410.2	Protein phosphatase 2C family protein (AHRD V3.3 *** AT3G12620.2)	AT3G12620	Protein phosphatase 2C family protein	shared
Solyc12g013710.2	light dependent NADH:protochlorophyllide oxidoreductase 1	AT5G54190	protochlorophyllide oxidoreductase A	shared
Solyc04g074870.3	Purine permease-like protein (AHRD V3.3 *** G7J4H5_MEDTR)	AT1G28230	purine permease 1	shared
Solyc08g077370.3	Purine permease (AHRD V3.3 *** G7IK92_MEDTR)	AT1G44750	purine permease 11	shared
Solyc06g050500.2	Abscisic acid receptor (AHRD V3.3 *** G7KT83_MEDTR)	AT2G38310	PYR1-like 4	shared
Solyc05g052420.2	Abscisic acid receptor (AHRD V3.3 *** G7JKP6_MEDTR)	AT2G40330	PYR1-like 6	shared
Solyc10g005320.3	Tryptophan synthase (AHRD V3.3 *** K4CX65_SOLLC)	AT5G28237	Pyridoxal-5'-phosphate-dependent enzyme family protein	shared
Solyc06g051560.3	Flavoprotein wrbA (AHRD V3.3 *-* A0A1D1ZBK1_9ARAE)	AT4G27270	Quinone reductase family protein	shared
Solyc06g076450.3	Ras-related protein, expressed (AHRD V3.3 *** D8L9F8_WHEAT)	AT1G07410	RAB GTPase homolog A2B	shared
Solyc11g011180.2	Leucine-rich receptor-like kinase family protein, putative (AHRD V3.3 *** G7JP58_MEDTR)	AT1G74190	receptor like protein 15	shared
Solyc10g076500.2	Leucine-rich-repeat receptor-like protein (AHRD V3.3 *** A0A0D4WVW2_GOSBA)	AT2G33060	receptor like protein 27	shared
Solyc12g009770.1	LOW QUALITY:Leucine-rich-repeat receptor-like protein (AHRD V3.3 *** A0A097BR55_GOSBA)	AT3G11010	receptor like protein 34	shared
Solyc01g009930.2	Leucine-rich repeat receptor-like protein kinase family protein (AHRD V3.3 *-* AT4G08850.2)	AT3G11080	receptor like protein 35	shared
Solyc12g009740.2	Leucine-rich repeat receptor-like protein kinase family protein (AHRD V3.3 *-* AT3G24240.1)	AT3G11080	receptor like protein 35	shared
Solyc12g009520.2	Leucine-rich-repeat receptor-like protein (AHRD V3.3 *** A0A0D4WVW2_GOSBA)	AT1G45616	receptor like protein 6	shared
Solyc12g009780.1	LOW QUALITY:Leucine-rich-repeat receptor-like protein (AHRD V3.3 *** A0A0D4WVW2_GOSBA)	AT1G45616	receptor like protein 6	shared
Solyc12g036793.1	Leucine-rich repeat receptor-like protein kinase family protein (AHRD V3.3 *-* AT4G08850.1)	AT1G45616	receptor like protein 6	shared
Solyc01g067020.3	Atypical receptor-like kinase 1 (AHRD V3.3 *** C5H8K0_SOLLC)	AT1G48480	receptor-like kinase 1	shared
Solyc08g082460.3	Kinase (AHRD V3.3 *-* A0A059Q131_9POAL)	AT1G48480	receptor-like kinase 1	shared
Solyc09g075910.1	Serine/threonine-protein kinase (AHRD V3.3 *** K4CVG8_SOLLC)	AT5G60900	receptor-like protein kinase 1	shared
Solyc09g075920.1	Serine/threonine-protein kinase (AHRD V3.3 *** K4CVG9_SOLLC)	AT5G60900	receptor-like protein kinase 1	shared
Solyc09g057960.1	Cysteine-rich RLK (Receptor-like kinase) protein (AHRD V3.3 *** G7KY09_MEDTR)	AT5G48540	receptor-like protein kinase-related family protein	shared
Solyc04g007000.1	AP2/B3 transcription factor family protein (AHRD V3.3 *** AT1G25560.1)	AT1G13260	related to ABI3/VP1 1	shared
Solyc12g056980.1	Ethylene-responsive element binding-factor (AHRD V3.3 *** K9UTK3_JATCU)	AT1G78080	related to AP2 4	shared
Solyc05g007950.3	LERNALE L.esculentum ribonuclease le	AT2G02990	ribonuclease 1	shared
Solyc10g008400.1	RING/U-box superfamily protein (AHRD V3.3 *-* AT1G74990.1)	AT4G03510	RING membrane-anchor 1	shared
Solyc03g031830.1	RING/U-box superfamily protein (AHRD V3.3 *** AT4G03965.1)	AT4G03965	RING/U-box superfamily protein	shared
Solyc11g005280.1	RING/U-box superfamily protein (AHRD V3.3 *** AT1G49230.1)	AT1G49230	RING/U-box superfamily protein	shared
Solyc11g006450.2	RING/U-box superfamily protein (AHRD V3.3 *** A0A061FQW5_THECC)	AT2G35910	RING/U-box superfamily protein	shared
Solyc03g044210.3	Vicilin-like protein (AHRD V3.3 *** A0A0S3B0K0_COCNU)	AT2G28490	RmlC-like cupins superfamily protein	shared
Solyc03g113580.1	Germin-like protein (AHRD V3.3 *** Q8H2A6_ANACO)	AT1G18980	RmlC-like cupins superfamily protein	shared
Solyc11g006730.1	Germin-like protein 1 (AHRD V3.3 *** B9HVV6_POPTR)	AT1G18980	RmlC-like cupins superfamily protein	shared
Solyc12g010900.1	F-box protein (AHRD V3.3 *** T1RVG4_STRHE)	AT2G42620	RNI-like superfamily protein	shared
Solyc02g092580.3	Peroxidase (AHRD V3.3 *** K4BD54_SOLLC)	AT5G67400	root hair specific 19	shared
Solyc07g055410.2	Serine/threonine-protein kinase (AHRD V3.3 *-* A0A0D4BT35_SOLPN)	AT4G32300	S-domain-2 5	shared
Solyc09g011330.2	Serine/threonine-protein kinase (AHRD V3.3 *** M1C8X1_SOLTU)	AT2G19130	S-locus lectin protein kinase family protein	shared
Solyc12g088390.1	Zinc-finger protein (AHRD V3.3 *** Q40899_PETHY)	AT1G27730	salt tolerance zinc finger	shared
Solyc01g110770.2	Small auxin up-regulated RNA11	AT5G18030	SAUR-like auxin-responsive protein family	shared
Solyc01g110780.1	SAUR-like auxin-responsive protein family (AHRD V3.3 *** AT4G38840.1)	AT4G38840	SAUR-like auxin-responsive protein family	shared
Solyc01g110800.3	Small auxin up-regulated RNA19	AT4G38840	SAUR-like auxin-responsive protein family	shared
Solyc04g053030.1	SAUR-like auxin-responsive protein family, putative (AHRD V3.3 *** A0A061E5G9_THECC)	AT1G29500	SAUR-like auxin-responsive protein family	shared
Solyc06g053260.1	SAUR-like auxin-responsive family protein (AHRD V3.3 *** G7J880_MEDTR)	AT4G00880	SAUR-like auxin-responsive protein family	shared
Solyc10g018340.1	Small auxin up-regulated RNA71	AT2G45210	SAUR-like auxin-responsive protein family	shared
Solyc11g011630.2	SAUR-like auxin-responsive protein family, putative (AHRD V3.3 *** A0A061E5G9_THECC)	AT1G29500	SAUR-like auxin-responsive protein family	shared
Solyc11g011670.1	SAUR-like auxin-responsive protein family, putative (AHRD V3.3 *** A0A061E5G9_THECC)	AT1G29500	SAUR-like auxin-responsive protein family	shared
Solyc11g011680.1	SAUR-like auxin-responsive protein family (AHRD V3.3 *** AT5G18030.1)	AT5G18030	SAUR-like auxin-responsive protein family	shared
Solyc11g011690.1	SAUR-like auxin-responsive protein family, putative (AHRD V3.3 *** A0A061E5G9_THECC)	AT1G29500	SAUR-like auxin-responsive protein family	shared
Solyc11g011700.1	SAUR-like auxin-responsive protein family (AHRD V3.3 *** AT2G21210.2)	AT5G18030	SAUR-like auxin-responsive protein family	shared
Solyc11g011710.1	Small auxin up-regulated RNA95	AT1G29500	SAUR-like auxin-responsive protein family	shared
Solyc11g011720.1	SAUR-like auxin-responsive protein family (AHRD V3.3 *** AT5G18030.1)	AT5G18030	SAUR-like auxin-responsive protein family	shared
Solyc02g076910.3	Cysteine protease (AHRD V3.3 *** E7D4U5_TOBAC)	AT5G45890	senescence-associated gene 12	shared
Solyc06g009140.3	Late embryogenesis abundant protein (AHRD V3.3 *** E3W6T3_SESPO)	AT4G02380	senescence-associated gene 21	shared
Solyc04g079470.3	Serpin-like protein (AHRD V3.3 *** Q8GT65_CITPA)	AT1G47710	Serine protease inhibitor (SERPIN) family protein	shared
Solyc12g009880.1	LOW QUALITY:Serine-rich protein-related (AHRD V3.3 *** A0A061GN42_THECC)	AT5G11090	serine-rich protein-related	shared
Solyc06g068010.3	Biotin carboxyl carrier protein (AHRD V3.3 *** A0A0H5BV69_PEA)	AT3G15690	Single hybrid motif superfamily protein	shared
Solyc11g008820.2	Endoglucanase (AHRD V3.3 *** A0A0V0II53_SOLCH)	AT1G65610	Six-hairpin glycosidases superfamily protein	shared
Solyc12g056920.2	Sulfate transporter, putative (AHRD V3.3 *** B9RJF7_RICCO)	AT5G10180	slufate transporter 2;1	shared
Solyc01g010770.3	Hypersensitive-induced response protein (AHRD V3.3 *** Q6UNT3_CUCSA)	AT5G62740	SPFH/Band 7/PHB domain-containing membrane-associated protein family	shared
Solyc01g087840.3	Subtilisin-like protease (AHRD V3.3 *** O82006_SOLLC)	AT2G05920	Subtilase family protein	shared
Solyc02g071560.3	Subtilisin-like protease (AHRD V3.3 *** A0A0B0Q303_GOSAR)	AT5G45650	subtilase family protein	shared
Solyc08g079900.3	subtilisin-like protease	AT5G67360	Subtilase family protein	shared
Solyc08g079930.2	subtilisin-like protease	AT5G67360	Subtilase family protein	shared
Solyc08g079980.1	Subtilisin-like protease (AHRD V3.3 *** Q9LWA3_SOLLC)	AT5G67360	Subtilase family protein	shared
Solyc01g087800.2	LOW QUALITY:Subtilisin-like protease (AHRD V3.3 *** O82777_SOLLC)	AT5G67090	Subtilisin-like serine endopeptidase family protein	shared
Solyc01g087810.2	subtilisin-like serine protease family protein	AT5G67090	Subtilisin-like serine endopeptidase family protein	shared
Solyc02g078620.1	Dof zinc finger protein (AHRD V3.3 *** W9RD26_9ROSA)	AT5G60200	TARGET OF MONOPTEROS 6	shared
Solyc09g008030.1	TCP transcription factor 19	AT2G37000	TCP family transcription factor	shared
Solyc11g020670.1	TCP transcription factor 12	AT1G35560	TCP family transcription factor	shared
Solyc02g094290.1	TCP transcription factor 27	AT3G27010	TEOSINTE BRANCHED 1, cycloidea, PCF (TCP)-domain family protein 20	shared
Solyc03g116320.3	TCP transcription factor 16	AT3G47620	TEOSINTE BRANCHED, cycloidea and PCF (TCP) 14	shared
Solyc03g114480.3	Tetraspanin family protein (AHRD V3.3 *** A0A072V357_MEDTR)	AT2G23810	tetraspanin8	shared
Solyc01g067460.2	Glutaredoxin family protein (AHRD V3.3 *** D7MAE7_ARALL)	AT4G15700	Thioredoxin superfamily protein	shared
Solyc04g011830.1	Glutaredoxin (AHRD V3.3 *** A0A103Y7J3_CYNCS)	AT1G03020	Thioredoxin superfamily protein	shared
Solyc06g008750.1	Glutaredoxin (AHRD V3.3 *** E9NZT9_PHAVU)	AT3G62950	Thioredoxin superfamily protein	shared
Solyc06g054570.1	Glutaredoxin family protein (AHRD V3.3 *** D7LYE9_ARALL)	AT5G18600	Thioredoxin superfamily protein	shared
Solyc06g008620.1	LOW QUALITY:tolB protein-like protein (AHRD V3.3 *** AT4G01870.2)	AT4G01870	tolB protein-related	shared
Solyc02g072150.3	Trehalose-6-phosphate synthase, putative (AHRD V3.3 *** B9S8D6_RICCO)	AT1G06410	trehalose-phosphatase/synthase 7	shared
Solyc01g095610.3	protein trichome birefringence-like 25	AT1G01430	TRICHOME BIREFRINGENCE-LIKE 25	shared
Solyc10g009590.3	Trichome birefringence-like protein (AHRD V3.3 *-* A0A072TUJ8_MEDTR)	AT1G01430	TRICHOME BIREFRINGENCE-LIKE 25	shared
Solyc07g062220.3	Trichome birefringence-like protein (AHRD V3.3 *** G7IKB9_MEDTR)	AT3G14850	TRICHOME BIREFRINGENCE-LIKE 41	shared
Solyc09g065770.1	LOW QUALITY:Ubiquitin-conjugating enzyme/RWD-like protein, putative (AHRD V3.3 *** A0A061DQB8_THECC)	AT2G38830	Ubiquitin-conjugating enzyme/RWD-like protein	shared
Solyc01g005210.3	Trehalose-phosphate synthase 6 (AHRD V3.3 *** W8Q024_CAMSI)	AT1G68020	UDP-Glycosyltransferase / trehalose-phosphatase family protein	shared
Solyc02g091370.2	Glycosyltransferase (AHRD V3.3 *** K4BCT5_SOLLC)	AT1G22400	UDP-Glycosyltransferase superfamily protein	shared
Solyc04g014990.2	Glycosyltransferase (AHRD V3.3 *** K4BNY7_SOLLC)	AT2G36770	UDP-Glycosyltransferase superfamily protein	shared
Solyc04g016190.1	Glycosyltransferase (AHRD V3.3 *** K4BQB9_SOLLC)	AT2G36770	UDP-Glycosyltransferase superfamily protein	shared
Solyc07g043150.1	Glycosyltransferase (AHRD V3.3 *** K4CEH5_SOLLC)	AT3G21760	UDP-Glycosyltransferase superfamily protein	shared
Solyc11g007500.2	Glycosyltransferase (AHRD V3.3 *** M1BPV9_SOLTU)	AT5G49690	UDP-Glycosyltransferase superfamily protein	shared
Solyc12g096870.1	Glycosyltransferase (AHRD V3.3 *** Q0PI14_VITLA)	AT4G15480	UDP-Glycosyltransferase superfamily protein	shared
Solyc02g031990.1	LOW QUALITY:VQ motif-containing protein, putative (AHRD V3.3 *-* A0A061DVP3_THECC)	AT4G39720	VQ motif-containing protein	shared
Solyc02g068470.1	LOW QUALITY:VQ motif-containing protein, putative (AHRD V3.3 *-* A0A061DVP3_THECC)	AT4G39720	VQ motif-containing protein	shared
Solyc07g056600.1	VQ motif-containing protein (AHRD V3.3 *** AT1G78410.2)	AT1G78410	VQ motif-containing protein	shared
Solyc09g008750.1	VQ motif-containing protein, putative (AHRD V3.3 *** A0A061DH87_THECC)	AT4G37710	VQ motif-containing protein	shared
Solyc09g008760.1	VQ motif-containing protein (AHRD V3.3 *-* AT4G37710.2)	AT4G37710	VQ motif-containing protein	shared
Solyc12g042730.1	LOW QUALITY:VQ motif-containing protein (AHRD V3.3 *** AT1G80450.1)	AT1G80450	VQ motif-containing protein	shared
Solyc09g014720.2	Kinase, putative (AHRD V3.3 *** B9RE26_RICCO)	AT1G21270	wall-associated kinase 2	shared
Solyc02g079240.1	LOW QUALITY:Wound-responsive family protein (AHRD V3.3 --* AT4G10265.1)	AT4G05070	Wound-responsive family protein	shared
Solyc07g054730.1	LOW QUALITY:Wound-responsive family protein, putative (AHRD V3.3 *** A0A061E4N2_THECC)	AT4G28240	Wound-responsive family protein	shared
Solyc07g054780.1	LOW QUALITY:Wound-responsive family protein (AHRD V3.3 *** AT4G10265.1)	AT4G10265	Wound-responsive family protein	shared
Solyc09g092520.3	xyloglucan endotransglycosylase	AT3G23730	xyloglucan endotransglucosylase/hydrolase 16	shared
Solyc05g046290.3	Xyloglucan endotransglucosylase/hydrolase (AHRD V3.3 *** K4C0W2_SOLLC)	AT4G25810	xyloglucan endotransglycosylase 6	shared
Solyc05g018050.1	LOW QUALITY:RING/U-box superfamily protein (AHRD V3.3 *-* AT3G60080.1)	AT5G59550	zinc finger (C3HC4-type RING finger) family protein	shared
Solyc08g065940.3	Zinc finger CCCH domain-containing protein (AHRD V3.3 *** R4QQJ8_CUCME)	AT4G29190	Zinc finger C-x8-C-x5-C-x3-H type family protein	shared
Solyc03g113890.1	LOW QUALITY:Zinc finger family protein (AHRD V3.3 *-* B9HJ48_POPTR)	AT1G67030	zinc finger protein 6	shared
Solyc00g217960.1	LOW QUALITY:RING/U-box superfamily protein (AHRD V3.3 *-* AT1G49200.1)	AT3G14320	Zinc finger, C3HC4 type (RING finger) family protein	shared
Solyc01g109900.3	Aspartate carbamoyltransferase (AHRD V3.3 *** A0A0B0NCD8_GOSAR)	AT2G16385	NA	uniq in slsdg34
Solyc02g065430.1	LOW QUALITY:DUF4228 domain protein (AHRD V3.3 *** G7K9H8_MEDTR)	AT2G23690	NA	uniq in slsdg34
Solyc04g082280.3	At1g76250 (AHRD V3.3 *** Q8GX25_ARATH)	AT1G76250	NA	uniq in slsdg34
Solyc05g012030.1	LOW QUALITY:Protein BIG GRAIN 1-like E (AHRD V3.3 *** BIG1E_ARATH)	AT1G69160	NA	uniq in slsdg34
Solyc07g006420.1	LOW QUALITY:transmembrane protein (AHRD V3.3 *** AT2G18680.1)	AT2G18680	NA	uniq in slsdg34
Solyc12g010940.1	LOW QUALITY:DUF1685 family protein (AHRD V3.3 *** A0A072V475_MEDTR)	AT2G42760	NA	uniq in slsdg34
Solyc06g067870.3	2-oxoglutarate-dependent dioxygenase (AHRD V3.3 *** H9AY17_SALMI)	AT1G52800	2-oxoglutarate (2OG) and Fe(II)-dependent oxygenase superfamily protein	uniq in slsdg34
Solyc09g089790.3	2-oxoglutarate (2OG) and Fe(II)-dependent oxygenase superfamily protein (AHRD V3.3 *** AT1G06620.1)	AT1G06620	2-oxoglutarate (2OG) and Fe(II)-dependent oxygenase superfamily protein	uniq in slsdg34
Solyc03g044810.2	Methyl jasmonate esterase (AHRD V3.3 *** Q56SE1_SOLTU)	AT2G23600	acetone-cyanohydrin lyase	uniq in slsdg34
Solyc09g082240.3	Acetyltransferase (GNAT) domain protein (AHRD V3.3 *** A0A072U473_MEDTR)	AT2G32030	Acyl-CoA N-acyltransferases (NAT) superfamily protein	uniq in slsdg34
Solyc11g012250.1	MBOAT (Membrane bound O-acyl transferase) family protein, putative (AHRD V3.3 *** Q2HT39_MEDTR)	AT3G51970	acyl-CoA sterol acyl transferase 1	uniq in slsdg34
Solyc11g007030.2	alpha/beta-Hydrolases superfamily protein (AHRD V3.3 *** AT2G36290.1)	AT2G36290	alpha/beta-Hydrolases superfamily protein	uniq in slsdg34
Solyc08g062360.3	Ankyrin repeat family protein (AHRD V3.3 *** F8WLA0_CITUN)	AT5G51160	Ankyrin repeat family protein	uniq in slsdg34
Solyc07g008980.3	defensin-like protein (AHRD V3.3 *** AT1G19610.1)	AT1G19610	Arabidopsis defensin-like protein	uniq in slsdg34
Solyc02g083090.1	LOW QUALITY:DUF241 domain protein (AHRD V3.3 *** G7LA83_MEDTR)	AT4G35690	Arabidopsis protein of unknown function (DUF241)	uniq in slsdg34
Solyc11g006030.1	U-box domain-containing family protein (AHRD V3.3 *** U5FLQ4_POPTR)	AT5G37490	ARM repeat superfamily protein	uniq in slsdg34
Solyc07g048070.3	Auxin induced-like protein (AHRD V3.3 *** A0A0K9NX81_ZOSMR)	AT5G47530	Auxin-responsive family protein	uniq in slsdg34
Solyc12g008930.2	Basic helix loop helix (BHLH) DNA-binding family protein (AHRD V3.3 *** G7IIK9_MEDTR)	AT5G56960	basic helix-loop-helix (bHLH) DNA-binding family protein	uniq in slsdg34
Solyc02g079810.2	bHLH transcription factor 080	AT4G21330	basic helix-loop-helix (bHLH) DNA-binding superfamily protein	uniq in slsdg34
Solyc03g095980.3	bHLH transcription factor 021	AT2G40200	basic helix-loop-helix (bHLH) DNA-binding superfamily protein	uniq in slsdg34
Solyc05g014590.3	basic helix-loop-helix (bHLH) DNA-binding superfamily protein (AHRD V3.3 *** AT5G57150.1)	AT5G57150	basic helix-loop-helix (bHLH) DNA-binding superfamily protein	uniq in slsdg34
Solyc06g062460.3	bHLH transcription factor136	AT3G21330	basic helix-loop-helix (bHLH) DNA-binding superfamily protein	uniq in slsdg34
Solyc09g007020.1	pathogenesis-related protein	AT2G14580	basic pathogenesis-related protein 1	uniq in slsdg34
Solyc01g109390.3	Protease inhibitor/seed storage/lipid transfer protein family protein (AHRD V3.3 *** D7MM18_ARALL)	AT5G48490	Bifunctional inhibitor/lipid-transfer protein/seed storage 2S albumin superfamily protein	uniq in slsdg34
Solyc12g009700.2	Calcium-dependent lipid-binding (CaLB domain) family protein (AHRD V3.3 *-* AT1G05500.1)	AT1G05500	Calcium-dependent lipid-binding (CaLB domain) family protein	uniq in slsdg34
Solyc07g040710.3	Calmodulin binding protein, putative (AHRD V3.3 *** B9RK85_RICCO)	AT4G33050	calmodulin-binding family protein	uniq in slsdg34
Solyc08g062930.2	Calmodulin binding protein, putative (AHRD V3.3 *** B9RQR7_RICCO)	AT5G57010	calmodulin-binding family protein	uniq in slsdg34
Solyc03g113950.3	Calmodulin-binding protein (AHRD V3.3 *-* AT5G57580.1)	AT5G57580	Calmodulin-binding protein	uniq in slsdg34
Solyc10g083290.4	symbol=Lin6	AT3G52600	cell wall invertase 2	uniq in slsdg34
Solyc03g120260.3	Coatomer beta subunit, putative (AHRD V3.3 *-* B9SQC0_RICCO)	AT3G15980	Coatomer, beta' subunit	uniq in slsdg34
Solyc01g108350.3	Plastocyanin-like domain protein (AHRD V3.3 *** G7JMH4_MEDTR)	AT2G15780	Cupredoxin superfamily protein	uniq in slsdg34
Solyc04g054660.2	LOW QUALITY:Ascorbate oxidase (AHRD V3.3 *-* Q4VDN6_SOLLC)	AT4G39830	Cupredoxin superfamily protein	uniq in slsdg34
Solyc09g011270.3	Cysteine/Histidine-rich C1 domain family protein (AHRD V3.3 *** AT2G37820.1)	AT2G37820	Cysteine/Histidine-rich C1 domain family protein	uniq in slsdg34
Solyc03g033750.1	P-loop containing nucleoside triphosphate hydrolases superfamily protein (AHRD V3.3 *-* AT3G50940.1)	AT3G50930	cytochrome BC1 synthesis	uniq in slsdg34
Solyc11g030730.2	Cytochrome P450 (AHRD V3.3 *** Q0PNH1_CAPCH)	AT5G07990	Cytochrome P450 superfamily protein	uniq in slsdg34
Solyc04g083140.2	Cytochrome P450 (AHRD V3.3 *** Q9AVQ2_SOLTU)	AT3G26310	cytochrome P450, family 71, subfamily B, polypeptide 35	uniq in slsdg34
Solyc09g059240.3	Cytochrome P450, putative (AHRD V3.3 *** B9SYM4_RICCO)	AT4G31940	cytochrome P450, family 82, subfamily C, polypeptide 4	uniq in slsdg34
Solyc02g062390.3	Dehydrin (AHRD V3.3 *** E7BXD9_JATCU)	AT3G50980	dehydrin xero 1	uniq in slsdg34
Solyc07g008630.1	Leucine-rich repeat receptor-like protein kinase family protein (AHRD V3.3 *** AT4G08850.2)	AT2G34930	disease resistance family protein / LRR family protein	uniq in slsdg34
Solyc05g051200.1	ethylene-responsive factor 1	AT3G23240	ethylene response factor 1	uniq in slsdg34
Solyc09g066360.1	Ethylene Response Factor C.3	AT3G23240	ethylene response factor 1	uniq in slsdg34
Solyc05g016310.1	LOW QUALITY:Eukaryotic aspartyl protease family protein (AHRD V3.3 *** AT3G59080.1)	AT3G59080	Eukaryotic aspartyl protease family protein	uniq in slsdg34
Solyc08g074860.1	Eukaryotic translation initiation factor 3 subunit G (AHRD V3.3 *-* M1CY77_SOLTU)	AT3G11400	eukaryotic translation initiation factor 3G1	uniq in slsdg34
Solyc09g005830.1	LOW QUALITY:ACI49	AT3G09520	exocyst subunit exo70 family protein H4	uniq in slsdg34
Solyc02g070090.1	FAD-binding Berberine family protein (AHRD V3.3 *** A0A061G7Z5_THECC)	AT1G30700	FAD-binding Berberine family protein	uniq in slsdg34
Solyc02g087770.3	Aldose 1-epimerase (AHRD V3.3 *** K4BBT3_SOLLC)	AT5G15140	Galactose mutarotase-like superfamily protein	uniq in slsdg34
Solyc02g087800.3	Aldose 1-epimerase (AHRD V3.3 *** K4BBT6_SOLLC)	AT5G15140	Galactose mutarotase-like superfamily protein	uniq in slsdg34
Solyc07g009410.3	Kelch repeat-containing F-box family protein (AHRD V3.3 *** B9GJS6_POPTR)	AT3G27150	Galactose oxidase/kelch repeat superfamily protein	uniq in slsdg34
Solyc12g089300.2	Gibberellin-regulated protein 2 (AHRD V3.3 *-* B6TLZ8_MAIZE)	AT1G75750	GAST1 protein homolog 1	uniq in slsdg34
Solyc01g102380.4	germin	AT1G09560	germin-like protein 5	uniq in slsdg34
Solyc01g058250.2	Gibberellin 3-beta-hydroxylase 2 (AHRD V3.3 *** Q941N2_SOLTU)	AT1G15550	gibberellin 3-oxidase 1	uniq in slsdg34
Solyc04g025530.3	glutamate decarboxylase (AHRD V3.3 *** AT5G17330.1)	AT2G02010	glutamate decarboxylase 4	uniq in slsdg34
Solyc07g056510.3	Glutathione S-transferase (AHRD V1 **** D3Y4H6_9ROSI)	AT1G17180	glutathione S-transferase TAU 25	uniq in slsdg34
Solyc01g081250.3	Glutathione s-transferase, putative (AHRD V3.3 *** B9SPC9_RICCO)	AT3G09270	glutathione S-transferase TAU 8	uniq in slsdg34
Solyc09g011490.3	Glutathione S-transferase-like protein (AHRD V3.3 *** K7VK72_SOLTU)	AT3G09270	glutathione S-transferase TAU 8	uniq in slsdg34
Solyc07g005100.3	Chitinase/lysozyme (AHRD V3.3 *** Q43591_TOBAC)	AT4G19810	Glycosyl hydrolase family protein with chitinase insertion domain	uniq in slsdg34
Solyc01g008620.3	Beta-1,3-glucanase (AHRD V3.3 *** Q9SYX6_TOBAC)	AT4G16260	Glycosyl hydrolase superfamily protein	uniq in slsdg34
Solyc12g013665.1	Mannan endo-1,4-beta-mannosidase 1 (AHRD V3.3 *** MAN1_SOLLC)	AT5G66460	Glycosyl hydrolase superfamily protein	uniq in slsdg34
Solyc04g016000.3	SolycHsfB3a	AT2G41690	heat shock transcription factor B3	uniq in slsdg34
Solyc04g072700.3	Heavy metal transport/detoxification superfamily protein (AHRD V3.3 *** AT4G08570.1)	AT4G08570	Heavy metal transport/detoxification superfamily protein	uniq in slsdg34
Solyc05g054860.1	Kinase, putative (AHRD V3.3 *** B9SGH1_RICCO)	AT3G46290	hercules receptor kinase 1	uniq in slsdg34
Solyc03g034150.2	Homeobox-leucine zipper family protein (AHRD V3.3 *** B9MXR7_POPTR)	AT2G18550	homeobox protein 21	uniq in slsdg34
Solyc06g035940.3	Homeobox leucine zipper protein (AHRD V3.3 *** A0A072TNH2_MEDTR)	AT4G00730	Homeobox-leucine zipper family protein / lipid-binding START domain-containing protein	uniq in slsdg34
Solyc12g010410.2	Homeobox protein knotted-1, putative (AHRD V3.3 *** B9RNZ6_RICCO)	AT5G11060	KNOTTED1-like homeobox gene 4	uniq in slsdg34
Solyc08g008150.1	LOW QUALITY:Late embryogenesis abundant hydroxyproline-rich glycoprotein (AHRD V3.3 *-* O82354_ARATH)	AT2G46150	Late embryogenesis abundant (LEA) hydroxyproline-rich glycoprotein family	uniq in slsdg34
Solyc01g106500.3	Leucine-rich receptor-like protein kinase family protein (AHRD V3.3 *** AT1G09970.1)	AT1G09970	Leucine-rich receptor-like protein kinase family protein	uniq in slsdg34
Solyc02g031790.2	Receptor-like protein kinase (AHRD V3.3 *** RPK1_IPONI)	AT5G46330	Leucine-rich receptor-like protein kinase family protein	uniq in slsdg34
Solyc04g076990.3	Receptor protein kinase CLAVATA1, putative (AHRD V3.3 *** B9R6R4_RICCO)	AT1G09970	Leucine-rich receptor-like protein kinase family protein	uniq in slsdg34
Solyc02g072470.3	LRR receptor-like kinase (AHRD V3.3 *** A0A072V4N4_MEDTR)	AT4G20140	Leucine-rich repeat transmembrane protein kinase	uniq in slsdg34
Solyc02g072480.3	LRR receptor-like kinase (AHRD V3.3 *** A0A072V4N4_MEDTR)	AT4G20140	Leucine-rich repeat transmembrane protein kinase	uniq in slsdg34
Solyc06g005090.3	LOB domain-containing protein, putative (AHRD V3.3 *** B9SK21_RICCO)	AT1G07900	LOB domain-containing protein 1	uniq in slsdg34
Solyc02g085910.3	LOB domain-containing protein (AHRD V3.3 *** A0A0K9PUI8_ZOSMR)	AT3G02550	LOB domain-containing protein 41	uniq in slsdg34
Solyc11g007140.2	Hippocampus abundant transcript-like protein 1 (AHRD V3.3 *-* W9QGN7_9ROSA)	AT2G16980	Major facilitator superfamily protein	uniq in slsdg34
Solyc05g009040.3	Receptor-like protein kinase (AHRD V3.3 *** D3G6F0_CAPAN)	AT5G39020	Malectin/receptor-like protein kinase family protein	uniq in slsdg34
Solyc03g025210.3	Mate efflux family protein (AHRD V1 **-- D7M5Q2_ARALY)	AT4G00350	MATE efflux family protein	uniq in slsdg34
Solyc04g064590.2	MAP kinase kinase kinase 33	AT1G53570	mitogen-activated protein kinase kinase kinase 3	uniq in slsdg34
Solyc09g090970.3	Major allergen Pru ar 1 (AHRD V3.3 *** A0A0B2QY84_GLYSO)	AT1G70850	MLP-like protein 34	uniq in slsdg34
Solyc03g093930.3	MYB family protein (AHRD V3.3 *-* A0A067JDM6_JATCU)	AT2G31180	myb domain protein 14	uniq in slsdg34
Solyc05g053150.2	R2R3MYB transcription factor 71	AT3G24310	myb domain protein 305	uniq in slsdg34
Solyc10g076460.2	MYB-like transcription factor family protein (AHRD V3.3 *** G7KSC8_MEDTR)	AT2G38300	myb-like HTH transcriptional regulator family protein	uniq in slsdg34
Solyc00g023590.2	LOW QUALITY:Pectin lyase-like superfamily protein (AHRD V3.3 --* AT1G78400.1)	NA	NA	uniq in slsdg34
Solyc01g066790.1	LOW QUALITY:Diacylglycerol O-acyltransferase 2 (AHRD V3.3 --* DGAT2_ARATH)	NA	NA	uniq in slsdg34
Solyc01g106905.1	Calcineurin-like metallo-phosphoesterase superfamily protein (AHRD V3.3 --* AT3G09970.2)	NA	NA	uniq in slsdg34
Solyc02g043950.1	LOW QUALITY:BnaC09g16530D protein (AHRD V3.3 --* A0A078E240_BRANA)	NA	NA	uniq in slsdg34
Solyc02g078650.3	Polyphenol oxidase (AHRD V3.3 *** A0A118JXA6_CYNCS)	NA	NA	uniq in slsdg34
Solyc03g096430.1	LOW QUALITY:CLIP-associating protein 1 (AHRD V3.3 --* A0A0B2NZ56_GLYSO)	NA	NA	uniq in slsdg34
Solyc03g121340.1	LOW QUALITY:isopentenyltransferase 5 (AHRD V3.3 --* AT5G19040.3)	NA	NA	uniq in slsdg34
Solyc04g071085.1	Hydroxyproline-rich glycoprotein (AHRD V3.3 *** Q8H9E0_SOLTU)	NA	NA	uniq in slsdg34
Solyc05g015590.1	LOW QUALITY:TRAM, LAG1 and CLN8 (TLC) lipid-sensing domain containing protein (AHRD V3.3 --* AT1G31300.3)	NA	NA	uniq in slsdg34
Solyc07g009230.3	Defensin-like protein (AHRD V3.3 -** G7LB12_MEDTR)	NA	NA	uniq in slsdg34
Solyc08g066290.3	low-molecular-weight cysteine-rich 2 (AHRD V3.3 --* AT4G10595.1)	NA	NA	uniq in slsdg34
Solyc08g074682.1	polyphenol oxidase precursor	NA	NA	uniq in slsdg34
Solyc08g075560.1	Unknown protein (AHRD V3.3 )	NA	NA	uniq in slsdg34
Solyc09g062960.2	LOW QUALITY:Chaperone DnaJ-domain superfamily protein (AHRD V3.3 --* AT5G37380.9)	NA	NA	uniq in slsdg34
Solyc10g018903.1	SPT4 homolog 2 (AHRD V3.3 --* AT5G63670.1)	NA	NA	uniq in slsdg34
Solyc10g050465.1	zinc ion binding/nucleic acid binding/hydrolase (AHRD V3.3 --* AT1G48360.4)	NA	NA	uniq in slsdg34
Solyc12g005550.2	Gamma-tubulin complex component (AHRD V3.3 --* A0A0K9RPK1_SPIOL)	NA	NA	uniq in slsdg34
Solyc12g011090.2	cellulose synthase, putative (DUF1644) (AHRD V3.3 --* AT3G24740.6)	NA	NA	uniq in slsdg34
Solyc12g038843.1	electron transfer flavoprotein beta (AHRD V3.3 --* AT5G43430.2)	NA	NA	uniq in slsdg34
Solyc12g042800.2	dsRNA-binding domain-like superfamily protein (AHRD V3.3 --* AT1G09700.1)	NA	NA	uniq in slsdg34
Solyc12g042965.1	Tetratricopeptide repeat (TPR)-like superfamily protein (AHRD V3.3 --* AT4G10840.2)	NA	NA	uniq in slsdg34
Solyc12g077380.1	LOW QUALITY:ABC-2 type transporter family protein (AHRD V3.3 --* AT2G37360.1)	NA	NA	uniq in slsdg34
Solyc12g098753.1	Pollen protein Ole E I-like protein (AHRD V3.3 *-* A0A072VSY6_MEDTR)	NA	NA	uniq in slsdg34
Solyc06g069710.3	NAC domain protein, (AHRD V3.3 *** A0A061FWI7_THECC)	AT5G61430	NAC domain containing protein 100	uniq in slsdg34
Solyc03g095970.3	NAD(P)-binding Rossmann-fold superfamily protein (AHRD V3.3 *** AT2G47140.1),Pfam:PF13561	AT2G47140	NAD(P)-binding Rossmann-fold superfamily protein	uniq in slsdg34
Solyc00g231780.2	NAD(P)H-quinone oxidoreductase subunit I, chloroplastic (AHRD V3.3 *-* NDHI_NANDO)	ATCG01090	NADPH dehydrogenases	uniq in slsdg34
Solyc04g011990.2	Disease resistance protein (NBS-LRR class) family (AHRD V3.3 *-* AT5G38350.1)	AT3G46530	NB-ARC domain-containing disease resistance protein	uniq in slsdg34
Solyc11g069020.2	Disease resistance protein (AHRD V3.3 *** A0A118JXS4_CYNCS)	AT3G46530	NB-ARC domain-containing disease resistance protein	uniq in slsdg34
Solyc09g074760.1	Nuclear transcription factor Y protein (AHRD V3.3 *** A0A072TR10_MEDTR)	AT2G47810	nuclear factor Y, subunit B5	uniq in slsdg34
Solyc07g045430.3	Nudix hydrolase (AHRD V3.3 *** A0A061GGI6_THECC)	AT5G47650	nudix hydrolase homolog 2	uniq in slsdg34
Solyc02g077530.2	O-methyltransferase, putative (AHRD V3.3 *** B9S932_RICCO)	AT4G35160	O-methyltransferase family protein	uniq in slsdg34
Solyc08g080620.1	PR-5x	AT4G11650	osmotin 34	uniq in slsdg34
Solyc12g056360.1	Thaumatin-like protein (AHRD V3.3 *** TLP_ACTDE)	AT4G11650	osmotin 34	uniq in slsdg34
Solyc01g097240.3	Pathogenesis-related protein PR-4 (AHRD V3.3 *** PR4_PRUPE)	AT3G04720	pathogenesis-related 4	uniq in slsdg34
Solyc04g012080.2	Pentatricopeptide repeat-containing protein (AHRD V3.3 *-* A0A118K085_CYNCS)	AT4G14050	Pentatricopeptide repeat (PPR) superfamily protein	uniq in slsdg34
Solyc02g063250.3	Peptide methionine sulfoxide reductase MsrA (AHRD V3.3 *** W9S0U3_9ROSA)	AT4G25130	peptide met sulfoxide reductase 4	uniq in slsdg34
Solyc02g087070.3	alpha-DOX1	AT3G01420	Peroxidase superfamily protein	uniq in slsdg34
Solyc03g006700.3	Peroxidase (AHRD V3.3 *** K4BE93_SOLLC)	AT5G05340	Peroxidase superfamily protein	uniq in slsdg34
Solyc03g080150.3	Peroxidase (AHRD V3.3 *** K4BHZ1_SOLLC)	AT1G05260	Peroxidase superfamily protein	uniq in slsdg34
Solyc08g069040.3	Peroxidase (AHRD V3.3 *** K4CMC4_SOLLC)	AT4G37530	Peroxidase superfamily protein	uniq in slsdg34
Solyc08g065370.1	LOW QUALITY:Photosystem II D2 protein (AHRD V3.3 *-* PSBD_CRYJA)	ATCG00270	photosystem II reaction center protein D	uniq in slsdg34
Solyc02g092110.3	Phytosulfokines 3 family protein (AHRD V3.3 *** B9IBM1_POPTR)	AT3G49780	phytosulfokine 4 precursor	uniq in slsdg34
Solyc12g096400.2	Calmodulin-binding family protein (AHRD V3.3 *** B9NA01_POPTR)	AT5G39380	Plant calmodulin-binding protein-related	uniq in slsdg34
Solyc09g011870.2	Arogenate dehydrogenase 2 (AHRD V3.3 *** F1BPV6_SOLPN)	AT1G15710	prephenate dehydrogenase family protein	uniq in slsdg34
Solyc12g036320.2	Kinase superfamily protein (AHRD V3.3 *** A0A061G213_THECC)	AT1G18390	Protein kinase superfamily protein	uniq in slsdg34
Solyc07g056610.2	carboxyl-terminal peptidase (DUF239) (AHRD V3.3 *** AT2G44210.1)	AT4G15050	Protein of Unknown Function (DUF239)	uniq in slsdg34
Solyc08g068640.4	Decarboxylase family protein IPR002129 Pyridoxal phosphate-dependent decarboxylase	AT1G43710	Pyridoxal phosphate (PLP)-dependent transferases superfamily protein	uniq in slsdg34
Solyc02g077240.3	Pyruvate decarboxylase (AHRD V3.3 *** Q1I1D9_CITSI)	AT5G54960	pyruvate decarboxylase-2	uniq in slsdg34
Solyc12g089190.1	Myb family transcription factor family protein (AHRD V3.3 *** B9H0R6_POPTR)	AT4G39250	RAD-like 1	uniq in slsdg34
Solyc12g099980.2	Leucine-rich repeat receptor-like protein kinase family protein (AHRD V3.3 *** AT4G08850.1)	AT5G25910	receptor like protein 52	uniq in slsdg34
Solyc12g040740.2	Leucine-rich repeat receptor-like protein kinase family protein (AHRD V3.3 *-* AT4G08850.1)	AT5G27060	receptor like protein 53	uniq in slsdg34
Solyc12g009730.2	Leucine-rich-repeat receptor-like protein (AHRD V3.3 *** A0A0D4WVW2_GOSBA)	AT1G45616	receptor like protein 6	uniq in slsdg34
Solyc08g077740.1	Leucine-rich repeat receptor-like protein kinase family protein (AHRD V3.3 *** AT2G33170.2)	AT1G47890	receptor like protein 7	uniq in slsdg34
Solyc03g123680.1	RING/U-box superfamily protein (AHRD V3.3 *** AT1G72310.1)	AT1G72310	RING/U-box superfamily protein	uniq in slsdg34
Solyc10g008080.2	RING/U-box superfamily protein (AHRD V3.3 *** AT2G42350.1)	AT2G42350	RING/U-box superfamily protein	uniq in slsdg34
Solyc01g005230.3	S-adenosyl-L-methionine-dependent methyltransferase superfamily protein (AHRD V3.3 *** AT5G37990.1)	AT1G68040	S-adenosyl-L-methionine-dependent methyltransferases superfamily protein	uniq in slsdg34
Solyc07g055630.3	Serine/threonine-protein kinase (AHRD V3.3 *-* M1BGA2_SOLTU)	AT4G32300	S-domain-2 5	uniq in slsdg34
Solyc02g030380.2	Serine/threonine-protein kinase (AHRD V3.3 *-* K4B581_SOLLC)	AT4G27290	S-locus lectin protein kinase family protein	uniq in slsdg34
Solyc07g063710.2	Serine/threonine-protein kinase (AHRD V3.3 *** M1CC72_SOLTU)	AT4G27290	S-locus lectin protein kinase family protein	uniq in slsdg34
Solyc07g063730.2	Serine/threonine-protein kinase (AHRD V3.3 *** M1CC72_SOLTU)	AT4G27290	S-locus lectin protein kinase family protein	uniq in slsdg34
Solyc10g006710.3	Serine/threonine-protein kinase (AHRD V3.3 *** U5GTQ6_POPTR)	AT4G27290	S-locus lectin protein kinase family protein	uniq in slsdg34
Solyc04g079460.1	Serpin-like protein (AHRD V3.3 *-* Q8GT65_CITPA)	AT1G47710	Serine protease inhibitor (SERPIN) family protein	uniq in slsdg34
Solyc03g063770.2	Ribosomal protein S3 (AHRD V3.3 *** I3NTU9_9ASTE)	ATMG00090	structural constituent of ribosome;protein binding	uniq in slsdg34
Solyc08g079860.2	P69C protein	AT1G04110	Subtilase family protein	uniq in slsdg34
Solyc04g007200.3	methylketone synthase IIb	AT1G68260	Thioesterase superfamily protein	uniq in slsdg34
Solyc02g064800.3	Transducin/WD-like repeat-protein (AHRD V3.3 *** A0A072W178_MEDTR)	AT4G34280	transducin family protein / WD-40 repeat family protein	uniq in slsdg34
Solyc03g013440.3	Amino acid transporter, putative (AHRD V3.3 *** B9T0U1_RICCO)	AT5G15240	Transmembrane amino acid transporter family protein	uniq in slsdg34
Solyc01g107780.3	Glycosyltransferase (AHRD V3.3 *** K4B2Z4_SOLLC)	AT4G34131	UDP-glucosyl transferase 73B3	uniq in slsdg34
Solyc09g098080.3	Glycosyltransferase (AHRD V3.3 *** K4CWX9_SOLLC)	AT3G21760	UDP-Glycosyltransferase superfamily protein	uniq in slsdg34
Solyc03g098090.2	CASP-like protein (AHRD V3.3 *** K4BJM4_SOLLC)	AT2G39530	Uncharacterised protein family (UPF0497)	uniq in slsdg34
Solyc07g043250.1	LOW QUALITY:VQ motif-containing protein, putative (AHRD V3.3 *-* A0A061DVP3_THECC)	AT4G39720	VQ motif-containing protein	uniq in slsdg34
Solyc05g053380.3	WRKY transcription factor 48	AT2G47260	WRKY DNA-binding protein 23	uniq in slsdg34
Solyc03g093120.4	xyloglucan endotransglucosylase-hydrolase	AT4G25810	xyloglucan endotransglycosylase 6	uniq in slsdg34
Solyc03g093130.3	xyloglucan endotransglucosylase-hydrolase 3	AT4G25810	xyloglucan endotransglycosylase 6	uniq in slsdg34
Solyc03g096260.2	Protein yippee-like (AHRD V3.3 *** K4BJ48_SOLLC)	AT2G40110	Yippee family putative zinc-binding protein	uniq in slsdg34
B. down-regulated genes in slsdg34 vs WT
Gene ID	ITAG3.2 annotation	Arabidopsis homolog	TAIR10 annotation	shared with slsdg33
Solyc01g079460.2	LOW QUALITY:BnaC09g16130D protein (AHRD V3.3 *** A0A078E278_BRANA)	AT1G56423	NA	shared
Solyc02g090260.2	Golgin candidate 6 isoform 2 (AHRD V3.3 *** A0A061DMU6_THECC)	AT3G50430	NA	shared
Solyc02g093720.3	TPX2 (Targeting protein for Xklp2) family protein, putative (AHRD V3.3 *** A0A072U7R9_MEDTR)	AT3G27350	NA	shared
Solyc02g093890.1	Emb|CAB62340.1 (AHRD V3.3 *** Q9FKS6_ARATH)	AT3G27250	NA	shared
Solyc03g006040.3	Transcription factor bHLH35-like protein (AHRD V3.3 *** A0A0B0MJP3_GOSAR)	AT1G29270	NA	shared
Solyc03g118060.3	NADH-ubiquinone reductase complex 1 MLRQ subunit (AHRD V3.3 *** G7K3Q0_MEDTR)	AT5G07330	NA	shared
Solyc04g007990.1	LOW QUALITY:ATP synthase subunit beta, chloroplastic (AHRD V3.3 --* ATPB_CALFL)	AT1G67920	NA	shared
Solyc04g076010.3	RING/FYVE/PHD zinc finger superfamily protein (AHRD V3.3 --* AT1G43770.3)	AT1G02070	NA	shared
Solyc04g076340.3	Ribosomal RNA small subunit methyltransferase A (AHRD V3.3 *** A0A0B0NTG7_GOSAR)	AT4G38060	NA	shared
Solyc05g015890.3	transmembrane protein (AHRD V3.3 *** AT1G27990.1)	AT1G27990	NA	shared
Solyc06g034310.3	Myb/SANT-like DNA-binding domain protein (AHRD V3.3 *** G7LIE6_MEDTR)	AT4G02550	NA	shared
Solyc06g060570.3	Dihydrofolate reductase (AHRD V3.3 *** A0A0B0NHA3_GOSAR)	AT4G24380	NA	shared
Solyc06g066700.1	serine-rich protein-like protein (AHRD V3.3 --* AT3G13227.1)	AT1G52342	NA	shared
Solyc06g068620.3	Negative regulator of sporulation MDS3 (AHRD V3.3 *-* A0A0B0N6H6_GOSAR)	AT5G43150	NA	shared
Solyc06g069150.1	LOW QUALITY:Zinc finger BED domain-containing protein DAYSLEEPER (AHRD V3.3 --* DSLE_ARATH)	AT1G13360	NA	shared
Solyc06g074190.3	Plant/F24K9-26 protein (AHRD V3.3 *** A0A072UED0_MEDTR)	AT3G11590	NA	shared
Solyc07g039195.1	Dystrophin-1 (AHRD V3.3 *-* A0A0B0NKV5_GOSAR)	AT5G56850	NA	shared
Solyc07g054060.3	Phospho-N-acetylmuramoyl-pentapeptide-transferase, putative (AHRD V3.3 *-* A0A061EAV9_THECC)	AT5G42110	NA	shared
Solyc08g016415.1	kinesin-like calmodulin-binding protein (ZWICHEL) (AHRD V3.3 --* AT5G65930.2)	AT2G38465	NA	shared
Solyc09g008530.2	F-box and Leucine Rich Repeat domains containing protein, putative isoform 1 (AHRD V3.3 *** A0A061ETN1_THECC)	AT1G22060	NA	shared
Solyc09g008660.3	LOW QUALITY:Protein CHUP1, chloroplastic (AHRD V3.3 *** A0A0B2P3P6_GLYSO)	AT2G36650	NA	shared
Solyc09g008970.1	LOW QUALITY:AT3g10020/T22K18_16 (AHRD V3.3 *** Q9SR67_ARATH)	AT3G10020	NA	shared
Solyc09g009220.3	histone-lysine N-methyltransferase SETD1B-like protein (AHRD V3.3 *-* AT5G03670.1)	AT5G03670	NA	shared
Solyc09g061730.2	Late embryogenesis abundant protein 1 (AHRD V3.3 --* LEA1_ORYSI)	AT3G24750	NA	shared
Solyc09g098115.1	Voltage-gated hydrogen channel 1 (AHRD V3.3 *** A0A151T9W1_CAJCA)	AT1G10800	NA	shared
Solyc10g048060.1	myosin XI D (AHRD V3.3 --* AT2G33240.5)	ATMG00030	NA	shared
Solyc10g050220.2	cold regulated protein 27 (AHRD V3.3 *** AT5G42900.2)	AT4G33980	NA	shared
Solyc11g005930.2	Coiled-coil domain-containing protein 18, putative isoform 2 (AHRD V3.3 *** A0A061DJK4_THECC)	AT4G33467	NA	shared
Solyc11g045150.1	myosin XI D (AHRD V3.3 --* AT2G33240.8)	ATMG00030	NA	shared
Solyc11g068390.1	LOW QUALITY:B-box type zinc finger protein with CCT domain-containing protein (AHRD V3.3 --* AT2G33500.2)	AT3G52740	NA	shared
Solyc12g097060.1	LOW QUALITY:UPF0329 protein ECU01_0100/ECU01_1510/ECU08_0030, putative isoform 2 (AHRD V3.3 *** A0A061ELC2_THECC)	AT4G13540	NA	shared
Solyc12g098880.2	TRAM, LAG1 and CLN8 (TLC) lipid-sensing domain containing protein (AHRD V3.3 --* AT1G45010.4)	AT3G17580	NA	shared
Solyc08g062340.3	Heat-shock protein, putative (AHRD V3.3 *** B9RQT7_RICCO)	AT5G12020	17.6 kDa class II heat shock protein	shared
Solyc08g062450.1	Heat-shock protein, putative (AHRD V3.3 *** B9RQT7_RICCO)	AT5G12020	17.6 kDa class II heat shock protein	shared
Solyc01g006680.3	2-oxoglutarate (2OG) and Fe(II)-dependent oxygenase superfamily protein (AHRD V3.3 *** AT3G20810.5)	AT3G20810	2-oxoglutarate (2OG) and Fe(II)-dependent oxygenase superfamily protein	shared
Solyc06g073080.3	2-oxoglutarate (2OG) and Fe(II)-dependent oxygenase superfamily protein (AHRD V3.3 *** AT5G24530.1)	AT5G24530	2-oxoglutarate (2OG) and Fe(II)-dependent oxygenase superfamily protein	shared
Solyc06g082030.3	2-oxoglutarate (2OG) and Fe(II)-dependent oxygenase superfamily protein (AHRD V3.3 *** AT5G58660.1)	AT5G58660	2-oxoglutarate (2OG) and Fe(II)-dependent oxygenase superfamily protein	shared
Solyc08g062383.1	2-oxoglutarate (2OG) and Fe(II)-dependent oxygenase superfamily protein (AHRD V3.3 *-* AT1G78550.1)	AT1G78550	2-oxoglutarate (2OG) and Fe(II)-dependent oxygenase superfamily protein	shared
Solyc11g010410.2	2-oxoglutarate (2OG) and Fe(II)-dependent oxygenase superfamily protein (AHRD V3.3 *** AT5G24530.1)	AT5G24530	2-oxoglutarate (2OG) and Fe(II)-dependent oxygenase superfamily protein	shared
Solyc11g072110.2	2-oxoglutarate (2OG) and Fe(II)-dependent oxygenase superfamily protein (AHRD V3.3 *** AT1G55290.1)	AT1G55290	2-oxoglutarate (2OG) and Fe(II)-dependent oxygenase superfamily protein	shared
Solyc11g006290.2	3-oxo-5-alpha-steroid 4-dehydrogenase family protein (AHRD V3.3 *** AT5G16010.1)	AT5G16010	3-oxo-5-alpha-steroid 4-dehydrogenase family protein	shared
Solyc11g006300.2	3-oxo-5-alpha-steroid 4-dehydrogenase family protein (AHRD V3.3 *** AT5G16010.1)	AT5G16010	3-oxo-5-alpha-steroid 4-dehydrogenase family protein	shared
Solyc03g113060.3	ABC transporter A family protein (AHRD V3.3 *** A0A072UUA7_MEDTR)	AT3G47780	ABC2 homolog 6	shared
Solyc04g005380.3	Ninja-family protein AFP1-like protein (AHRD V3.3 *** V5KZR9_SOLNI)	AT1G69260	ABI five binding protein	shared
Solyc05g012210.3	Ninja-family protein AFP1-like protein (AHRD V3.3 *** V5KZR9_SOLNI)	AT1G69260	ABI five binding protein	shared
Solyc10g050210.2	Abscisic acid responsive element-binding factor 1 family protein (AHRD V3.3 *** U5GLH1_POPTR)	AT1G45249	abscisic acid responsive elements-binding factor 2	shared
Solyc01g057430.3	Carboxyltransferase alpha Subunit (AHRD V3.3 *-* A0A0G2SJ78_SALMI)	AT2G38040	acetyl Co-enzyme a carboxylase carboxyltransferase alpha subunit	shared
Solyc05g021555.1	Alcohol dehydrogenase (AHRD V3.3 *** Q4LAW8_CAPCH)	AT1G77120	alcohol dehydrogenase 1	shared
Solyc05g021570.2	Alcohol dehydrogenase (AHRD V3.3 *-* ADH_FRAAN)	AT1G77120	alcohol dehydrogenase 1	shared
Solyc02g086970.3	Aldehyde dehydrogenase (AHRD V3.3 *** Q1AFF6_VITPS)	AT3G48000	aldehyde dehydrogenase 2B4	shared
Solyc01g109160.4	CYP74C4	AT5G42650	allene oxide synthase	shared
Solyc04g014930.2	Alpha 1,4-glycosyltransferase family protein (AHRD V3.3 --* Q2MGS1_MEDTR)	AT4G19900	alpha 1,4-glycosyltransferase family protein	shared
Solyc07g055720.3	Heat shock protein, putative (AHRD V3.3 *** Q8LD91_ARATH)	AT1G06460	alpha-crystallin domain 32.1	shared
Solyc12g035430.1	LOW QUALITY:Alpha-N-acetylglucosaminidase (AHRD V3.3 *-* Q9ZR45_TOBAC)	AT5G13690	alpha-N-acetylglucosaminidase family / NAGLU family	shared
Solyc04g081670.3	Vacuolar-processing enzyme (AHRD V3.3 *-* W9R3H2_9ROSA)	AT2G25940	alpha-vacuolar processing enzyme	shared
Solyc01g103660.3	Embryogenesis-associated EMB8 (AHRD V3.3 *** A0A0B0MZB5_GOSAR)	AT5G49950	alpha/beta-Hydrolases superfamily protein	shared
Solyc07g032170.3	alpha/beta-Hydrolases superfamily protein (AHRD V3.3 *-* AT4G24160.2)	AT4G24160	alpha/beta-Hydrolases superfamily protein	shared
Solyc07g042500.3	Alpha/beta-Hydrolases superfamily protein, putative (AHRD V3.3 *** A0A061GM37_THECC)	AT2G03140	alpha/beta-Hydrolases superfamily protein	shared
Solyc08g078090.1	Alpha/beta-Hydrolases superfamily protein (AHRD V3.3 *** A0A061GB30_THECC)	AT4G16820	alpha/beta-Hydrolases superfamily protein	shared
Solyc09g010220.3	Lysosomal pro-X carboxypeptidase, putative (AHRD V3.3 *** B9SX01_RICCO)	AT2G24280	alpha/beta-Hydrolases superfamily protein	shared
Solyc12g042890.2	Acyl-protein thioesterase 2 (AHRD V3.3 *** A0A0B0PZC3_GOSAR)	AT1G52700	alpha/beta-Hydrolases superfamily protein	shared
Solyc05g009590.3	aluminum activated malate transporter family protein (AHRD V3.3 *** AT1G18420.1)	AT3G18440	aluminum-activated malate transporter 9	shared
Solyc07g066000.3	Amino acid permease (AHRD V3.3 *-* S8CYC9_9LAMI)	AT1G44100	amino acid permease 5	shared
Solyc02g032860.3	5'-adenylylsulfate reductase (AHRD V3.3 *** A0A072V4H5_MEDTR)	AT4G21990	APS reductase 3	shared
Solyc03g031620.3	5'-adenylylsulfate reductase (AHRD V3.3 *** A0A072V4H5_MEDTR)	AT4G21990	APS reductase 3	shared
Solyc02g092783.1	Tetratricopeptide repeat-containing protein (AHRD V3.3 *** D7MQ06_ARALL)	AT5G43120	ARM-repeat/Tetratricopeptide repeat (TPR)-like protein	shared
Solyc11g066890.1	Arogenate dehydratase (AHRD V3.3 *** K4D9U6_SOLLC)	AT1G08250	arogenate dehydratase 6	shared
Solyc03g116460.3	Aspartate racemase (AHRD V3.3 *** A0A0B2QLV5_GLYSO)	AT1G15410	aspartate-glutamate racemase family	shared
Solyc02g062330.2	Kinesin-like protein (AHRD V3.3 *** M1AVJ1_SOLTU)	AT5G66310	ATP binding microtubule motor family protein	shared
Solyc01g017220.1	ATP synthase epsilon chain, chloroplastic (AHRD V3.3 *** ATPE_SOLLC)	ATCG00470	ATP synthase epsilon chain	shared
Solyc04g039850.1	LOW QUALITY:ATP synthase subunit beta (AHRD V3.3 *-* ATCG00480.1)	ATCG00480	ATP synthase subunit beta	shared
Solyc07g062000.1	LOW QUALITY:ATP synthase subunit beta (AHRD V3.3 *-* Q9MTX5_9SOLN)	ATCG00480	ATP synthase subunit beta	shared
Solyc12g062530.2	ATP synthase beta subunit (AHRD V3.3 *-* H6X0W0_9ASTE)	ATCG00480	ATP synthase subunit beta	shared
Solyc07g027010.1	LOW QUALITY:ATP synthase subunit alpha (AHRD V3.3 *-* Q5VL33_9LILI)	AT2G07698	ATPase, F1 complex, alpha subunit protein	shared
Solyc10g080730.2	Thioredoxin, putative (AHRD V3.3 *** B9SHJ2_RICCO)	AT1G08570	atypical CYS HIS rich thioredoxin 4	shared
Solyc03g120390.3	Auxin responsive protein IPR003311 AUX_IAA protein	AT1G04250	AUX/IAA transcriptional regulator family protein	shared
Solyc03g031990.3	Auxin efflux carrier family protein (AHRD V3.3 *** AT1G20925.1)	AT1G20925	Auxin efflux carrier family protein	shared
Solyc12g095750.2	Auxin efflux carrier family protein, putative (AHRD V3.3 *** A0A061FMX0_THECC)	AT1G20925	Auxin efflux carrier family protein	shared
Solyc06g063280.1	LOW QUALITY:Zinc finger family protein (AHRD V3.3 *** B9HV28_POPTR)	AT3G21150	B-box 32	shared
Solyc09g074560.3	CONSTANS-like zinc finger protein (AHRD V3.3 *** A0A0H3YNS5_9ROSI)	AT2G47890	B-box type zinc finger protein with CCT domain	shared
Solyc02g078130.3	bHLH transcription factor 079	AT4G20970	basic helix-loop-helix (bHLH) DNA-binding superfamily protein	shared
Solyc04g006990.3	bHLH transcription factor 029	AT1G68810	basic helix-loop-helix (bHLH) DNA-binding superfamily protein	shared
Solyc06g069370.3	bHLH transcription factor 046	AT5G08130	basic helix-loop-helix (bHLH) DNA-binding superfamily protein	shared
Solyc09g065100.2	bHLH transcription factor 150	AT4G09820	basic helix-loop-helix (bHLH) DNA-binding superfamily protein	shared
Solyc10g008245.1	basic helix-loop-helix (bHLH) DNA-binding superfamily protein (AHRD V3.3 *** AT4G20970.1)	AT4G20970	basic helix-loop-helix (bHLH) DNA-binding superfamily protein	shared
Solyc02g061990.3	Bzip transcription factor (AHRD V3.3 *** A0A087GK23_ARAAL)	AT2G17770	basic region/leucine zipper motif 27	shared
Solyc08g061130.3	BZIP transcription factor (AHRD V3.3 *** L0MZN5_MALDO)	AT5G11260	Basic-leucine zipper (bZIP) transcription factor family protein	shared
Solyc10g083380.2	BZIP transcription factor family protein (AHRD V3.3 *-* B9MTQ4_POPTR)	AT1G19490	Basic-leucine zipper (bZIP) transcription factor family protein	shared
Solyc06g007240.3	BAG family molecular chaperone regulator 2 (AHRD V3.3 *** A0A0B2PCD3_GLYSO)	AT5G52060	BCL-2-associated athanogene 1	shared
Solyc01g044373.1	HAT family dimerisation domain containing protein (AHRD V3.3 *-* Q2QRD1_ORYSJ)	AT3G42170	BED zinc finger ;hAT family dimerisation domain	shared
Solyc09g091030.3	Beta-amylase 1	AT3G23920	beta-amylase 1	shared
Solyc11g028275.1	Condensin complex subunit 1 (AHRD V3.3 *-* A0A164XVD4_DAUCA)	AT3G57060	binding	shared
Solyc06g071830.2	BTB/POZ and TAZ domain protein (AHRD V3.3 *** G7JMM8_MEDTR)	AT5G63160	BTB and TAZ domain protein 1	shared
Solyc06g071820.3	BTB/POZ and TAZ domain protein (AHRD V3.3 *** G7JMM8_MEDTR)	AT3G48360	BTB and TAZ domain protein 2	shared
Solyc09g082660.3	Caffeoyl-CoA O-methyltransferase (AHRD V3.3 *** Q2YHM9_PLAMJ)	AT1G67980	caffeoyl-CoA 3-O-methyltransferase	shared
Solyc10g079790.1	Plant calmodulin-binding-like protein (AHRD V3.3 *-* G7KRQ7_MEDTR)	AT5G04020	calmodulin binding	shared
Solyc06g035520.3	Gibberellin receptor GID1 (AHRD V3.3 *** A0A151RHF2_CAJCA)	AT5G62180	carboxyesterase 20	shared
Solyc11g071225.1	Carotenoid cleavage dioxygenase (AHRD V3.3 *** B6UEM5_MAIZE)	AT3G63520	carotenoid cleavage dioxygenase 1	shared
Solyc03g115770.3	Timing of cab expression 1/pseudo-response regulator 1 (AHRD V3.3 *** J9PWT0_NICAT)	AT5G61380	CCT motif -containing response regulator protein	shared
Solyc02g069490.3	Sterol reductase (AHRD V3.3 *** E1VD17_SOLTU)	AT3G19820	cell elongation protein / DWARF1 / DIMINUTO (DIM)	shared
Solyc09g091510.3	chalcone synthase 1	AT5G13930	Chalcone and stilbene synthase family protein	shared
Solyc05g052240.3	Chalcone-flavonone isomerase family protein (AHRD V3.3 *** A0A0V0H4Z0_SOLCH)	AT5G05270	Chalcone-flavanone isomerase family protein	shared
Solyc05g008120.3	Chaperone DnaJ (AHRD V3.3 *** A0A0B0MDP3_GOSAR)	AT1G71000	Chaperone DnaJ-domain superfamily protein	shared
Solyc02g081060.3	Retrovirus-related Pol polyprotein from transposon TNT 1-94 (AHRD V3.3 *** A0A151T5P9_CAJCA)	AT4G04330	Chaperonin-like RbcX protein	shared
Solyc01g098420.2	Receptor protein kinase, putative (AHRD V3.3 *-* B9SH40_RICCO)	AT3G21630	chitin elicitor receptor kinase 1	shared
Solyc08g077530.3	Beta-amylase (AHRD V3.3 *** K4CNB2_SOLLC)	AT4G17090	chloroplast beta-amylase	shared
Solyc02g011815.1	30S ribosomal protein S15, chloroplastic (AHRD V3.3 *-* RR15_SOLLC)	ATCG01120	chloroplast ribosomal protein S15	shared
Solyc01g017110.1	NADH dehydrogenase subunit (AHRD V3.3 *-* Q8HSC3_9SOLN)	ATCG01280	Chloroplast Ycf2;ATPase, AAA type, core	shared
Solyc06g082535.1	cinnamate-4-hydroxylase (AHRD V3.3 *** AT2G30490.1)	AT2G30490	cinnamate-4-hydroxylase	shared
Solyc07g054180.3	Clathrin light chain protein (AHRD V3.3 *** AT2G20760.1)	AT2G20760	Clathrin light chain protein	shared
Solyc04g082200.2	LOW QUALITY:dehydrin	AT1G20440	cold-regulated 47	shared
Solyc07g045180.3	CONSTANS-like zinc finger protein (AHRD V3.3 *** A0A023GS52_SOYBN)	AT3G07650	CONSTANS-like 9	shared
Solyc12g006240.2	CONSTANS-like zinc finger protein (AHRD V3.3 *** A0A023GS52_SOYBN)	AT3G07650	CONSTANS-like 9	shared
Solyc02g088940.3	CTP synthase family protein (AHRD V3.3 *-* AT1G30820.1)	AT1G30820	CTP synthase family protein	shared
Solyc01g067215.1	cullin 1 (AHRD V3.3 *-* AT4G02570.4)	AT4G02570	cullin 1	shared
Solyc11g012130.2	Blue copper protein (AHRD V3.3 *** A0A0B2RLQ3_GLYSO)	AT3G27200	Cupredoxin superfamily protein	shared
Solyc08g067590.1	CW-type Zinc Finger (AHRD V3.3 *-* AT3G62900.3)	AT3G62900	CW-type Zinc Finger	shared
Solyc09g007840.3	Cyclic nucleotide-gated channel (AHRD V3.3 *** A0A0K9PRG4_ZOSMR)	AT2G28260	cyclic nucleotide-gated channel 15	shared
Solyc04g081660.2	cyclinB2_3	AT1G76310	CYCLIN B2;4	shared
Solyc11g007590.2	OTU domain-containing protein (AHRD V3.3 *** A0A0B2NUV7_GLYSO)	AT3G57810	Cysteine proteinases superfamily protein	shared
Solyc04g078140.3	Cytochrome B5 (AHRD V3.3 *** Q9ZSP7_PETHY)	AT5G48810	cytochrome B5 isoform D	shared
Solyc11g066580.2	flavonoid 3`%2C5`-hydroxylase	AT5G07990	Cytochrome P450 superfamily protein	shared
Solyc01g094140.3	Cytochrome P450 family protein (AHRD V3.3 *** B9IC22_POPTR)	AT2G45510	cytochrome P450, family 704, subfamily A, polypeptide 2	shared
Solyc03g111995.1	Cytochrome P450 (AHRD V3.3 *-* A0A103XWH5_CYNCS)	AT3G48280	cytochrome P450, family 71, subfamily A, polypeptide 25	shared
Solyc07g052070.2	Cytochrome P450 (AHRD V3.3 *** A0A118JYC4_CYNCS)	AT3G14690	cytochrome P450, family 72, subfamily A, polypeptide 15	shared
Solyc07g055550.2	Cytochrome P450 (AHRD V3.3 *** A0A124SAX2_CYNCS)	AT3G14690	cytochrome P450, family 72, subfamily A, polypeptide 15	shared
Solyc07g043460.3	Cytochrome P450, putative (AHRD V3.3 *** A0A061E4E7_THECC)	AT3G14610	cytochrome P450, family 72, subfamily A, polypeptide 7	shared
Solyc04g080650.3	LOW QUALITY:Cytochrome P450, putative (AHRD V3.3 *** B9R7Y0_RICCO)	AT1G19630	cytochrome P450, family 722, subfamily A, polypeptide 1	shared
Solyc02g090265.1	Cytochrome P450 (AHRD V3.3 *-* A0A103Y527_CYNCS)	AT2G45560	cytochrome P450, family 76, subfamily C, polypeptide 1	shared
Solyc02g090267.1	Cytochrome P450 (AHRD V3.3 *** Q8H0I6_PETHY)	AT2G45550	cytochrome P450, family 76, subfamily C, polypeptide 4	shared
Solyc09g092580.3	Cytochrome P450, putative (AHRD V3.3 *** B9R857_RICCO)	AT4G31500	cytochrome P450, family 83, subfamily B, polypeptide 1	shared
Solyc10g078240.2	Cytochrome P450 (AHRD V3.3 *** A0A103VZI8_CYNCS)	AT2G40890	cytochrome P450, family 98, subfamily A, polypeptide 3	shared
Solyc07g062810.3	Branched-chain-amino-acid aminotransferase-like protein (AHRD V3.3 *** I3SQ86_MEDTR)	AT5G57850	D-aminoacid aminotransferase-like PLP-dependent enzymes superfamily protein	shared
Solyc04g081900.3	Cysteine/Histidine-rich C1 domain family protein (AHRD V3.3 --* AT2G44380.1)	AT1G60420	DC1 domain-containing protein	shared
Solyc02g084850.3	Abscisic acid and environmental stress-inducible protein TAS14 (AHRD V3.3 *** TAS14_SOLLC)	AT3G50980	dehydrin xero 1	shared
Solyc10g006000.3	Protein DEK (AHRD V3.3 *** A0A0B2PUB3_GLYSO)	AT3G48710	DEK domain-containing chromatin associated protein	shared
Solyc02g085020.3	dihydroflavonol 4-reductase	AT5G42800	dihydroflavonol 4-reductase	shared
Solyc05g054020.2	LOW QUALITY:NBS-LRR resistance protein-like protein (AHRD V3.3 *** A1Y9Q9_SOLLC)	AT1G59620	Disease resistance protein (CC-NBS-LRR class) family	shared
Solyc12g042910.2	Cryptochrome-1 (AHRD V3.3 *** A0A151SGR1_CAJCA)	AT3G15620	DNA photolyase family protein	shared
Solyc07g007220.3	Protein phosphatase 2c, putative (AHRD V3.3 *** B9T2N5_RICCO)	AT2G25620	DNA-binding protein phosphatase 1	shared
Solyc07g021290.1	LOW QUALITY:DNA-directed RNA polymerase subunit beta'' (AHRD V3.3 *-* RPOC2_SOLLC)	ATCG00170	DNA-directed RNA polymerase family protein	shared
Solyc12g062560.1	Ribulose bisphosphate carboxylase large chain (AHRD V3.3 *-* RBL_CLAXA)	ATCG00180	DNA-directed RNA polymerase family protein	shared
Solyc02g014860.3	DnaJ domain-containing protein (AHRD V3.3 *** A0A124SD50_CYNCS)	AT5G23240	DNAJ heat shock N-terminal domain-containing protein	shared
Solyc03g098030.3	Type I inositol-1,4,5-trisphosphate 5-phosphatase (AHRD V3.3 *** G7KHW0_MEDTR)	AT2G01900	DNAse I-like superfamily protein	shared
Solyc08g016586.1	Ulp1 protease family, C-terminal catalytic domain containing protein (AHRD V3.3 *-* Q60D46_SOLDE)	AT1G31150	Domain of unknown function (DUF1985)	shared
Solyc06g051460.3	Double Clp-N motif-containing P-loop nucleoside triphosphate hydrolases superfamily protein, putative (AHRD V3.3 *** A0A061FKC4_THECC)	AT2G29970	Double Clp-N motif-containing P-loop nucleoside triphosphate hydrolases superfamily protein	shared
Solyc01g108040.1	Dynamin-related protein 3A (AHRD V3.3 *-* A0A1D1XWG2_9ARAE)	AT2G14120	dynamin related protein	shared
Solyc01g005310.3	Dynamin (AHRD V3.3 *** E5GB64_CUCME)	AT1G14830	DYNAMIN-like 1C	shared
Solyc01g108035.1	Dynamin-related protein 3A (AHRD V3.3 *-* A0A0B2RN44_GLYSO)	AT4G33650	dynamin-related protein 3A	shared
Solyc11g042800.2	Late embryogenesis abundant protein (AHRD V3.3 *-* Q56ZD1_ARATH)	AT2G36640	embryonic cell protein 63	shared
Solyc11g068880.2	Eukaryotic aspartyl protease family protein, putative (AHRD V3.3 *-* A0A061GZN2_THECC)	AT3G52500	Eukaryotic aspartyl protease family protein	shared
Solyc04g077760.1	LOW QUALITY:Exocyst complex component 7 (AHRD V3.3 *** W9RYK4_9ROSA)	AT4G31540	exocyst subunit exo70 family protein G1	shared
Solyc12g055770.1	LOW QUALITY:Exocyst complex exo70-like protein (AHRD V3.3 *** G7I5R5_MEDTR)	AT4G31540	exocyst subunit exo70 family protein G1	shared
Solyc03g115320.2	Expansin (AHRD V3.3 *** Q7X9Q3_SAMNI)	AT5G39280	expansin A23	shared
Solyc05g013180.3	Phosphate transporter PHO1-like protein (AHRD V3.3 *** A0A193CD86_9ERIC)	AT1G69480	EXS (ERD1/XPR1/SYG1) family protein	shared
Solyc01g010502.1	LOW QUALITY:F-box family protein (AHRD V3.3 *-* AT1G31080.1)	AT1G47730	F-box and associated interaction domains-containing protein	shared
Solyc02g079150.2	F-box family protein (AHRD V3.3 *** B9H220_POPTR)	AT4G21510	F-box family protein	shared
Solyc09g005520.2	LOW QUALITY:F-box family protein, putative (AHRD V3.3 *-* A0A061GHK4_THECC)	AT3G16210	F-box family protein	shared
Solyc10g052650.2	F-box protein (AHRD V3.3 *-* A0A0B2RZB4_GLYSO)	AT2G16365	F-box family protein	shared
Solyc07g064410.1	Kua-ubiquitin conjugating enzyme hybrid, localization (AHRD V3.3 *** A0A103XYI2_CYNCS)	AT4G27030	fatty acid desaturase A	shared
Solyc08g063090.2	Sphingolipid delta-8 desaturase (AHRD V3.3 *** A4GK73_TOBAC)	AT2G46210	Fatty acid/sphingolipid desaturase	shared
Solyc03g097390.3	Acyl-[acyl-carrier-protein] hydrolase (AHRD V3.3 *** K4BJF6_SOLLC)	AT1G08510	fatty acyl-ACP thioesterases B	shared
Solyc10g078265.1	Peptidyl-prolyl cis-trans isomerase (AHRD V3.3 *** A0A0K9NXQ5_ZOSMR)	AT5G48570	FKBP-type peptidyl-prolyl cis-trans isomerase family protein	shared
Solyc02g083860.3	flavanone 3-dioxygenase	AT3G51240	flavanone 3-hydroxylase	shared
Solyc01g005300.3	Flavin-binding kelch domain F box protein (AHRD V3.3 *** A0A088AWQ7_SOYBN)	AT1G68050	flavin-binding, kelch repeat, f box 1	shared
Solyc03g115830.2	Galactoside 2-alpha-L-fucosyltransferase (AHRD V3.3 *** W9QNS6_9ROSA)	AT2G03220	fucosyltransferase 1	shared
Solyc07g047920.2	Galactoside 2-alpha-L-fucosyltransferase (AHRD V3.3 *** FUT1_PEA)	AT2G03220	fucosyltransferase 1	shared
Solyc05g050220.3	TAF-3 (AHRD V3.3 *** Q40587_TOBAC)	AT2G46270	G-box binding factor 3	shared
Solyc03g083160.2	gamma-irradiation and mitomycin c induced 1 (AHRD V3.3 *-* AT5G24280.3)	AT5G24280	gamma-irradiation and mitomycin c induced 1	shared
Solyc01g108047.1	GATA transcription factor-like protein (AHRD V3.3 *** A0A0X7YHI0_SOLTU)	AT4G17570	GATA transcription factor 26	shared
Solyc01g099030.3	GDSL esterase/lipase (AHRD V3.3 *** A0A0B2PL43_GLYSO)	AT1G28590	GDSL-like Lipase/Acylhydrolase superfamily protein	shared
Solyc06g083650.3	GDSL esterase/lipase (AHRD V3.3 *** A0A0B2SFU0_GLYSO)	AT5G33370	GDSL-like Lipase/Acylhydrolase superfamily protein	shared
Solyc07g061730.3	gibberellin 2-oxidase 5	AT1G30040	gibberellin 2-oxidase	shared
Solyc10g007570.3	Gibberellin 2-oxidase 2 (AHRD V3.3 *** I0B5A7_PETHY)	AT1G30040	gibberellin 2-oxidase	shared
Solyc02g080120.2	Gibberellin 2-beta- dioxygenase 7	AT4G21200	gibberellin 2-oxidase 8	shared
Solyc01g109790.3	ADP-glucose pyrophosphorylase large subunit 1	AT4G39210	Glucose-1-phosphate adenylyltransferase family protein	shared
Solyc01g005000.3	Glutamate decarboxylase (AHRD V3.3 *** B1Q3F2_SOLLC)	AT2G02010	glutamate decarboxylase 4	shared
Solyc02g081340.3	Glutathione S-transferase (AHRD V3.3 *** E1AWJ7_CAPAN)	AT3G03190	glutathione S-transferase F11	shared
Solyc05g006730.3	Glutathione S-transferase family protein (AHRD V3.3 *-* AT1G10370.1)	AT1G10370	Glutathione S-transferase family protein	shared
Solyc01g091260.3	Myeloid leukemia factor 1 (AHRD V3.3 *** A0A0B0Q1A9_GOSAR)	AT4G22740	glycine-rich protein	shared
Solyc03g093800.1	glycine-rich protein (AHRD V3.3 *-* AT5G61660.1)	AT5G61660	glycine-rich protein	shared
Solyc07g052960.2	GRAS family TF	AT3G49950	GRAS family transcription factor	shared
Solyc11g013740.2	Guanylate-binding family protein (AHRD V3.3 *-* AT5G46070.1)	AT5G46070	Guanylate-binding family protein	shared
Solyc03g120020.3	Boron transporter, putative (AHRD V3.3 *** A0A061G9M0_THECC)	AT1G15460	HCO3- transporter family	shared
Solyc11g066100.2	heat shock protein 70 (AHRD V3.3 *** AT3G12580.1)	AT5G02500	heat shock cognate protein 70-1	shared
Solyc03g115230.3	Solanum lycopersicum heat shock protein	AT1G74310	heat shock protein 101	shared
Solyc05g014280.3	small heat shock protein 1	AT4G27670	heat shock protein 21	shared
Solyc04g011440.4	ethylene-responsive heat shock protein cognate 70	AT3G12580	heat shock protein 70	shared
Solyc06g052050.3	Heat shock protein 70 (AHRD V3.3 *** Q9M4E8_CUCSA)	AT5G42020	Heat shock protein 70 (Hsp 70) family protein	shared
Solyc06g053950.2	Heat shock transcription factor (AHRD V3.3 *-* A0A076L230_GOSHI)	AT3G22830	heat shock transcription factor A6B	shared
Solyc06g053960.3	SolycHsfA6b	AT3G22830	heat shock transcription factor A6B	shared
Solyc09g065660.3	SolycHsfA7	AT3G22830	heat shock transcription factor A6B	shared
Solyc09g082670.3	SolycHsfA6a	AT3G22830	heat shock transcription factor A6B	shared
Solyc08g062960.3	SolycHsfA2	AT2G26150	heat shock transcription factor A2	shared
Solyc04g015030.3	Heavy metal transport/detoxification superfamily protein (AHRD V3.3 *** I3STQ6_MEDTR)	AT5G50740	Heavy metal transport/detoxification superfamily protein	shared
Solyc05g049990.3	Heavy metal transport/detoxification superfamily protein (AHRD V3.3 *** A0A072TW71_MEDTR)	AT1G01490	Heavy metal transport/detoxification superfamily protein	shared
Solyc11g012690.2	Heavy metal transport/detoxification superfamily protein (AHRD V3.3 *** I3STQ6_MEDTR)	AT5G50740	Heavy metal transport/detoxification superfamily protein	shared
Solyc03g007230.3	Protein phosphatase 2c, putative (AHRD V3.3 *** B9RIK1_RICCO)	AT1G07430	highly ABA-induced PP2C gene 2	shared
Solyc06g051940.3	Protein phosphatase 2c, putative (AHRD V3.3 *** B9RIK1_RICCO)	AT1G07430	highly ABA-induced PP2C gene 2	shared
Solyc12g094440.2	High mobility group family (AHRD V3.3 *** E5GCD0_CUCME)	AT1G76110	HMG (high mobility group) box protein with ARID/BRIGHT DNA-binding domain	shared
Solyc01g096320.3	Homeobox-leucine zipper protein (AHRD V3.3 *** M4W1Z7_TOBAC)	AT2G46680	homeobox 7	shared
Solyc04g077220.3	Homeobox-leucine zipper protein family (AHRD V3.3 *** AT4G37790.1)	AT4G37790	Homeobox-leucine zipper protein family	shared
Solyc02g090400.3	Two-component response regulator (AHRD V3.3 *** W9S3N8_9ROSA)	AT4G37180	Homeodomain-like superfamily protein	shared
Solyc06g005680.3	Two-component response regulator (AHRD V3.3 *** W9RUI2_9ROSA)	AT3G46640	Homeodomain-like superfamily protein	shared
Solyc07g052490.3	Myb transcription factor (AHRD V3.3 *-* A0A072UKM9_MEDTR)	AT1G01380	Homeodomain-like superfamily protein	shared
Solyc04g072160.3	HSP20-like chaperones superfamily protein (AHRD V3.3 *** A0A061FJ96_THECC)	AT4G02450	HSP20-like chaperones superfamily protein	shared
Solyc06g076570.3	class I small heat shock protein	AT1G07400	HSP20-like chaperones superfamily protein	shared
Solyc11g071560.2	Hsp20/alpha crystallin family protein (AHRD V3.3 *** Q94GC7_SOLDE)	AT2G27140	HSP20-like chaperones superfamily protein	shared
Solyc07g052060.2	LOW QUALITY:HXXXD-type acyl-transferase family protein, putative (AHRD V3.3 *** A0A061E8Z9_THECC)	AT3G26040	HXXXD-type acyl-transferase family protein	shared
Solyc12g088170.2	HXXXD-type acyl-transferase family protein, putative (AHRD V3.3 *** A0A061E8Z9_THECC)	AT3G26040	HXXXD-type acyl-transferase family protein	shared
Solyc03g097440.3	Dehydrogenase/reductase SDR family protein 7-like protein (AHRD V3.3 *** A0A0B0P5K8_GOSAR)	AT5G50700	hydroxysteroid dehydrogenase 1	shared
Solyc09g074780.3	Zinc finger protein (AHRD V3.3 *** E9NZV2_PHAVU)	AT3G50700	indeterminate(ID)-domain 2	shared
Solyc12g098590.2	Glycosyltransferase (AHRD V3.3 *** K4DHN2_SOLLC)	AT4G15550	indole-3-acetate beta-D-glucosyltransferase	shared
Solyc01g096865.1	AP2-like ethylene-responsive transcription factor (AHRD V3.3 *-* A0A0K9PVT8_ZOSMR)	AT3G54320	Integrase-type DNA-binding superfamily protein	shared
Solyc05g052410.2	Dehydration responsive element binding protein (AHRD V3.3 *** Q8GZF2_SOLLC)	AT2G40340	Integrase-type DNA-binding superfamily protein	shared
Solyc06g050520.2	dehydration responsive element binding protein 1	AT2G40340	Integrase-type DNA-binding superfamily protein	shared
Solyc08g081650.2	Ethylene-responsive transcription factor (AHRD V3.3 *-* W9RJN8_9ROSA)	AT1G68550	Integrase-type DNA-binding superfamily protein	shared
Solyc03g019710.3	TDR8	AT2G42830	K-box region and MADS-box transcription factor family protein	shared
Solyc01g081210.3	F-box/kelch-repeat protein SKIP25, putative (AHRD V3.3 *** G7K6R4_MEDTR)	AT1G31350	KAR-UP F-box 1	shared
Solyc10g078770.2	Seed maturation protein (AHRD V3.3 *** Q9LKC5_GLYTO)	AT5G06760	Late Embryogenesis Abundant 4-5	shared
Solyc07g053360.3	Late embryogenesis abundant domain-containing family protein (AHRD V3.3 *** B9IQP9_POPTR)	AT2G42560	late embryogenesis abundant domain-containing protein / LEA domain-containing protein	shared
Solyc10g008040.3	Late embryogenesis abundant protein-like (AHRD V3.3 *-* Q9LF88_ARATH)	AT2G42560	late embryogenesis abundant domain-containing protein / LEA domain-containing protein	shared
Solyc12g097050.2	Late embryogenesis-abundant protein (AHRD V3.3 --* Q5G1J3_ISATI)	AT1G52690	Late embryogenesis abundant protein (LEA) family protein	shared
Solyc02g086960.2	LOW QUALITY:Serine-threonine protein kinase, putative (AHRD V3.3 *** A0A061ED60_THECC)	AT2G01820	Leucine-rich repeat protein kinase family protein	shared
Solyc11g069960.2	RLK-1	AT1G68400	leucine-rich repeat transmembrane protein kinase family protein	shared
Solyc08g080040.3	Anthocyanidin synthase (AHRD V3.3 *** A0A0A1E1Z9_9SOLA)	AT4G22880	leucoanthocyanidin dioxygenase	shared
Solyc05g005915.1	Major facilitator superfamily protein (AHRD V3.3 *** AT1G52190.1)	AT1G52190	Major facilitator superfamily protein	shared
Solyc08g074960.3	Major facilitator superfamily protein (AHRD V3.3 *** AT5G45275.1)	AT5G45275	Major facilitator superfamily protein	shared
Solyc01g091870.3	SPX domain-containing family protein (AHRD V3.3 *** B9GW54_POPTR)	AT4G22990	Major Facilitator Superfamily with SPX (SYG1/Pho81/XPR1) domain-containing protein	shared
Solyc01g109950.3	Kinase, putative (AHRD V3.3 *** B9RH93_RICCO)	AT4G39110	Malectin/receptor-like protein kinase family protein	shared
Solyc01g066560.3	Protein DETOXIFICATION (AHRD V3.3 *** K4AWQ7_SOLLC)	AT5G49130	MATE efflux family protein	shared
Solyc03g025190.4	anthocyanin permease	AT4G00350	MATE efflux family protein	shared
Solyc06g006000.3	Maternal effect embryo arrest 59 (AHRD V3.3 *** A0A061GXA8_THECC)	AT4G37300	maternal effect embryo arrest 59	shared
Solyc04g071290.3	Mitochondrial substrate carrier family protein (AHRD V3.3 *-* AT5G42130.1)	AT5G42130	Mitochondrial substrate carrier family protein	shared
Solyc08g078695.1	Heat-shock protein, putative (AHRD V3.3 *** B9SSG1_RICCO)	AT4G25200	mitochondrion-localized small heat shock protein 23.6	shared
Solyc07g064820.1	LOW QUALITY:MAP kinase kinase kinase 59	AT5G55090	mitogen-activated protein kinase kinase kinase 15	shared
Solyc02g090990.1	MAP kinase kinase kinase 23	AT4G36950	mitogen-activated protein kinase kinase kinase 21	shared
Solyc05g046150.3	Major latex-like protein (AHRD V3.3 *** B5THI3_PANGI)	AT1G70840	MLP-like protein 31	shared
Solyc03g044930.2	Sn-1 protein (AHRD V3.3 *** Q42393_CAPAN)	AT1G70890	MLP-like protein 43	shared
Solyc10g081320.1	LOW QUALITY:R2R3MYB transcription factor 69	AT1G69560	myb domain protein 105	shared
Solyc10g086250.2	R2R3MYB transcription factor 75	AT1G66370	myb domain protein 113	shared
Solyc10g086270.2	R2R3MYB transcription factor 28	AT1G66370	myb domain protein 113	shared
Solyc10g086290.2	R2R3MYB transcription factor 114	AT1G66370	myb domain protein 113	shared
Solyc01g079620.3	colorless fruit epidermis	AT2G47460	myb domain protein 12	shared
Solyc12g049350.2	R2R3MYB transcription factor 11	AT2G47460	myb domain protein 12	shared
Solyc06g005330.3	R2R3MYB transcription factor 59	AT3G46130	myb domain protein 48	shared
Solyc08g008480.3	Myb transcription factor,R2R3MYB transcription factor 4	AT3G13540	myb domain protein 5	shared
Solyc10g005400.3	Myo-inositol oxygenase (AHRD V3.3 *** C6K2L2_SOLLC)	AT1G14520	myo-inositol oxygenase 1	shared
Solyc04g074120.3	Synaptonemal complex protein 1 (AHRD V3.3 *** A0A151TZS6_CAJCA)	AT1G22260	Myosin heavy chain-related protein	shared
Solyc07g009520.2	WEB family protein, chloroplastic (AHRD V3.3 *-* A0A199V6Z9_ANACO)	AT4G40020	Myosin heavy chain-related protein	shared
Solyc09g091080.3	myosin XI A (AHRD V3.3 *** AT1G04600.1)	AT1G04600	myosin XI A	shared
Solyc00g006540.1	LOW QUALITY:DNA ligase (AHRD V3.3 --* K4CCL3_SOLLC)	NA	NA	shared
Solyc00g273110.2	DNA ligase 4 (AHRD V3.3 --* H6URY6_NICBE)	NA	NA	shared
Solyc01g006380.2	U-box domain-containing protein (AHRD V3.3 *** B6V8G2_HELAN)	NA	NA	shared
Solyc01g011460.2	Retrovirus-related Pol polyprotein from transposon TNT 1-94 (AHRD V3.3 *-* A0A151R160_CAJCA)	NA	NA	shared
Solyc01g017490.1	calcium-dependent lipid-binding family protein (AHRD V3.3 --* AT1G48090.6)	NA	NA	shared
Solyc01g067220.1	RING/U-box superfamily protein (AHRD V3.3 --* AT1G32361.1)	NA	NA	shared
Solyc01g104413.1	Pre-mRNA-processing-splicing factor (AHRD V3.3 --* AT1G80070.1)	NA	NA	shared
Solyc01g104433.1	Pentatricopeptide repeat-containing protein (AHRD V3.3 --* D7MPU5_ARALL)	NA	NA	shared
Solyc02g011873.1	IAA carboxylmethyltransferase 1 (AHRD V3.3 --* AT5G55250.2)	NA	NA	shared
Solyc02g011975.1	50S ribosomal protein L23, chloroplastic (AHRD V3.3 --* A0A023I0F1_9ROSI)	NA	NA	shared
Solyc02g020880.2	60S ribosomal protein L12 (AHRD V3.3 --* RL12_PRUAR)	NA	NA	shared
Solyc02g030464.1	Glucan endo-1,3-beta-glucosidase 8 (AHRD V3.3 --* E138_ARATH)	NA	NA	shared
Solyc02g032360.3	Desiccation-related protein PCC13-62 (AHRD V3.3 --* A0A061DRH0_THECC)	NA	NA	shared
Solyc02g049090.1	LOW QUALITY:Guard cell S-type anion channel SLAC1 (AHRD V3.3 --* SLAC1_ARATH)	NA	NA	shared
Solyc02g067000.2	Latex abundant protein 1 (AHRD V3.3 --* B9N9R7_POPTR)	NA	NA	shared
Solyc02g070840.1	secretory carrier 3 (AHRD V3.3 --* AT1G61250.2)	NA	NA	shared
Solyc02g082435.1	DNA mismatch repair protein mutL (AHRD V3.3 *-* A0A0B2SBZ1_GLYSO)	NA	NA	shared
Solyc02g082440.2	NSP-interacting kinase 2 (AHRD V3.3 --* AT3G25560.3)	NA	NA	shared
Solyc02g082613.1	Phototropic-responsive NPH3 family protein (AHRD V3.3 --* AT1G03010.3)	NA	NA	shared
Solyc02g084167.1	DNA mismatch repair protein mutL (AHRD V3.3 --* A0A151THR9_CAJCA)	NA	NA	shared
Solyc02g085025.1	Calcium-dependent lipid-binding (CaLB domain) family protein (AHRD V3.3 --* AT5G37740.2)	NA	NA	shared
Solyc02g088987.1	LOW QUALITY:Arginine/serine-rich splicing factor, putative (AHRD V3.3 --* B9T7V5_RICCO)	NA	NA	shared
Solyc02g090500.3	Phenylalanine ammonia-lyase (AHRD V3.3 --* D3K195_9ROSA)	NA	NA	shared
Solyc02g092515.1	DNA mismatch repair protein MLH3-like protein (AHRD V3.3 *-* A0A0X7YCF6_SOLTU)	NA	NA	shared
Solyc03g007400.2	Galactose oxidase/kelch repeat superfamily protein (AHRD V3.3 --* AT2G29780.2)	NA	NA	shared
Solyc03g026000.3	cold regulated protein 27 (AHRD V3.3 --* AT5G42900.2)	NA	NA	shared
Solyc03g044600.2	multidrug resistance-associated protein 6 (AHRD V3.3 --* AT3G21250.6)	NA	NA	shared
Solyc03g053040.1	nucleolar RNA-binding Nop10p family protein (AHRD V3.3 -** AT2G20490.3)	NA	NA	shared
Solyc03g058215.1	Mitochondrial transcription termination factor family protein (AHRD V3.3 --* AT1G61970.7)	NA	NA	shared
Solyc03g059235.1	Zinc finger protein CONSTANS-LIKE 3 (AHRD V3.3 --* COL3_ARATH)	NA	NA	shared
Solyc03g071730.1	LOW QUALITY:RNA-binding (RRM/RBD/RNP motifs) family protein (AHRD V3.3 --* AT1G31600.3)	NA	NA	shared
Solyc03g078580.3	LOW QUALITY:Unknown protein (AHRD V3.3 )	NA	NA	shared
Solyc03g116465.1	heavy metal atpase 4 (AHRD V3.3 --* AT2G19110.3)	NA	NA	shared
Solyc04g009145.1	tRNA wybutosine-synthesizing protein 2/3/4 (AHRD V3.3 --* TYW23_ARATH)	NA	NA	shared
Solyc04g014940.2	Glucose-1-phosphate adenylyltransferase family protein (AHRD V3.3 --* AT2G21590.7)	NA	NA	shared
Solyc04g018120.1	LOW QUALITY:Pattern formation protein EMB30 (AHRD V3.3 --* A0A0B2S8Q4_GLYSO)	NA	NA	shared
Solyc04g025282.1	autophagy 2 (AHRD V3.3 --* AT3G19190.3)	NA	NA	shared
Solyc04g050305.1	Nucleolar histone methyltransferase-related protein (AHRD V3.3 --* AT1G45248.3)	NA	NA	shared
Solyc04g057850.1	LOW QUALITY:Pvr4 (AHRD V3.3 *-* A0A1D5AHY8_CAPAN)	NA	NA	shared
Solyc04g076715.1	DNA-binding family protein (AHRD V3.3 -** A0A0K1ETQ6_9ROSI)	NA	NA	shared
Solyc04g082730.2	HSP20-like chaperones superfamily protein (AHRD V3.3 --* AT1G54850.1)	NA	NA	shared
Solyc05g009490.2	DNA polymerase epsilon catalytic subunit (AHRD V3.3 --* AT2G27120.3)	NA	NA	shared
Solyc05g021530.2	Alcohol dehydrogenase (AHRD V3.3 --* Q4LAW8_CAPCH)	NA	NA	shared
Solyc05g024410.3	Na+/H+ exchanger 8 (AHRD V3.3 --* AT1G14660.2)	NA	NA	shared
Solyc05g050240.3	Plastid division protein PDV1 (AHRD V3.3 *-* A0A199W2F8_ANACO)	NA	NA	shared
Solyc05g050695.1	Transmembrane Fragile-X-F-associated protein (AHRD V3.3 --* AT1G68820.2)	NA	NA	shared
Solyc05g050735.1	30S ribosomal protein S2, chloroplastic (AHRD V3.3 --* RR2_MARPO)	NA	NA	shared
Solyc05g053080.2	LOW QUALITY:endomembrane-type CA-ATPase 4 (AHRD V3.3 --* AT1G07670.2)	NA	NA	shared
Solyc06g005460.1	LOW QUALITY:Pectinesterase inhibitor (AHRD V3.3 *** PMEI_ACTDE)	NA	NA	shared
Solyc06g024200.1	BSD domain-containing protein (AHRD V3.3 --* AT1G26300.3)	NA	NA	shared
Solyc06g024207.1	alpha-1,2-Mannosidase (AHRD V3.3 --* D8RTN8_SELML)	NA	NA	shared
Solyc06g024230.1	LOW QUALITY:Senescence-associated protein, putative (AHRD V3.3 *-* A0A072THY4_MEDTR)	NA	NA	shared
Solyc06g024370.1	LOW QUALITY:calcium-dependent protein kinase 30 (AHRD V3.3 --* AT1G74740.1)	NA	NA	shared
Solyc06g043020.1	Atp synthase subunit alpha (AHRD V3.3 *** A0A061S892_9CHLO)	NA	NA	shared
Solyc06g048633.1	P-loop nucleoside triphosphate hydrolases superfamily protein with CH (Calponin Homology) domain-containing protein (AHRD V3.3 --* AT3G10310.2)	NA	NA	shared
Solyc06g051825.1	Excinuclease ABC, C subunit, N-terminal (AHRD V3.3 --* AT2G30350.2)	NA	NA	shared
Solyc06g062890.3	Unknown protein (AHRD V3.3 )	NA	NA	shared
Solyc06g067980.3	Late embryogenesis abundant protein (AHRD V3.3 --* Q2QKE8_CATRO)	NA	NA	shared
Solyc06g069060.1	LOW QUALITY:P-loop containing nucleoside triphosphate hydrolases superfamily protein (AHRD V3.3 --* AT5G67630.1)	NA	NA	shared
Solyc06g082020.3	Alternative NAD(P)H dehydrogenase 1 (AHRD V3.3 --* A0A061GX18_THECC)	NA	NA	shared
Solyc07g009450.1	LOW QUALITY:BEL1-like homeodomain 10 (AHRD V3.3 --* AT1G19700.5)	NA	NA	shared
Solyc07g017370.2	AMP-dependent synthetase and ligase family protein (AHRD V3.3 --* AT2G47240.4)	NA	NA	shared
Solyc07g017930.1	Transcription termination factor MTERF8, chloroplastic (AHRD V3.3 --* MTEF8_ARATH)	NA	NA	shared
Solyc07g019520.1	LOW QUALITY:Isocitrate lyase (AHRD V3.3 --* ACEA_RICCO)	NA	NA	shared
Solyc07g039280.1	LOW QUALITY:Senescence-associated protein, putative (AHRD V3.3 *-* A0A072THY2_MEDTR)	NA	NA	shared
Solyc07g039300.1	P-loop containing nucleoside triphosphate hydrolases superfamily protein (AHRD V3.3 --* AT1G73170.3)	NA	NA	shared
Solyc07g052250.3	Unknown protein (AHRD V3.3 )	NA	NA	shared
Solyc07g053225.1	Transmembrane amino acid transporter family protein (AHRD V3.3 --* AT1G08230.6)	NA	NA	shared
Solyc07g053250.3	F-box protein family (AHRD V3.3 --* A0A151SU61_CAJCA)	NA	NA	shared
Solyc07g054340.1	LOW QUALITY:RNI-like superfamily protein (AHRD V3.3 --* AT3G18150.1)	NA	NA	shared
Solyc08g015840.2	Receptor-like protein kinase-related family protein (AHRD V3.3 --* AT3G22020.2)	NA	NA	shared
Solyc08g016550.3	Unknown protein (AHRD V3.3 )	NA	NA	shared
Solyc08g022100.1	LOW QUALITY:Plasma-membrane choline transporter family protein (AHRD V3.3 --* AT3G04440.2)	NA	NA	shared
Solyc08g061160.2	LOW QUALITY:BnaC09g16480D protein (AHRD V3.3 *** A0A078G2W2_BRANA)	NA	NA	shared
Solyc08g061900.1	LOW QUALITY:NAD(P)H-quinone oxidoreductase subunit 2, chloroplastic (AHRD V3.3 *-* NU2C_SILLA)	NA	NA	shared
Solyc08g061903.1	Auxin response factor (AHRD V3.3 --* M5VPK1_PRUPE)	NA	NA	shared
Solyc08g066150.1	LOW QUALITY:Disease resistance protein (TIR-NBS-LRR class) family (AHRD V3.3 --* AT3G44480.5)	NA	NA	shared
Solyc08g067595.1	Ribonuclease H-like protein (AHRD V3.3 --* A0A061FNB8_THECC)	NA	NA	shared
Solyc08g078785.1	Peroxidase superfamily protein (AHRD V3.3 --* AT4G11290.1)	NA	NA	shared
Solyc08g080000.3	Transmembrane protein, putative (AHRD V3.3 *-* A0A072U537_MEDTR)	NA	NA	shared
Solyc08g081265.1	Flowering-promoting factor 1-like protein 3 (AHRD V3.3 --* FLP3_ORYSJ)	NA	NA	shared
Solyc09g007343.1	LOW QUALITY:F-box protein (AHRD V3.3 --* G7IWM2_MEDTR)	NA	NA	shared
Solyc09g010580.2	histidine biosynthesis bifunctional protein (HISIE) (AHRD V3.3 --* AT1G31860.3)	NA	NA	shared
Solyc09g010910.2	LOW QUALITY:Phosphatidylinositol 4-kinase alpha (AHRD V3.3 --* M8A4X8_TRIUA)	NA	NA	shared
Solyc09g057900.2	evolutionarily conserved C-terminal region 4 (AHRD V3.3 --* AT1G55500.6)	NA	NA	shared
Solyc09g059345.1	Zinc finger, CW-type (AHRD V3.3 --* A0A103YNR4_CYNCS)	NA	NA	shared
Solyc09g064640.1	LOW QUALITY:Cold acclimation protein WCOR518, related (AHRD V3.3 *-* Q6L3L4_SOLDE)	NA	NA	shared
Solyc09g074350.1	LOW QUALITY:chromatin remodeling factor17 (AHRD V3.3 --* AT5G18620.2)	NA	NA	shared
Solyc09g075880.3	CheY-like two-component responsive regulator family protein (AHRD V3.3 --* AT4G18020.9)	NA	NA	shared
Solyc09g090710.3	pfkB-like carbohydrate kinase family protein (AHRD V3.3 --* AT5G43910.2)	NA	NA	shared
Solyc10g047390.1	LOW QUALITY:Ycf1 (AHRD V3.3 *-* A0A0U1ZJ99_SOLCI)	NA	NA	shared
Solyc10g050670.1	LOW QUALITY:LOB domain-containing protein 7 (AHRD V3.3 --* AT1G72980.1)	NA	NA	shared
Solyc10g050720.2	LOW QUALITY:50S ribosomal protein L2, chloroplastic (AHRD V3.3 --* RK2_DIOEL)	NA	NA	shared
Solyc10g078325.1	MSCS-like 2 (AHRD V3.3 --* AT5G10490.3)	NA	NA	shared
Solyc10g081570.2	Marmande	NA	NA	shared
Solyc10g085285.1	Chalcone and stilbene synthase family protein (AHRD V3.3 --* AT4G00040.1)	NA	NA	shared
Solyc11g006160.2	Ethylene receptor homolog (AHRD V3.3 *-* Q9XET9_SOLLC)	NA	NA	shared
Solyc11g021020.1	Proteinase inhibitor II (AHRD V3.3 *-* B3F0C1_TOBAC)	NA	NA	shared
Solyc11g021140.1	Acyl-CoA N-acyltransferase with RING/FYVE/PHD-type zinc finger domain-containing protein (AHRD V3.3 --* AT2G27980.1)	NA	NA	shared
Solyc11g021170.1	S-adenosyl-L-methionine-dependent methyltransferases superfamily protein (AHRD V3.3 --* AT4G13330.6)	NA	NA	shared
Solyc11g021260.1	Ycf1 (AHRD V3.3 *-* A0A0U1ZG15_SOLCE)	NA	NA	shared
Solyc11g021270.1	Ycf1 (AHRD V3.3 *-* V5NDV5_9SOLN)	NA	NA	shared
Solyc11g027645.1	Ribosomal RNA small subunit methyltransferase B (AHRD V3.3 --* W9QFJ5_9ROSA)	NA	NA	shared
Solyc11g044610.1	NAD(P)H-quinone oxidoreductase chain 4, chloroplastic (AHRD V3.3 --* NU4C_AGRST)	NA	NA	shared
Solyc11g064957.1	Vacuolar iron transporter like 4 (AHRD V3.3 --* A0A0B2NPW9_GLYSO)	NA	NA	shared
Solyc11g072760.1	Chitinase (AHRD V3.3 *** G7KL79_MEDTR)	NA	NA	shared
Solyc12g009925.1	Glutamyl-tRNA reductase 2, chloroplastic (AHRD V3.3 --* HEM12_ARATH)	NA	NA	shared
Solyc12g010310.2	Zinc finger CCCH domain-containing protein 32 (AHRD V3.3 --* C3H32_ORYSJ)	NA	NA	shared
Solyc12g017268.1	Sec23/Sec24 protein transport family protein (AHRD V3.3 --* AT4G14160.2)	NA	NA	shared
Solyc12g019370.1	LOW QUALITY:Movement protein (AHRD V3.3 *-* A0A151UGG0_CAJCA)	NA	NA	shared
Solyc12g021160.1	LOW QUALITY:cysteine-rich RLK (RECEPTOR-like protein kinase) 29 (AHRD V3.3 --* AT4G21410.3)	NA	NA	shared
Solyc12g035875.1	30S ribosomal protein S3, chloroplastic (AHRD V3.3 --* RR3_ACOCL)	NA	NA	shared
Solyc12g038350.2	UDP-glucose 6-dehydrogenase 1 (AHRD V3.3 --* UGDH1_SOYBN)	NA	NA	shared
Solyc12g038570.2	Clathrin assembly family protein (AHRD V3.3 *-* B9IKX9_POPTR)	NA	NA	shared
Solyc12g042100.2	RING/FYVE/PHD zinc finger superfamily protein (AHRD V3.3 --* AT1G43770.3)	NA	NA	shared
Solyc12g042120.2	potassium transporter 2 (AHRD V3.3 --* AT2G40540.5)	NA	NA	shared
sly-MIR156a	NA	NA	NA	shared
Solyc04g009435.1	NAC domain protein (AHRD V3.3 *** Q6RH27_SOLLC)	AT1G01720	NAC (No Apical Meristem) domain transcriptional regulator superfamily protein	shared
Solyc02g036430.2	NAC domain protein, (AHRD V3.3 *** A0A061EDT4_THECC)	AT1G65910	NAC domain containing protein 28	shared
Solyc10g083450.2	NAC domain protein (AHRD V3.3 *** A0JBY8_9ASPA)	AT1G77450	NAC domain containing protein 32	shared
Solyc02g086770.3	Cinnamoyl-CoA reductase (AHRD V3.3 *** A0A172WBP6_DAUCA)	AT5G14700	NAD(P)-binding Rossmann-fold superfamily protein	shared
Solyc06g083470.3	NAD(P)-binding Rossmann-fold superfamily protein (AHRD V3.3 *** AT5G06060.1),Pfam:PF13561	AT5G06060	NAD(P)-binding Rossmann-fold superfamily protein	shared
Solyc10g086390.2	NAD(P)-binding Rossmann-fold superfamily protein (AHRD V3.3 *** AT5G02540.1)	AT5G02540	NAD(P)-binding Rossmann-fold superfamily protein	shared
Solyc01g017210.1	NAD(P)H-quinone oxidoreductase subunit 3, chloroplastic (AHRD V3.3 *** NU3C_LEMMI)	ATCG00440	NADH:ubiquinone/plastoquinone oxidoreductase, chain 3 protein	shared
Solyc02g037540.2	Disease resistance protein (AHRD V3.3 *** W9R405_9ROSA)	AT4G27220	NB-ARC domain-containing disease resistance protein	shared
Solyc06g008770.2	CNL4	AT3G46730	NB-ARC domain-containing disease resistance protein	shared
Solyc06g075510.3	APETALA2e	AT3G45650	nitrate excretion transporter1	shared
Solyc01g100850.3	ABC transporter family protein (AHRD V3.3 *** A0A097P9U5_HEVBR)	AT5G02270	non-intrinsic ABC protein 9	shared
Solyc02g093330.3	Nuclear pore complex Nup98-Nup96 (AHRD V3.3 *-* A0A0B0NED3_GOSAR)	AT1G10390	Nucleoporin autopeptidase	shared
Solyc01g095930.3	O-acyltransferase WSD1-like protein (AHRD V3.3 *** A0A0B0P708_GOSAR)	AT5G53390	O-acyltransferase (WSD1-like) family protein	shared
Solyc07g053890.3	O-acyltransferase WSD1 (AHRD V3.3 *** A0A151TQI5_CAJCA)	AT3G49190	O-acyltransferase (WSD1-like) family protein	shared
Solyc10g078510.2	Glucan endo-1,3-beta-glucosidase, putative (AHRD V3.3 *** B9SHH6_RICCO)	AT1G64760	O-Glycosyl hydrolases family 17 protein	shared
Solyc12g041960.2	O-methyltransferase (AHRD V3.3 *** A0A1B4Z3W3_9ROSA)	AT4G35160	O-methyltransferase family protein	shared
Solyc07g008920.3	Oxysterol-binding protein-like (AHRD V3.3 *** A0A0K9NXU5_ZOSMR)	AT5G57240	OSBP(oxysterol binding protein)-related protein 4C	shared
Solyc06g005475.1	Outer envelope pore protein 16, chloroplastic (AHRD V3.3 *-* A0A0K9PH60_ZOSMR)	AT2G28900	outer plastid envelope protein 16-1	shared
Solyc02g031940.2	Pathogen-like protein (AHRD V3.3 *** A0A172WBY3_NICBE)	AT1G78780	pathogenesis-related family protein	shared
Solyc03g026050.3	Terminal flower 1 (AHRD V3.3 *** G7ZV36_MEDTR)	AT5G62040	PEBP (phosphatidylethanolamine-binding protein) family protein	shared
Solyc01g079130.2	Pectin lyase-like superfamily protein (AHRD V3.3 *** AT1G02460.1)	AT1G02460	Pectin lyase-like superfamily protein	shared
Solyc10g007520.2	Pentatricopeptide repeat-containing protein (AHRD V3.3 *** A0A118K158_CYNCS)	AT3G14580	Pentatricopeptide repeat (PPR) superfamily protein	shared
Solyc10g079840.2	Peptide chain release factor 2 (AHRD V3.3 *** A0A0B0MIC9_GOSAR)	AT3G57190	peptide chain release factor, putative	shared
Solyc06g082040.2	PHD finger transcription factor (AHRD V3.3 *-* AT5G58610.3)	AT5G58610	PHD finger transcription factor, putative	shared
Solyc09g007910.3	Phenylalanine ammonia-lyase (AHRD V3.3 *** PAL5_SOLLC)	AT2G37040	PHE ammonia lyase 1	shared
Solyc03g121420.3	Inorganic pyrophosphatase 2 (AHRD V3.3 *** A0A0B2S4R2_GLYSO)	AT1G73010	phosphate starvation-induced gene 2	shared
Solyc02g086650.3	Phosphoenolpyruvate/phosphate translocator (AHRD V3.3 *** A0A0D3QJC6_CAMSI)	AT3G01550	phosphoenolpyruvate (pep)/phosphate translocator 2	shared
Solyc04g006970.3	Phosphoenolpyruvate carboxylase (AHRD V3.3 *** A6YM33_RICCO)	AT1G68750	phosphoenolpyruvate carboxylase 4	shared
Solyc04g072605.1	ATP-dependent 6-phosphofructokinase (AHRD V3.3 *** K4BTP5_SOLLC)	AT4G26270	phosphofructokinase 3	shared
Solyc02g082630.2	Phosphoinositide phosphatase SAC1 (AHRD V3.3 *-* G7K029_MEDTR)	AT5G66020	Phosphoinositide phosphatase family protein	shared
Solyc02g082770.3	Phosphoinositide phosphatase family protein (AHRD V3.3 *-* AT3G51460.1)	AT3G51460	Phosphoinositide phosphatase family protein	shared
Solyc07g014730.3	Phospholipase A2 (AHRD V3.3 *** Q5CCT8_TOBAC)	AT2G06925	Phospholipase A2 family protein	shared
Solyc09g064580.2	photosystem II reaction center protein M (AHRD V3.3 *** ATCG00220.1)	ATCG00220	photosystem II reaction center protein M	shared
Solyc01g098820.3	Phototropic-responsive NPH3 family protein, putative (AHRD V3.3 *** A0A061FBG1_THECC)	AT5G10250	Phototropic-responsive NPH3 family protein	shared
Solyc02g092610.3	Phototropic-responsive NPH3 family protein (AHRD V3.3 *-* AT5G67385.5)	AT5G67385	Phototropic-responsive NPH3 family protein	shared
Solyc03g031860.3	Phytoene synthase 1	AT5G17230	PHYTOENE SYNTHASE	shared
Solyc01g057480.2	PIF1 helicase (AHRD V3.3 *-* G7J5Q6_MEDTR)	AT5G28780	PIF1 helicase	shared
Solyc09g005730.3	Plant protein 1589 of unknown function (AHRD V3.3 *** AT3G55240.1)	AT3G55240	Plant protein 1589 of unknown function	shared
Solyc06g072730.3	WEB family protein, chloroplastic (AHRD V3.3 *** A0A0B2RLR4_GLYSO)	AT5G16730	Plant protein of unknown function (DUF827)	shared
Solyc01g081640.3	DUF936 family protein (AHRD V3.3 *** A2Q3C0_MEDTR)	AT2G31920	Plant protein of unknown function (DUF936)	shared
Solyc01g104320.3	Plastid-lipid associated protein PAP / fibrillin family protein (AHRD V3.3 *-* A0A061DXD4_THECC)	AT3G26070	Plastid-lipid associated protein PAP / fibrillin family protein	shared
Solyc11g005340.2	Plastid-lipid associated protein PAP / fibrillin family protein (AHRD V3.3 *** AT5G09820.2)	AT5G09820	Plastid-lipid associated protein PAP / fibrillin family protein	shared
Solyc03g044625.1	PLATZ transcription factor family protein (AHRD V3.3 *** AT4G17900.2)	AT4G17900	PLATZ transcription factor family protein	shared
Solyc05g005720.3	Potassium transporter family protein (AHRD V3.3 *** AT1G60160.1)	AT1G60160	Potassium transporter family protein	shared
Solyc05g016420.1	Protein phosphatase 2C family protein (AHRD V3.3 *** AT4G28400.2)	AT2G20630	PP2C induced by AVRRPM1	shared
Solyc01g110960.3	Prefoldin chaperone subunit family protein, putative (AHRD V3.3 *** A0A061F1S1_THECC)	AT5G27330	Prefoldin chaperone subunit family protein	shared
Solyc01g095550.2	LOW QUALITY:Protein kinase family protein (AHRD V3.3 *** AT5G41730.2)	AT5G41730	Protein kinase family protein	shared
Solyc01g111570.3	Kinase family protein (AHRD V3.3 *** B9H1A0_POPTR)	AT2G16750	Protein kinase protein with adenine nucleotide alpha hydrolases-like domain	shared
Solyc04g026230.1	Kinase like protein (AHRD V3.3 *-* O23334_ARATH)	AT4G14780	Protein kinase superfamily protein	shared
Solyc04g026235.1	Kinase family protein (AHRD V3.3 *** B9GH93_POPTR)	AT3G01490	Protein kinase superfamily protein	shared
Solyc06g007355.1	LOW QUALITY:Protein kinase (AHRD V3.3 *-* A0A0K9NJ18_ZOSMR)	AT4G31170	Protein kinase superfamily protein	shared
Solyc06g083500.3	Kinase family protein (AHRD V3.3 *** D7L628_ARALL)	AT3G07070	Protein kinase superfamily protein	shared
Solyc09g083260.3	Ion channel pollux-like protein (AHRD V3.3 *** A0A072VLS8_MEDTR)	AT5G43745	Protein of unknown function (DUF1012)	shared
Solyc06g051680.1	Protein EARLY FLOWERING 4 (AHRD V3.3 *-* A0A0B2RPG0_GLYSO)	AT2G40080	Protein of unknown function (DUF1313)	shared
Solyc03g065200.3	DUF1336 family protein (AHRD V3.3 *-* G7L343_MEDTR)	AT3G29180	Protein of unknown function (DUF1336)	shared
Solyc06g054310.1	LOW QUALITY:Fantastic four-like protein (AHRD V3.3 *** G7IE53_MEDTR)	AT5G19260	Protein of unknown function (DUF3049)	shared
Solyc06g074270.1	LOW QUALITY:FANTASTIC four-like protein (DUF3049) (AHRD V3.3 *-* AT5G22390.1)	AT5G22390	Protein of unknown function (DUF3049)	shared
Solyc06g062795.1	LOW QUALITY:DUF3511 domain protein (AHRD V3.3 --* G7LI91_MEDTR)	AT5G11970	Protein of unknown function (DUF3511)	shared
Solyc08g081680.2	Protein LURP-one-related 17 (AHRD V3.3 *** A0A0B2R169_GLYSO)	AT5G41590	Protein of unknown function (DUF567)	shared
Solyc03g078650.3	Lipase (AHRD V3.3 *** G7JAK3_MEDTR)	AT5G05840	Protein of unknown function (DUF620)	shared
Solyc04g009980.3	LIGHT-DEPENDENT SHORT HYPOCOTYLS-like protein (DUF640) (AHRD V3.3 *** AT1G07090.1)	AT1G07090	Protein of unknown function (DUF640)	shared
Solyc12g096310.2	plant/protein (Protein of unknown function, DUF599) (AHRD V3.3 *** AT5G10580.4)	AT4G31330	Protein of unknown function, DUF599	shared
Solyc01g111790.2	Serine/threonine protein phosphatase 2A regulatory subunit B (AHRD V3.3 *** B9IFU5_POPTR)	AT5G25510	Protein phosphatase 2A regulatory B subunit family protein	shared
Solyc03g096670.3	Protein phosphatase 2C (AHRD V3.3 *** Q8RVG0_TOBAC)	AT3G11410	protein phosphatase 2CA	shared
Solyc03g081240.3	Two-component response regulator-like protein (AHRD V3.3 *** W9RA17_9ROSA)	AT5G24470	pseudo-response regulator 5	shared
Solyc03g098010.3	phosphate starvation inducible gene TPSI1	AT3G17790	purple acid phosphatase 17	shared
Solyc04g056380.3	Seipin (AHRD V3.3 *** A0A0B0N0V2_GOSAR)	AT5G16460	Putative adipose-regulatory protein (Seipin)	shared
Solyc10g084150.2	Cytokinin riboside 5'-monophosphate phosphoribohydrolase (AHRD V3.3 *** I0IUQ2_SOLLC)	AT2G28305	Putative lysine decarboxylase family protein	shared
Solyc09g008840.3	Pyruvate kinase family protein (AHRD V3.3 *** AT3G52990.1)	AT3G52990	Pyruvate kinase family protein	shared
Solyc01g096220.3	Ras-related protein RABA3 (AHRD V3.3 *** A0A0B2Q7Y9_GLYSO)	AT1G01200	RAB GTPase homolog A3	shared
Solyc10g052470.1	Myb family transcription factor family protein (AHRD V3.3 *** B9H0R6_POPTR)	AT4G39250	RAD-like 1	shared
Solyc01g109690.1	MYB transcription factor (AHRD V3.3 *** F2WZH1_VITPS)	AT1G75250	RAD-like 6	shared
Solyc02g071790.2	Leucine-rich repeat receptor-like protein kinase (AHRD V3.3 *-* C0LGM8_ARATH)	AT3G23120	receptor like protein 38	shared
Solyc01g099430.3	ATP-dependent DNA helicase (AHRD V3.3 --* C1N4S4_MICPC)	AT5G27680	RECQ helicase SIM	shared
Solyc01g099480.3	RecQ family ATP-dependent DNA helicase (AHRD V3.3 *-* G7I8P0_MEDTR)	AT5G27680	RECQ helicase SIM	shared
Solyc05g052950.3	Regulator of chromosome condensation (RCC1) family protein (AHRD V3.3 *** AT3G55580.1)	AT3G55580	Regulator of chromosome condensation (RCC1) family protein	shared
Solyc09g011160.3	Regulator of chromosome condensation (RCC1) family protein (AHRD V3.3 *** AT3G53830.3)	AT3G53830	Regulator of chromosome condensation (RCC1) family protein	shared
Solyc06g066690.3	Regulator of Vps4 activity in the MVB pathway protein, putative (AHRD V3.3 *-* A0A061GBK3_THECC)	AT1G79910	Regulator of Vps4 activity in the MVB pathway protein	shared
Solyc03g114440.1	Ethylene-responsive transcription factor (AHRD V3.3 *-* W9SE25_9ROSA)	AT5G19790	related to AP2 11	shared
Solyc04g005470.3	Remorin family protein (AHRD V3.3 *-* AT1G13920.4)	AT1G13920	Remorin family protein	shared
Solyc04g015520.3	Remorin family protein (AHRD V3.3 *** A0A061F452_THECC)	AT3G57540	Remorin family protein	shared
Solyc05g014710.3	Remorin family protein (AHRD V3.3 *** A0A061E752_THECC)	AT1G67590	Remorin family protein	shared
Solyc11g011310.2	Rhamnogalacturonate lyase family protein (AHRD V3.3 *** AT2G22620.2)	AT2G22620	Rhamnogalacturonate lyase family protein	shared
Solyc01g094610.3	Rop guanine nucleotide exchange factor, putative (AHRD V3.3 *** B9RDS3_RICCO)	AT4G00460	RHO guanyl-nucleotide exchange factor 3	shared
Solyc11g027775.1	40S ribosomal protein S5 (AHRD V3.3 *-* RS5_NICPL)	AT3G11940	ribosomal protein 5A	shared
Solyc03g058210.2	50S ribosomal protein L14, chloroplastic (AHRD V3.3 *** RK14_TOBAC)	ATCG00780	ribosomal protein L14	shared
Solyc03g058213.1	50S ribosomal protein L16, chloroplastic (AHRD V3.3 *** RK16_GUIAB)	ATCG00790	ribosomal protein L16	shared
Solyc02g011985.1	50S ribosomal protein L2, chloroplastic (AHRD V3.3 *** RK2_WHEAT)	ATCG01310	ribosomal protein L2	shared
Solyc05g023730.1	LOW QUALITY:50S ribosomal protein L2, chloroplastic (AHRD V3.3 *-* RK2_SOLBU)	ATCG01310	ribosomal protein L2	shared
Solyc06g009985.1	LOW QUALITY:50S ribosomal protein L2, chloroplastic (AHRD V3.3 *-* A0A0N7BD77_CORYI)	ATCG01310	ribosomal protein L2	shared
Solyc10g018610.1	50S ribosomal protein L2, chloroplastic (AHRD V3.3 *-* RK2_TOBAC)	ATCG01310	ribosomal protein L2	shared
Solyc10g047090.2	LOW QUALITY:50S ribosomal protein L2, chloroplastic (AHRD V3.3 *-* RK2_SOLBU)	ATCG01310	ribosomal protein L2	shared
Solyc04g049673.1	50S ribosomal protein L20, chloroplastic (AHRD V3.3 *** RK20_CARPA)	ATCG00660	ribosomal protein L20	shared
Solyc02g011980.1	50S ribosomal protein L23, chloroplastic (AHRD V3.3 *-* A0A190LKY7_9MAGN)	ATCG01300	ribosomal protein L23	shared
Solyc12g033030.1	50S ribosomal protein L23, chloroplastic (AHRD V3.3 *** RK23_ATRBE)	ATCG01300	ribosomal protein L23	shared
Solyc12g033090.2	50S ribosomal protein L23, chloroplastic (AHRD V3.3 *** RK23_ATRBE)	ATCG01300	ribosomal protein L23	shared
Solyc05g008840.2	RING/U-box superfamily protein (AHRD V3.3 *** AT1G73760.1)	AT1G73760	RING/U-box superfamily protein	shared
Solyc07g055330.3	RING/U-box superfamily protein, putative (AHRD V3.3 *** A0A061ECA4_THECC)	AT3G58720	RING/U-box superfamily protein	shared
Solyc11g005310.1	RING/U-box superfamily protein (AHRD V3.3 *** AT1G49230.1)	AT1G49230	RING/U-box superfamily protein	shared
Solyc12g007320.1	RING/U-box superfamily protein (AHRD V3.3 *** AT4G28890.1)	AT4G28890	RING/U-box superfamily protein	shared
Solyc02g088117.1	RNA-binding KH domain-containing protein (AHRD V3.3 *-* AT5G15270.3)	AT5G15270	RNA-binding KH domain-containing protein	shared
Solyc01g095190.2	LOW QUALITY:S-adenosyl-L-methionine-dependent methyltransferases superfamily protein (AHRD V3.3 *** AT4G01240.1)	AT4G01240	S-adenosyl-L-methionine-dependent methyltransferases superfamily protein	shared
Solyc04g063210.3	Caffeoyl-CoA O-methyltransferase (AHRD V3.3 *** CAMT_MESCR)	AT4G26220	S-adenosyl-L-methionine-dependent methyltransferases superfamily protein	shared
Solyc02g079550.2	Serine/threonine-protein kinase (AHRD V3.3 *** B9H1U5_POPTR)	AT1G11330	S-locus lectin protein kinase family protein	shared
Solyc01g110970.3	Auxin responsive SAUR protein (AHRD V3.3 *-* A0A103Y0W3_CYNCS)	AT4G38840	SAUR-like auxin-responsive protein family	shared
Solyc05g056430.2	Small auxin up-regulated RNA56	AT5G53590	SAUR-like auxin-responsive protein family	shared
Solyc08g079150.1	SAUR-like auxin-responsive protein family (AHRD V3.3 *** AT4G22620.1)	AT4G22620	SAUR-like auxin-responsive protein family	shared
Solyc01g005290.3	Sec14p-like phosphatidylinositol transfer family protein (AHRD V3.3 *-* AT1G14820.3)	AT1G14820	Sec14p-like phosphatidylinositol transfer family protein	shared
Solyc01g005295.1	Sec14p-like phosphatidylinositol transfer family protein (AHRD V3.3 *-* AT1G14820.3)	AT1G14820	Sec14p-like phosphatidylinositol transfer family protein	shared
Solyc08g078680.3	Sec14p-like phosphatidylinositol transfer family protein (AHRD V3.3 *** AT5G47510.4)	AT5G47510	Sec14p-like phosphatidylinositol transfer family protein	shared
Solyc10g005740.2	Sec14p-like phosphatidylinositol transfer family protein (AHRD V3.3 *** AT1G55690.5)	AT1G55690	Sec14p-like phosphatidylinositol transfer family protein	shared
Solyc12g008460.2	Senescence/dehydration-associated protein-like protein (AHRD V3.3 *** AT4G15450.1)	AT4G15450	Senescence/dehydration-associated protein-related	shared
Solyc11g005230.1	LOW QUALITY:Protein SENSITIVITY TO RED LIGHT REDUCED 1 (AHRD V3.3 *** SRR1_ARATH)	AT5G59560	sensitivity to red light reduced protein (SRR1)	shared
Solyc07g008500.1	Histone-lysine N-methyltransferase (AHRD V3.3 *-* A0A0K9P7Y1_ZOSMR)	AT1G76710	SET domain group 26	shared
Solyc01g087690.2	Sigma factor (AHRD V3.3 *** A0A0G2STQ4_9ROSI)	AT5G13730	sigma factor 4	shared
Solyc03g007370.3	Sigma factor (AHRD V3.3 *** A0A0G2STU5_9ROSI)	AT5G24120	sigma factor E	shared
Solyc05g005280.3	Poly [ADP-ribose] polymerase (AHRD V3.3 *** K4BW59_SOLLC)	AT1G23550	similar to RCD one 2	shared
Solyc09g055940.3	Sodium Bile acid symporter family (AHRD V3.3 *** AT3G25410.1)	AT3G25410	Sodium Bile acid symporter family	shared
Solyc08g060920.3	IDS4-like	AT5G20150	SPX domain gene 1	shared
Solyc07g053810.3	Squamosa promoter binding protein 4	AT2G33810	squamosa promoter binding protein-like 3	shared
Solyc11g039530.1	LOW QUALITY:30S ribosomal protein S3, chloroplastic (AHRD V3.3 *-* RR3_SOLTU)	ATCG00800	structural constituent of ribosome	shared
Solyc12g035880.1	30S ribosomal protein S3, chloroplastic (AHRD V3.3 *-* RR3_SOLTU)	ATCG00800	structural constituent of ribosome	shared
Solyc08g079970.1	Subtilisin-like protease (AHRD V3.3 *** Q9LWA3_SOLLC)	AT1G04110	Subtilase family protein	shared
Solyc04g081810.3	Subtilisin-like protease (AHRD V3.3 *** A0A0B2PIS0_GLYSO)	AT1G20160	Subtilisin-like serine endopeptidase family protein	shared
Solyc09g092130.3	Sucrose-phosphate synthase (AHRD V3.3 *** A0A0U1ZVB4_LYCBA)	AT1G04920	sucrose phosphate synthase 3F	shared
Solyc03g006550.3	Terpene synthase (AHRD V3.3 *** A0A076GH23_POPTR)	AT1G61120	terpene synthase 04	shared
Solyc12g006530.2	Terpene cyclase/mutase family member (AHRD V3.3 *** M1BMW3_SOLTU)	AT1G78950	Terpenoid cyclases family protein	shared
Solyc06g068130.3	Tetratricopeptide repeat (TPR)-like superfamily protein (AHRD V3.3 *-* AT5G20190.1)	AT5G20190	Tetratricopeptide repeat (TPR)-like superfamily protein	shared
Solyc08g076730.3	Tetratricopeptide repeat (TPR)-like superfamily protein (AHRD V3.3 *** AT4G17940.1)	AT4G17940	Tetratricopeptide repeat (TPR)-like superfamily protein	shared
Solyc09g064630.3	Tetratricopeptide repeat (TPR)-like superfamily protein (AHRD V3.3 *-* AT4G17940.1)	AT4G17940	Tetratricopeptide repeat (TPR)-like superfamily protein	shared
Solyc05g006830.3	Thioredoxin family protein (AHRD V3.3 *** B9IJS4_POPTR)	AT5G39950	thioredoxin 2	shared
Solyc06g075650.3	tonoplast intrinsic protein 1.2	AT4G01470	tonoplast intrinsic protein 1;3	shared
Solyc02g066980.1	LOW QUALITY:TPX2 (targeting protein for Xklp2) protein family (AHRD V3.3 *** AT5G15510.1)	AT3G01015	TPX2 (targeting protein for Xklp2) protein family	shared
Solyc08g065830.3	Transcription factor jumonji (jmjC) domain-containing protein (AHRD V3.3 *-* AT3G07610.1)	AT3G07610	Transcription factor jumonji (jmjC) domain-containing protein	shared
Solyc09g005610.3	transcription factor-like protein (AHRD V3.3 *** AT1G58330.1)	AT1G58330	transcription factor-related	shared
Solyc10g085210.2	transcription factor-like protein (AHRD V3.3 *** AT1G58330.1)	AT1G58330	transcription factor-related	shared
Solyc01g109120.3	Transducin/WD40 repeat-like superfamily protein (AHRD V3.3 *** AT3G18950.1)	AT3G18950	Transducin/WD40 repeat-like superfamily protein	shared
Solyc04g072890.3	Transducin/WD40 repeat protein (AHRD V3.3 *-* G8A379_MEDTR)	AT1G78070	Transducin/WD40 repeat-like superfamily protein	shared
Solyc04g072895.1	Transducin/WD40 repeat-like superfamily protein (AHRD V3.3 *** AT1G78070.1)	AT1G78070	Transducin/WD40 repeat-like superfamily protein	shared
Solyc04g076720.2	WD repeat domain phosphoinositide-interacting 3 (AHRD V3.3 *-* A0A0B0P0U0_GOSAR)	AT3G62770	Transducin/WD40 repeat-like superfamily protein	shared
Solyc05g024160.3	Pyruvate dehydrogenase E1 component subunit beta (AHRD V3.3 *** B6T6H3_MAIZE)	AT5G50850	Transketolase family protein	shared
Solyc03g071650.2	LOW QUALITY:TRICHOME BIREFRINGENCE-LIKE 11 (AHRD V3.3 *-* AT5G19160.2)	AT5G19160	TRICHOME BIREFRINGENCE-LIKE 11	shared
Solyc03g006220.3	Trichome birefringence-like protein (AHRD V3.3 *** G7IKB9_MEDTR)	AT1G29050	TRICHOME BIREFRINGENCE-LIKE 38	shared
Solyc04g049340.3	Tryptophan/tyrosine permease (AHRD V3.3 *** A0A061FPP3_THECC)	AT5G19500	Tryptophan/tyrosine permease	shared
Solyc05g053400.2	Glycosyltransferase (AHRD V3.3 *** A0A0A1WC49_NICAT)	AT3G50740	UDP-glucosyl transferase 72E1	shared
Solyc05g006140.1	Glycosyltransferase (AHRD V3.3 *** A0A068TY11_COFCA)	AT1G24100	UDP-glucosyl transferase 74B1	shared
Solyc04g008330.1	Glycosyltransferase (AHRD V3.3 *** M1CVU0_SOLTU)	AT2G31750	UDP-glucosyl transferase 74D1	shared
Solyc09g092490.3	Glycosyltransferase (AHRD V3.3 *-* B6EWX4_LYCBA)	AT1G05530	UDP-glucosyl transferase 75B2	shared
Solyc10g085230.2	ripening-related mRNA 1b	AT5G59580	UDP-glucosyl transferase 76E1	shared
Solyc04g074330.3	Glycosyltransferase (AHRD V3.3 *** K4BTX1_SOLLC)	AT1G22380	UDP-glucosyl transferase 85A3	shared
Solyc01g105350.2	Glycosyltransferase (AHRD V3.3 *** K4B2A5_SOLLC)	AT1G22340	UDP-glucosyl transferase 85A7	shared
Solyc02g088517.1	Glycosyltransferase (AHRD V3.3 *** A0A022RUH0_ERYGU)	AT3G16520	UDP-glucosyl transferase 88A1	shared
Solyc07g043490.1	UDP-Gal:Tomatidine Galactosyltransferase	AT2G15490	UDP-glycosyltransferase 73B4	shared
Solyc01g006670.2	Glycosyltransferase (AHRD V3.3 *** K4D910_SOLLC)	AT5G12890	UDP-Glycosyltransferase superfamily protein	shared
Solyc02g063000.3	Glycosyltransferase (AHRD V3.3 *** K4B6I8_SOLLC)	AT2G18570	UDP-Glycosyltransferase superfamily protein	shared
Solyc04g016200.1	Glycosyltransferase (AHRD V3.3 *** Q8RXA4_SOLLC)	AT2G36780	UDP-Glycosyltransferase superfamily protein	shared
Solyc05g053890.2	Glycosyltransferase (AHRD V3.3 *** K4C268_SOLLC)	AT2G36780	UDP-Glycosyltransferase superfamily protein	shared
Solyc07g043500.1	Glycosyltransferase (AHRD V3.3 *** K4CEK8_SOLLC)	AT5G49690	UDP-Glycosyltransferase superfamily protein	shared
Solyc09g059170.2	Glycosyltransferase (AHRD V3.3 *** M1C989_SOLTU)	AT5G54010	UDP-Glycosyltransferase superfamily protein	shared
Solyc10g085870.1	Glycosyltransferase (AHRD V3.3 *** M1BFM3_SOLTU)	AT2G36780	UDP-Glycosyltransferase superfamily protein	shared
Solyc11g066670.1	Glycosyltransferase (AHRD V3.3 *** K4D9S4_SOLLC)	AT2G36770	UDP-Glycosyltransferase superfamily protein	shared
Solyc11g012590.2	CASP-like protein (AHRD V3.3 *** M1B0Y6_SOLTU)	AT2G35760	Uncharacterised protein family (UPF0497)	shared
Solyc01g104780.3	Vacuolar iron transporter family protein (AHRD V3.3 *** A0A061DXK2_THECC)	AT3G43660	Vacuolar iron transporter (VIT) family protein	shared
Solyc04g051540.3	WRKY transcription factor 13	AT4G39410	WRKY DNA-binding protein 13	shared
Solyc01g058540.3	WRKY transcription factor 47	AT2G47260	WRKY DNA-binding protein 23	shared
Solyc10g084380.1	WRKY transcription factor 44	AT2G37260	WRKY family transcription factor family protein	shared
Solyc11g066270.2	xyloglucan endotransglucosylase-hydrolase 6	AT2G36870	xyloglucan endotransglucosylase/hydrolase 32	shared
Solyc01g009550.1	LOW QUALITY:Ycf1 (AHRD V3.3 *-* A0A0U1ZK62_SOLHA)	ATCG01130	Ycf1 protein	shared
Solyc01g020200.1	LOW QUALITY:Ycf1 (AHRD V3.3 *-* A0A0C5C9W8_SOLLC)	ATCG01130	Ycf1 protein	shared
Solyc02g011820.2	Ycf1 (AHRD V3.3 *-* A0A0C5C9W8_SOLLC)	ATCG01130	Ycf1 protein	shared
Solyc02g011850.2	Ycf1 (AHRD V3.3 *-* A0A0U1ZHZ0_9SOLN)	ATCG01130	Ycf1 protein	shared
Solyc04g045540.1	Ycf1 (AHRD V3.3 *** A0A168RD69_SOLME)	ATCG01000	Ycf1 protein	shared
Solyc04g045550.1	LOW QUALITY:Ycf1 (AHRD V3.3 *-* A0A0U1ZG15_SOLCE)	ATCG01130	Ycf1 protein	shared
Solyc05g016220.1	LOW QUALITY:Ycf1 (AHRD V3.3 *-* A0A0U1ZJ99_SOLCI)	ATCG01130	Ycf1 protein	shared
Solyc05g047440.1	LOW QUALITY:Ycf1 protein (AHRD V3.3 *-* ATCG01130.1)	ATMG00370	Ycf1 protein	shared
Solyc07g041680.2	LOW QUALITY:Ycf1 (AHRD V3.3 *-* A0A0N7CFU2_SOLTU)	ATCG01130	Ycf1 protein	shared
Solyc08g016000.1	LOW QUALITY:Ycf1 (AHRD V3.3 *-* A0A0U1ZJ99_SOLCI)	ATCG01130	Ycf1 protein	shared
Solyc10g018580.1	LOW QUALITY:Ycf1 (AHRD V3.3 *-* A0A0U1ZK62_SOLHA)	ATCG01130	Ycf1 protein	shared
Solyc10g049470.1	Ycf1 (AHRD V3.3 *-* A0A0U1ZJ99_SOLCI)	ATCG01130	Ycf1 protein	shared
Solyc10g062330.1	Ycf1 (AHRD V3.3 *-* A0A0N7CFU2_SOLTU)	ATCG01000	Ycf1 protein	shared
Solyc11g021240.2	Ycf1 (AHRD V3.3 *-* A0A0U1ZHZ0_9SOLN)	ATCG01130	Ycf1 protein	shared
Solyc11g021280.1	Ycf1 (AHRD V3.3 *-* A0A0U1ZJ99_SOLCI)	ATCG01130	Ycf1 protein	shared
Solyc11g021290.2	Ycf1 (AHRD V3.3 *-* A0A0U1ZK62_SOLHA)	ATCG01130	Ycf1 protein	shared
Solyc11g021300.1	LOW QUALITY:Ycf1 (AHRD V3.3 *-* A0A0U1ZG15_SOLCE)	ATCG01130	Ycf1 protein	shared
Solyc11g021310.1	Ycf1 (AHRD V3.3 *-* A0A0U1ZKJ5_SOLPI)	ATCG01130	Ycf1 protein	shared
Solyc11g044670.1	Ycf1 protein (AHRD V3.3 *-* ATCG01130.1)	ATCG01000	Ycf1 protein	shared
Solyc11g044680.2	Ycf1 (AHRD V3.3 *-* A0A140G1X7_TOBAC)	ATCG01130	Ycf1 protein	shared
Solyc11g044690.1	Ycf1 (AHRD V3.3 *-* A0A0N7CKU9_SOLNI)	ATCG01130	Ycf1 protein	shared
Solyc12g035550.1	LOW QUALITY:Ycf1 (AHRD V3.3 *-* A0A0U1ZJ99_SOLCI)	ATCG01130	Ycf1 protein	shared
Solyc12g036550.2	Ycf1 (AHRD V3.3 *** A0A0U1ZFC2_SOLCI)	ATCG01000	Ycf1 protein	shared
Solyc01g007830.2	Condensin complex subunit 2 (AHRD V3.3 --* CND2_ARATH)	AT2G32590	NA	uniq in slsdg34
Solyc02g092180.1	LOW QUALITY:cell division cycle 48C (AHRD V3.3 --* AT3G01610.2)	AT5G65925	NA	uniq in slsdg34
Solyc04g016420.3	Mediator of RNA polymerase II transcription subunit 23 (AHRD V3.3 *-* A0A061EVL7_THECC)	AT5G04000	NA	uniq in slsdg34
Solyc04g051720.2	LOW QUALITY:transmembrane protein (AHRD V3.3 *** AT5G64820.1)	AT5G64820	NA	uniq in slsdg34
Solyc04g080270.3	Cytochrome c oxidase subunit 3 (AHRD V3.3 *** A0A0B0MIX5_GOSAR)	AT5G42710	NA	uniq in slsdg34
Solyc07g008430.2	RING/U-box superfamily protein (AHRD V3.3 --* AT3G56580.3)	AT5G57123	NA	uniq in slsdg34
Solyc08g075150.3	Coiled-coil domain-containing 73 (AHRD V3.3 *** A0A0B0NIE5_GOSAR)	AT5G45310	NA	uniq in slsdg34
Solyc09g010540.3	dentin sialophosphoprotein-like protein (AHRD V3.3 *-* AT5G02520.2)	AT5G02520	NA	uniq in slsdg34
Solyc09g010550.3	SANTA (SANT associated) protein (AHRD V3.3 *-* A0A072VWG5_MEDTR)	AT5G02520	NA	uniq in slsdg34
Solyc09g090300.3	DCTP pyrophosphatase 1 (AHRD V3.3 *** A0A061ENZ8_THECC)	AT3G25400	NA	uniq in slsdg34
Solyc06g066860.1	2-oxoglutarate-dependent dioxygenase-related family protein (AHRD V3.3 *** B9GL08_POPTR)	AT1G52820	2-oxoglutarate (2OG) and Fe(II)-dependent oxygenase superfamily protein	uniq in slsdg34
Solyc08g006560.3	3-ketoacyl-acyl carrier protein synthase III (AHRD V3.3 *** AT1G62640.2)	AT1G62640	3-ketoacyl-acyl carrier protein synthase III	uniq in slsdg34
Solyc06g053900.3	3-ketoacyl-CoA synthase (AHRD V3.3 *** K4C677_SOLLC)	AT2G26640	3-ketoacyl-CoA synthase 11	uniq in slsdg34
Solyc01g060200.2	3'-5' exonuclease domain-containing protein (AHRD V3.3 *** A0A103XRN2_CYNCS)	AT2G25910	3'-5' exonuclease domain-containing protein / K homology domain-containing protein / KH domain-containing protein	uniq in slsdg34
Solyc02g077140.3	Alpha/beta-Hydrolases superfamily protein (AHRD V3.3 *** A0A061GF41_THECC)	AT4G18550	alpha/beta-Hydrolases superfamily protein	uniq in slsdg34
Solyc01g097220.2	ankyrin repeat family protein (AHRD V3.3 *** AT3G04710.3)	AT3G04710	ankyrin repeat family protein	uniq in slsdg34
Solyc12g096260.2	LOW QUALITY:Ankyrin repeat family protein (AHRD V3.3 *** AT5G07840.1)	AT5G07840	Ankyrin repeat family protein	uniq in slsdg34
Solyc02g080640.3	adenylyl-sulfate reductase	AT4G21990	APS reductase 3	uniq in slsdg34
Solyc03g122050.1	ABC transporter B family-like protein (AHRD V3.3 *-* G7L8C5_MEDTR)	AT3G28860	ATP binding cassette subfamily B19	uniq in slsdg34
Solyc07g021180.2	ATP synthase subunit beta, chloroplastic (AHRD V3.3 *** ATPB_SOLBU)	ATCG00480	ATP synthase subunit beta	uniq in slsdg34
Solyc12g042230.2	ATP synthase subunit beta, chloroplastic (AHRD V3.3 *** ATPB_SOLBU)	ATCG00480	ATP synthase subunit beta	uniq in slsdg34
Solyc09g083360.3	Basic helix-loop-helix (BHLH) family transcription factor (AHRD V3.3 --* A0A0K9PZ13_ZOSMR)	AT5G43650	basic helix-loop-helix (bHLH) DNA-binding superfamily protein	uniq in slsdg34
Solyc11g010620.2	Basic helix loop helix protein, putative (AHRD V3.3 *** A0A072TTF3_MEDTR)	AT4G38070	basic helix-loop-helix (bHLH) DNA-binding superfamily protein	uniq in slsdg34
Solyc09g072583.1	Tubulin beta chain (AHRD V3.3 *-* TBB_HORVU)	AT5G12250	beta-6 tubulin	uniq in slsdg34
Solyc06g072130.3	tonoplast intrinsic protein 3.1	AT1G17810	beta-tonoplast intrinsic protein	uniq in slsdg34
Solyc05g021535.1	calmodulin-binding transcription activator (AHRD V3.3 --* AT3G16940.3)	AT5G64220	Calmodulin-binding transcription activator protein with CG-1 and Ankyrin domains	uniq in slsdg34
Solyc01g099420.2	Catalase (AHRD V3.3 *-* Q6T2D5_SOLTU)	AT4G35090	catalase 2	uniq in slsdg34
Solyc02g090810.3	centrin2 (AHRD V3.3 *** AT3G50360.1)	AT3G50360	centrin2	uniq in slsdg34
Solyc11g022610.1	30S ribosomal protein S4, chloroplastic (AHRD V3.3 *-* RR4_SOLBU)	ATCG00380	chloroplast ribosomal protein S4	uniq in slsdg34
Solyc02g089493.1	CONSTANS protein (AHRD V3.3 *-* C0Z3T8_SOLTU)	AT5G15850	CONSTANS-like 1	uniq in slsdg34
Solyc01g067250.3	cullin 1 (AHRD V3.3 *-* AT4G02570.4)	AT4G02570	cullin 1	uniq in slsdg34
Solyc04g056450.3	Cyclopropane-fatty-acyl-phospholipid synthase (AHRD V3.3 *** AT3G23510.1)	AT3G23510	Cyclopropane-fatty-acyl-phospholipid synthase	uniq in slsdg34
Solyc01g094130.2	Cytochrome P450, putative (AHRD V3.3 *** B9RDF6_RICCO)	AT2G45510	cytochrome P450, family 704, subfamily A, polypeptide 2	uniq in slsdg34
Solyc01g087338.1	LOW QUALITY:Cytochrome P450, putative (AHRD V3.3 *-* A0A061E4E7_THECC)	AT3G14650	cytochrome P450, family 72, subfamily A, polypeptide 11	uniq in slsdg34
Solyc09g064820.1	EID1-like F-box protein 2 (AHRD V3.3 *** A0A0B2NUB4_GLYSO)	AT3G63060	EID1-like 3	uniq in slsdg34
Solyc01g006650.2	ETHYLENE INSENSITIVE 3-like 3 protein (AHRD V3.3 *** A0A0B2RCL4_GLYSO)	AT1G73730	ETHYLENE-INSENSITIVE3-like 3	uniq in slsdg34
Solyc09g091220.2	F-box associated interaction domain-containing protein (AHRD V3.3 *-* A0A103XHT5_CYNCS)	AT3G06240	F-box family protein	uniq in slsdg34
Solyc07g049600.3	Fimbrin, putative (AHRD V3.3 *** B9T216_RICCO)	AT5G35700	fimbrin-like protein 2	uniq in slsdg34
Solyc12g005920.2	Fimbrin-like family protein (AHRD V3.3 *** B9I148_POPTR)	AT5G35700	fimbrin-like protein 2	uniq in slsdg34
Solyc07g007290.1	LOW QUALITY:Flavin-containing monooxygenase (AHRD V3.3 *** A0A022R7T6_ERYGU)	AT1G19250	flavin-dependent monooxygenase 1	uniq in slsdg34
Solyc03g118160.2	falsiflora	AT5G61850	floral meristem identity control protein LEAFY (LFY)	uniq in slsdg34
Solyc09g031880.2	galacturonic acid kinase (AHRD V3.3 *** AT3G10700.3)	AT3G10700	galacturonic acid kinase	uniq in slsdg34
Solyc02g071680.1	GDSL esterase/lipase (AHRD V3.3 *-* A0A172Q426_CITMA)	AT1G29670	GDSL-like Lipase/Acylhydrolase superfamily protein	uniq in slsdg34
Solyc12g056650.2	GIGANTEA (AHRD V3.3 *** F2Z6M2_IPONI)	AT1G22770	gigantea protein (GI)	uniq in slsdg34
Solyc08g080400.1	GRAS family transcription factor (AHRD V3.3 *** A0A061G628_THECC)	AT1G63100	GRAS family transcription factor	uniq in slsdg34
Solyc12g009490.2	Ethylene-responsive transcription factor (AHRD V3.3 *-* W9QRX0_9ROSA)	AT5G25390	Integrase-type DNA-binding superfamily protein	uniq in slsdg34
Solyc01g095140.3	Late embryogenesis abundant protein (AHRD V3.3 *** B5TV69_CAMSI)	AT1G01470	Late embryogenesis abundant protein	uniq in slsdg34
Solyc12g088950.2	Leucine-rich repeat receptor-like protein kinase family (AHRD V3.3 *-* A0A0K9PTR8_ZOSMR)	AT3G19020	Leucine-rich repeat (LRR) family protein	uniq in slsdg34
Solyc02g068867.1	Non-specific serine/threonine protein kinase (AHRD V3.3 *-* M1ANR5_SOLTU)	AT3G47570	Leucine-rich repeat protein kinase family protein	uniq in slsdg34
Solyc07g018180.2	Receptor-kinase, putative (AHRD V3.3 *** B9SUC9_RICCO)	AT3G47570	Leucine-rich repeat protein kinase family protein	uniq in slsdg34
Solyc06g048530.3	Hydroxyacylglutathione hydrolase (AHRD V3.3 *** K7VP97_SOLTU)	AT3G10850	Metallo-hydrolase/oxidoreductase superfamily protein	uniq in slsdg34
Solyc11g073080.2	Methyl-CpG-binding domain-containing family protein (AHRD V3.3 *** B9HPK6_POPTR)	AT5G59800	methyl-CPG-binding domain 7	uniq in slsdg34
Solyc03g117543.1	ABC transporter family protein (AHRD V3.3 *-* A0A097P9P6_HEVBR)	AT2G07680	multidrug resistance-associated protein 11	uniq in slsdg34
Solyc01g110688.1	CTP synthase (AHRD V3.3 --* A0A068U755_COFCA)	AT4G35520	MUTL protein homolog 3	uniq in slsdg34
Solyc00g008570.2	SPA1-related 2 (AHRD V3.3 --* AT4G11110.1)	NA	NA	uniq in slsdg34
Solyc01g058500.3	LOW QUALITY:TBP-associated factor 2 (AHRD V3.3 --* AT1G73960.2)	NA	NA	uniq in slsdg34
Solyc01g060215.1	embryo defective 2410 (AHRD V3.3 --* AT2G25660.4)	NA	NA	uniq in slsdg34
Solyc01g066040.2	LOW QUALITY:WD40 domain-containing protein (AHRD V3.3 --* AT2G47410.6)	NA	NA	uniq in slsdg34
Solyc01g081170.2	Beta-glucosidase, putative (AHRD V3.3 --* B9SAQ6_RICCO)	NA	NA	uniq in slsdg34
Solyc01g087700.1	LOW QUALITY:adenosine kinase 2 (AHRD V3.3 --* AT5G03300.3)	NA	NA	uniq in slsdg34
Solyc01g097710.1	LOW QUALITY:Extensin-like protein Dif10 (AHRD V3.3 *** Q43504_SOLLC)	NA	NA	uniq in slsdg34
Solyc01g098817.1	P-loop nucleoside triphosphate hydrolases superfamily protein with CH (Calponin Homology) domain-containing protein (AHRD V3.3 --* AT1G09170.8)	NA	NA	uniq in slsdg34
Solyc01g099415.1	ATP-dependent DNA helicase Q-like SIM (AHRD V3.3 *-* A0A1D1ZDN4_9ARAE)	NA	NA	uniq in slsdg34
Solyc01g107675.1	Chloroplast envelope membrane protein (AHRD V3.3 --* CEMA_OENGL)	NA	NA	uniq in slsdg34
Solyc02g065760.2	ethylene induced calmodulin binding protein (AHRD V3.3 --* AT5G09410.4)	NA	NA	uniq in slsdg34
Solyc02g088980.2	LOW QUALITY:Protein kinase superfamily protein (AHRD V3.3 --* AT5G56890.1)	NA	NA	uniq in slsdg34
Solyc02g092523.1	DNA mismatch repair protein MLH3-like protein (AHRD V3.3 *-* A0A0X7YCF6_SOLTU)	NA	NA	uniq in slsdg34
Solyc02g092527.1	Cysteine-rich receptor-like protein kinase 38 (AHRD V3.3 --* CRK38_ARATH)	NA	NA	uniq in slsdg34
Solyc03g046275.1	DNA-directed RNA polymerase subunit (AHRD V3.3 --* A0A068TZY7_COFCA)	NA	NA	uniq in slsdg34
Solyc03g059090.1	Ribosomal protein L32e (AHRD V3.3 -** AT5G46430.2)	NA	NA	uniq in slsdg34
Solyc03g081207.1	Phototropic-responsive NPH3 family protein (AHRD V3.3 --* AT5G67385.5)	NA	NA	uniq in slsdg34
Solyc05g025580.1	LOW QUALITY:N-glycosylase/DNA lyase OGG1 (AHRD V3.3 --* OGG1_ARATH)	NA	NA	uniq in slsdg34
Solyc06g024340.2	LOW QUALITY:S-adenosylmethionine synthase (AHRD V3.3 --* METK_BRARP)	NA	NA	uniq in slsdg34
Solyc06g043000.2	Magnesium/proton exchanger 2 (AHRD V3.3 --* MHX2_ORYSJ)	NA	NA	uniq in slsdg34
Solyc08g013960.1	Disease resistance protein (AHRD V3.3 *-* W9RZV6_9ROSA)	NA	NA	uniq in slsdg34
Solyc09g008220.3	Unknown protein (AHRD V3.3 )	NA	NA	uniq in slsdg34
Solyc09g010610.2	RING/U-box superfamily protein (AHRD V3.3 --* AT5G02750.1)	NA	NA	uniq in slsdg34
Solyc09g057887.1	ABC transporter G family member 34 (AHRD V3.3 --* AB34G_ORYSJ)	NA	NA	uniq in slsdg34
Solyc09g091620.2	Protein disulfide-isomerase (AHRD V3.3 --* PDI_MAIZE)	NA	NA	uniq in slsdg34
Solyc10g079690.2	callose synthase 1 (AHRD V3.3 --* AT1G05570.4)	NA	NA	uniq in slsdg34
Solyc11g011544.1	zinc finger FYVE domain protein, putative (DUF1666) (AHRD V3.3 --* AT1G69610.3)	NA	NA	uniq in slsdg34
Solyc11g027640.1	LOW QUALITY:phosphatidylinositol 4-OH kinase beta1 (AHRD V3.3 --* AT5G64070.2)	NA	NA	uniq in slsdg34
Solyc11g066810.2	Plasma-membrane choline transporter family protein (AHRD V3.3 --* AT3G04440.1)	NA	NA	uniq in slsdg34
Solyc12g021320.1	LOW QUALITY:FAR1-related sequence 3 (AHRD V3.3 --* AT2G27110.3)	NA	NA	uniq in slsdg34
Solyc12g042715.1	actin filament bundling protein P-115-ABP protein (AHRD V3.3 --* AT5G57320.2)	NA	NA	uniq in slsdg34
Solyc12g062200.1	LOW QUALITY:Ferredoxin--NADP reductase, chloroplastic (AHRD V3.3 --* FENR_CHLRE)	NA	NA	uniq in slsdg34
Solyc12g062800.1	SCAR family protein (AHRD V3.3 --* AT2G34150.5)	NA	NA	uniq in slsdg34
Solyc12g077660.2	Protein SET (AHRD V3.3 *-* A0A0B0PFE9_GOSAR)	AT1G18800	NAP1-related protein 2	uniq in slsdg34
Solyc04g009290.1	Nbs-lrr resistance protein (AHRD V3.3 *** A0A061FZT5_THECC)	AT3G46530	NB-ARC domain-containing disease resistance protein	uniq in slsdg34
Solyc06g008400.2	Mi1.5	AT3G46710	NB-ARC domain-containing disease resistance protein	uniq in slsdg34
Solyc11g013810.2	Nitrate reductase (AHRD V3.3 *** K4D6I5_SOLLC)	AT1G37130	nitrate reductase 2	uniq in slsdg34
Solyc12g006120.2	Nuclear transcription factor Y protein (AHRD V3.3 *** G7K4Q5_MEDTR)	AT4G14540	nuclear factor Y, subunit B3	uniq in slsdg34
Solyc09g055420.1	Nucleoside diphosphate kinase (AHRD V3.3 *** NDK_CAPAN)	AT4G09320	Nucleoside diphosphate kinase family protein	uniq in slsdg34
Solyc00g277510.2	Photosystem II protein D1 (AHRD V3.3 *-* PSBA_SOLNI)	ATCG00020	photosystem II reaction center protein A	uniq in slsdg34
Solyc07g018387.1	Photosystem II reaction center protein I (AHRD V3.3 *** M9TLF1_SOLCA)	ATCG00080	photosystem II reaction center protein I	uniq in slsdg34
Solyc03g083770.1	Plant invertase/pectin methylesterase inhibitor superfamily protein (AHRD V3.3 *** AT5G62360.1)	AT5G62360	Plant invertase/pectin methylesterase inhibitor superfamily protein	uniq in slsdg34
Solyc00g217560.1	Transcription factor, TCP (AHRD V3.3 *-* A0A103Y4W6_CYNCS)	AT3G02150	plastid transcription factor 1	uniq in slsdg34
Solyc01g005180.1	Homeobox-leucine zipper protein HOX9, putative (AHRD V3.3 --* A0A061DUZ5_THECC)	AT3G52770	protein binding	uniq in slsdg34
Solyc08g007480.2	DUF1442 family protein (AHRD V3.3 *** G7KG69_MEDTR)	AT2G45360	Protein of unknown function (DUF1442)	uniq in slsdg34
Solyc03g006410.3	DUF506 family protein (AHRD V3.3 *** G7IPT8_MEDTR)	AT4G32480	Protein of unknown function (DUF506)	uniq in slsdg34
Solyc06g072410.2	DUF674 family protein (AHRD V3.3 *-* A0A072TP22_MEDTR)	AT5G01130	Protein of unknown function (DUF674)	uniq in slsdg34
Solyc10g050200.1	LOW QUALITY:transmembrane protein, putative (DUF679 domain membrane protein 2) (AHRD V3.3 *** AT3G21550.1)	AT5G46090	Protein of unknown function (DUF679)	uniq in slsdg34
Solyc12g013730.2	Leucine-rich repeat receptor-like protein kinase family protein (AHRD V3.3 *-* AT3G24240.1)	AT1G71400	receptor like protein 12	uniq in slsdg34
Solyc12g010700.2	Regulator of Vps4 activity in the MVB pathway protein, putative (AHRD V3.3 *** A0A061E4V2_THECC)	AT2G14830	Regulator of Vps4 activity in the MVB pathway protein	uniq in slsdg34
Solyc03g096770.1	Response to low sulfur protein, putative (AHRD V3.3 *** G7J9Q1_MEDTR)	AT5G24660	response to low sulfur 2	uniq in slsdg34
Solyc06g072990.1	LOW QUALITY:Response to low sulfur protein, putative (AHRD V3.3 *** G7J9Q1_MEDTR)	AT5G24660	response to low sulfur 2	uniq in slsdg34
Solyc06g066650.3	rop guanine nucleotide exchange factor-like protein (AHRD V3.3 *** AT1G52240.1)	AT1G79860	RHO guanyl-nucleotide exchange factor 12	uniq in slsdg34
Solyc12g035860.1	30S ribosomal protein S11, chloroplastic (AHRD V3.3 *-* RR11_PLAOC)	ATCG00750	ribosomal protein S11	uniq in slsdg34
Solyc04g039840.1	Ribulose bisphosphate carboxylase large chain (AHRD V3.3 *-* RBL_VIGUN)	ATCG00490	ribulose-bisphosphate carboxylases	uniq in slsdg34
Solyc12g062540.2	Ribulose bisphosphate carboxylase large chain (AHRD V3.3 *** RBL_HYDFO)	ATCG00490	ribulose-bisphosphate carboxylases	uniq in slsdg34
Solyc03g116440.2	PHD finger protein family (AHRD V3.3 *-* A0A151RBP6_CAJCA)	AT2G01810	RING/FYVE/PHD zinc finger superfamily protein	uniq in slsdg34
Solyc04g081890.1	RING/U-box superfamily protein (AHRD V3.3 *** A0A061FKT7_THECC)	AT5G42200	RING/U-box superfamily protein	uniq in slsdg34
Solyc02g085590.3	BAC19.13 (AHRD V3.3 *** Q9FYW3_SOLLC)	AT2G18540	RmlC-like cupins superfamily protein	uniq in slsdg34
Solyc06g075280.3	Vicilin-like antimicrobial peptides 2-2 (AHRD V3.3 *** W9SCA8_9ROSA)	AT2G28490	RmlC-like cupins superfamily protein	uniq in slsdg34
Solyc03g065320.1	LOW QUALITY:DNA-directed RNA polymerase subunit beta (AHRD V3.3 *-* RPOB_TOBAC)	ATCG00190	RNA polymerase subunit beta	uniq in slsdg34
Solyc02g091440.2	basic helix-loop-helix (bHLH) DNA-binding superfamily protein (AHRD V3.3 *-* AT2G14760.1)	AT1G66470	ROOT HAIR DEFECTIVE6	uniq in slsdg34
Solyc11g005240.1	LOW QUALITY:Sensitivity to red light reduced 1 (AHRD V3.3 *-* A0A061F8P0_THECC)	AT5G59560	sensitivity to red light reduced protein (SRR1)	uniq in slsdg34
Solyc05g010240.3	Chaperonin-60 beta subunit (AHRD V3.3 *** P93570_SOLTU)	AT1G26230	TCP-1/cpn60 chaperonin family protein	uniq in slsdg34
Solyc01g088670.2	Pentatricopeptide repeat-containing protein (AHRD V3.3 *** A0A103XUK0_CYNCS)	AT5G01110	Tetratricopeptide repeat (TPR)-like superfamily protein	uniq in slsdg34
Solyc03g081210.1	WD40 repeat protein (AHRD V3.3 *** L7T9S0_SOLTU)	AT5G24520	Transducin/WD40 repeat-like superfamily protein	uniq in slsdg34
Solyc02g071595.1	Trehalose-6-phosphate synthase 1 (AHRD V3.3 *-* B3VL84_9POAL)	AT1G78580	trehalose-6-phosphate synthase	uniq in slsdg34
Solyc07g007000.1	Protein trichome birefringence (AHRD V3.3 *-* TBR_ARATH)	AT5G20590	TRICHOME BIREFRINGENCE-LIKE 5	uniq in slsdg34
Solyc05g012670.1	Glycosyltransferase (AHRD V3.3 *** K4DC82_SOLLC)	AT2G36770	UDP-Glycosyltransferase superfamily protein	uniq in slsdg34
Solyc10g085280.1	Glycosyltransferase (AHRD V3.3 *** K4D3W2_SOLLC)	AT3G11340	UDP-Glycosyltransferase superfamily protein	uniq in slsdg34
Solyc07g062910.3	Protein yippee-like (AHRD V3.3 *** A0A0V0H2B2_SOLCH)	AT5G53940	Yippee family putative zinc-binding protein	uniq in slsdg34

## Sheet: TableS3
Supplemental table 3. Genes differentially expressed in slsdg33 vs WT in roots.
A. Up-regulated genes in slsdg33 vs WT
Gene ID	ITAG3.2 annotation	Arabidopsis homolog	TAIR10 annotation	shared with slsdg34
Solyc01g107090.2	LOW QUALITY:beta-1,4-xylosidase (AHRD V3.3 *** AT3G19615.1)	AT3G19615	N/A	shared
Solyc01g107100.3	LOW QUALITY:beta-1,4-xylosidase (AHRD V3.3 *** AT3G19615.1)	AT3G19615	N/A	shared
Solyc01g109800.2	LOW QUALITY:Transmembrane protein, putative (AHRD V3.3 *-* G7J762_MEDTR)	AT2G21560	N/A	shared
Solyc02g090120.1	LOW QUALITY:Inositol 1,4,5-trisphosphate receptor-interacting protein-like 2 (AHRD V3.3 -** A0A1D1XL30_9ARAE)	AT5G66985	N/A	shared
Solyc03g064030.3	alpha/beta hydrolase family protein (AHRD V3.3 *** AT3G12150.1)	AT3G12150	N/A	shared
Solyc03g113660.3	Nuclear mitotic apparatus 1 (AHRD V3.3 *-* A0A0B0NXR3_GOSAR)	AT1G74860	N/A	shared
Solyc04g054340.1	LOW QUALITY:transmembrane protein (AHRD V3.3 --* AT5G65440.9)	AT5G65207	N/A	shared
Solyc04g055130.1	LOW QUALITY:C2 domain protein (AHRD V3.3 *** A0A072UZT9_MEDTR)	AT5G65030	N/A	shared
Solyc04g080540.2	DNA polymerase epsilon catalytic subunit A, putative (AHRD V3.3 *** A0A061FCM9_THECC)	AT1G19530	N/A	shared
Solyc04g081960.1	LOW QUALITY:Syringolide-induced protein 14-1-1 (AHRD V3.3 *** G7I8D2_MEDTR)	AT1G76070	N/A	shared
Solyc05g012850.2	transmembrane protein (AHRD V3.3 *** AT3G11810.1)	AT3G11810	N/A	shared
Solyc05g052890.3	Cytochrome f (AHRD V3.3 --* CYF_PINTH)	AT5G02020	N/A	shared
Solyc05g053050.1	LOW QUALITY:cyclin-dependent kinase inhibitor (AHRD V3.3 *** AT5G02220.1)	AT5G02220	N/A	shared
Solyc06g066510.1	LOW QUALITY:Avr9/Cf-9 rapidly elicited protein (AHRD V3.3 *-* G7II06_MEDTR)	AT3G16330	N/A	shared
Solyc07g041830.3	Damaged dna-binding 2, putative isoform 1 (AHRD V3.3 *** A0A061GM96_THECC)	AT5G21940	N/A	shared
Solyc07g042100.3	Early auxin response protein (AHRD V3.3 *** Q69P88_ORYSJ)	AT1G72490	N/A	shared
Solyc07g045260.2	Cytoplasmic dynein 2 light intermediate chain 1 (AHRD V3.3 *-* A0A0B0PF95_GOSAR)	AT2G04340	N/A	shared
Solyc09g075600.2	GATA transcription factor-like protein (AHRD V3.3 *** AT1G02700.1)	AT1G02700	N/A	shared
Solyc10g086570.3	Chaperone DnaJ (AHRD V3.3 *** A0A0B0NPS3_GOSAR)	AT5G02160	N/A	shared
Solyc12g010420.1	LOW QUALITY:NHL domain protein (AHRD V3.3 --* AT5G14895.1)	AT5G11070	N/A	shared
Solyc12g010430.1	LOW QUALITY:NHL domain protein (AHRD V3.3 --* AT3G01430.1)	AT5G35090	N/A	shared
Solyc12g017820.2	Golgi to ER traffic 4 (AHRD V3.3 *** A0A0B0NU26_GOSAR)	AT5G63220	N/A	shared
Solyc12g019550.2	Lipase maturation factor 2 (AHRD V3.3 *** A0A1D1ZBR5_9ARAE)	AT1G21500	N/A	shared
Solyc01g090140.2	2-oxoglutarate (2OG) and Fe(II)-dependent oxygenase superfamily protein (AHRD V3.3 *** AT2G44800.1)	AT2G44800	2-oxoglutarate (2OG) and Fe(II)-dependent oxygenase superfamily protein	shared
Solyc06g068270.3	2-oxoglutarate (2OG) and Fe(II)-dependent oxygenase superfamily protein (AHRD V3.3 *** AT1G49390.1)	AT1G49390	2-oxoglutarate (2OG) and Fe(II)-dependent oxygenase superfamily protein	shared
Solyc06g073080.3	2-oxoglutarate (2OG) and Fe(II)-dependent oxygenase superfamily protein (AHRD V3.3 *** AT5G24530.1)	AT5G24530	2-oxoglutarate (2OG) and Fe(II)-dependent oxygenase superfamily protein	shared
Solyc09g008560.3	2-oxoglutarate (2OG) and Fe(II)-dependent oxygenase superfamily protein (AHRD V3.3 *** AT2G36690.2)	AT2G36690	2-oxoglutarate (2OG) and Fe(II)-dependent oxygenase superfamily protein	shared
Solyc01g010470.2	5'-AMP-activated protein kinase subunit beta-1 (AHRD V3.3 *-* A0A1D1Y9A4_9ARAE)	AT1G27070	5'-AMP-activated protein kinase-related	shared
Solyc06g072000.2	P-loop containing nucleoside triphosphate hydrolases superfamily protein (AHRD V3.3 *** AT4G24860.4)	AT4G02480	AAA-type ATPase family protein	shared
Solyc07g026650.3	1-aminocyclopropane-1-carboxylate oxidase 5	AT2G19590	ACC oxidase 1	shared
Solyc05g025890.2	Acyl-CoA N-acyltransferases (NAT) superfamily protein (AHRD V3.3 *** AT2G06025.6)	AT2G06025	Acyl-CoA N-acyltransferases (NAT) superfamily protein	shared
Solyc01g106170.3	AGAMOUS-like MADS-box transcription factor (AHRD V3.3 *-* Q84LE8_GINBI)	AT4G37940	AGAMOUS-like 21	shared
Solyc06g054290.2	Alpha/beta-Hydrolases superfamily protein (AHRD V3.3 *** A0A061EKQ6_THECC)	AT1G19190	alpha/beta-Hydrolases superfamily protein	shared
Solyc11g027840.2	1,4-beta-D-glucanase (AHRD V3.3 *** B4FHX7_MAIZE)	AT1G35420	alpha/beta-Hydrolases superfamily protein	shared
Solyc03g006490.3	glutaminase domain-containing protein	AT4G27450	Aluminium induced protein with YGL and LRDR motifs	shared
Solyc03g078320.1	Long-Chain Acyl-CoA Synthetase (AHRD V3.3 *-* A0A0G2SJB5_SALMI)	AT4G11030	AMP-dependent synthetase and ligase family protein	shared
Solyc06g083590.3	ABI3	AT3G24650	AP2/B3-like transcriptional factor family protein	shared
Solyc10g011730.3	Arabinogalactan peptide 20 (AHRD V3.3 *** AGP20_ARATH)	AT3G61640	arabinogalactan protein 20	shared
Solyc10g075170.2	Aspartate aminotransferase (AHRD V3.3 *-* A0A067JJ16_JATCU)	AT2G30970	aspartate aminotransferase 1	shared
Solyc10g075175.1	Aspartate aminotransferase (AHRD V3.3 *** B9HDA1_POPTR)	AT2G30970	aspartate aminotransferase 1	shared
Solyc03g115870.3	Thioredoxin (AHRD V3.3 *** A0A072UTZ5_MEDTR)	AT5G61440	atypical CYS HIS rich thioredoxin 5	shared
Solyc01g068410.3	SlPIN5	AT5G16530	Auxin efflux carrier family protein	shared
Solyc03g119540.3	CONSTANS-like zinc finger protein (AHRD V3.3 *** I1LEW9_SOYBN)	AT1G68520	B-box type zinc finger protein with CCT domain	shared
Solyc03g095980.3	bHLH transcription factor 021	AT2G40200	basic helix-loop-helix (bHLH) DNA-binding superfamily protein	shared
Solyc01g100460.3	BZIP transcription factor family protein (AHRD V3.3 *** B9GSS6_POPTR)	AT3G62420	basic region/leucine zipper motif 53	shared
Solyc00g050430.3	bHLH transcription factor 073	AT5G65640	beta HLH protein 93	shared
Solyc02g063430.3	bHLH transcription factor 078	AT5G65640	beta HLH protein 93	shared
Solyc12g088130.2	basic helix-loop-helix (bHLH) DNA-binding superfamily protein (AHRD V3.3 *** AT5G10570.1)	AT5G65640	beta HLH protein 93	shared
Solyc03g034000.3	bHLH transcription factor 020	AT4G36540	BR enhanced expression 2	shared
Solyc03g031630.3	Calcium-binding EF-hand family protein (AHRD V3.3 *** A0A061DTS7_THECC)	AT2G44310	Calcium-binding EF-hand family protein	shared
Solyc08g062930.2	Calmodulin binding protein, putative (AHRD V3.3 *** B9RQR7_RICCO)	AT5G57010	calmodulin-binding family protein	shared
Solyc12g005030.2	Protein kinase (AHRD V3.3 *** Q9AR92_MEDSA)	AT3G20410	calmodulin-domain protein kinase 9	shared
Solyc11g071740.2	Calmodulin-like protein (AHRD V1 ***- Q0VJ70_DATME)	AT1G76650	calmodulin-like 38	shared
Solyc02g085800.1	Alpha/beta-Hydrolases superfamily protein (AHRD V3.3 *** A0A061EB00_THECC)	AT5G16080	carboxyesterase 17	shared
Solyc06g068450.2	Non-specific serine/threonine protein kinase (AHRD V3.3 *** K4C820_SOLLC)	AT5G25110	CBL-interacting protein kinase 25	shared
Solyc02g092030.2	DUF21 domain-containing-like protein (AHRD V3.3 *** A0A0B0NQ32_GOSAR)	AT2G14520	CBS domain-containing protein with a domain of unknown function (DUF21)	shared
Solyc05g052240.3	Chalcone-flavonone isomerase family protein (AHRD V3.3 *** A0A0V0H4Z0_SOLCH)	AT5G05270	Chalcone-flavanone isomerase family protein	shared
Solyc04g081530.1	DNAJ-like protein (AHRD V3.3 *** A2TJX6_SOLLC)	AT4G36040	Chaperone DnaJ-domain superfamily protein	shared
Solyc07g065970.1	Chaperone protein DNAj, putative (AHRD V3.3 *** B9SXA3_RICCO)	AT3G13310	Chaperone DnaJ-domain superfamily protein	shared
Solyc02g094060.3	Chloride channel protein (AHRD V3.3 *** Q9XF71_TOBAC)	AT5G40890	chloride channel A	shared
Solyc09g082600.2	Chlorophyllase (AHRD V3.3 *** F1BPW6_SOLPN)	AT5G43860	chlorophyllase 2	shared
Solyc05g047530.3	trans-cinnamate 4-monooxygenase	AT2G30490	cinnamate-4-hydroxylase	shared
Solyc00g071180.3	multicystatin	AT3G12490	cystatin B	shared
Solyc12g027540.2	Retrovirus-related Pol polyprotein from transposon TNT 1-94 (AHRD V3.3 *-* A0A151RVI7_CAJCA)	AT4G23160	cysteine-rich RLK (RECEPTOR-like protein kinase) 8	shared
Solyc08g083520.2	Cytochrome P450 family protein (AHRD V3.3 *** U5GNW2_POPTR)	AT4G12320	cytochrome P450, family 706, subfamily A, polypeptide 6	shared
Solyc07g055440.2	Cytochrome P450 (AHRD V3.3 *** A0A124SAX2_CYNCS)	AT3G14690	cytochrome P450, family 72, subfamily A, polypeptide 15	shared
Solyc07g055460.3	Cytochrome P450 (AHRD V3.3 *** A0A124SAX2_CYNCS)	AT3G14690	cytochrome P450, family 72, subfamily A, polypeptide 15	shared
Solyc04g078370.3	Cytochrome P450 (AHRD V3.3 *** C5NM78_TOBAC)	AT5G10600	cytochrome P450, family 81, subfamily K, polypeptide 2	shared
Solyc03g111300.1	Cytochrome P450, putative (AHRD V3.3 *** B9RAH1_RICCO)	AT3G48520	cytochrome P450, family 94, subfamily B, polypeptide 3	shared
Solyc10g083400.1	Cytochrome P450, putative (AHRD V3.3 *** B9T5M5_RICCO)	AT2G27690	cytochrome P450, family 94, subfamily C, polypeptide 1	shared
Solyc01g088160.3	cytokinin oxidase2	AT3G63440	cytokinin oxidase/dehydrogenase 6	shared
Solyc06g075520.3	Dehydroascorbate reductase (AHRD V3.3 *-* Q1G0W3_SOLLC),Pfam:PF13410	AT1G75270	dehydroascorbate reductase 2	shared
Solyc01g094170.3	Digalactosyldiacylglycerol synthase (AHRD V3.3 *** A2Q3N6_MEDTR)	AT4G00550	digalactosyl diacylglycerol deficient 2	shared
Solyc12g006560.2	Early nodulin-93 (AHRD V3.3 *** A0A061GV12_THECC)	AT5G25940	early nodulin-related	shared
Solyc12g006680.2	Early nodulin 93 protein (AHRD V3.3 *** A3FGC9_9ROSI)	AT5G25940	early nodulin-related	shared
Solyc01g080020.2	Eukaryotic aspartyl protease family protein, putative (AHRD V3.3 *** A0A061ELJ0_THECC)	AT1G03230	Eukaryotic aspartyl protease family protein	shared
Solyc01g098770.1	Eukaryotic aspartyl protease family protein, putative (AHRD V3.3 *** A0A061F3Y1_THECC)	AT1G03220	Eukaryotic aspartyl protease family protein	shared
Solyc09g072930.1	LOW QUALITY:F-box associated interaction domain-containing protein (AHRD V3.3 *** A0A103XHT5_CYNCS)	AT3G23880	F-box and associated interaction domains-containing protein	shared
Solyc02g079150.2	F-box family protein (AHRD V3.3 *** B9H220_POPTR)	AT4G21510	F-box family protein	shared
Solyc02g092290.3	F-box family protein (AHRD V3.3 *** B9GFH4_POPTR)	AT3G03360	F-box/RNI-like superfamily protein	shared
Solyc01g006050.2	LOW QUALITY:Transmembrane protein 45B (AHRD V3.3 *** A0A151U0K4_CAJCA)	AT1G55230	Family of unknown function (DUF716)	shared
Solyc01g094910.3	ferric-chelate reductase	AT1G01580	ferric reduction oxidase 2	shared
Solyc02g093910.3	Kelch repeat-containing protein family (AHRD V3.3 *** A0A151RD96_CAJCA)	AT1G51540	Galactose oxidase/kelch repeat superfamily protein	shared
Solyc10g080610.1	F-box/kelch-repeat protein (AHRD V3.3 *** A0A172MAC1_VITPS)	AT1G15670	Galactose oxidase/kelch repeat superfamily protein	shared
Solyc07g061720.3	gibberellin 2-oxidase 4	AT1G30040	gibberellin 2-oxidase	shared
Solyc07g061730.3	gibberellin 2-oxidase 5	AT1G30040	gibberellin 2-oxidase	shared
Solyc01g067440.3	Glutaredoxin family protein (AHRD V3.3 *** AT3G21460.1)	AT3G21460	Glutaredoxin family protein	shared
Solyc11g005270.1	LOW QUALITY:Glutaredoxin family protein (AHRD V3.3 *** AT5G13810.1)	AT5G13810	Glutaredoxin family protein	shared
Solyc07g056510.3	Glutathione S-transferase (AHRD V1 **** D3Y4H6_9ROSI)	AT1G17180	glutathione S-transferase TAU 25	shared
Solyc01g081250.3	Glutathione s-transferase, putative (AHRD V3.3 *** B9SPC9_RICCO)	AT3G09270	glutathione S-transferase TAU 8	shared
Solyc02g087500.2	Glycerol-3-phosphate acyltransferase (AHRD V3.3 *** A0A0M4FCN7_9SOLA)	AT2G38110	glycerol-3-phosphate acyltransferase 6	shared
Solyc02g081830.3	Haloacid dehalogenase-like hydrolase domain-containing protein 3 (AHRD V3.3 *** W9RRW5_9ROSA),Pfam:PF00702	AT5G44730	Haloacid dehalogenase-like hydrolase (HAD) superfamily protein	shared
Solyc03g082420.3	Heat shock protein (AHRD V3.3 *** A9QVH3_9FABA)	AT4G27670	heat shock protein 21	shared
Solyc07g040680.3	SolycHsfA9	AT2G26150	heat shock transcription factor A2	shared
Solyc07g008240.3	Non-symbiotic hemoglobin 1 (AHRD V3.3 *** HBL1_GOSHI)	AT2G16060	hemoglobin 1	shared
Solyc09g074820.3	Potassium transporter (AHRD V3.3 *** M1AT44_SOLTU)	AT4G13420	high affinity K+ transporter 5	shared
Solyc04g009020.3	PsbB mRNA maturation factor Mbb1 (AHRD V3.3 *** W9RTZ1_9ROSA)	AT3G17040	high chlorophyll fluorescent 107	shared
Solyc06g076400.3	Protein phosphatase 2C (AHRD V3.3 *** A0A103XPQ7_CYNCS)	AT2G29380	highly ABA-induced PP2C gene 3	shared
Solyc05g006980.3	Homeobox leucine zipper family protein (AHRD V3.3 *** G7K9R5_MEDTR)	AT3G01470	homeobox 1	shared
Solyc03g098320.3	Myb transcription factor (AHRD V3.3 *** A0A072UBN0_MEDTR)	AT1G18330	Homeodomain-like superfamily protein	shared
Solyc09g074690.3	Homeobox LUMINIDEPENDENS-like protein (AHRD V3.3 *-* A0A0B0NNT5_GOSAR)	AT4G02560	Homeodomain-like superfamily protein	shared
Solyc09g074700.2	Homeobox protein LUMINIDEPENDENS (AHRD V3.3 *-* A0A0B2R2D8_GLYSO)	AT4G02560	Homeodomain-like superfamily protein	shared
Solyc04g078350.1	LOW QUALITY:HXXXD-type acyl-transferase family protein (AHRD V3.3 *-* AT5G42830.1)	AT5G42830	HXXXD-type acyl-transferase family protein	shared
Solyc02g091700.3	hydroxyproline-rich glycoprotein family protein (AHRD V3.3 *** AT5G65660.1)	AT5G65660	hydroxyproline-rich glycoprotein family protein	shared
Solyc08g063040.3	Zinc-finger protein	AT3G50700	indeterminate(ID)-domain 2	shared
Solyc06g033850.3	Dehydration responsive element-binding factor protein (AHRD V3.3 --* A0A0K0K9Y3_ELECO)	AT1G75490	Integrase-type DNA-binding superfamily protein	shared
Solyc06g050520.2	dehydration responsive element binding protein 1	AT2G40340	Integrase-type DNA-binding superfamily protein	shared
Solyc09g075420.3	ethylene response factor E.1	AT2G47520	Integrase-type DNA-binding superfamily protein	shared
Solyc10g017490.2	MAP kinase kinase kinase 74	AT4G18950	Integrin-linked protein kinase family	shared
Solyc03g098720.3	Kunitz trypsin inhibitor (AHRD V3.3 *** Q4W188_POPTN)	AT1G73325	Kunitz family trypsin and protease inhibitor protein	shared
Solyc08g078850.3	lactate dehydrogenase	AT4G17260	Lactate/malate dehydrogenase family protein	shared
Solyc07g007410.3	Leucine-rich repeat family protein (AHRD V3.3 *** AT1G15740.1)	AT1G15740	Leucine-rich repeat family protein	shared
Solyc07g007420.3	F-box/LRR-repeat protein, putative (AHRD V3.3 *-* B9RVD1_RICCO)	AT1G15740	Leucine-rich repeat family protein	shared
Solyc02g024060.2	Leucine-rich repeat receptor-like protein kinase (AHRD V3.3 *-* Q8GY50_ARATH)	AT1G79620	Leucine-rich repeat protein kinase family protein	shared
Solyc06g007390.3	LOB domain-containing protein, putative (AHRD V3.3 *** B9S4B8_RICCO)	AT2G30340	LOB domain-containing protein 13	shared
Solyc12g100150.2	LOB domain-containing protein, putative (AHRD V3.3 *** B9RI26_RICCO)	AT1G31320	LOB domain-containing protein 4	shared
Solyc02g085910.3	LOB domain-containing protein (AHRD V3.3 *** A0A0K9PUI8_ZOSMR)	AT3G02550	LOB domain-containing protein 41	shared
Solyc03g119530.3	LOB domain protein 40 (AHRD V3.3 *** K7VSW9_SOLTU)	AT3G02550	LOB domain-containing protein 41	shared
Solyc03g117700.2	Major facilitator superfamily protein (AHRD V3.3 *-* A0A061G9T3_THECC)	AT1G79710	Major facilitator superfamily protein	shared
Solyc06g005070.2	Major facilitator superfamily protein (AHRD V3.3 *** AT1G68570.1)	AT1G68570	Major facilitator superfamily protein	shared
Solyc01g108910.3	Maternal effect embryo arrest protein, putative (AHRD V3.3 *** G7JNK2_MEDTR)	AT2G15890	maternal effect embryo arrest 14	shared
Solyc02g089630.3	Proline dehydrogenase (AHRD V3.3 *** A0A0H4CNX3_BETPL)	AT5G38710	Methylenetetrahydrofolate reductase family protein	shared
Solyc12g096030.1	LOW QUALITY:Mitochondrial carrier protein (AHRD V3.3 *** F8WLA3_CITUN)	AT1G72820	Mitochondrial substrate carrier family protein	shared
Solyc10g083900.2	R2R3MYB transcription factor 27	AT3G53200	myb domain protein 27	shared
Solyc10g005460.3	MYB transcription factor (AHRD V3.3 *** A0A0U3IU11_MESCR)	AT4G21440	MYB-like 102	shared
Solyc07g026675.1	myb-like transcription factor family protein (AHRD V3.3 *-* AT5G56840.1)	AT5G56840	myb-like transcription factor family protein	shared
Solyc10g005400.3	Myo-inositol oxygenase (AHRD V3.3 *** C6K2L2_SOLLC)	AT1G14520	myo-inositol oxygenase 1	shared
Solyc04g005610.3	NAC domain protein NAC2	AT1G69490	NAC-like, activated by AP3/PI	shared
Solyc05g007770.3	NAC domain TF	AT1G69490	NAC-like, activated by AP3/PI	shared
Solyc04g077745.1	NADH-ubiquinone oxidoreductase-like protein (AHRD V3.3 *-* AT5G67590.1)	AT5G67590	NADH-ubiquinone oxidoreductase-related	shared
Solyc06g064750.1	NBS-LRR resistance protein-like protein (AHRD V3.3 *** A1Y9Q8_SOLLC)	AT3G46530	NB-ARC domain-containing disease resistance protein	shared
Solyc04g011340.3	WAT1-related protein (AHRD V3.3 *** K4BPI9_SOLLC)	AT2G39510	nodulin MtN21 /EamA-like transporter family protein	shared
Solyc08g078580.2	WAT1-related protein (AHRD V3.3 *** A0A0V0IGS4_SOLCH)	AT5G47470	Nodulin MtN21 /EamA-like transporter family protein	shared
Solyc06g069140.2	Ribosomal RNA small subunit methyltransferase NEP1 (AHRD V3.3 *** A0A0B0N413_GOSAR)	AT3G57000	nucleolar essential protein-related	shared
Solyc01g005390.3	Nudix hydrolase (AHRD V3.3 *** A0A061E9N4_THECC)	AT1G14860	nudix hydrolase homolog 18	shared
Solyc05g053860.3	Organic cation/carnitine transporter (AHRD V3.3 *** A0A072TPM4_MEDTR)	AT1G16390	organic cation/carnitine transporter 3	shared
Solyc03g031890.3	Oxidative stress 3, putative isoform 2 (AHRD V3.3 *** A0A061GIQ6_THECC)	AT5G56550	oxidative stress 3	shared
Solyc06g071990.3	ATPase family AAA domain-containing protein 1 (AHRD V3.3 *-* A0A0B0PMY4_GOSAR)	AT4G24860	P-loop containing nucleoside triphosphate hydrolases superfamily protein	shared
Solyc10g080690.2	Patatin (AHRD V3.3 *** K4D2V9_SOLLC)	AT3G54950	patatin-like protein 6	shared
Solyc12g096750.2	Dbxref=InterPro:IPR000408	AT2G43870	Pectin lyase-like superfamily protein	shared
Solyc01g095690.2	Pentatricopeptide repeat-containing protein, putative (AHRD V3.3 *** A0A061DSI9_THECC)	AT4G01030	pentatricopeptide (PPR) repeat-containing protein	shared
Solyc12g008550.2	Peptidase M28 family protein (AHRD V3.3 *-* AT5G19740.1)	AT5G19740	Peptidase M28 family protein	shared
Solyc06g082040.2	PHD finger transcription factor (AHRD V3.3 *-* AT5G58610.3)	AT5G58610	PHD finger transcription factor, putative	shared
Solyc08g066100.3	ATP-dependent 6-phosphofructokinase (AHRD V3.3 *** A0A0V0IM90_SOLCH)	AT4G26270	phosphofructokinase 3	shared
Solyc04g079260.3	Patatin (AHRD V3.3 *** K4BV10_SOLLC)	AT2G26560	phospholipase A 2A	shared
Solyc07g043580.3	bHLH transcription factor 052	AT2G43010	phytochrome interacting factor 4	shared
Solyc08g061060.2	Barwin-like endoglucanase (AHRD V3.3 *** A0A103XZL4_CYNCS)	AT2G18660	plant natriuretic peptide A	shared
Solyc10g084600.2	Plant protein 1589 of unknown function (AHRD V3.3 *** AT3G55240.1)	AT3G55240	Plant protein 1589 of unknown function	shared
Solyc06g072940.2	auxin canalization protein (DUF828) (AHRD V3.3 *-* AT5G57770.1)	AT5G57770	Plant protein of unknown function (DUF828) with plant pleckstrin homology-like region	shared
Solyc11g008680.2	Acyl-[acyl-carrier-protein] desaturase (AHRD V3.3 *** A0A060IKL1_NICBE)	AT3G02630	Plant stearoyl-acyl-carrier-protein desaturase family protein	shared
Solyc10g054840.2	X-intrinsic protein 1.1	AT4G23400	plasma membrane intrinsic protein 1;5	shared
Solyc02g067440.3	meloidogyne-induced giant cell protein DB114	AT5G39890	Protein of unknown function (DUF1637)	shared
Solyc02g087740.3	2-aminoethanethiol dioxygenase (AHRD V3.3 *** A0A0B0PVN9_GOSAR)	AT5G39890	Protein of unknown function (DUF1637)	shared
Solyc03g113130.3	2-aminoethanethiol dioxygenase (AHRD V3.3 *** A0A0B0PVN9_GOSAR)	AT5G39890	Protein of unknown function (DUF1637)	shared
Solyc06g007580.1	LOW QUALITY:DUF506 family protein (AHRD V3.3 *** G7LF52_MEDTR)	AT3G07350	Protein of unknown function (DUF506)	shared
Solyc06g054640.2	DUF506 family protein (AHRD V3.3 *** G7LD84_MEDTR)	AT2G38820	Protein of unknown function (DUF506)	shared
Solyc07g053900.2	DUF506 family protein (AHRD V3.3 *** G7JTT3_MEDTR)	AT4G32480	Protein of unknown function (DUF506)	shared
Solyc09g005210.3	Protein LURP-one-related 12 (AHRD V3.3 *** A0A199W2R9_ANACO)	AT1G80120	Protein of unknown function (DUF567)	shared
Solyc03g123460.3	DUF581 family protein (AHRD V3.3 *-* G7L953_MEDTR)	AT1G53903	Protein of unknown function (DUF581)	shared
Solyc08g077480.3	senescence-associated family protein (DUF581) (AHRD V3.3 *** AT4G17670.1)	AT4G17670	Protein of unknown function (DUF581)	shared
Solyc09g065390.1	LOW QUALITY:Pre-mRNA cleavage complex 2 protein Pcf11, putative isoform 2 (AHRD V3.3 *-* A0A061GBF7_THECC)	AT3G22550	Protein of unknown function (DUF581)	shared
Solyc04g071523.1	UPF0496 protein (AHRD V3.3 *** A0A0B2QAE4_GLYSO)	AT3G49070	Protein of unknown function (DUF677)	shared
Solyc07g054270.3	Plant/F9H3-4 protein (AHRD V3.3 *** A0A072VLR0_MEDTR)	AT4G03420	Protein of unknown function (DUF789)	shared
Solyc09g007790.1	LOW QUALITY:Senescence regulator (AHRD V3.3 *** G7IRS7_MEDTR)	AT3G45210	Protein of unknown function, DUF584	shared
Solyc10g007800.3	protodermal factor 1 (AHRD V3.3 *-* AT2G42840.1)	AT2G42840	protodermal factor 1	shared
Solyc06g051560.3	Flavoprotein wrbA (AHRD V3.3 *-* A0A1D1ZBK1_9ARAE)	AT4G27270	Quinone reductase family protein	shared
Solyc12g100010.1	Leucine-rich-repeat receptor-like protein (AHRD V3.3 *** A0A0D4WVW2_GOSBA)	AT1G45616	receptor like protein 6	shared
Solyc02g088430.1	RecQ family ATP-dependent DNA helicase (AHRD V3.3 *-* A0A072VML8_MEDTR)	AT5G27680	RECQ helicase SIM	shared
Solyc10g050970.1	Ethylene Response Factor D.4	AT4G34410	redox responsive transcription factor 1	shared
Solyc01g099620.3	Respiratory burst oxidase, putative (AHRD V3.3 *** B9RFA3_RICCO)	AT1G09090	respiratory burst oxidase homolog B	shared
Solyc10g079600.2	Two-component response regulator (AHRD V3.3 *** W9RA85_9ROSA)	AT3G57040	response regulator 9	shared
Solyc07g032730.3	rop guanine nucleotide exchange factor-like protein (AHRD V3.3 *** AT1G52240.1)	AT3G24620	RHO guanyl-nucleotide exchange factor 8	shared
Solyc10g008400.1	RING/U-box superfamily protein (AHRD V3.3 *-* AT1G74990.1)	AT4G03510	RING membrane-anchor 1	shared
Solyc12g008473.1	RING/U-box superfamily protein (AHRD V3.3 *-* AT1G55530.3)	AT2G40830	RING-H2 finger C1A	shared
Solyc02g078460.3	abscisic acid-insensitive RING protein 4-like	AT5G01520	RING/U-box superfamily protein	shared
Solyc02g082420.3	RING/U-box superfamily protein (AHRD V3.3 *** AT1G20823.1)	AT1G20823	RING/U-box superfamily protein	shared
Solyc03g033330.3	RING/U-box superfamily protein (AHRD V3.3 *** A0A061DF87_THECC)	AT4G35840	RING/U-box superfamily protein	shared
[truncated: 408 more rows]

## Sheet: TableS4
Supplemental table 4. Genes differentially expressed in slsdg34 vs WT in roots.
[truncated: 474 more rows]

## Sheet: TableS5
Supplemental Table S5. Significant GO terms of common up-regulated genes in shoots (determined by AgriGO2.0)
[truncated: 39 more rows]

[truncated: 12 more sheets: TableS6, TableS7, TableS8, TableS9, TableS10, TableS11, TableS12, TableS13, TableS14, TableS15, TableS16, TableS17]
